# Supplementary material for: Divergent stereochemical outcomes in the insertion of donor/donor carbenes into the C–H bonds of stereogenic centers
Source: Royal Society of Chemistry journal article supplement (doi:10.1039/d1sc04622e), 2021-12-20

## Supporting Information

### **Divergent Stereochemical Outcomes in the Insertion of Donor/Donor Carbenes into the C–H Bonds of Stereogenic Centers**

*Sarah N. Dishman, Croix J. Laconsay, James C. Fettingner, Dean J. Tantillo, and Jared T. Shaw\**

Department of Chemistry, University of California, One Shields Ave, Davis, CA, 95616

| <b>Table of Contents</b>                   | <b>Page</b> |
|--------------------------------------------|-------------|
| Materials and Instrumentation              | S3          |
| General Procedures                         | S3-4        |
| Starting Material Synthesis                | S5          |
| SI Figure 1: Hydrazone synthesis           | S5          |
| Alcohol substrates                         | S5          |
| Bromo-ether & Weinreb substrates           | S6-7        |
| Ketone substrates                          | S8-13       |
| Hydrazone substrates                       | S13-17      |
| Insertion substrates                       | S18-25      |
| Crystal structure substrates               | S26-29      |
| SI Figure 2: Crystal compound synthesis    | S26         |
| References                                 | S29         |
| Catalyst, Solvent, and Temperature Screens | S30-31      |
| SI Table 1: Catalyst screen                |             |
| SI Table 2: Solvent screen                 |             |
| SI Table 3: Temperature screen             |             |
| Chiral HPLC                                | S32-44      |
| X-Ray Crystallography Data                 | S45-101     |
| $^1\text{H}$ & $^{13}\text{C}$ NMR Spectra | S103-161    |

## **Materials and Instrumentation**

**General Comments.** Chemicals were purchased and used without further purification unless otherwise specified. All reactions using anhydrous solvents were carried out under an atmosphere of industrial argon in flame-dried glassware with magnetic stirring. Anhydrous solvent was dispensed from a solvent purification system that passes solvent through two columns of dry neutral alumina. Reactions were monitored by thin layer chromatography (TLC, Merck), and detected by examination under UV light (254 nm and 365 nm). Flash column chromatography was performed using silica gel [230–400 mesh (40–63  $\mu\text{m}$ )]. Extracts were concentrated *in vacuo* using both a rotary evaporator (bath temperatures up to 40  $^{\circ}\text{C}$ ) at a pressure of either 15 mmHg (diaphragm pump) or 0.1 mmHg (oil pump), as appropriate.  $^1\text{H}$  and proton-decoupled  $^{13}\text{C}$  spectra were measured in  $\text{CDCl}_3$  at 400, or 600 MHz, and 101 or 151 MHz respectively unless otherwise noted. All spectra in  $\text{CDCl}_3$  were referenced at TMS = 0 ppm. High-resolution mass spectrometry was performed on positive mode and ESI/Orbitrap<sup>™</sup>, ESI/TOF, and CI/TOF techniques were generally used. For substrates 24 and 25 high-resolution mass spectrometry using the aforementioned techniques was not achieved; low-resolution mass spectrometry using an Advion<sup>©</sup> ASAP-APCI-MS was achieved and the corresponding data is reported for those. Melting points were taken on an EZ-melting apparatus and were uncorrected. Infrared spectra were taken on a Bruker Tensor 27 spectrometer.

**General Procedure A (Mitsunobu reaction).** To a flame-dried 100 mL round bottom flask under argon atmosphere was added phenol (1.0 equiv), alcohol (1.1 equiv), and THF (0.1 M). The reaction was cooled to 0  $^{\circ}\text{C}$ , then triphenylphosphine (1.3 equiv) and diisopropyl azodicarboxylate (1.3 equiv) were added sequentially. After stirring overnight and allowing the reaction to warm to room temperature, the reaction was concentrated *in vacuo* and purified by flash column chromatography to yield the desired ether.

**General Procedure B (Benzophenone formation).** To a flame-dried 100 mL round bottom flask under argon atmosphere was added aryl bromide (1.0 equiv) and THF (0.25 M). The reaction was cooled to -78  $^{\circ}\text{C}$ , then *n*-BuLi (1.2 equiv) was added and the reaction was stirred at -78  $^{\circ}\text{C}$  for two hours. A solution of weinreb (1.0 equiv) in THF (0.8 M) was added to the reaction mixture, then the reaction was stirred overnight while allowing it to warm to room temperature. The reaction was cooled back down to -78  $^{\circ}\text{C}$  and quenched with saturated  $\text{NH}_4\text{Cl}$  aqueous solution. The mixture was extracted three times with EtOAc, then the combined organic layers were dried over  $\text{Na}_2\text{SO}_4$ , concentrated *in vacuo*, and purified by flash column chromatography to yield the desired ketone.

**General Procedure C (Hydrazone formation).** Following a literature precedent<sup>1</sup>, to an oven-dried 10-20 mL microwave vial under argon atmosphere was added the desired alkylated benzophenone (1.0 equiv) in anhydrous EtOH (0.1 M). Glacial acetic acid (2.0 equiv) and anhydrous hydrazine (8.0 equiv) were added dropwise to the solution. The reaction was heated to 80  $^{\circ}\text{C}$  for 3-12 hours until the starting material fully converted by TLC. After the reaction was cooled, it was diluted in diethyl ether (25 mL) then washed

with water (2 x 10 mL) and brine (1 x 10 mL). The organic layer was dried over Na<sub>2</sub>SO<sub>4</sub>, concentrated *in vacuo*, and purified by flash column chromatography to yield the desired hydrazone.

*Note: Hydrazones were isolated as a mixture of E/Z isomers or used without further purification. As such <sup>1</sup>H peaks have been reported only for selected examples.*

**General Procedure D (One-pot sequential C-H insertion).** To a flame-dried 20 mL scintillation vial under argon atmosphere was added a solution of hydrazone (1.0 equiv) in anhydrous CH<sub>2</sub>Cl<sub>2</sub> (0.01 M). To the solution was added MnO<sub>2</sub> (8.0 equiv), and the suspension was stirred until full conversion of the starting material to diazo was observed by TLC. A color change of the solution from clear to magenta was observed from the formation of the diazo. The reaction was cooled to 0 °C then the desired dirhodium catalyst was added (1 mol %), and the reaction was stirred while allowing it to warm to room temperature until full conversion of diazo to the desired product was observed. The crude reaction mixture was filtered over Celite to remove MnO<sub>2</sub>, concentrated *in vacuo*, and purified by flash column chromatography to yield the desired insertion product.

*Note: it is necessary that the MnO<sub>2</sub> used for the oxidation of hydrazones be ~85% pure with an average particle size of 2 microns, appearing as a fine black powder (e.g. Oakwood Chemical, CAS #: 1313-13-9, cat. #: 094454, lot #: 094454K03K).*

**General Procedure E (synthesis of Weinreb amide).** To a flame-dried round bottom flask was added the substituted benzoic acid (1.0 equiv) in DCM (0.3 M) and oxalyl chloride (2.0 equiv). DMF (1.3 equiv) was added dropwise, and the solution was stirred for 1 h. The solution was then concentrated *in vacuo* and re-diluted in DCM (30 mL). To a separate flame-dried round bottom flask were added *N,O*-dimethylhydroxylamine hydrochloride (1.5 equiv), Et<sub>3</sub>N (3.0 equiv), and DCM (0.3 M) and the solution was stirred for 10 min. The Weinreb salt solution was cooled down to 0 °C, then the acyl chloride solution was added dropwise and stirred at rt overnight. Upon completion, the reaction was quenched with sat. aq. NaHCO<sub>3</sub> (50 mL) and the mixture was extracted with CH<sub>2</sub>Cl<sub>2</sub> (3 x 50 mL). The combined organic layers were washed with H<sub>2</sub>O (2 x 30 mL) and brine (30 mL). The organic layer was dried over Na<sub>2</sub>SO<sub>4</sub>, filtered, and concentrated *in vacuo*. The crude reaction mixture was purified by flash column chromatography to yield the desired Weinreb amide.

## Starting Material Synthesis

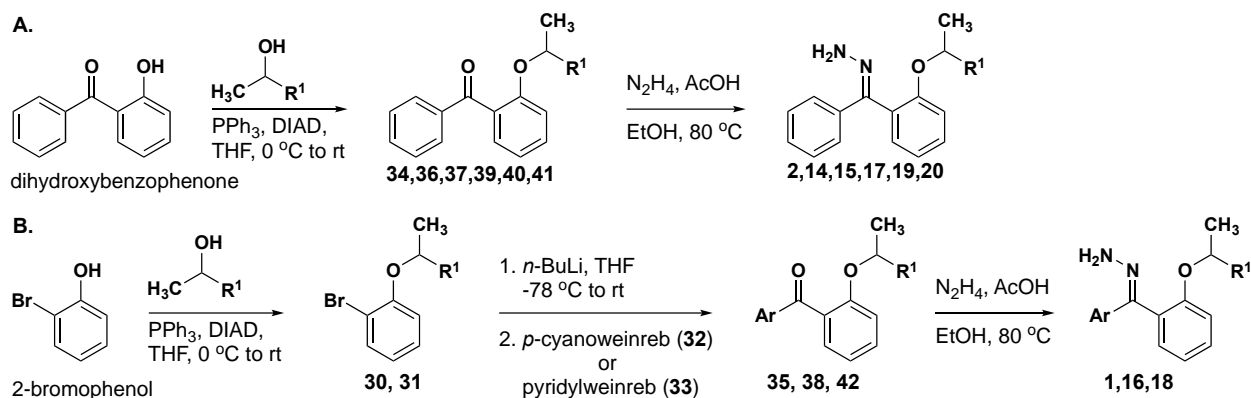

**SI Figure 1.** A. Synthesis of hydrazone intermediate from 2-hydroxybenzophenone. B. Synthesis of hydrazone intermediate from 2-bromophenol.

## Alcohol Substrates

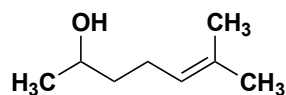

**(28) 6-methylhept-5-en-2-ol** was synthesized according to reported literature procedure<sup>2</sup> using 6-methylhept-5-en-2-one (5.0 g, 39.6 mmol), sodium borohydride (0.749 g, 19.8 mmol) with EtOH (132 mL, 0.3M) and H<sub>2</sub>O (40 mL, 0.5 M with NaBH<sub>4</sub>). After workup no further purification was needed to yield **28** as a clear oil (4.13g, 81%). <sup>1</sup>H NMR (400 MHz, CDCl<sub>3</sub>) δ 5.13 (t, *J* = 8.0 Hz, 1H), 3.81 (q, *J* = 6.4 Hz, 1H), 2.08 (hept, *J* = 7.3 Hz, 2H), 1.69 (s, 3H), 1.63 (s, 3H), 1.53 – 1.44 (m, 3H), 1.19 (d, *J* = 6.1 Hz, 3H). <sup>1</sup>H NMR data was consistent with literature values.<sup>2</sup>

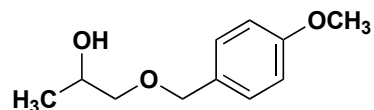

**(29) 1-((4-methoxybenzyl)oxy)propan-2-ol** was synthesized according to reported literature procedure<sup>3</sup> using propene oxide (1.00 g, 17.2 mmol), NaH (0.798 g, 19.8 mmol, 57% dispersion in mineral oil) with anhydrous DMF (27 mL, 0.7 M) and 4-methoxybenzyl alcohol (4.76 g, 34.4 mmol) with anhydrous DMF (17.2 mL, 2.0 M). The crude product was purified by flash column chromatography (40:60 EtOAc:Hexanes) affording alcohol **29** as a clear oil (2.56 g, 76%): <sup>1</sup>H NMR (400 MHz, CDCl<sub>3</sub>) δ 7.37 – 7.19 (m, 2H), 6.97 –

6.82 (m, 2H), 4.62 (s, 1H), 4.49 (s, 1H), 3.81 (s, 4H), 3.45 (dd,  $J = 9.4, 3.1$  Hz, 1H), 3.25 (t,  $J = 8.8$  Hz, 1H), 2.37 (br, 1H), 1.14 (d,  $J = 6.4$  Hz, 2H).  $^1\text{H}$  NMR data was consistent with literature values.<sup>3</sup>

### Bromo-ether Substrates

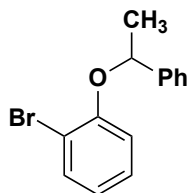

**(30) 1-bromo-2-(1-phenylethoxy)benzene** was synthesized according to general procedure A, 2-bromophenol (1.14 mL, 9.83 mmol), 1-phenylethan-1-ol (1.00 mL, 8.19 mmol), triphenylphosphine (2.79 g, 10.65 mmol), and DIAD (2.09 mL, 10.65 mmol) with anhydrous THF (82 mL) were used. The crude product was purified by flash column chromatography (10:90 EtOAc:hexanes) affording ether **30** as a light yellow oil (2.16 g, 95%):  $^1\text{H}$  NMR (600 MHz,  $\text{CDCl}_3$ )  $\delta$  7.50 (d,  $J = 7.8$  Hz, 1H), 7.41 – 7.36 (m, 2H), 7.32 (t, 2H), 7.24 (t, 1H), 7.06 (t,  $J = 7.8$  Hz, 1H), 6.76 – 6.70 (m, 2H), 5.34 (q,  $J = 6.4$  Hz, 1H), 1.67 (d,  $J = 6.5$  Hz, 3H).  $^{13}\text{C}$  NMR (151 MHz,  $\text{CDCl}_3$ )  $\delta$  154.43, 142.68, 133.45, 128.76(2), 128.26, 127.74, 125.71(2), 122.01, 115.60, 113.18, 77.41, 24.49; IR (thin film) 3063, 1584, 1494  $\text{cm}^{-1}$ ; TLC (20:80, EtOAc:hexanes)  $R_F = 0.85$ . Low-resolution MS (Advion ASAP-APCI)  $m/z$  calcd for  $\text{C}_{14}\text{H}_{13}\text{BrO}^+[\text{M}+\text{H}]^+$  277.0173, found 277.0.  $[\alpha]_D^{23} = +32.0$  ( $c = 0.30$ ,  $\text{CHCl}_3$ ).

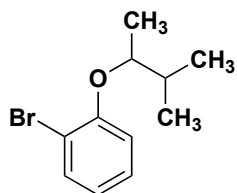

**(31) 1-bromo-2-((3-methylbutan-2-yl)oxy)benzene** was synthesized according to general procedure A, 2-bromophenol (3.35 mL, 28.9 mmol), 3-methyl-2-butanol (3.43 mL, 31.8 mmol), triphenylphosphine (9.10 g, 34.7 mmol), diisopropyl azodicarboxylate (6.81 mL, 34.7 mmol), and anhydrous THF (150 mL) were used. The crude product was purified by flash column chromatography (90:10, hexanes:EtOAc) affording ether **31** as a clear oil (3.97 g, 56%):  $^1\text{H}$  NMR (599 MHz,  $\text{CDCl}_3$ )  $\delta$  7.52 (d,  $J = 7.9$  Hz, 1H), 7.21 (t,  $J$

= 7.8 Hz, 1H), 6.87 (d,  $J = 8.3$  Hz, 1H), 6.78 (t,  $J = 7.6$  Hz, 1H), 4.20 (p,  $J = 6.0$  Hz, 1H), 1.97 (hd,  $J = 6.8, 5.1$  Hz, 1H), 1.26 (d,  $J = 6.3$  Hz, 3H), 1.03 (d,  $J = 6.8$  Hz, 3H), 1.01 (d,  $J = 6.8$  Hz, 3H);  $^{13}\text{C}$  NMR (150 MHz,  $\text{CDCl}_3$ )  $\delta$  154.92, 133.59, 128.35, 121.51, 114.90, 113.58, 80.03, 77.37, 77.16, 76.95, 33.26, 18.29, 18.04, 16.10.; IR (thin film) 3184, 1773, 1704  $\text{cm}^{-1}$ ; Low-resolution MS (Advion ASAP-APCI)  $m/z$  calcd for  $\text{C}_{11}\text{H}_{15}\text{BrO}^+[\text{M}+\text{H}]^+$  243.0379.1307 found 243.0.

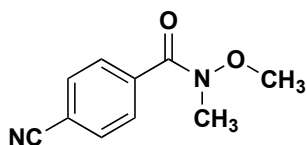

**(32) 4-cyano-*N*-methoxy-*N*-methylbenzamide** was synthesized according to general procedure E using 4-cyanobenzoic acid (8.00 g, 54.5 mmol) in  $\text{CH}_2\text{Cl}_2$  (181 mL), oxalyl chloride (9.3 mL, 108.7 mmol), DMF (5.46 mL, 70.75 mmol),  $\text{Et}_3\text{N}$  (22.8 mL, 163.2 mmol), and *N,O*-dimethylhydroxylamine hydrochloride (7.96 g, 81.6 mmol) in  $\text{CH}_2\text{Cl}_2$  (181 mL). The crude product was extracted from  $\text{NaHCO}_3$  (150 mL) with  $\text{CH}_2\text{Cl}_2$  (3 x 100 mL) and the combined organic layers were washed with  $\text{NaHCO}_3$  (2 x 50 mL) and brine (1 x 50 mL). The crude product was purified by flash column chromatography (90:10, hexanes:EtOAc) affording **32** as a clear oil (7.86 g, 76%).  $^1\text{H}$  NMR (400 MHz,  $\text{CDCl}_3$ )  $\delta$  7.78 (d,  $J = 7.6$  Hz, 2H), 7.71 (d,  $J = 8.1$  Hz, 2H), 3.53 (s, 3H), 3.38 (s, 3H).  $^1\text{H}$  NMR data was consistent with literature values.<sup>4</sup>

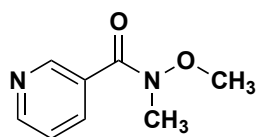

**(33) *N*-methoxy-*N*-methylnicotinamide** was synthesized by preparing a suspension of *N*-methoxy-*N*-methylamine $\cdot\text{HCl}$  (1.317 g, 13.50 mmol, 1.2 equiv.) in  $\text{CH}_2\text{Cl}_2$  (45.0 mL), following a modified literature procedure.<sup>4</sup> This suspension was cooled to 0  $^\circ\text{C}$  and triethylamine (6.25 mL, 44.8 mmol, 3.9 equiv) was added slowly over 20 minutes, the resulting solution was cooled to 0  $^\circ\text{C}$ . To the solution was added nicotinoyl chloride $\cdot\text{HCl}$  (2.032 g, 11.41 mmol, 1.0 equiv) and the mixture was allowed to warm to rt and stirred for 23 h, The reaction mixture was quenched with sat. aq.  $\text{NaHCO}_3$  (10 mL), and the organic layer was separated. The aqueous layer was then neutralized with 1 M  $\text{HCl}$  and

extracted with CH<sub>2</sub>Cl<sub>2</sub> (3 X 50 mL); the combined organic layers were washed with brine (2 X 100 mL) and dried over Na<sub>2</sub>SO<sub>4</sub>. The resulting solution was concentrated in vacuo and the crude product was purified using flash column chromatography (95:5, CH<sub>2</sub>Cl<sub>2</sub>:CH<sub>3</sub>OH), affording **33** as a yellow oil (1.568 g, 83%). <sup>1</sup>H NMR (400 MHz, CDCl<sub>3</sub>) δ 8.96 (d, *J* = 1.2 Hz, 1H), 8.69 (dd, *J* = 4.9, 1.7 Hz, 1H), 8.03 (dt, *J* = 7.9, 1.9 Hz, 1H), 7.37 (ddd, *J* = 7.9, 4.9, 0.9 Hz, 1H), 3.56 (s, 3H), 3.40 (s, 3H). <sup>1</sup>H NMR data was consistent with literature values.<sup>4</sup>

### Ketone Substrates

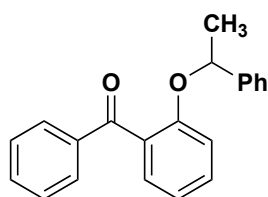

**(34) Phenyl(2-(1-phenylethoxy)phenyl)methanone** was synthesized according to general procedure A, 2-hydroxyphenyl(phenyl)methanone (1.00 g, 5.04 mmol), 1-phenylethan-1-ol (0.607 mL, 5.04 mmol), triphenylphosphine (1.59 g, 6.05 mmol), and DIAD (1.19 mL, 6.05 mmol) with anhydrous THF (50 mL) were used. The crude product was purified by flash column chromatography (10:90 EtOAc:hexanes) affording ketone **34** as a clear oil (1.26 g, 83%): <sup>1</sup>H NMR (600 MHz, CDCl<sub>3</sub>) δ 7.86 (d, *J* = 8.5 Hz, 2H), 7.70 (d, *J* = 6.7 Hz, 2H), 7.48 (d, *J* = 7.6 Hz, 1H), 7.40 – 7.34 (m, 1H), 7.28 – 7.22 (m, 4H), 7.06 – 7.00 (m, 3H), 6.83 (d, *J* = 8.4 Hz, 1H), 5.20 (q, *J* = 7.0, 6.4 Hz, 1H), 1.25 (d, *J* = 6.5 Hz, 3H).; <sup>13</sup>C NMR (150 MHz, CDCl<sub>3</sub>) δ 195.81, 156.20, 142.33, 142.16, 133.17, 132.12(2), 130.41, 129.76(2), 128.76(2), 128.31, 127.93(2), 125.41, 121.12, 118.39, 115.67, 114.08, 77.37, 77.20, 77.16, 76.95, 23.77.; IR (thin film) 3018, 2361, 2339, 1664 cm<sup>-1</sup>; TLC (10:90, EtOAc:hexanes) R<sub>F</sub> = 0.2. AMM (ESI) *m/z* calcd for C<sub>21</sub>H<sub>18</sub>O<sub>2</sub><sup>+</sup>[M+H]<sup>+</sup> 327.1259; [α]<sub>D</sub><sup>23</sup> = +124.4 (c = 1.4, CHCl<sub>3</sub>).



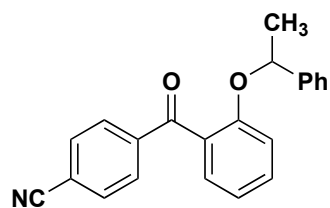

**(35) 4-(2-(1-phenylethoxy)benzoyl)benzonitrile** was synthesized according to general procedure B, 1-bromo-2-(1-phenylethoxy)benzene (5.00 g, 18.04 mmol) with anhydrous THF (60 mL), *n*-BuLi (2.28 M, 21.64 mmol, 9.50 mL), para-cyano Weinreb (4.12 g, 21.65 mmol) with anhydrous THF (27 mL) were used. The crude product was purified by flash column chromatography (30:70, EtOAc:hexanes) affording ketone **35** as a light yellow oil (2.66 g, 45%): <sup>1</sup>H NMR (600 MHz, CDCl<sub>3</sub>) δ 7.86 (d, *J* = 8.4 Hz, 2H), 7.71 (d, *J* = 8.5 Hz, 2H), 7.48 (d, *J* = 7.6 Hz, 1H), 7.37 (t, 1H), 7.28 – 7.22 (m, 4H), 7.07 – 7.00 (m, 3H), 6.83 (d, *J* = 8.4 Hz, 1H), 5.20 (q, *J* = 6.6 Hz, 1H), 1.25 (d, *J* = 6.4 Hz, 3H); <sup>13</sup>C NMR (150 MHz, CDCl<sub>3</sub>) δ 195.81, 156.20, 142.33, 142.16, 133.16, 132.12(2), 130.41, 129.76,(2) 128.75(2), 128.31, 127.93, 125.41(2), 121.12, 118.39, 115.67, 114.08, 77.20, 23.77; IR (thin film) 2977, 2229, 1662, 1448, 1236 cm<sup>-1</sup>; TLC (40:60, EtOAc:hexanes) R<sub>F</sub> = 0.45. AMM (ESI) *m/z* calcd for C<sub>22</sub>H<sub>17</sub>NO<sub>2</sub><sup>+</sup>[M+H]<sup>+</sup> 328.1332, found 328.1333; [ $\alpha$ ]<sub>D</sub><sup>23</sup> = +85.4 (c = 0.62, CHCl<sub>3</sub>)

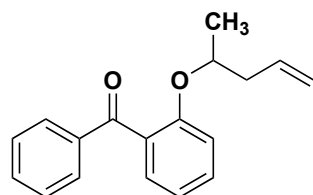

**(36) (2-(pent-4-en-2-yloxy)phenyl)(phenyl)methanone** was synthesized according to general procedure A, (2-hydroxyphenyl)(phenyl)methanone (5.51 g, 27.80 mmol), pent-4-en-2-ol (2.39 mL, 23.20 mmol), triphenylphosphine (7.92 g, 30.20 mmol), diisopropyl azodicarboxylate (5.93 mL, 30.20 mmol), and anhydrous THF (57 mL) were used. The crude product was purified by flash column chromatography (40:60, CH<sub>2</sub>Cl<sub>2</sub>:hexanes) affording ketone **36** as a light yellow oil (5.00 g, 81%): <sup>1</sup>H NMR (600 MHz, Chloroform-*d*) δ 7.78 (d, *J* = 8.2 Hz, 2H), 7.52 (t, *J* = 7.4 Hz, 1H), 7.45 – 7.36 (m, 4H), 7.01 (t, *J* = 7.4 Hz, 1H), 6.93 (d, *J* = 8.3 Hz, 1H), 4.25 (h, *J* = 6.0 Hz, 1H), 1.47 – 1.31 (m, 2H), 1.07 (d, *J* = 6.1 Hz, 3H), 0.67 (t, *J* = 7.5 Hz, 3H); <sup>13</sup>C NMR (100 MHz, CDCl<sub>3</sub>) δ 198.47, 149.25, 137.96, 133.82, 132.74, 131.93, 130.21, 130.01, 129.72(2), 128.18(2), 122.15, 118.40,

113.74, 74.24, 41.07, 18.01; IR (thin film) 3063, 2978, 1692, 1584, 1493  $\text{cm}^{-1}$ ; AMM (ESI)  $m/z$  calcd for  $\text{C}_{18}\text{H}_{18}\text{O}_2^+[\text{M}+\text{H}]^+$  266.1307 found 267.1378;  $[\alpha]_D^{23} = +95.5$  ( $c = 0.35$ ,  $\text{CHCl}_3$ )

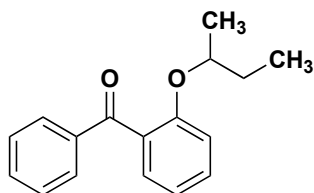

**(37) (2-(sec-butoxy)phenyl)(phenyl)methanone** was synthesized according to general procedure A, (2-hydroxyphenyl)(phenyl)methanone (0.50 g, 2.52 mmol), 2-butanol (0.26 mL, 2.77 mmol), triphenylphosphine (0.86 g, 3.28 mmol), diisopropyl azodicarboxylate (0.64 mL, 3.28 mmol), and anhydrous THF (25 mL) were used. The crude product was purified by flash column chromatography (40:60,  $\text{CH}_2\text{Cl}_2$ :hexanes) affording ether **37** as a light yellow oil (0.574 g, 90%):  $^1\text{H}$  NMR (600 MHz,  $\text{CDCl}_3$ )  $\delta$  7.78 (d,  $J = 8.1$  Hz, 2H), 7.52 (t,  $J = 7.4$  Hz, 1H), 7.45 – 7.37 (m, 4H), 7.01 (t,  $J = 7.4$  Hz, 1H), 6.93 (d,  $J = 8.3$  Hz, 1H), 4.25 (h,  $J = 6.0$  Hz, 1H), 1.47 – 1.38 (m, 1H), 1.39 – 1.30 (m, 1H), 1.07 (d,  $J = 6.1$  Hz, 3H), 0.67 (t,  $J = 7.4$  Hz, 3H);  $^{13}\text{C}$  NMR (150 MHz,  $\text{CDCl}_3$ )  $\delta$  197.41, 155.99, 138.53, 132.70, 131.89, 130.14, 129.93, 129.70(2), 128.15(2), 120.37, 113.59, 77.37, 77.16, 76.95, 75.38, 28.91, 18.63, 9.31. IR (thin film) 3020, 2975, 2361, 1776, 1664  $\text{cm}^{-1}$ ; AMM (ESI)  $m/z$  calcd for  $\text{C}_{17}\text{H}_{18}\text{O}_2^+[\text{M}+\text{H}]^+$  255.1380 found 255.1379;  $[\alpha]_D^{23} = -43.6$  ( $c = 1.29$ ,  $\text{CHCl}_3$ )

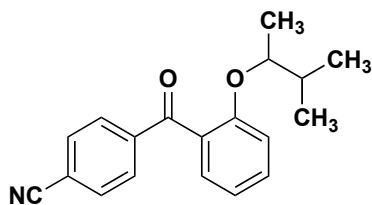

**(38) 4-(2-((3-methylbutan-2-yl)oxy)benzoyl)benzonitrile** was synthesized according to general procedure B, 1-bromo-2-((3-methylbutan-2-yl)oxy)benzene (1.96 g, 8.06 mmol) with anhydrous THF (56 mL),  $n\text{-BuLi}$  (1.7 M, 10.48 mmol, 6.16 mL), para-cyano Weinreb (1.89 g, 9.67 mmol) with anhydrous THF (23 mL) were used. The crude product was purified by flash column chromatography (30:70, EtOAc:hexanes) affording ketone **38** as a light yellow oil (1.37 g, 58%):  $^1\text{H}$  NMR (400 MHz, Chloroform- $d$ )  $\delta$  7.85

(d,  $J = 8.3$  Hz, 2H), 7.71 (d,  $J = 8.2$  Hz, 2H), 7.54 – 7.43 (m, 2H), 7.04 (t,  $J = 7.4$  Hz, 1H), 6.94 (d,  $J = 8.8$  Hz, 1H), 4.17 (dt, 1H), 1.61 – 1.51 (m, 1H), 1.02 (d,  $J = 6.2$  Hz, 3H), 0.65 – 0.55 (m, 6H);  $^{13}\text{C}$  NMR (101 MHz,  $\text{CDCl}_3$ )  $\delta$  196.00, 156.31, 142.32, 133.17, 132.11(2), 130.58, 129.81(2), 128.59, 120.65, 118.41, 115.59, 113.19, 79.05, 33.36, 17.59, 17.51, 15.26.; IR (thin film) 3046, 2971 1774  $\text{cm}^{-1}$ ; AMM (ESI)  $m/z$  calcd for  $\text{C}_{19}\text{H}_{19}\text{NO}_2^+[\text{M}-\text{H}]^-$  293.1416, found 293.1809.

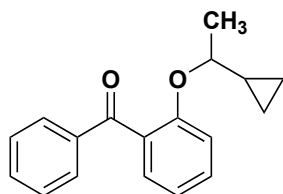

**(39) (2-(1-cyclopropylethoxy)phenyl)(phenyl)methanone** was synthesized according to general procedure A, (2-hydroxyphenyl)(phenyl)methanone (0.500 g, 2.52 mmol), 1-cyclopropylethan-1-ol (0.271 mL, 2.77 mmol), triphenylphosphine (0.860 g, 3.28 mmol), diisopropyl azodicarboxylate (0.644 mL, 3.28 mmol), and anhydrous THF (25 mL) were used. The crude product was purified by flash column chromatography (10:90, EtOAc:hexanes) affording ketone **39** as a pale yellow oil (0.495 g, 74%):  $^1\text{H}$  NMR (600 MHz,  $\text{CDCl}_3$ )  $\delta$  7.82 (dd,  $J = 8.3, 1.4$  Hz, 2H), 7.59 – 7.54 (m, 1H), 7.47 – 7.41 (m, 4H), 7.06 (td,  $J = 7.5, 1.0$  Hz, 1H), 6.98 (d,  $J = 9.0$  Hz, 1H), 3.89 (p,  $J = 6.2$  Hz, 1H), 1.16 (d,  $J = 6.1$  Hz, 3H), 0.79 (tdt,  $J = 8.2, 6.7, 5.1$  Hz, 1H), 0.34 (tdd,  $J = 8.6, 5.5, 4.2$  Hz, 1H), 0.27 (dddd,  $J = 9.2, 7.9, 5.4, 4.3$  Hz, 1H), 0.08 (dtd,  $J = 9.4, 5.2, 4.3$  Hz, 1H), 0.05 – 0.00 (m, 1H);  $^{13}\text{C}$  NMR (150 MHz,  $\text{CDCl}_3$ )  $\delta$  197.28, 155.96, 138.38, 132.70, 131.84, 130.48, 129.92, 129.73(2), 128.17, 120.79, 114.84, 78.00, 22.04, 19.28, 16.40, 3.11, 1.60; IR (thin film) 2978, 1659, 1596  $\text{cm}^{-1}$  AMM (ESI)  $m/z$  calcd for  $\text{C}_{18}\text{H}_{18}\text{O}_2^+[\text{M}+\text{H}]^+$  267.1380, found 267.1378.

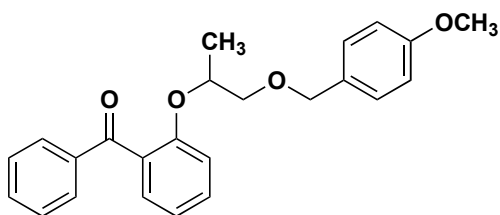

**(40) (2-((1-(4-methoxybenzyl)oxy)propan-2-yl)oxy)phenyl)(phenyl)methanone** was synthesized according to general procedure A, (2-hydroxyphenyl)(phenyl)methanone (1.00 g, 5.04 mmol),

1-((4-methoxybenzyl)oxy)propan-2-ol (1.09 g, 5.55 mmol), triphenylphosphine (1.72 g, 6.55 mmol), diisopropyl azodicarboxylate (1.29 mL, 6.55 mmol), and anhydrous THF (51 mL) were used. The crude product was purified by flash column chromatography (10:90, EtOAc:hexanes) affording ketone **40** as a pale yellow oil (1.73 g, 92%):  $^1\text{H}$  NMR (400 MHz,  $\text{CDCl}_3$ )  $\delta$  7.78 (d,  $J = 6.9$  Hz, 2H), 7.51 (t,  $J = 7.4$  Hz, 1H), 7.40 (tt,  $J = 9.8$ , 6.8 Hz, 4H), 7.11 (d,  $J = 8.6$  Hz, 2H), 7.07 – 6.97 (m, 2H), 6.82 (d,  $J = 8.6$  Hz, 2H), 4.49 (h,  $J = 6.1$  Hz, 1H), 4.27 (d,  $J = 2.0$  Hz, 2H), 3.78 (s, 3H), 3.32 (dd,  $J = 10.2$ , 5.7 Hz, 1H), 3.23 (dd,  $J = 10.2$ , 4.9 Hz, 1H), 1.09 (d,  $J = 6.3$  Hz, 3H);  $^{13}\text{C}$  NMR (100 MHz,  $\text{CDCl}_3$ )  $\delta$  197.05, 159.20, 155.79, 138.33, 132.75, 131.88, 130.28, 130.10, 129.79, 129.73(2), 129.23(2), 128.17(2), 120.81, 114.05, 113.77(2), 77.48, 77.16, 76.84, 74.04, 73.04, 72.87, 55.33, 16.78; IR (thin film) 2923, 1663, 1597  $\text{cm}^{-1}$ . AMM (ESI)  $m/z$  calcd for  $\text{C}_{24}\text{H}_{24}\text{O}_4^+[\text{M}+\text{H}]^+$  377.1748, found 377.1731.

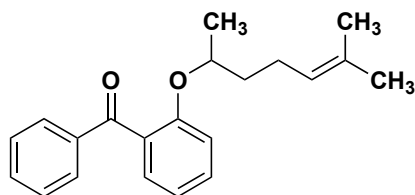

**(41) (2-((6-methylhept-5-en-2-yl)oxy)phenyl)(phenyl)methanone** was synthesized according to general procedure A, (2-hydroxyphenyl)(phenyl)methanone (1.00 g, 5.04 mmol), 6-methylhept-5-en-2-ol (0.712 g, 5.55 mmol), triphenylphosphine (1.72 g, 6.55 mmol), diisopropyl azodicarboxylate (1.29 mL, 6.55 mmol), and anhydrous THF (51 mL) were used. The crude product was purified by flash column chromatography (10:90, EtOAc:hexanes) affording ketone **41** as a pale yellow oil (1.13 g, 73%):  $^1\text{H}$  NMR (400 MHz,  $\text{CDCl}_3$ )  $\delta$  7.81 – 7.76 (m, 2H), 7.56 – 7.49 (m, 1H), 7.44 – 7.37 (m, 4H), 7.01 (td,  $J = 7.5$ , 0.9 Hz, 1H), 6.92 (d,  $J = 8.3$  Hz, 1H), 4.95 (t,  $J = 7.2$  Hz, 1H), 4.31 (h,  $J = 6.0$  Hz, 1H), 1.79 (dt,  $J = 7.7$ , 7.7 Hz, 2H), 1.64 (s, 3H), 1.46 (s, 3H), 1.45 – 1.39 (m, 1H), 1.39 – 1.29 (m, 1H), 1.09 (d,  $J = 6.0$  Hz, 3H);  $^{13}\text{C}$  NMR (100 MHz,  $\text{CDCl}_3$ )  $\delta$  197.38, 155.95, 138.54, 132.73, 132.17, 131.88, 130.15, 129.92, 129.71(2), 128.18(2), 123.75, 120.36, 113.48, 77.48, 77.16, 76.84, 73.56, 36.25, 25.80, 23.71, 19.16, 17.73; IR (thin film) 2970, 1661, 1595  $\text{cm}^{-1}$  AMM (ESI)  $m/z$  calcd for  $\text{C}_{21}\text{H}_{24}\text{O}_2^+[\text{M}+\text{H}]^+$  309.1849, found 309.1858.

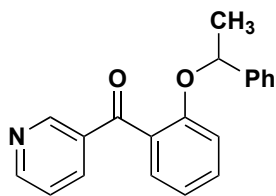

**(42) (2-(1-phenylethoxy)phenyl)(pyridin-3-yl)methanone** was synthesized according to general procedure B. 1-bromo-2-((3-methylbutan-2-yl)oxy)benzene (0.500 g, 1.80 mmol) with anhydrous THF (6.7 mL), *n*-BuLi (2.28 M, 2.34 mmol, 1.03 mL), *N*-methoxy-*N*-methylnicotinamide (0.359 g, 2.16 mmol) with anhydrous THF (2.7 mL) were used. The crude product was purified by flash column chromatography (50:50, EtOAc:hexanes) affording ketone **42** as a yellow oil (0.221 g, 41%):  $^1\text{H}$  NMR (400 MHz,  $\text{CDCl}_3$ )  $\delta$  8.96 (d,  $J = 1.6$  Hz, 1H), 8.76 (dd,  $J = 4.9, 1.7$  Hz, 1H), 8.13 (dt,  $J = 7.9, 2.0$  Hz, 1H), 7.49 (dd,  $J = 7.5, 1.8$  Hz, 1H), 7.45 – 7.31 (m, 2H), 7.30 – 7.19 (m, 4H), 7.13 – 7.07 (m, 2H), 7.02 (td,  $J = 7.5, 0.9$  Hz, 1H), 6.81 (d,  $J = 8.6$  Hz, 1H), 5.22 (q,  $J = 6.4$  Hz, 1H), 1.25 (d,  $J = 6.4$  Hz, 3H);  $^{13}\text{C}$  NMR (100 MHz,  $\text{CDCl}_3$ )  $\delta$  195.54, 156.04, 152.79, 151.07, 142.28, 136.33, 134.15, 132.87, 130.19, 128.67(2), 128.42, 127.68, 125.29(2), 123.20, 120.97, 114.07, 77.03, 23.84; IR (thin film) 3032, 2978, 1663, 1596, 1301  $\text{cm}^{-1}$ ; AMM (ESI)  $m/z$  calcd for  $\text{C}_{20}\text{H}_{19}\text{N}_3\text{O}^+[\text{M}+\text{H}]^+$  304.1332, found 304.1331.

### Hydrazone Substrates

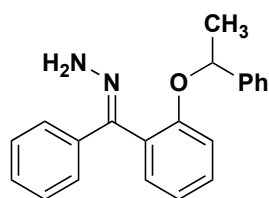

**(15) Phenyl(2-(1-phenylethoxy)phenyl)methylenehydrazine** was synthesized according to general procedure C, phenyl(2-(1-phenylethoxy)phenyl)methanone (0.600 g, 1.98 mmol), hydrazine (0.623 mL, 19.84 mmol), glacial acetic acid (0.230 mL, 3.97 mmol) with anhydrous EtOH (6.6 mL) were used. After workup, the mixture was purified by flash column chromatography (30:70, EtOAc:hexanes) affording hydrazone **15** as a yellow oil (0.478 g, 76%): Note: due to restricted rotation and the mix of isomers many of the  $^1\text{H}$  peaks are broadened, see attached spectra  $^1\text{H}$  NMR (400 MHz,  $\text{CDCl}_3$ )  $\delta$  7.58 –

7.41 (m, 2H), 7.37 – 7.17 (m, 8H), 7.17 – 7.06 (m, 2H), 7.06 – 6.95 (m, 1H), 6.90 (d,  $J = 8.3$  Hz, 1H), 5.45 – 5.14 (m, 2H), 1.37 (s, 3H); IR (thin film) 3015, 2997, 2361, 2339  $\text{cm}^{-1}$ ; AMM (ESI)  $m/z$  calcd for  $\text{C}_{21}\text{H}_{20}\text{N}_2\text{O}^+[\text{M}+\text{H}]^+$  317.1649, found 317.1651;  $[\alpha]_D^{22} = +48.0$  ( $c = 1.9$ ,  $\text{CHCl}_3$ )

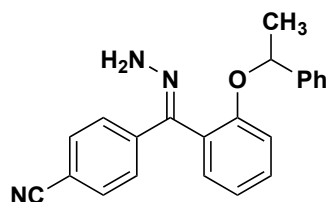

**(1) 4-(hydrazineylidene(2-(1-phenylethoxy)phenyl)methyl)benzonitrile** was synthesized according to general procedure C, 4-(2-(1-phenylethoxy)benzoyl)benzonitrile (0.423 g, 1.29 mmol), hydrazine (0.324 mL, 10.32 mmol), glacial acetic acid (0.148 mL, 2.58 mmol) with anhydrous EtOH (4.3 mL) were used. After workup hydrazone **1** was afforded as a mix of two isomers and a light yellow oil (0.348 g, 87%): Note: due to restricted rotation and the mix of isomers many of the  $^1\text{H}$  peaks are broadened, see attached spectra.  $^1\text{H}$  NMR (600 MHz,  $\text{CDCl}_3$ )  $\delta$  7.65 – 7.47 (m, 3H), 7.37 – 7.17 (m, 5H), 7.17 – 6.97 (m, 3H), 6.97 – 6.81 (m, 1H), 5.80 – 5.53 (m, 2H), 5.36 – 5.16 (m, 1H), 3.70 (qd,  $J = 7.0, 0.9$  Hz, 1H), 1.60 – 1.40 (m, 2H), 1.40 – 1.28 (m, 1H), 1.24 (h,  $J = 7.2$  Hz, 2H); IR (thin film) 3417, 2977, 2223  $\text{cm}^{-1}$ ; TLC (40:60, EtOAc:hexanes)  $R_F = 0.85$ . AMM (ESI)  $m/z$  calcd for  $\text{C}_{22}\text{H}_{19}\text{NO}_3^+[\text{M}+\text{H}]^+$  342.1601, found 342.1603;  $[\alpha]_D^{22} = +65.7$  ( $c = 1.2$ ,  $\text{CHCl}_3$ )

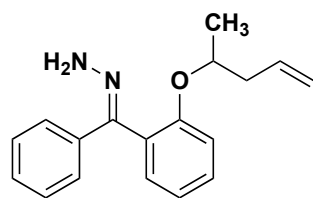

**(2) ((2-(pent-4-en-2-yloxy)phenyl)(phenyl)methylene)hydrazine** was synthesized according to general procedure C, (2-(pent-4-en-2-yloxy)phenyl)(phenyl)methanone (0.689 g, 2.59 mmol), hydrazine (0.651 mL, 20.72 mmol), glacial acetic acid (0.296 mL, 5.18 mmol), and anhydrous EtOH (8.6 mL) were used. After workup, hydrazone **2** was afforded as a light yellow oil (0.629, 87%) and was carried through to the insertion.

Note: due to restricted rotation and the mix of isomers many of the  $^1\text{H}$  peaks are broadened, see attached spectra:  $^1\text{H}$  NMR (600 MHz,  $\text{CDCl}_3$ )  $\delta$  7.50 – 7.45 (m, 2H), 7.45 – 7.38 (m, 1H), 7.35 – 7.23 (m, 3H), 7.19 – 7.11 (m, 1H), 7.11 – 7.03 (m, 2H), 5.44 (s, 2H), 5.13 – 4.82 (m, 2H), 4.40 (s, 1H), 2.47 – 2.07 (m, 2H), 1.38 – 1.00 (m, 3H); IR (thin film) 3404, 3060, 2975, 1641, 1596  $\text{cm}^{-1}$ ; AMM (ESI)  $m/z$  calcd for  $\text{C}_{18}\text{H}_{20}\text{N}_2\text{O}^+[\text{M}+\text{H}]^+$  281.1649, found 281.1649.

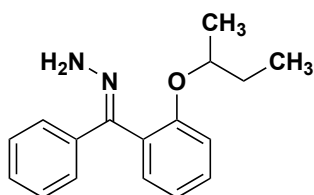

**(14) ((2-(sec-butoxy)phenyl)(phenyl)methylene)hydrazine** was synthesized according to general procedure C, (2-(sec-butoxy)phenyl)(phenyl)methanone (0.143 g, 0.563 mmol), hydrazine (0.179 mL, 5.63 mmol), glacial acetic acid (0.064 g, 1.13 mmol), and anhydrous EtOH (1.88 mL) were used. After workup, the mixture was purified by flash column chromatography (20:80, EtOAc:hexanes) affording hydrazone **14** as a yellow oil (0.116 g, 77%):  $^1\text{H}$  NMR (600 MHz,  $\text{CDCl}_3$ )  $\delta$  7.49 – 7.43 (m, 2H), 7.42 – 7.36 (m, 1H), 7.29 – 7.20 (m, 3H), 7.13 (dd,  $J = 7.4, 1.8$  Hz, 1H), 7.08 – 6.99 (m, 2H), 5.45 (s, 2H), 4.28 (h,  $J = 6.1$  Hz, 1H), 1.72 – 1.35 (m, 2H), 1.35 – 0.97 (m, 4H), 0.97 – 0.55 (m, 3H); IR (thin film) 3023, 2997, 2363, 2337  $\text{cm}^{-1}$  AMM (ESI)  $m/z$  calcd for  $\text{C}_{19}\text{H}_{21}\text{N}_3\text{O}^+[\text{M}+\text{H}]^+$  308.1758, found 308.1760.  $[\alpha]_D^{23} = -10.2$  ( $c = 0.53, \text{CHCl}_3$ )

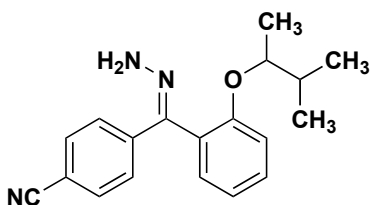

**(18) 4-(hydrazineylidene(2-((3-methylbutan-2-yl)oxy)phenyl)methyl)benzonitrile** was synthesized according to general procedure C, 4-(2-((3-methylbutan-2-yl)oxy)benzoyl)benzonitrile (1.37 g, 4.65 mmol), hydrazine (1.17 mL, 37.20 mmol), glacial acetic acid (0.532 g, 9.30 mmol), and anhydrous EtOH (15.5 mL) were used. After workup, the mixture was purified by flash column chromatography (50:50,

EtOAc:hexanes) affording hydrazone **18** as an orange oil (0.455 g, 32%):  $^1\text{H NMR}$  (400 MHz,  $\text{CDCl}_3$ )  $\delta$  7.54 (s, 3H), 7.42 (t,  $J = 7.8$  Hz, 1H), 7.13 (d,  $J = 7.4$  Hz, 1H), 7.09 – 6.99 (m, 1H), 5.67 (s, 1H), 4.14 (dt,  $J = 14.7, 6.6$  Hz, 1H), 1.25 (td,  $J = 6.4, 3.4$  Hz, 1H), 1.21 – 1.09 (m, 1H), 1.00 (td,  $J = 7.3, 3.7$  Hz, 2H), 0.89 – 0.58 (m, 4H); IR (thin film) 3021, 2998, 2325  $\text{cm}^{-1}$ ; AMM (ESI)  $m/z$  calcd for  $\text{C}_{19}\text{H}_{21}\text{N}_3\text{O}^+[\text{M}+\text{H}]^+$  308.1758, found 308.1760.

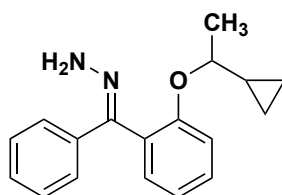

**(17) ((2-(1-cyclopropylethoxy)phenyl)(phenyl)methylene)hydrazine** was synthesized according to general procedure C, (2-(1-cyclopropylethoxy)phenyl)(phenyl)methanone (0.363g, 1.36 mmol), hydrazine (0.342 mL, 10.88 mmol), glacial acetic acid (0.156 mL, 2.72 mmol), and anhydrous EtOH (4.5 mL) were used. After workup, the mixture was purified by flash column chromatography (40:60 EtOAc:Hexanes) affording hydrazone **17** as a yellow oil (0.236g, 62%):  $^1\text{H NMR}$  (600 MHz,  $\text{CDCl}_3$ )  $\delta$  7.31 – 7.23 (m, 1H), 7.09 – 7.02 (m, 1H), 3.72 (qd,  $J = 7.0, 1.5$  Hz, 1H), 1.43 (s, 1H), 1.29 – 1.20 (m, 3H), 0.51 – 0.07 (m, 1H); IR (thin film) 3400, 2978, 1724, 1484  $\text{cm}^{-1}$ ; AMM (ESI)  $m/z$  calcd for  $\text{C}_{18}\text{H}_{20}\text{N}_2\text{O}^+[\text{M}+\text{H}]^+$  281.1649, found 281.1649.

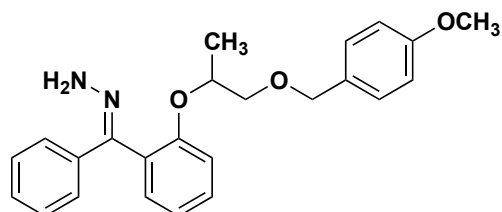

**(19) (2-((1-((4-methoxybenzyl)oxy)propan-2-yl)oxy)phenyl)(phenyl)methylene)hydrazine** was synthesized according to general procedure C, (2-((1-((4-methoxybenzyl)oxy)propan-2-yl)oxy)phenyl)(phenyl)methanone (0.181 g, 0.481 mmol), hydrazine (0.121 mL, 3.85 mmol), glacial acetic acid (0.055 mL, 0.962 mmol), and anhydrous EtOH (1.6 mL) were used. After workup, the mixture was



purified by flash column chromatography (80:20 EtOAc:Hexanes) affording hydrazone **19** as a clear oil (0.179 g, 95%):  $^1\text{H NMR}$  (400 MHz,  $\text{CDCl}_3$ )  $\delta$  7.52 – 7.44 (m, 2H), 7.43 – 7.35 (m, 1H), 7.31 – 7.22 (m, 3H), 7.21 – 7.04 (m, 5H), 6.91 – 6.76 (m, 2H), 5.43 (s, 2H), 4.56 (q,  $J = 5.8$  Hz, 1H), 4.48 – 4.21 (m, 2H), 3.79 (s, 3H), 3.43 (s, 2H), 1.30 – 1.06 (m, 4H); IR (thin film) 3406, 3000, 1511; AMM (ESI)  $m/z$  calcd for  $\text{C}_{24}\text{H}_{26}\text{N}_2\text{O}_3^+[\text{M}+\text{H}]^+$  391.2016, found 391.2005.

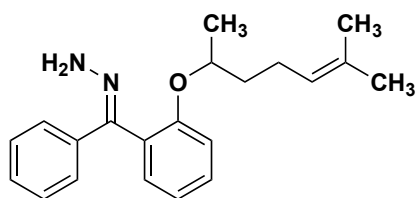

**(20) ((2-((6-methylhept-5-en-2-yl)oxy)phenyl)(phenyl)methylene)hydrazine** was synthesized according to general procedure C, (2-((6-methylhept-5-en-2-yl)oxy)phenyl)(phenyl)methanone (0.500 g, 1.62 mmol), hydrazine (0.407 mL, 13.0 mmol), glacial acetic acid (0.185 mL, 3.24 mmol), and anhydrous EtOH (5.4 mL) were used. After workup, the mixture was purified by flash column chromatography (70:30 EtOAc:Hexanes) affording hydrazone **20** as a clear oil (0.173 g, 87%):  $^1\text{H NMR}$  (400 MHz,  $\text{CDCl}_3$ )  $\delta$  7.49 – 7.43 (m, 2H), 7.43 – 7.36 (m, 1H), 7.30 – 7.22 (m, 3H), 7.14 (dd,  $J = 7.5, 1.8$  Hz, 1H), 7.08 – 6.99 (m, 2H), 5.43 (s, 2H), 4.97 (s, 1H), 4.35 (h,  $J = 6.1$  Hz, 1H), 1.97 (s, 1H), 1.65 (s, 4H), 1.56 (s, 2H), 1.49 – 1.36 (m, 3H), 1.24 – 1.03 (m, 3H); IR (thin film) 3404, 2968, 1595, 1482; AMM (ESI)  $m/z$  calcd for  $\text{C}_{21}\text{H}_{26}\text{N}_2\text{O}^+[\text{M}+\text{H}]^+$  323.2118, found 323.2113.

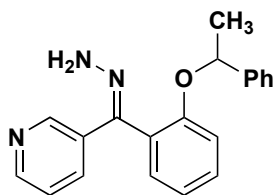

**(16) 3-(hydrazineylidene(2-(1-phenylethoxy)phenyl)methyl)pyridine** was synthesized according to general procedure C, (2-(1-phenylethoxy)phenyl)(pyridin-3-yl)methanone (0.200 g, 0.659 mmol), hydrazine (0.180 mL, 5.27 mmol), glacial acetic acid (0.075 mL, 1.32 mmol), and anhydrous EtOH (2.2 mL) were used. After workup,

the mixture was purified by flash column chromatography (70:30 EtOAc:Hexanes) affording hydrazone **16** as a clear oil (0.173 g, 83%):  $^1\text{H}$  NMR (400 MHz,  $\text{CDCl}_3$ )  $\delta$  8.65 (s, 1H), 8.50 (d,  $J = 4.8$  Hz, 1H), 7.82 (s, 1H), 7.47 – 7.08 (m, 8H), 7.03 (t,  $J = 7.4$  Hz, 1H), 6.92 (d,  $J = 8.4$  Hz, 1H), 5.60 (s, 2H), 5.27 (s, 1H), 1.70 – 1.21 (m, 3H); IR (thin film) 3397, 2977, 1663, 1597; AMM (ESI)  $m/z$  calcd for  $\text{C}_{20}\text{H}_{19}\text{N}_3\text{O}^+[\text{M}+\text{H}]^+$  318.1601, found 318.1606.

### Insertion Substrates

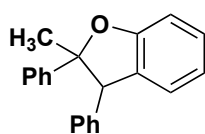

**(22) 2-methyl-2,3-diphenyl-2,3-dihydrobenzofuran** was synthesized according to general procedure D, phenyl(2-(1-phenylethoxy)phenyl)methylene)hydrazine (0.035 g, 0.111), manganese(IV) dioxide (0.076 g, 0.885 mmol),  $\text{Rh}_2(\text{mes})_4$  (0.00095 g, 0.001 mmol) with anhydrous DCM (7.37 mL). After filtration, the crude product was purified by flash column chromatography (10:90, EtOAc:hexanes) affording dihydrobenzofuran **22** as a light yellow oil (0.027 g, 86%):

All catalysts screened ( $\text{Rh}_2(\text{R-PTAD})_4$ ,  $\text{Rh}_2(\text{S-PTAD})_4$ ,  $\text{Rh}_2(\text{mes})_4$ ) with both racemic and enantiopure starting material yielded >95:5 dr of the same, single diastereomer. The racemic standard was never able to be separated on a chiral HPLC to obtain enantiomeric ratios.

$^1\text{H}$  NMR (400 MHz,  $\text{CDCl}_3$ )  $\delta$  7.24 (t,  $J = 7.7$  Hz, 1H), 7.06 – 6.92 (m, 10H), 6.87 (t,  $J = 7.4$  Hz, 1H), 6.75 – 6.66 (m, 2H), 4.64 (s, 1H), 1.93 (s, 3H);  $^{13}\text{C}$  NMR (100 MHz,  $\text{CDCl}_3$ )  $\delta$  159.37, 142.17, 139.85, 130.97, 129.34(2), 128.88, 128.54, 127.87(2), 127.42(2), 126.74, 126.54, 126.05(2), 121.07, 109.79, 93.50, 77.48, 77.16, 76.84, 61.11, 29.40; IR (thin film) 3028, 2967, 1216  $\text{cm}^{-1}$ ; AMM (ESI)  $m/z$  calcd for  $\text{C}_{21}\text{H}_{18}\text{O}^+[\text{M}+\text{H}]^+$  287.1473, found 287.1471.  $[\alpha]_D^{23} = -3.47$  ( $c = 1.4$ ,  $\text{CHCl}_3$ ).

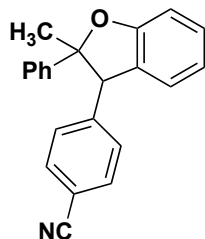

**(5) 4-(2-methyl-2-phenyl-2,3-dihydrobenzofuran-3-yl)benzotrile** was synthesized according to general procedure D, 4-(hydrazineylidene(2-(1-phenylethoxy)phenyl)methyl)benzotrile (0.450 g, 1.32 mmol), manganese(IV) dioxide (0.908 g, 10.56 mol),  $\text{Rh}_2(\text{R-PTAD})_4$  (0.021 g, 0.0132 mmol) with anhydrous DCM (88 mL). After filtration, the crude product was purified by flash column chromatography (20:80, EtOAc:hexanes) affording dihydrobenzofuran **5** as a light yellow oil (0.336 g, 82%):

All catalysts screened ( $\text{Rh}_2(\text{R-PTAD})_4$ ,  $\text{Rh}_2(\text{S-PTAD})_4$ ,  $\text{Rh}_2(\text{mes})_4$ ) with both racemic and enantiopure starting material yielded >95:5 dr of the same, single diastereomer. The corresponding enantiomeric ratios can be found in the main text, Table 1.

$^1\text{H}$  NMR (600 MHz,  $\text{CDCl}_3$ )  $\delta$  7.30 – 7.24 (m, 3H), 7.08 – 7.00 (m, 6H), 6.94 (d,  $J = 7.3$  Hz, 1H), 6.90 (t,  $J = 7.4$  Hz, 1H), 6.82 (d,  $J = 7.8$  Hz, 2H), 4.64 (s, 1H), 1.93 (s, 3H);  $^{13}\text{C}$  NMR (150 MHz,  $\text{CDCl}_3$ )  $\delta$  159.13, 145.99, 141.48, 131.67(2), 129.88(2), 129.84, 129.50, 127.81(2), 127.03, 125.92, 125.79(2), 121.41, 118.93, 110.44, 110.30, 93.38, 60.81, 29.40; IR (thin film) 2974, 2226, 1596, 1497  $\text{cm}^{-1}$ ; TLC (10:90, EtOAc:hexanes)  $R_f = 0.9$ . AMM (ESI)  $m/z$  calcd for  $\text{C}_{22}\text{H}_{17}\text{NO}^+[\text{M}+\text{H}]^+$  312.1383, found 312.1376.  $[\alpha]_D^{23} = -5.62$  ( $c = 0.69$ ,  $\text{CHCl}_3$ ).

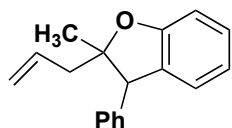

**(6) 2-allyl-2-methyl-3-phenyl-2,3-dihydrobenzofuran** was synthesized according to general procedure D, ((2-(pent-4-en-2-yloxy)phenyl)(phenyl)methylene)hydrazine (0.550 g, 1.96 mmol), manganese(IV) dioxide (1.35 g, 15.68 mmol),  $\text{Rh}_2(\text{R-PTAD})_4$  (0.031 g, 0.0196 mmol), and anhydrous  $\text{CH}_2\text{Cl}_2$  (130.7 mL) were used. After filtration, the mixture

was purified by flash column chromatography (10:90, EtOAc:hexanes) affording dihydrobenzofuran **6** as a light yellow oil (0.338 g, 77%):

NMR reported is with  $\text{Rh}_2(\text{R-PTAD})_4$  and racemic SM yielding a 47:53 dr (trans:cis). The peaks reported are the major diastereomer of the mixture of two diastereomers, that couldn't be separate by flash column chromatography or prep-TLC. The singlets at 4.49 and 4.41 are the double benzylic protons at the former carbene center, and used to determine the dr.

$^1\text{H}$  NMR (600 MHz,  $\text{CDCl}_3$ )  $\delta$  7.35 – 7.22 (m, 7H), 7.18 (dt,  $J = 7.9, 4.0$  Hz, 2H), 7.12 (d,  $J = 7.2$  Hz, 2H), 7.09 – 6.97 (m, 4H), 6.91 – 6.81 (m, 4H), 6.01 – 5.90 (m, 1H, minor diastereomer), 5.80 – 5.70 (m, 1H, major diastereomer), 5.25 – 5.18 (m, 2H, minor diastereomer), 5.01 (d,  $J = 10.2$  Hz, 1H, major diastereomer), 4.89 (dd,  $J = 17.0, 2.0$  Hz, 1H, major diastereomer), 4.49 (s, 1H, minor diastereomer), 4.41 (s, 1H, major diastereomer), 2.63 – 2.53 (m, 2H, minor diastereomer), 2.23 (dd,  $J = 14.4, 6.2$  Hz, 1H, major diastereomer), 1.67 (dd,  $J = 14.3, 8.2$  Hz, 1H, major diastereomer), 1.54 (s, 4H, major diastereomer), 0.96 (s, 3H, minor diastereomer);  $^{13}\text{C}$  NMR (150 MHz,  $\text{CDCl}_3$ )  $\delta$  159.05, 139.16, 133.85, 130.60, 129.43, 128.76, 128.53, 127.39, 126.02, 120.65, 118.23, 110.14, 109.86, 91.00, 77.48, 77.16, 76.84, 59.12, 41.41, 25.94, 0.15; IR (thin film) 3028, 2976, 1640, 1596  $\text{cm}^{-1}$ ; AMM (ESI)  $m/z$  calcd for  $\text{C}_{18}\text{H}_{18}\text{O}_2^+[\text{M}+\text{H}]^+$  251.1431 found 251.1429.

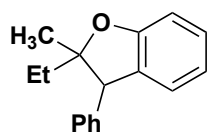

**(21) 2-ethyl-2-methyl-3-phenyl-2,3-dihydrobenzofuran** was synthesized according to general procedure D, ((2-(*sec*-butoxy)phenyl)(phenyl)methylene)hydrazine (0.025 g, 0.093 mmol), manganese(IV) dioxide (0.064 g, 0.744 mmol),  $\text{Rh}_2(\text{S-PTAD})_4$  (0.0015 g, 0.00097 mmol), and anhydrous  $\text{CH}_2\text{Cl}_2$  (6.2 mL) were used. The filtered mixtures was purified by flash column chromatography (05:95, EtOAc:hexanes) affording insertion **21** as a clear oil (0.020 g, 91%):

NMR reported is with a catalyst yielding a 46:54 dr. The peaks reported are a mixture of two diastereomers, that couldn't be separate by flash column chromatography or prep-TLC. The singlets at 4.42 and 4.37 are the double benzylic protons at the former carbene center, and used to determine the dr.

$^1\text{H}$  NMR (400 MHz,  $\text{CDCl}_3$ )  $\delta$  7.27 (ddt,  $J = 14.1, 12.5, 4.6$  Hz, 7H), 7.18 (t,  $J = 7.7$  Hz, 2H), 7.08 (ddd,  $J = 7.7, 6.1, 1.6$  Hz, 4H), 7.02 (dd,  $J = 7.4, 6.0$  Hz, 3H), 6.89 – 6.80 (m, 4H), 4.42 (s, 1H), 4.37 (s, 1H), 1.95 – 1.79 (m, 2H), 1.53 (s, 4H), 1.46 (dt,  $J = 14.6, 7.3$  Hz, 1H), 1.06 (t,  $J = 7.4$  Hz, 3H), 1.03 – 0.97 (m, 1H), 0.93 (s, 3H), 0.83 (t,  $J = 7.4$  Hz, 4H);  $^{13}\text{C}$  NMR (100 MHz,  $\text{CDCl}_3$ )  $\delta$  159.38, 159.15, 140.29, 139.59, 130.99, 130.61, 129.40, 129.36, 128.67, 128.65, 128.42, 128.37, 127.17, 127.11, 126.13, 126.05, 120.47, 120.42, 110.02, 109.78, 92.43, 91.99, 77.48, 77.36, 77.16, 76.84, 59.21, 56.32, 34.47, 29.85, 29.44, 25.08, 22.13, 8.47, 8.33; IR (thin film) 2973, 1597, 1478  $\text{cm}^{-1}$ ; AMM (ESI)  $m/z$  calcd for  $\text{C}_{17}\text{H}_{18}\text{O}_2^+[\text{M}+\text{H}]^+$  239.1431 found 239.1426.

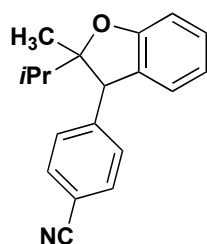

**(25) 4-(2-isopropyl-2-methyl-2,3-dihydrobenzofuran-3-yl)benzonitrile** was synthesized according to general procedure D, 4-(hydrazineylidene(2-((3-methylbutan-2-yl-oxy)phenyl)methyl)benzonitrile (0.030 g, 0.098 mmol), manganese(IV) dioxide (0.067 g, 0.781 mmol),  $\text{Rh}_2(\text{mes})_4$  (0.00084 g, 0.00098 mmol), and anhydrous  $\text{CH}_2\text{Cl}_2$  (6.5 mL) were used. After filtration, the mixtures was purified by preparative TLC (10:90 EtOAC:Hexanes, SiliaPlate<sup>TM</sup> Preparative, 1,000  $\mu\text{m}$ , 20 x 20 cm, with F254 indicator) affording dihydrobenzofuran **25** as a light yellow oil (0.019 g, 70%):

NMR reported is with the  $\text{Rh}_2(\text{mes})_4$  catalyst yielding a 81:19 dr. The peaks reported are a mixture of two diastereomers that couldn't be separate by flash column chromatography or prep-TLC; with the major diastereomer peaks reported. The singlets

at 4.54 and 4.13 are the double benzylic protons at the former carbene center, for each the major and minor diastereomer respectively.

$^1\text{H}$  NMR (600 MHz,  $\text{CDCl}_3$ )  $\delta$  7.60 – 7.57 (m, 2H), 7.54 – 7.52 (m, 1H), 7.23 – 7.18 (m, 1H), 7.14 (d,  $J$  = 8.1 Hz, 2H), 6.94 – 6.90 (m, 1H), 6.85 (ddd,  $J$  = 9.1, 7.6, 1.4 Hz, 2H), 4.54 (s, 1H), 2.08 (p,  $J$  = 6.8 Hz, 1H), 1.07 (d,  $J$  = 6.8 Hz, 3H), 1.02 (d,  $J$  = 6.9 Hz, 4H), 0.90 (s, 3H);  $^{13}\text{C}$  NMR (101 MHz,  $\text{CDCl}_3$ )  $\delta$  158.44, 146.48, 132.43, 132.06(2), 130.24(2), 129.32, 129.16, 125.82, 121.03, 110.72, 109.76, 94.61, 77.48, 77.36, 77.16, 76.84, 31.73, 19.99, 18.31, 17.61; IR (thin film) 2965, 2228, 1597, 1480  $\text{cm}^{-1}$ ; AMM (ESI)  $m/z$  calcd for  $\text{C}_{19}\text{H}_{19}\text{NO}^+[\text{M}+\text{H}]^+$  278.1540 found 278.1539.

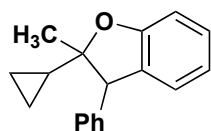

**(24) 2-cyclopropyl-2-methyl-3-phenyl-2,3-dihydrobenzofuran** was synthesized according to general procedure D, ((2-(1-cyclopropylethoxy)phenyl)(phenyl)methylene) hydrazine (0.025 g, 0.089 mmol), manganese(IV) dioxide (0.061 g, 0.712 mmol),  $\text{Rh}_2(\text{mes})_4$  (0.00080 g, 0.00089 mmol), and anhydrous  $\text{CH}_2\text{Cl}_2$  (5.9 mL) were used. After filtration, the mixtures was purified by flash column chromatography (05:95 EtOAc:Hexanes) affording dihydrobenzofuran **24** as a clear oil (0.099 g, 44%):

NMR reported is with the  $\text{Rh}_2(R\text{-PTAD})_4$  catalyst yielding a 15:85 dr. The peaks reported are a mixture of two diastereomers, that couldn't be separate by flash column chromatography or prep-TLC. The singlets at 4.64 and 4.52 are the double benzylic protons at the former carbene center, for each the minor and major diastereomer respectively with the peaks for the major diastereomer reported below.

$^1\text{H}$  NMR (600 MHz,  $\text{CDCl}_3$ )  $\delta$  7.35 – 7.23 (m, 8H), 7.23 – 7.12 (m, 8H), 7.07 – 7.00 (m, 2H), 6.89 – 6.83 (m, 3H), 6.83 – 6.73 (m, 3H), 4.64 (s, 0.32H), 4.52 (s, 1H), 1.53 (s, 3H), 1.34 – 1.22 (m, 1H), 0.91 – 0.86 (m, 4H), 0.59 – 0.47 (m, 4H), 0.39 – 0.27 (m, 5H), 0.19 – 0.06 (m, 4H);  $^{13}\text{C}$  NMR (151 MHz,  $\text{CDCl}_3$ )  $\delta$  159.80, 139.70, 130.76, 129.71, 129.43,

128.68, 128.43, 128.18, 127.09, 125.94, 120.45, 109.43, 90.66, 59.49, 26.70, 17.55, 2.35, 0.94; IR (thin film) 3458, 3009, 1477  $\text{cm}^{-1}$ ; AMM (ESI)  $m/z$  calcd for  $\text{C}_{18}\text{H}_{18}\text{O}^+[\text{M}-\text{H}]$  248.9616 found 248.9616.

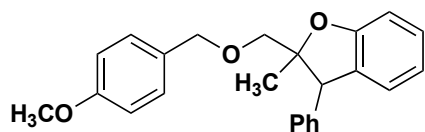

**(26) 2-(((4-methoxybenzyl)oxy)methyl)-2-methyl-3-phenyl-2,3-dihydrobenzofuran**

was synthesized according to general procedure D, (2-((1-((4-methoxybenzyl)oxy)propan-2-yl)oxy)phenyl)(phenyl)methylene)hydrazine (0.025 g, 0.064 mmol), manganese(IV) dioxide (0.044 g, 0.512 mmol),  $\text{Rh}_2(\text{R-PTAD})_4$  (0.001 g, 0.00064 mmol), and anhydrous  $\text{CH}_2\text{Cl}_2$  (4.3 mL) were used. After filtration, the mixture was purified by flash column chromatography (20:80 EtOAc:Hexanes) affording dihydrobenzofuran **26** as a clear oil (0.019 g, 84%, 44:56 dr):

NMR reported is with the  $\text{Rh}_2(\text{R-PTAD})_4$  catalyst yielding a 44:56 dr. The peaks reported are a mixture of two diastereomers, that couldn't be separated by flash column chromatography or prep-TLC. The singlets at 4.67 and 4.39 are the double benzylic protons at the former carbene center, for each the minor and major diastereomer respectively with the peaks for the major and minor diastereomers reported below (the aryl protons are overlapping and therefore can't be assigned clearly to the major or minor diastereomers).

$^1\text{H}$  NMR (400 MHz,  $\text{CDCl}_3$ )  $\delta$  7.31 – 7.23 (m, 8H), 7.22 – 7.16 (m, 2H), 7.10 – 7.00 (m, 7H), 6.92 – 6.84 (m, 5H), 6.82 – 6.77 (m, 2H), 4.67 (s, 1H, minor diastereomer), 4.64 – 4.54 (m, 2H, minor diastereomer), 4.39 (s, 1H, major diastereomer), 4.22 (d,  $J = 11.6$  Hz, 1H, major diastereomer), 4.05 (d,  $J = 11.6$  Hz, 1H, major diastereomer), 3.81 (s, 2H, minor diastereomer), 3.78 (s, 3H, major diastereomer), 3.59 (s, 2H, minor diastereomer), 3.26 (d,  $J = 10.0$  Hz, 1H, major diastereomer), 3.00 (d,  $J = 10.0$  Hz, 1H, major diastereomer), 1.62 (s, 3H, major diastereomer), 0.96 (s, 2H, minor diastereomer).

$^{13}\text{C}$  NMR (100 MHz,  $\text{CDCl}_3$ )  $\delta$  59.36, 159.28, 159.13, 159.08, 139.84, 138.96, 130.48, 130.45, 130.37, 130.17, 129.49, 129.48, 129.36, 129.13, 128.78, 128.63, 128.40, 128.30, 127.28, 127.14, 126.21, 125.88, 120.80, 120.75, 113.92, 113.68, 110.15, 109.94, 91.35, 90.49, 77.48, 77.16, 76.84, 75.04, 73.37, 73.23, 72.98, 57.72, 55.43, 55.38, 53.38, 24.67, 20.58, 0.14.; IR (thin film) 3003, 1476, 1459  $\text{cm}^{-1}$ ; AMM (ESI)  $m/z$  calcd for  $\text{C}_{24}\text{H}_{24}\text{O}_3\text{Na}$   $[\text{M}+\text{Na}]^+$  383.1623 found 383.1619.

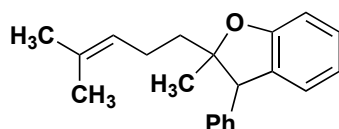

**(27) 2-methyl-2-(4-methylpent-3-en-1-yl)-3-phenyl-2,3-dihydrobenzofuran** was synthesized according to general procedure D, ((2-((6-methylhept-5-en-2-yl)oxy)phenyl)(phenyl)methylene)hydrazine (0.025 g, 0.078 mmol), manganese(IV) dioxide (0.053 g, 0.620 mmol),  $\text{Rh}_2(\text{S-PTAD})_4$  (0.0001 g, 0.0078 mmol), and anhydrous  $\text{CH}_2\text{Cl}_2$  (5.2 mL) were used. After filtration, the mixtures was purified by flash column chromatography (10:90 EtOAc:Hexanes) affording dihydrobenzofuran **27** as a clear oil (0.016 g, 68%):

NMR reported is with the  $\text{Rh}_2(\text{S-PTAD})_4$  catalyst yielding a 39:61 dr. The peaks reported are a mixture of two diastereomers, that couldn't be separate by flash column chromatography or prep-TLC. The singlets at 4.45 and 4.37 are the double benzylic protons at the former carbene center, for each the minor and major diastereomer respectively with the peaks for the major diastereomer reported below.

$^1\text{H}$  NMR (400 MHz,  $\text{CDCl}_3$ )  $\delta$  7.57 – 7.50 (m, 1H), 7.34 – 7.22 (m, 6H), 7.21 – 7.15 (m, 2H), 7.09 (ddt,  $J = 9.5, 7.8, 1.6$  Hz, 4H), 7.03 (ddd,  $J = 7.6, 2.9, 1.5$  Hz, 2H), 6.85 (tt,  $J = 8.0, 2.5$  Hz, 4H), 5.15 (t,  $J = 7.1$  Hz, 1H, minor diastereomer), 4.85 (t,  $J = 7.1$  Hz, 1H, major diastereomer), 4.45 (s, 1H, minor diastereomer), 4.37 (s, 1H, major diastereomer), 2.29 – 2.15 (m, 2H, minor diastereomer), 2.12 – 1.99 (m, 1H), 1.96 – 1.78 (m, 3H), 1.69 (d,  $J = 1.5$  Hz, 2H), 1.62 (d,  $J = 1.3$  Hz, 1H), 1.57 (s, 6H, major diastereomer), 1.55 (s, 1H), 1.47 (s, 4H), 1.09 – 0.98 (m, 1H), 0.95 (s, 2H, minor



diastereomer);  $^{13}\text{C}$  NMR (101 MHz,  $\text{CDCl}_3$ )  $\delta$  159.36, 159.11, 140.10, 139.39, 132.10, 131.53, 131.00, 130.73, 130.50, 129.41(2), 129.36(2), 128.69, 128.64, 128.45(2), 128.40(2), 127.21, 127.16, 126.13, 126.01, 124.35, 124.04, 120.48, 120.45, 110.04, 109.84, 92.00, 91.70, 77.48, 77.16, 76.84, 59.35, 56.89, 41.88, 36.57, 25.84, 25.75, 22.81, 22.73, 17.83, 17.67, 0.15; IR (thin film) 3028, 2970, 1597, 1478  $\text{cm}^{-1}$ ; AMM (ESI)  $m/z$  calcd for  $\text{C}_{21}\text{H}_{24}\text{O}^+[\text{M}+\text{H}]^+$  293.1900 found 293.1903.

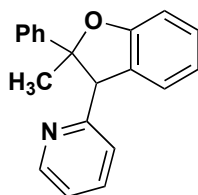

**(23) 2-(2-methyl-2-phenyl-2,3-dihydrobenzofuran-3-yl)pyridine** was synthesized according to general procedure D, 3-(hydrazineylidene(2-(1-phenylethoxy)phenyl)methyl)pyridine (0.015 g, 0.047 mmol), manganese(IV) dioxide (0.033 g, 0.328 mol),  $\text{Rh}_2(\text{R-PTAD})_4$  (0.00073 g, 0.00047 mmol) with anhydrous DCM (3.1 mL). After filtration, the crude product was purified by flash column chromatography (40:60, EtOAc:hexanes) affording dihydrobenzofuran **23** as a light yellow oil (0.013 g, 96%): All catalysts screened ( $\text{Rh}_2(\text{R-PTAD})_4$ ,  $\text{Rh}_2(\text{S-PTAD})_4$ ,  $\text{Rh}_2(\text{mes})_4$ ) yielded >95:5 dr of the same, single diastereomer.  $^1\text{H}$  NMR (400 MHz,  $\text{CDCl}_3$ )  $\delta$  8.30 – 8.21 (m, 1H), 8.18 (s, 1H), 7.33 – 7.24 (m, 2H), 7.12 – 6.99 (m, 6H), 6.92 (dtd,  $J = 15.6, 7.4, 1.3$  Hz, 2H), 6.88 – 6.77 (m, 2H), 4.64 (s, 1H), 1.96 (s, 3H);  $^{13}\text{C}$  NMR (100 MHz,  $\text{CDCl}_3$ )  $\delta$  159.26, 150.16, 148.24, 141.65, 136.43, 136.00, 129.96, 129.36, 127.89(2), 126.96, 125.93(2), 125.86, 122.96, 121.37, 110.15, 93.33, 58.27, 29.25; IR (thin film) 2985, 1738, 1372  $\text{cm}^{-1}$ ; AMM (ESI)  $m/z$  calcd for  $\text{C}_{20}\text{H}_{17}\text{NO}^+[\text{M}+\text{H}]^+$  287.1310 found 288.1380.

## Crystal Structure Substrates

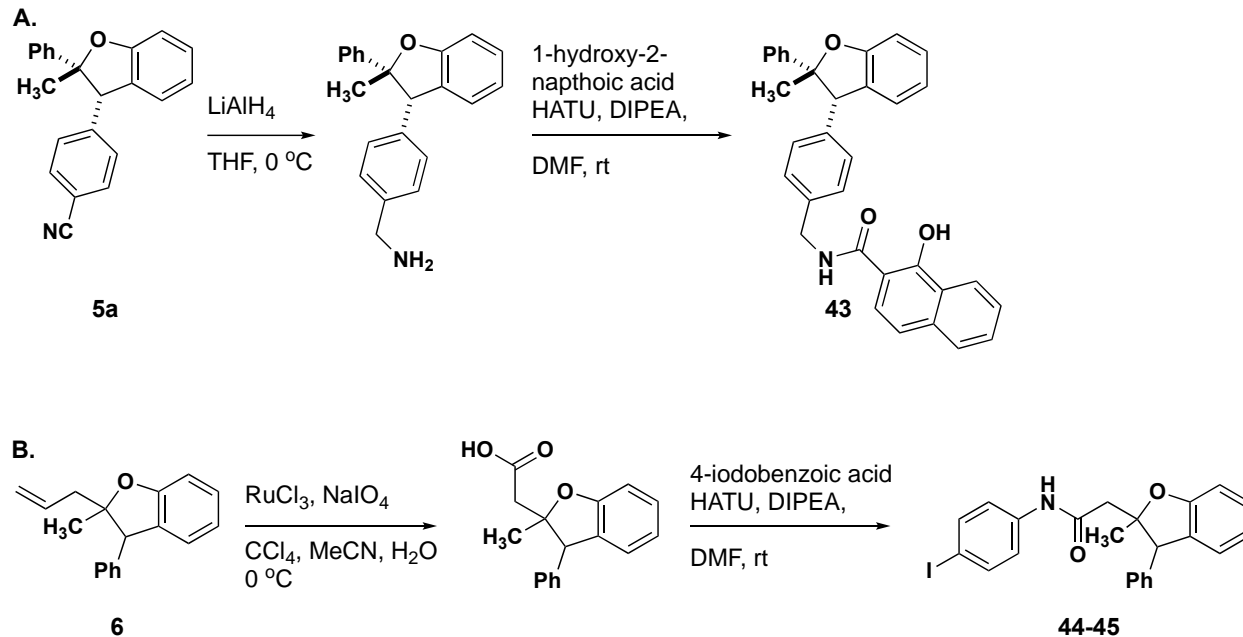

**SI Figure 2.** A. Synthesis of **33** from insertion product **5a** B. Synthesis of **34** and **35** from insertion product **6**.

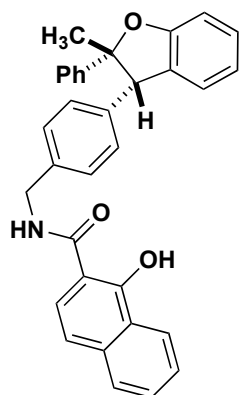

**(43)** **1-hydroxy-N-(4-((2R,3S)-2-methyl-2-phenyl-2,3-dihydrobenzofuran-3-yl)benzyl)-2-naphthamide** was synthesized over two steps. First, following a modified literature procedure<sup>5</sup>, lithium aluminum hydride (0.228g, 6.00 mmol, 6.0 equiv) was added to a flame dried round bottom under Ar charged with THF (6.0 mL, 0.1M). The solution was cooled to 0 °C, then a solution of enantiopure **5a** (0.313g, 1.00 mmol, 1.0 equiv) in THF (10.0 mL, 0.1M) was added dropwise. The reaction was stirred for 12 hours while being allowed to warm to room temperature. The solution was cooled back down to 0 °C

and 0.228 mL of H<sub>2</sub>O then 0.228 mL of 15% NaOH(aq) then 0.684 mL of H<sub>2</sub>O were added sequentially. The mixture was stirred at room temperature for 15 minutes, then dried over Mg<sub>2</sub>SO<sub>4</sub>, filtered, and concentrated to afford the primary amine **36** as a light yellow oil and a single diastereomer (0.267g, 85%, >95:5 dr). The compound wasn't purified forward and carried straight through to the next reaction.

Second, 1-hydroxy-2-naphthoic acid (0.107g, 0.571 mmol, 1.2 equiv), HATU (0.221g, 0.571 mmol, 1.2 equiv), DIPEA (0.176 mL, 1.05 mmol, 2.2 equiv), and DMF (4.76 mL, 0.1M) were added to a flame dried round bottom under Ar and stirred for 10 minutes. Amine intermediate (0.150g, 0.476 mmol, 1.0 equiv) was added and the reaction was stirred overnight. The reaction was diluted in CH<sub>2</sub>Cl<sub>2</sub> (10 mL), washed with brine (10 mL x 3), dried over Na<sub>2</sub>SO<sub>4</sub>, and concentrated. The mixture was purified by flash column chromatography (30:70 CH<sub>2</sub>Cl<sub>2</sub>:Hexanes) to yield a single diastereomer and single enantiomer of **43** as a white solid (0.113g, 49%). **43** was recrystallized from a mixture of CH<sub>2</sub>Cl<sub>2</sub> and Hexanes to afford the crystal structure reported. mp 84-85 °C; <sup>1</sup>H NMR (600 MHz, CDCl<sub>3</sub>) δ 13.74 (s, 1H), 8.42 (d, *J* = 7.3 Hz, 1H), 7.73 (d, *J* = 8.1 Hz, 1H), 7.57 (ddd, *J* = 8.2, 6.9, 1.3 Hz, 1H), 7.52 (ddd, *J* = 8.2, 6.8, 1.3 Hz, 1H), 7.27 – 7.19 (m, 3H), 7.06 – 6.97 (m, 8H), 6.97 – 6.92 (m, 1H), 6.87 (td, *J* = 7.4, 1.1 Hz, 1H), 6.72 (d, *J* = 7.8 Hz, 2H), 6.38 (t, *J* = 5.7 Hz, 1H), 4.63 (s, 1H), 4.49 (d, *J* = 5.5 Hz, 2H), 1.92 (s, 3H); <sup>13</sup>C NMR (150 MHz, CDCl<sub>3</sub>) δ 170.32, 160.75, 159.09, 142.00, 139.75, 136.28, 135.77, 130.74, 129.65(2), 128.94, 128.86, 127.38, 127.34(2), 127.30(2), 127.28, 126.46, 125.90(2), 125.83, 125.67, 123.87, 120.98, 120.64, 118.14, 109.80, 106.43, 93.30, 60.54, 43.33, 29.31; IR (thin film) 3432, 3056, 2975, 1620, 1595 cm<sup>-1</sup>; AMM (ESI) *m/z* calcd for C<sub>33</sub>H<sub>27</sub>NO<sub>3</sub><sup>+</sup>[M+H]<sup>+</sup> 485.1991, found 486.2060. [ $\alpha$ ]<sub>D</sub><sup>23</sup> = +7.88 (c = 0.38, CHCl<sub>3</sub>).

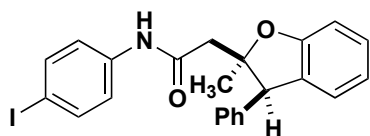

**(44) Cis-N-(4-iodophenyl)-2-(2-methyl-3-phenyl-2,3-dihydrobenzofuran-2-yl)acetamide** was synthesized over two steps following the prep below. mp 130-132 °C; <sup>1</sup>H NMR (600 MHz, CDCl<sub>3</sub>) δ 8.06 (s, 1H), 7.61 (d, *J* = 8.3 Hz, 2H), 7.34 – 7.27 (m, 6H), 7.12 (d, *J* = 7.4 Hz, 1H), 7.07 (d, *J* = 7.2 Hz, 2H), 7.00 – 6.92 (m, 2H), 4.48 (s, 1H), 2.52

(d,  $J = 14.9$  Hz, 1H), 1.95 (d,  $J = 15.0$  Hz, 1H), 1.72 (s, 3H);  $^{13}\text{C}$  NMR (100 MHz,  $\text{CDCl}_3$ )  $\delta$  168.64, 157.71, 138.16, 138.01(2), 137.81, 129.76, 129.23(2), 129.21, 128.92(2), 128.00, 126.44, 121.95, 121.89(2), 110.27, 89.97, 87.33, 77.48, 77.16, 76.84, 59.39, 45.86, 25.84; IR (thin film) 3314, 2975, 1667, 1585  $\text{cm}^{-1}$ ; AMM (ESI)  $m/z$  calcd for  $\text{C}_{23}\text{H}_{20}\text{INO}_2^+[\text{M}+\text{H}]^+$  470.0612, found 470.0608.  $[\alpha]_D^{23} = +13.7$  ( $c = 0.18$ ,  $\text{CHCl}_3$ ).

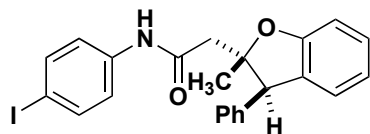

**(45) Trans-N-(4-iodophenyl)-2-(2-methyl-3-phenyl-2,3-dihydrobenzofuran-2-yl)acetamide** was synthesized over two steps following the prep below. mp 144-145  $^{\circ}\text{C}$ ;  $^1\text{H}$  NMR (600 MHz,  $\text{CDCl}_3$ )  $\delta$  8.17 (s, 1H), 7.60 (d,  $J = 8.2$  Hz, 2H), 7.36 – 7.28 (m, 3H), 7.28 – 7.22 (m, 3H), 7.15 (d,  $J = 7.4$  Hz, 2H), 7.09 (d,  $J = 7.5$  Hz, 1H), 6.98 – 6.90 (m, 2H), 4.60 (s, 1H), 2.96 (d,  $J = 14.8$  Hz, 1H), 2.85 (d,  $J = 14.9$  Hz, 1H), 1.06 (s, 3H);  $^{13}\text{C}$  NMR (100 MHz,  $\text{CDCl}_3$ )  $\delta$  168.12, 157.76, 138.15, 138.04(2), 137.64, 129.77, 129.34(2), 129.14, 128.74(2), 127.76, 126.54, 121.95(2), 121.92, 110.12, 90.49, 87.57, 56.78, 49.10, 22.48; IR (thin film) 3269, 2926, 1704, 1597  $\text{cm}^{-1}$ ; AMM (ESI)  $m/z$  calcd for  $\text{C}_{23}\text{H}_{20}\text{INO}_2^+[\text{M}+\text{H}]^+$  470.0612, found 470.0608.  $[\alpha]_D^{23} = +23.1$  ( $c = 0.17$ ,  $\text{CHCl}_3$ ).

First following a literature procedure<sup>6</sup>, **(6)** 2-allyl-2-methyl-3-phenyl-2,3-dihydrobenzofuran (0.250g, 0.998 mmol, 1.0 equiv) (derived from enantiopure starting material, and insertion catalyzed by  $\text{Rh}_2(\text{R-PTAD})_4$ ) was added to a solution of carbon tetrachloride (10 mL, 0.1M) in a round bottom. Then acetonitrile (10 mL, 0.1M) and  $\text{H}_2\text{O}$  (15 mL, 0.07M) were added sequentially. The mixture was cooled down to 0  $^{\circ}\text{C}$  then  $\text{NaIO}_4$  (1.06g, 4.99 mmol, 5.0 equiv) was added.  $\text{RuCl}_3$  (0.0207g, 0.0998 mmol, 0.1 equiv) was added portionwise, then the reaction was stirred overnight while allowing it to warm to room temperature. The reaction was quenched with 2M  $\text{NaOH}(\text{aq})$  (5 mL) and extracted with  $\text{CH}_2\text{Cl}_2$  (10 mL x 1). The aqueous layer was acidified with 1M  $\text{HCl}$  until a pH <1 was reached, then extracted with  $\text{CH}_2\text{Cl}_2$  (10 mL x 3). The organic layers were combined, dried over  $\text{Na}_2\text{SO}_4$ , and concentrated. The mixture was purified by flash column chromatography (90:9.8:0.2 EtOAc:Hex:AcOH) affording carboxylic acid as a clear oil and mixture of diastereomers (0.119g, 44%, 85:15 dr trans:cis).

Second, carboxylic acid was added to a solution of HATU (0.170g, 0.448 mmol, 1.2 equiv), DIPEA (0.137 mL, 0.821 mmol, 2.2 equiv) in CH<sub>2</sub>Cl<sub>2</sub> (0.1M). The reaction was stirred for 15 minutes, then 4-iodobenzoic acid (0.105g, 0.448 mmol, 1.2 equiv) was added. The reaction was stirred overnight, then diluted in CH<sub>2</sub>Cl<sub>2</sub> and washed with brine (5 mL x 3). The organic layer was dried over Na<sub>2</sub>SO<sub>4</sub> and concentrated to yield a mixture of diastereomers of amides **44** & **45** (yield = 29%). The mixture was purified and diastereomers separated by flash column chromatography (90:10 EtOAc:Hex) affording minor cis diastereomer **44** as a white solid (0.0085g, 5%) and major trans diastereomer **45** as a white solid (0.043, 25%). These enantiomerically pure diastereomers were then recrystallized in a mixture of CH<sub>2</sub>Cl<sub>2</sub>:Hexanes to afford the crystal structures reported.

## References

- 1) C. Soldi, K. N. Lamb, R. A. Squitieri, M. González-López, M. J. Di Maso, J. T. Shaw, *J. Am. Chem. Soc.* **2014**, 136, 15142-15145
- 2) Curini, M.; Epifano, F.; Marcotullio, M.C.; Montanari, F. *Synlett*, **2004**, 2, 368-370.
- 3) Pilli, R.A.; Victor, M.M.; De Meijere, A. *J. Org. Chem.* **2000**, 65(19), 5915-5916
- 4) Niu, T.; Wang, K.-H.; Huang, D.; Xu, C.; Su, Y.; Hu, Y.; Fu, Y. *Synthesis* **2013**, 46, 320-330.
- 5) Bernardes, G.J.L; Casi, G.; Trussel, S.; Hartmann, I.; Schwager, K.; Scheuermann, J.; Neri, D. *Angew. Chem. Int.* **2012**, 51, 941-944.
- 6) Murakata, M.; Ikeda, T. *Org. Biomol. Chem.* **2017**, 15, 6632-6639.

**SI Table 1: Catalyst Screen**

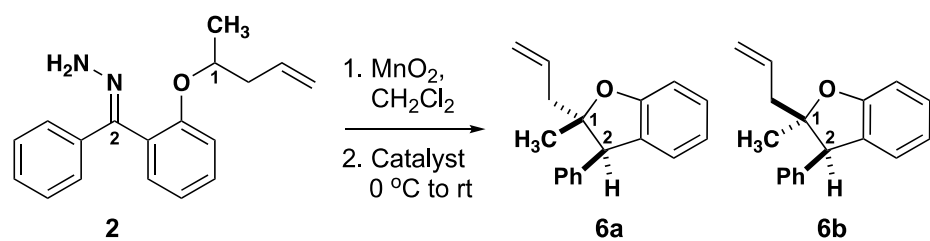

| Catalyst                          | yield | dr <sup>a</sup> | er <sup>b</sup> |       |
|-----------------------------------|-------|-----------------|-----------------|-------|
| $\text{Rh}_2(\text{R-PTAD})_4$    | 70%   | 47:53           | 91:09           | 86:14 |
| $\text{Rh}_2(\text{R-TCP TTL})_4$ | 31%   | 57:43           | 76:24           | 85:15 |
| $\text{Rh}_2(\text{R-DOSP})_4$    | 15%   | 60:40           | 39:61           | 37:63 |
| <b>S-46</b>                       | 70%   | 49:51           | 49:51           | 48:52 |
| $\text{Rh}_2(\text{4S-MPPIM})_4$  | NR    | NR              | NR              | NR    |
| $\text{Rh}_2(\text{esp})_4$       | 77%   | 43:57           | 02:98           | 13:87 |
| <b>S-47</b>                       | 78%   | 52:48           | 48:52           | 47:53 |

<sup>a</sup> dr determined by  $^1\text{H}$  NMR analysis of unpurified reaction mixtures. <sup>b</sup> er determined by chiral HPLC

**Catalyst structures**

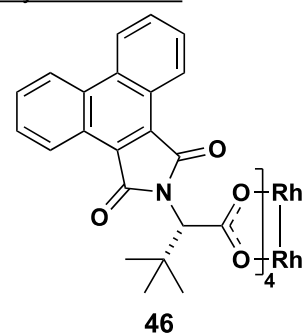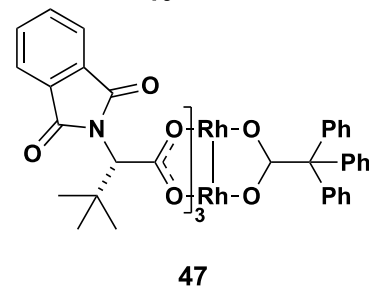

**SI Table 2: Solvent Screen**

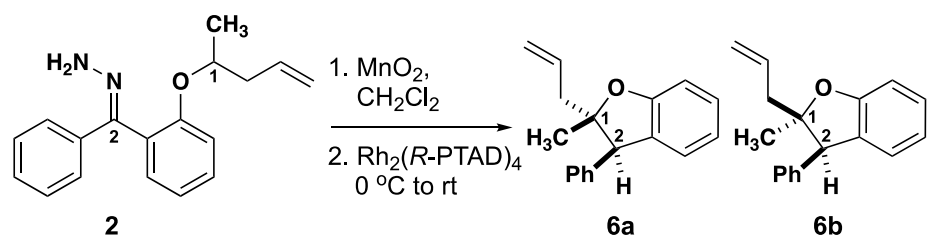

| Solvent     | yield | dr <sup>a</sup> | er <sup>b</sup> |       |
|-------------|-------|-----------------|-----------------|-------|
| Pentane     | 29%   | 50:50           | 86:14           | 83:17 |
| Cyclohexane | 9%    | 51:49           | 83:17           | 89:11 |
| Benzene     | 42%   | 42:58           | 92:08           | 88:12 |
| DCM         | 70%   | 47:53           | 91:09           | 86:14 |
| DCE         | 21%   | 52:48           | 91:09           | 90:10 |
| MeCN        | 23%   | 54:46           | 82:18           | 85:15 |
| DMF         | 24%   | 51:49           | 84:16           | 83:17 |
| IPA         | 32%   | 48:52           | 91:09           | 87:13 |

<sup>a</sup> dr determined by  $^1\text{H}$  NMR analysis of unpurified reaction mixtures. <sup>b</sup> er determined by chiral HPLC

### SI Table 3: Temperature Screen

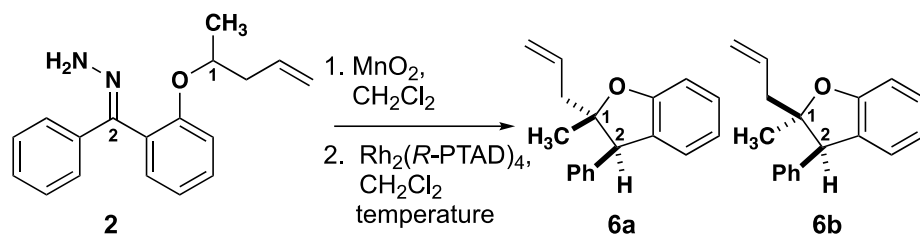

| Temperature (°C) | yield | dr <sup>a</sup> | er <sup>b</sup> |       |
|------------------|-------|-----------------|-----------------|-------|
| -27 °C           | 45%   | 46:54           | 91:09           | 84:16 |
| -10 °C           | 38%   | 46:54           | 92:08           | 87:13 |
| 0 °C to 23 °C    | 70%   | 47:53           | 91:09           | 86:14 |
| 23 °C            | 42%   | 46:54           | 90:10           | 83:17 |
| 60 °C            | 16%   | 57:43           | 80:20           | 81:19 |

<sup>a</sup> dr determined by <sup>1</sup>H NMR analysis of unpurified reaction mixtures. <sup>b</sup> er determined by chiral HPLC

**HPLC Sample Preparation:** Approximately 4-5 mgs of the compound to be analyzed was weighed into a vial. The sample was dissolved in a mixture of 10% isopropanol/hexanes solution such that the concentration was 1 mg/mL. About 1 mL of the solution was taken up in a syringe and passed through a 0.2 micron syringe filter into a 1.5 mL HPLC vial.

**HPLC Methods and Materials:** Enantiomer ratios were determined by chiral HPLC with one of the following columns (denoted as AD, AS, or OD on individual HPLC traces): AD = Phenomenex Lux<sup>®</sup>, 5  $\mu$ m Amylose-1 LC Column, 250x4.6mm, part #: 00G-4732-E0; AS = Daicel Chiralpak<sup>®</sup>, AS-H 5  $\mu$ m, 250x4.6mm, column #: ASH0CE-LF002; OD = Phenomenex Lux<sup>®</sup>, 5  $\mu$ m Cellulose-1 LC Column, 250x4.6mm, part #: 00G-4459-E0. Isocratic solvent mixture (hexanes: isopropanol), flow rate, injection volume, and analysis-wavelength are denoted on individual HPLC traces.

Note: unless otherwise specified, 1mL/min is the default HPLC method flow-rate.



### ==== HPLC Analysis Report ====

C:\LabSolutions\Training1107\Sarah Dishman\SND-1-050-AS0-100\_1.0mL.lcd  
 Acquired by : Admin  
 Sample Name : 1  
 Sample ID : 1  
 Tray# : 1  
 Vial # : 101  
 Injection Volume : 1 uL  
 Data File Name : SND-1-050-AS0-100\_1.0mL.lcd  
 Method File Name : AS-0\_100\_40min.lcm  
 Batch File Name : 04-10-19.lcb  
 Report File Name : UCD Default.lcr  
 Data Acquired : 4/10/2019 11:02:29 AM  
 Data Processed : 4/10/2019 3:02:48 PM

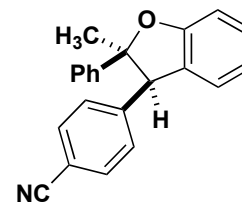

**5a**  
 Enantiopure SM  
 Enantiopure Pdt  
 Rh<sub>2</sub>(mes)<sub>4</sub>

#### <Chromatogram>

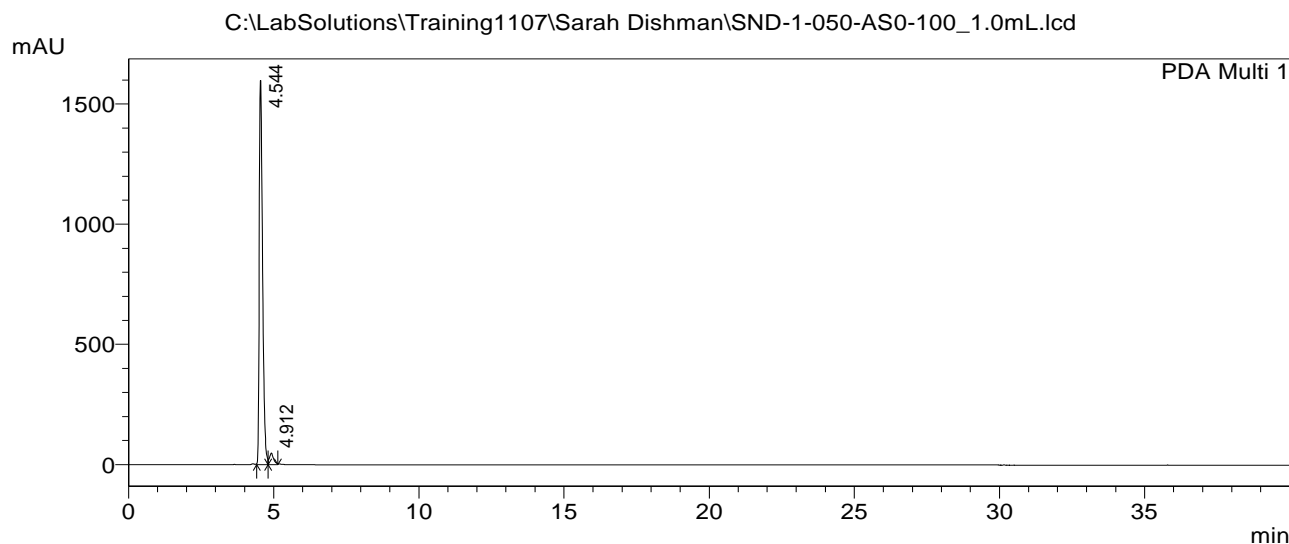

#### < Peak Table >

PeakTable C:\LabSolutions\Training1107\Sarah Dishman\SND-1-050-AS0-100\_1.0mL.lcd

PDA Ch1 235nm 4nm

| Peak# | Ret. Time | Area     | Height  | Area %  | Height % |
|-------|-----------|----------|---------|---------|----------|
| 1     | 4.544     | 12654278 | 1597376 | 96.351  | 97.099   |
| 2     | 4.912     | 479254   | 47732   | 3.649   | 2.901    |
| Total |           | 13133532 | 1645108 | 100.000 | 100.000  |

==== HPLC Analysis Report ====

C:\LabSolutions\Training1107\Sarah Dishman\SND-1-048-AS0-100\_1.0mL.lcd  
 Acquired by : Admin  
 Sample Name : 1  
 Sample ID : 1  
 Tray# : 1  
 Vial # : 85  
 Injection Volume : 2 uL  
 Data File Name : SND-1-048-AS0-100\_1.0mL.lcd  
 Method File Name : AS-0\_100\_40min.lcm  
 Batch File Name : 04-10-19\_SND-048,049.lcb  
 Report File Name : UCD Default.lcr  
 Data Acquired : 4/10/2019 8:19:02 PM  
 Data Processed : 4/10/2019 8:59:05 PM

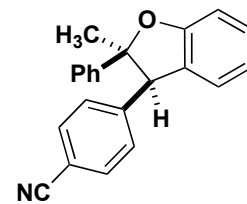

**5a**

Enantiopure SM  
 Enantiopure Pdt  
 Rh<sub>2</sub>(R-PTAD)<sub>4</sub>

<Chromatogram>

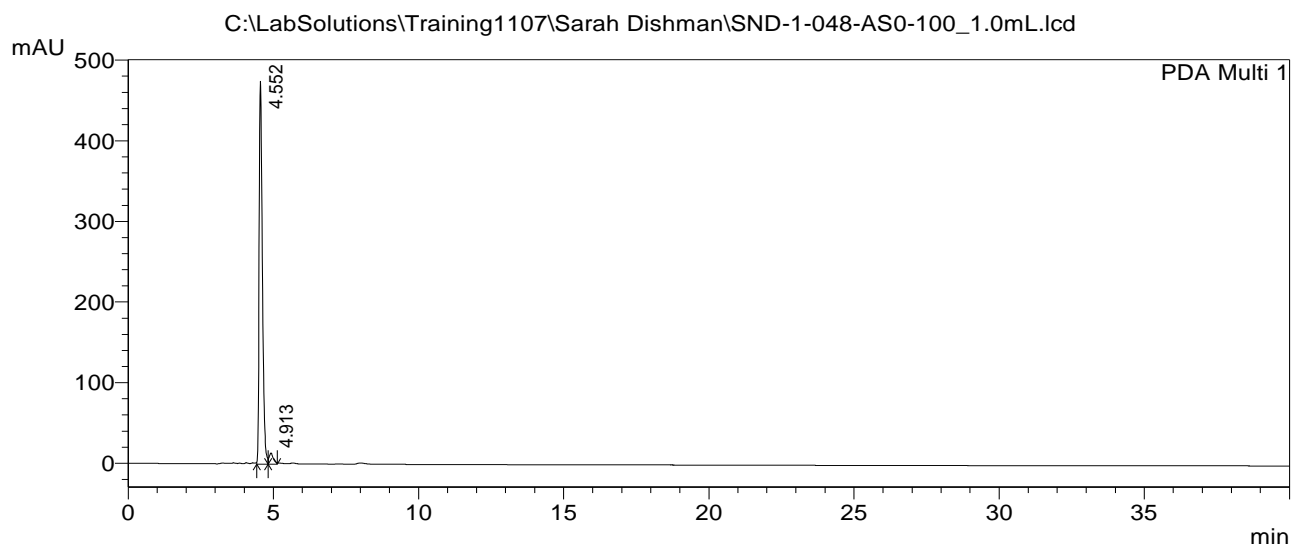

1 PDA Multi 1/235nm 4nm

< Peak Table >

PeakTable C:\LabSolutions\Training1107\Sarah Dishman\SND-1-048-AS0-100\_1.0mL.lcd

PDA Ch1 235nm 4nm

| Peak# | Ret. Time | Area    | Height | Area %  | Height % |
|-------|-----------|---------|--------|---------|----------|
| 1     | 4.552     | 3649923 | 474903 | 96.198  | 97.135   |
| 2     | 4.913     | 144239  | 14010  | 3.802   | 2.865    |
| Total |           | 3794162 | 488913 | 100.000 | 100.000  |

==== HPLC Analysis Report ====

Acquired by : Admin  
 Sample Name : 1  
 Sample ID : 1  
 Tray# : 1  
 Vial # : 86  
 Injection Volume : 2 uL  
 Data File Name : SND-1-049-AS0-100\_1.0mL.lcd  
 Method File Name : AS-0\_100\_40min.lcm  
 Batch File Name : 04-10-19\_SND-048,049.lcb  
 Report File Name : UCD Default.lcr  
 Data Acquired : 4/10/2019 9:19:38 PM  
 Data Processed : 6/6/2019 8:58:35 AM

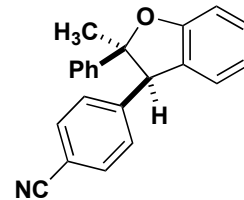

**5a**

Enantiopure SM  
 Enantiopure Pdt  
 Rh<sub>2</sub>(S-PTAD)<sub>4</sub>

<Chromatogram>

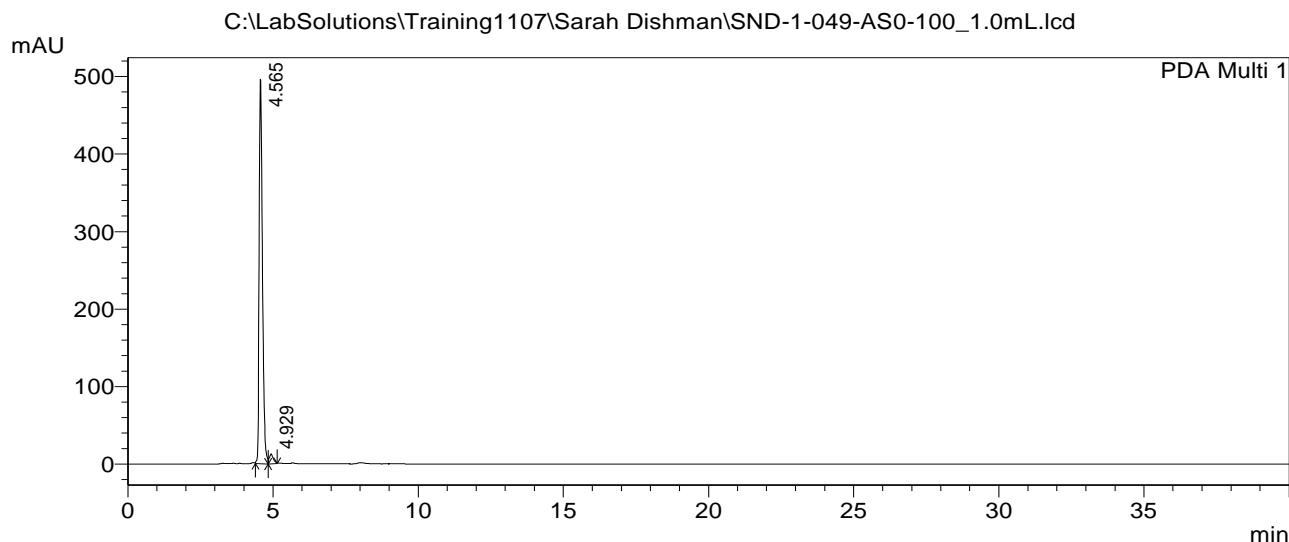

1 PDA Multi 1/235nm 4nm

< Peak Table >

PeakTable C:\LabSolutions\Training1107\Sarah Dishman\SND-1-049-AS0-100\_1.0mL.lcd

PDA Ch1 235nm 4nm

| Peak# | Ret. Time | Area    | Height | Area %  | Height % |
|-------|-----------|---------|--------|---------|----------|
| 1     | 4.565     | 3837807 | 496241 | 96.857  | 97.526   |
| 2     | 4.929     | 124551  | 12587  | 3.143   | 2.474    |
| Total |           | 3962359 | 508827 | 100.000 | 100.000  |

==== HPLC Analysis Report ====

Acquired by : Admin  
 Sample Name : 1  
 Sample ID : 1  
 Tray# : 1  
 Vial # : 72  
 Injection Volume : 2 uL  
 Data File Name : SND-1-062-AS0-100\_1.0mL.lcd  
 Method File Name : AS-0\_100\_40min.lcm  
 Batch File Name : 04-17-19\_SND-061,062.lcb  
 Report File Name : UCD Default.lcr  
 Data Acquired : 4/17/2019 9:47:00 PM  
 Data Processed : 4/18/2019 6:06:36 PM

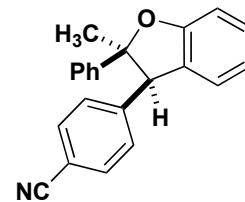

**5a**

Racemic SM  
 Racemic Pdt  
 Rh<sub>2</sub>(R-PTAD)<sub>4</sub>

<Chromatogram>

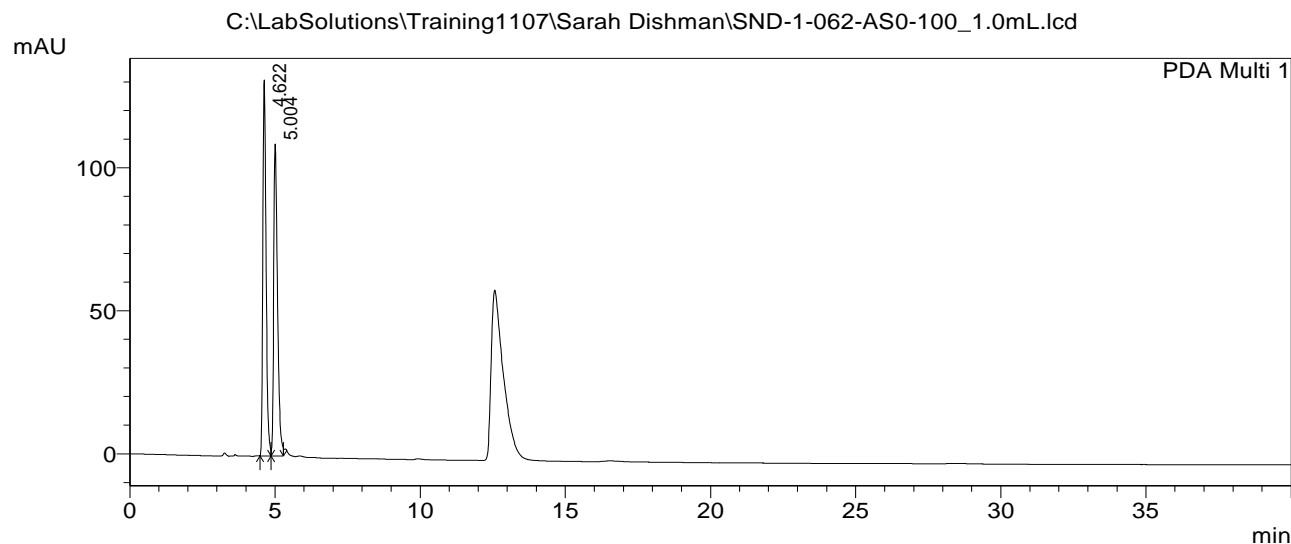

< Peak Table >

PeakTable C:\LabSolutions\Training1107\Sarah Dishman\SND-1-062-AS0-100\_1.0mL.lcd

PDA Ch1 235nm 4nm

| Peak# | Ret. Time | Area    | Height | Area %  | Height % |
|-------|-----------|---------|--------|---------|----------|
| 1     | 4.622     | 1008674 | 131489 | 50.352  | 54.654   |
| 2     | 5.004     | 994572  | 109096 | 49.648  | 45.346   |
| Total |           | 2003246 | 240585 | 100.000 | 100.000  |

### ==== HPLC Analysis Report ====

Acquired by : Admin  
 Sample Name : 1  
 Sample ID : 1  
 Tray# : 1  
 Vial # : 71  
 Injection Volume : 2 uL  
 Data File Name : SND-1-061-AS0-100\_1.0mL.lcd  
 Method File Name : AS-0\_100\_40min.lcm  
 Batch File Name : 04-17-19\_SND-061,062.lcb  
 Report File Name : UCD Default.lcr  
 Data Acquired : 4/17/2019 10:47:36 PM  
 Data Processed : 6/6/2019 10:00:13 AM

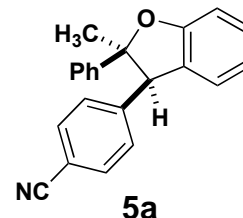

**5a**  
 Racemic SM  
 Racemic Pdt  
 Rh<sub>2</sub>(S-PTAD)<sub>4</sub>

#### <Chromatogram>

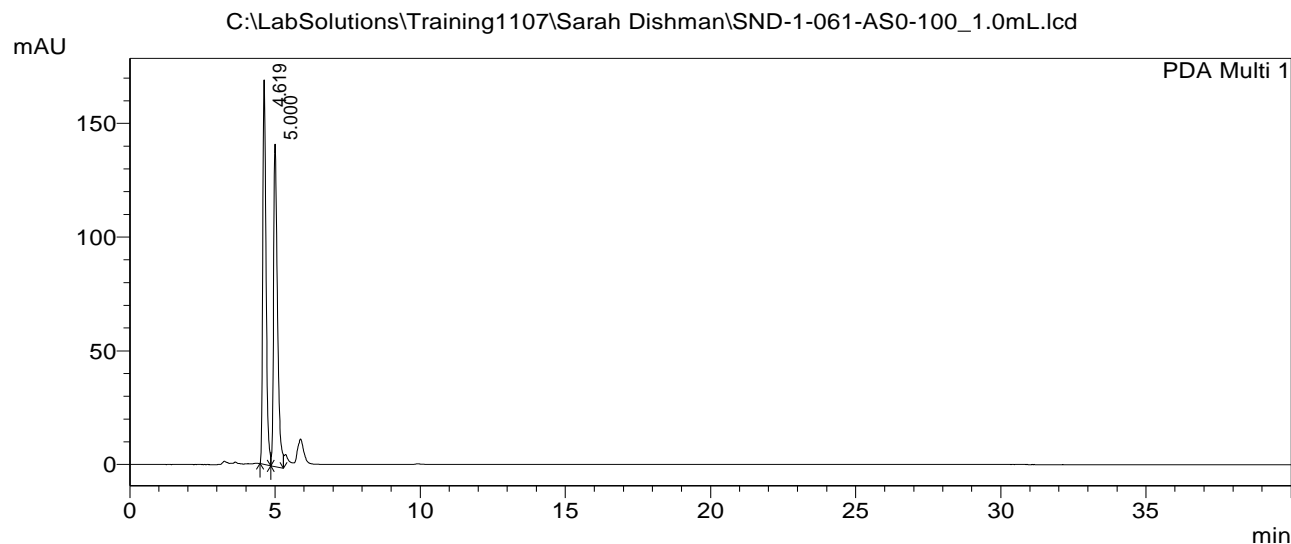

#### < Peak Table >

PeakTable C:\LabSolutions\Training1107\Sarah Dishman\SND-1-061-AS0-100\_1.0mL.lcd

PDA Ch1 235nm 4nm

| Peak# | Ret. Time | Area    | Height | Area %  | Height % |
|-------|-----------|---------|--------|---------|----------|
| 1     | 4.619     | 1312223 | 168965 | 49.798  | 54.372   |
| 2     | 5.000     | 1322894 | 141792 | 50.202  | 45.628   |
| Total |           | 2635117 | 310758 | 100.000 | 100.000  |

### ==== HPLC Analysis Report ====

C:\LabSolutions\Training1107\Sarah Dishman\SND-1-066-AS0-100\_1.0mL.lcd  
 Acquired by : Admin  
 Sample Name : 1  
 Sample ID : 1  
 Tray# : 1  
 Vial # : 38  
 Injection Volume : 2 uL  
 Data File Name : SND-1-066-AS0-100\_1.0mL.lcd  
 Method File Name : AS-0\_100\_40min.lcm  
 Batch File Name : 04-24-19\_SND-066,069.lcb  
 Report File Name : UCD Default.lcr  
 Data Acquired : 4/24/2019 9:40:06 PM  
 Data Processed : 4/24/2019 10:20:08 PM

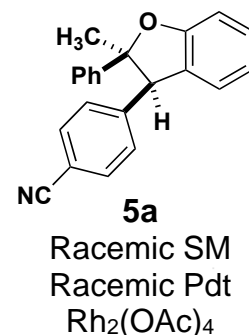

#### <Chromatogram>

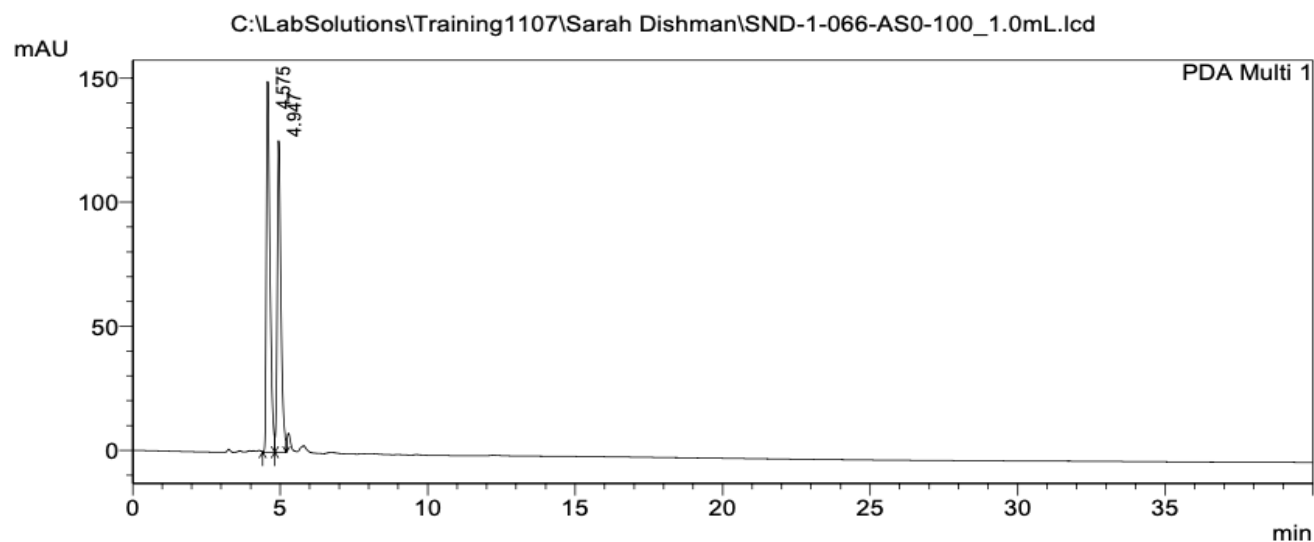

#### < Peak Table >

PeakTable C:\LabSolutions\Training1107\Sarah Dishman\SND-1-066-AS0-100\_1.0mL.lcd

PDA Ch1 235nm 4nm

| Peak# | Ret. Time | Area    | Height | Area %  | Height % |
|-------|-----------|---------|--------|---------|----------|
| 1     | 4.575     | 1253623 | 149346 | 52.781  | 54.334   |
| 2     | 4.947     | 1121527 | 125519 | 47.219  | 45.666   |
| Total |           | 2375150 | 274865 | 100.000 | 100.000  |

## ==== HPLC Analysis Report ====

C:\LabSolutions\Training1107\Sarah Dishman\SND-1-097-OD100-0\_1.0mL.lcd  
 Acquired by : Admin  
 Sample Name : 1  
 Sample ID : 1  
 Tray# : 1  
 Vial # : 37  
 Injection Volume : 2 uL  
 Data File Name : SND-1-097-OD100-0\_1.0mL.lcd  
 Method File Name : OD-100\_0\_Hexane\_IPA\_60min.lcm  
 Batch File Name : 06-03-19\_3.lcb  
 Report File Name : UCD Default.lcr  
 Data Acquired : 6/3/2019 11:50:58 PM  
 Data Processed : 6/4/2019 12:50:58 AM

**6a/b**  
 Racemic SM  
 Racemic Pdt  
 Rh<sub>2</sub>(mes)<sub>4</sub>  
**57:43 dr**  
**Racemic**

### <Chromatogram>

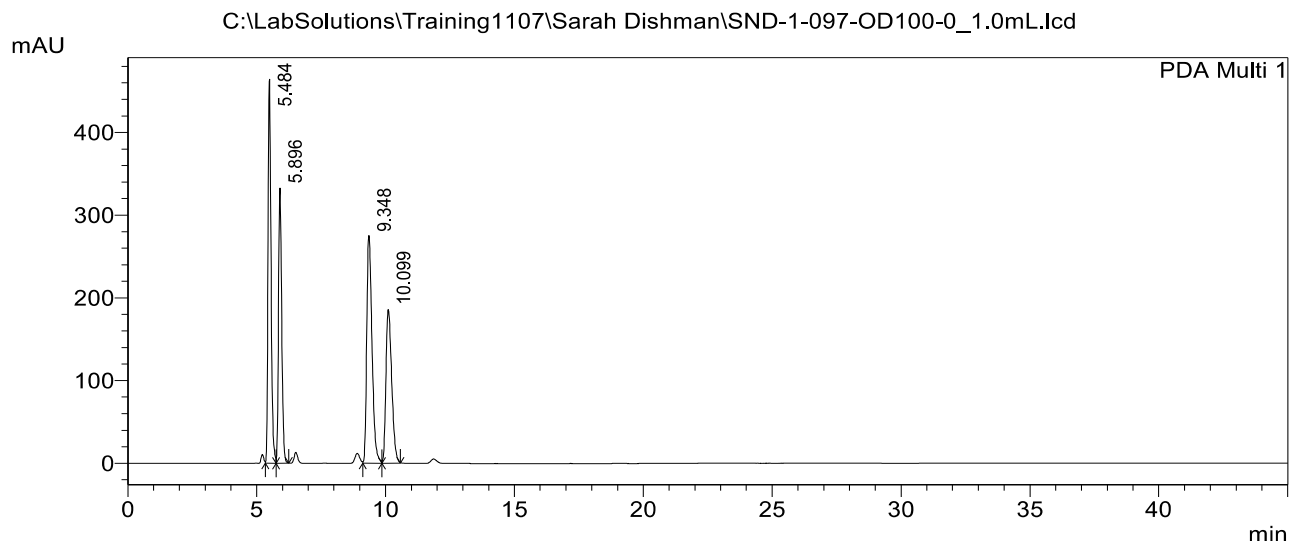

1 PDA Multi 1/283nm 4nm

### < Peak Table >

PeakTable C:\LabSolutions\Training1107\Sarah Dishman\SND-1-097-OD100-0\_1.0mL.lcd

PDA Ch1 283nm 4nm

| Peak# | Ret. Time | Area     | Height  | Area %  | Height % |
|-------|-----------|----------|---------|---------|----------|
| 1     | 5.484     | 3771977  | 464212  | 27.990  | 36.896   |
| 2     | 5.896     | 2884662  | 332550  | 21.406  | 26.431   |
| 3     | 9.348     | 3912561  | 275452  | 29.033  | 21.893   |
| 4     | 10.099    | 2906882  | 185956  | 21.571  | 14.780   |
| Total |           | 13476082 | 1258169 | 100.000 | 100.000  |

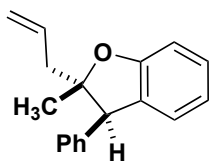

Peak 1  
Trans-(S,R)

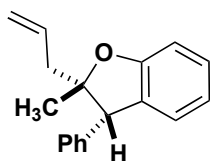

Peak 2  
Cis-(S,S)

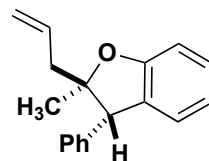

Peak 3  
Trans-(R,S)

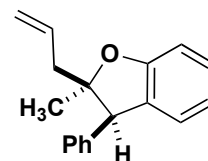

Peak 4  
Cis-(R,R)

## ==== HPLC Analysis Report ====

C:\LabSolutions\Training1107\Sarah Dishman\SND-1-090-OD100-0\_1.0mL.lcd  
 Acquired by : Admin  
 Sample Name : 1  
 Sample ID : 1  
 Tray# : 1  
 Vial # : 38  
 Injection Volume : 2 uL  
 Data File Name : SND-1-090-OD100-0\_1.0mL.lcd  
 Method File Name : OD-100\_0\_Hexane\_IPA\_60min.lcm  
 Batch File Name : 06-03-19\_3.lcb  
 Report File Name : UCD Default.lcr  
 Data Acquired : 6/4/2019 1:01:33 AM  
 Data Processed : 6/4/2019 2:01:35 AM

**47:53 6a/b**  
 Racemic SM  
 Mixed dr Pdt  
 Rh<sub>2</sub>(R-PTAD)<sub>4</sub>

### <Chromatogram>

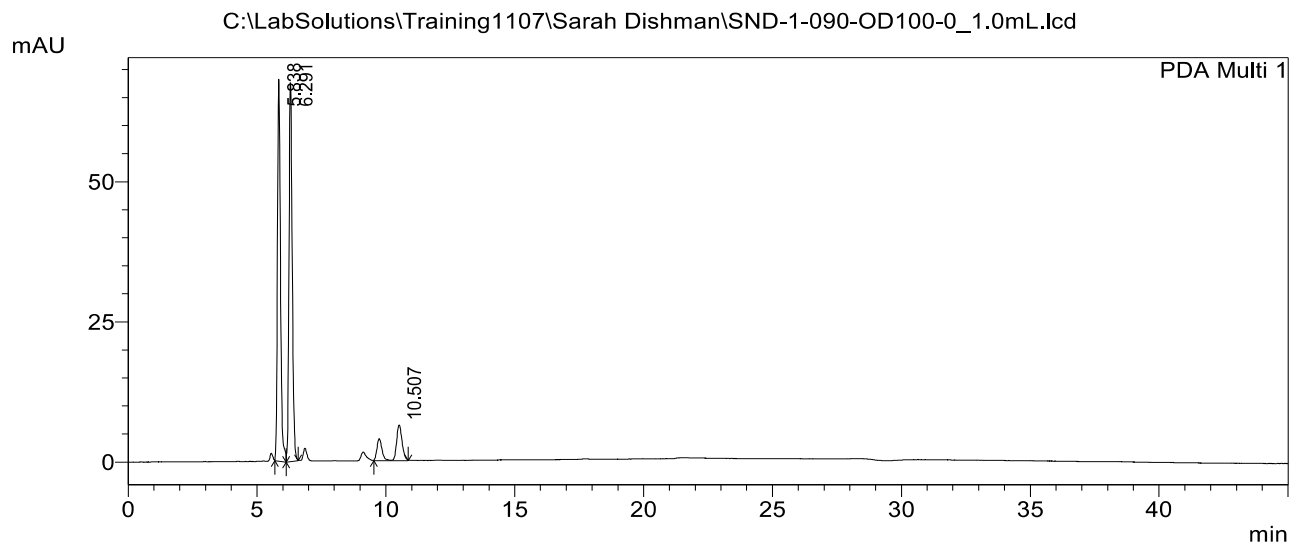

1 PDA Multi 1/283nm 4nm

### < Peak Table >

PeakTable C:\LabSolutions\Training1107\Sarah Dishman\SND-1-090-OD100-0\_1.0mL.lcd

PDA Ch1 283nm 4nm

| Peak# | Ret. Time | Area    | Height | Area %  | Height % |
|-------|-----------|---------|--------|---------|----------|
| 1     | 5.838     | 562623  | 68131  | 43.085  | 47.935   |
| 2     | 6.291     | 593778  | 67598  | 45.470  | 47.560   |
| 3     | 10.507    | 149455  | 6402   | 11.445  | 4.505    |
| Total |           | 1305857 | 142132 | 100.000 | 100.000  |

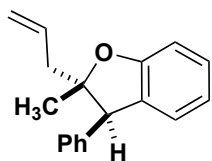

Peak 1  
Trans-(S,R)

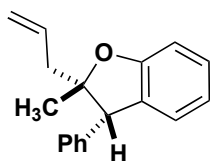

Peak 2  
Cis-(S,S)

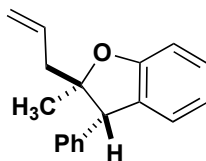

Peak 3  
Trans-(R,S)

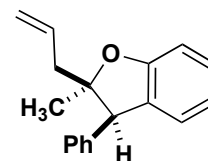

Peak 4  
Cis-(R,R)



## ==== HPLC Analysis Report ====

C:\LabSolutions\Training1107\Sarah Dishman\SND-1-091-OD100-0\_1.0mL.lcd  
 Acquired by : Admin  
 Sample Name : 1  
 Sample ID : 1  
 Tray# : 1  
 Vial # : 39  
 Injection Volume : 2 uL  
 Data File Name : SND-1-091-OD100-0\_1.0mL.lcd  
 Method File Name : OD-100\_0\_Hexane\_IPA\_60min.lcm  
 Batch File Name : 06-03-19\_3.lcb  
 Report File Name : UCD Default.lcr  
 Data Acquired : 6/4/2019 2:12:08 AM  
 Data Processed : 6/4/2019 3:12:11 AM

**6a/b**  
 Racemic SM  
 Mix dr Pdt  
 Rh<sub>2</sub>(S-PTAD)<sub>4</sub>

### <Chromatogram>

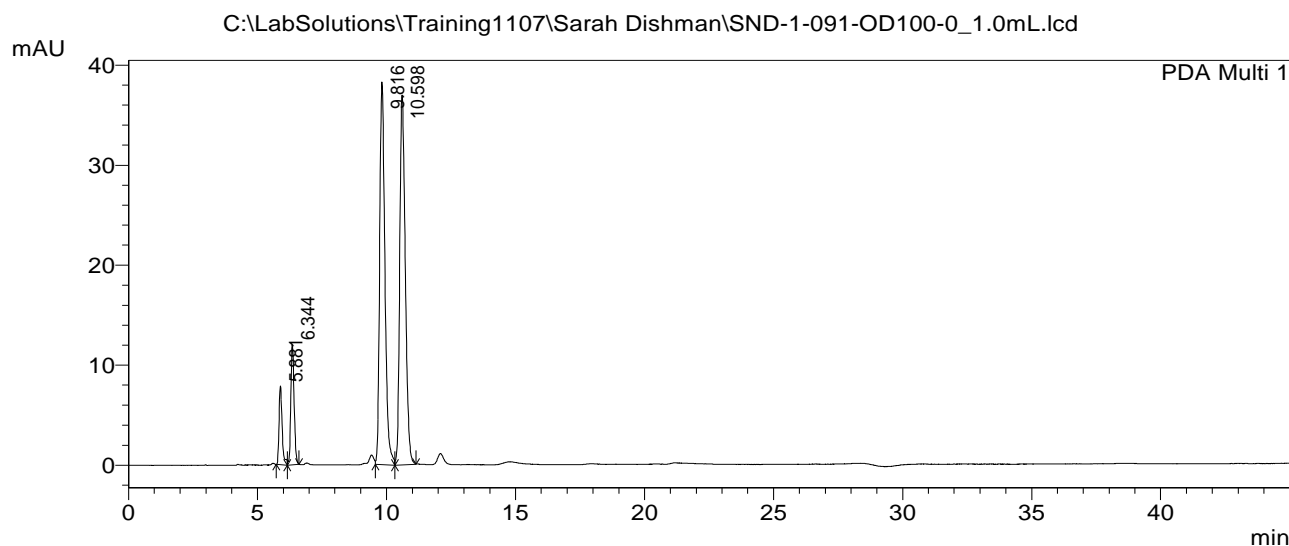

1 PDA Multi 1/283nm 4nm

### < Peak Table >

PeakTable C:\LabSolutions\Training1107\Sarah Dishman\SND-1-091-OD100-0\_1.0mL.lcd

PDA Ch1 283nm 4nm

| Peak# | Ret. Time | Area    | Height | Area %  | Height % |
|-------|-----------|---------|--------|---------|----------|
| 1     | 5.881     | 67042   | 7876   | 5.283   | 8.278    |
| 2     | 6.344     | 106549  | 11996  | 8.396   | 12.609   |
| 3     | 9.816     | 540813  | 38273  | 42.617  | 40.229   |
| 4     | 10.598    | 554589  | 36993  | 43.703  | 38.884   |
| Total |           | 1268992 | 95137  | 100.000 | 100.000  |

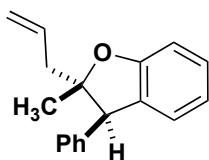

Peak 1  
Trans-(S,R)

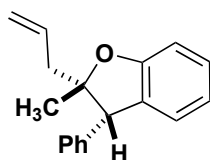

Peak 2  
Cis-(S,S)

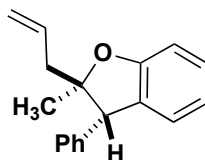

Peak 3  
Trans-(R,S)

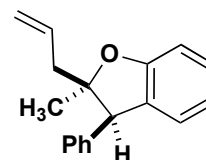

Peak 4  
Cis-(R,R)

## ==== HPLC Analysis Report ====

C:\LabSolutions\Training1107\Sarah Dishman\SND-1-131-OD100-0\_1.0mL.lcd  
 Acquired by : Admin  
 Sample Name : 1  
 Sample ID : 1  
 Tray# : 1  
 Vial # : 39  
 Injection Volume : 5  $\mu$ L  
 Data File Name : SND-1-131-OD100-0\_1.0mL.lcd  
 Method File Name : OD-100\_0\_Hexane\_IPA\_20min.lcm  
 Batch File Name : 06-19-19\_SND-129-131.lcb  
 Report File Name : UCD Default.lcr  
 Data Acquired : 6/19/2019 9:21:29 PM  
 Data Processed : 6/19/2019 9:41:31 PM

**6a/b**  
 Enantiopure SM  
 Enantiopure, mixed dr Pdt  
 Rh<sub>2</sub>(mes)<sub>4</sub>

### <Chromatogram>

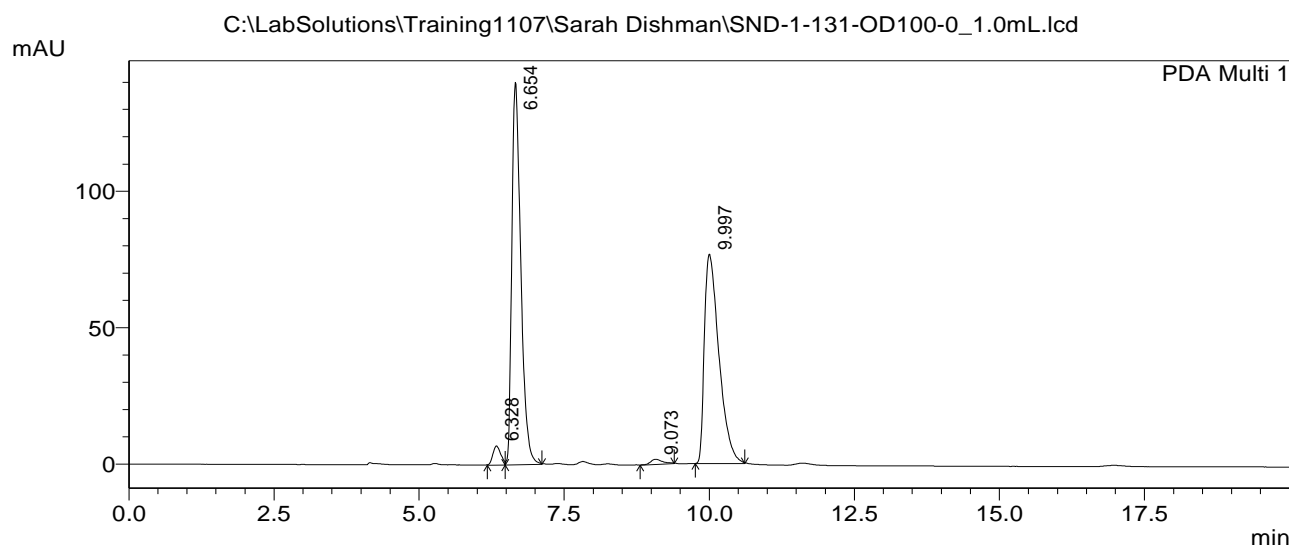

### < Peak Table >

PeakTable C:\LabSolutions\Training1107\Sarah Dishman\SND-1-131-OD100-0\_1.0mL.lcd  
 PDA Ch1 283nm 4nm

| Peak# | Ret. Time | Area    | Height | Area %  | Height % |
|-------|-----------|---------|--------|---------|----------|
| 1     | 6.328     | 67653   | 7083   | 2.297   | 3.135    |
| 2     | 6.654     | 1509797 | 140236 | 51.270  | 62.067   |
| 3     | 9.073     | 28302   | 1915   | 0.961   | 0.847    |
| 4     | 9.997     | 1339047 | 76711  | 45.472  | 33.951   |
| Total |           | 2944798 | 225945 | 100.000 | 100.000  |

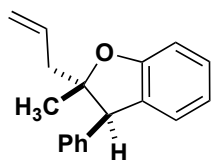

Peak 2  
Trans-(S,R)

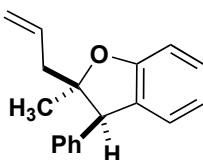

Peak 4  
Cis-(R,R)

### ==== HPLC Analysis Report ====

C:\LabSolutions\Training1107\Sarah Dishman\SND-1-129-OD100\_0\_1.0mL.lcd  
 Acquired by : Admin  
 Sample Name : 1  
 Sample ID : 1  
 Tray# : 1  
 Vial # : 37  
 Injection Volume : 5 uL  
 Data File Name : SND-1-129-OD100\_0\_1.0mL.lcd  
 Method File Name : OD-100\_0\_Hexane\_IPA\_20min.lcm  
 Batch File Name : 06-19-19\_SND-129-131.lcb  
 Report File Name : UCD Default.lcr  
 Data Acquired : 6/19/2019 8:30:18 PM  
 Data Processed : 6/19/2019 8:50:19 PM

**6a/b**  
 Enantiopure SM  
 Enantiopure Pdt  
 Rh<sub>2</sub>(R-PTAD)<sub>4</sub>

#### <Chromatogram>

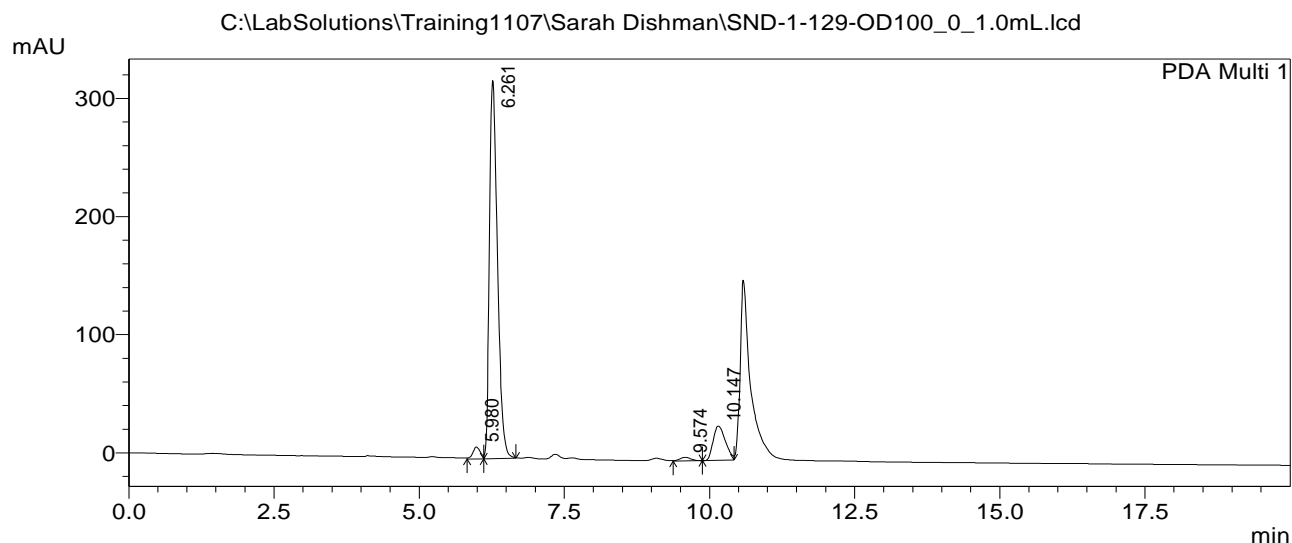

#### < Peak Table >

PeakTable C:\LabSolutions\Training1107\Sarah Dishman\SND-1-129-OD100\_0\_1.0mL.lcd  
 PDA Ch1 283nm 4nm

| Peak# | Ret. Time | Area    | Height | Area %  | Height % |
|-------|-----------|---------|--------|---------|----------|
| 1     | 5.980     | 91770   | 10083  | 2.511   | 2.784    |
| 2     | 6.261     | 3097857 | 319888 | 84.757  | 88.321   |
| 3     | 9.574     | 39610   | 3106   | 1.084   | 0.858    |
| 4     | 10.147    | 425745  | 29109  | 11.648  | 8.037    |
| Total |           | 3654981 | 362186 | 100.000 | 100.000  |

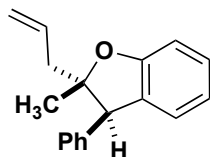

Peak 2  
Trans-(S,R)

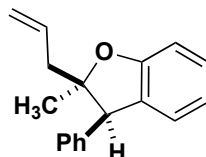

Peak 4  
Cis-(R,R)

### ==== HPLC Analysis Report ====

Acquired by : Admin  
 Sample Name : 1  
 Sample ID : 1  
 Tray# : 1  
 Vial # : 38  
 Injection Volume : 5 uL  
 Data File Name : SND-1-130-100-0\_1.0mL.lcd  
 Method File Name : OD-100\_0\_Hexane\_IPA\_20min.lcm  
 Batch File Name : 06-19-19\_SND-129-131.lcb  
 Report File Name : UCD Default.lcr  
 Data Acquired : 6/19/2019 8:55:54 PM  
 Data Processed : 6/19/2019 9:15:56 PM

**6/b**  
 Enantiopure SM  
 Enantiopure Pdt  
 Rh<sub>2</sub>(S-PTAD)<sub>4</sub>

#### <Chromatogram>

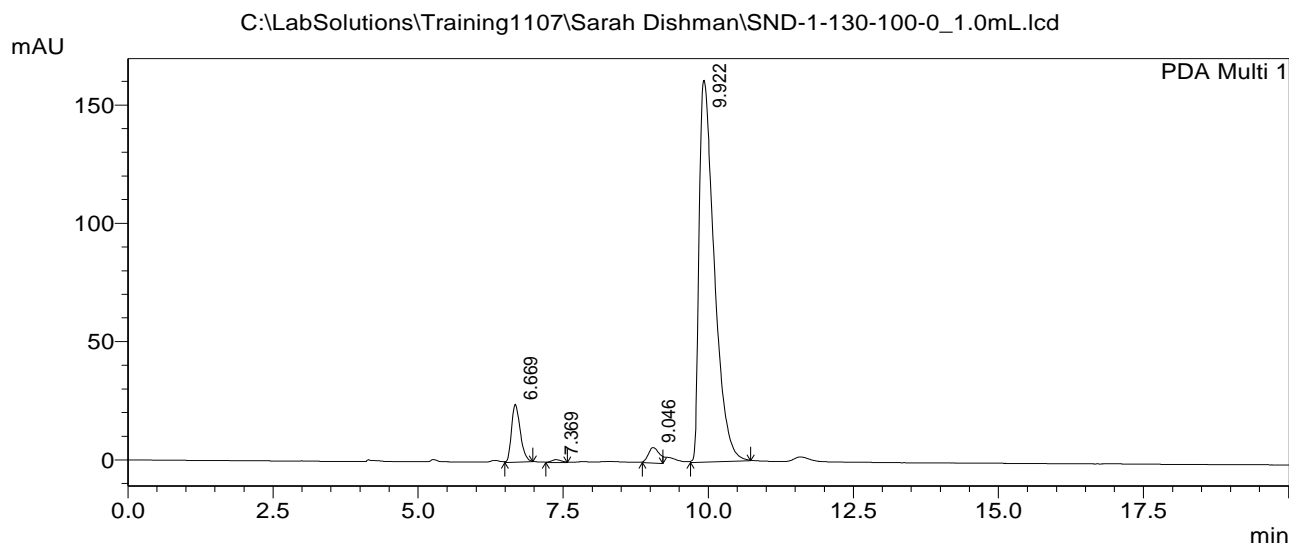

#### < Peak Table >

PeakTable C:\LabSolutions\Training1107\Sarah Dishman\SND-1-130-100-0\_1.0mL.lcd

PDA Ch1 283nm 4nm

| Peak# | Ret. Time | Area    | Height | Area %  | Height % |
|-------|-----------|---------|--------|---------|----------|
| 1     | 6.669     | 258443  | 24561  | 7.824   | 12.672   |
| 2     | 7.369     | 15528   | 1247   | 0.470   | 0.644    |
| 3     | 9.046     | 86561   | 6559   | 2.621   | 3.384    |
| 4     | 9.922     | 2942497 | 161461 | 89.085  | 83.301   |
| Total |           | 3303029 | 193829 | 100.000 | 100.000  |

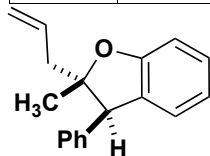

Peak 1  
Trans-(S,R)

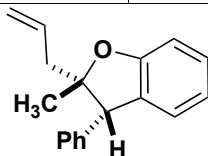

Peak 2  
Cis-(S,S)

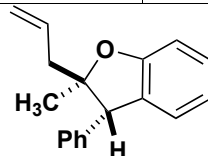

Peak 3  
Trans-(R,S)

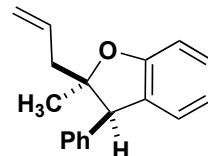

Peak 4  
Cis-(R,R)

## X-Ray Crystallography Data

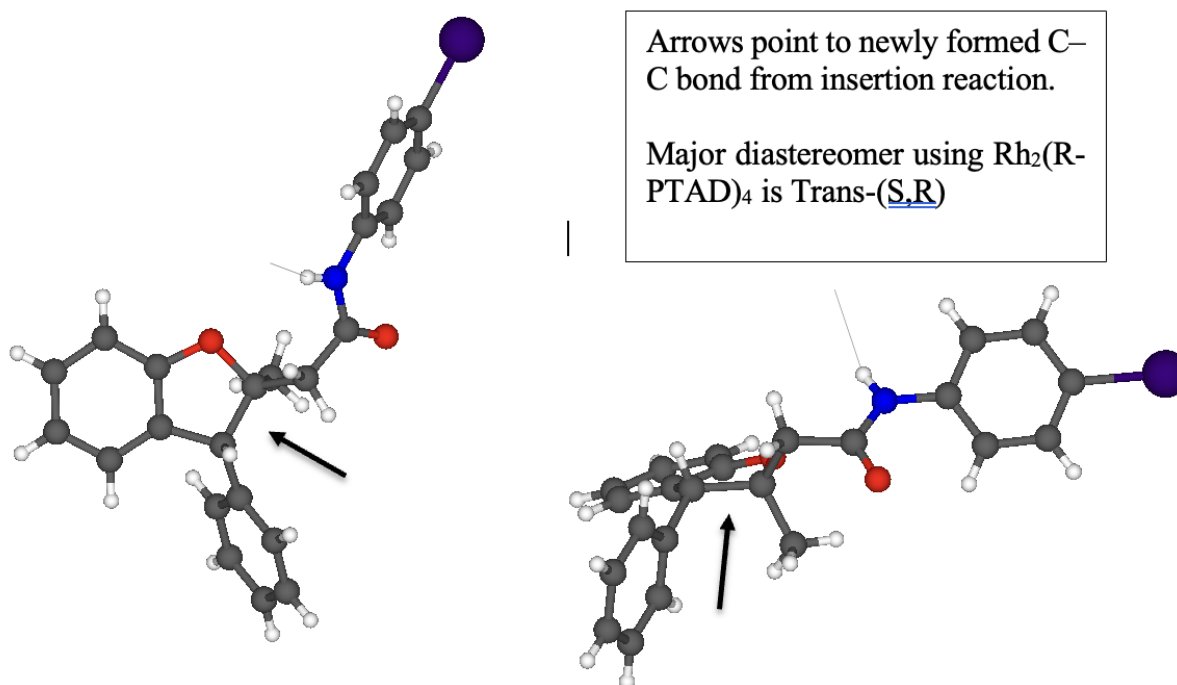

**Table 1. Crystal data and structure refinement for  $[\text{C}_{23}\text{H}_{20}\text{NO}_2]$ .**

|                        |                                          |                                |
|------------------------|------------------------------------------|--------------------------------|
| Identification code    | JF2873FF (SND-02-11)                     |                                |
| Empirical formula      | $\text{C}_{23}\text{H}_{20}\text{N O}_2$ |                                |
| Formula weight         | 469.30                                   |                                |
| Temperature            | 100(2) K                                 |                                |
| Wavelength             | 0.71073 Å                                |                                |
| Crystal system         | Triclinic                                |                                |
| Space group            | P1                                       |                                |
| Unit cell dimensions   | $a = 8.7754(5)$ Å                        | $\alpha = 99.2233(18)^\circ$ . |
|                        | $b = 8.8984(6)$ Å                        | $\beta = 96.0361(18)^\circ$ .  |
|                        | $c = 12.8772(8)$ Å                       | $\gamma = 91.1970(17)^\circ$ . |
| Volume                 | $986.31(11)$ Å <sup>3</sup>              |                                |
| Z, Z'                  | 2, 2                                     |                                |
| Density (calculated)   | $1.580$ Mg/m <sup>3</sup>                |                                |
| Absorption coefficient | $1.641$ mm <sup>-1</sup>                 |                                |
| F(000)                 | 468                                      |                                |
| Crystal size           | 0.308 x 0.096 x 0.038 mm <sup>3</sup>    |                                |

|                                      |                                                                             |
|--------------------------------------|-----------------------------------------------------------------------------|
| Crystal color and habit              | Colorless Plate                                                             |
| Diffractionmeter                     | Bruker Photon100 CMOS                                                       |
| Theta range for data collection      | 2.336 to 29.998°.                                                           |
| Index ranges                         | -12<=h<=12, -12<=k<=12, -18<=l<=18                                          |
| Reflections collected                | 49290                                                                       |
| Independent reflections              | 11503 [R(int) = 0.0213]                                                     |
| Observed reflections (I > 2sigma(I)) | 10996                                                                       |
| Completeness to theta = 25.242°      | 99.9 %                                                                      |
| Absorption correction                | Semi-empirical from equivalents                                             |
| Max. and min. transmission           | 0.8365 and 0.7842                                                           |
| Solution method                      | SHELXT (Sheldrick, 2014)                                                    |
| Refinement method                    | SHELXL-2018/3 (Sheldrick, 2018) Full-matrix least-squares on F <sup>2</sup> |
| Data / restraints / parameters       | 11503 / 9 / 530                                                             |
| Goodness-of-fit on F <sup>2</sup>    | 1.059                                                                       |
| Final R indices [I>2sigma(I)]        | R1 = 0.0194, wR2 = 0.0399                                                   |
| R indices (all data)                 | R1 = 0.0217, wR2 = 0.0408                                                   |
| Absolute structure parameter         | -0.034(4)                                                                   |
| Extinction coefficient               | 0.0076(4)                                                                   |
| Largest diff. peak and hole          | 0.522 and -0.523 e.Å <sup>-3</sup>                                          |

**Table 2. Atomic coordinates ( x 10<sup>4</sup>) and equivalent isotropic displacement parameters (Å<sup>2</sup>x 10<sup>3</sup>) for JF2873FF. U(eq) is defined as one third of the trace of the orthogonalized U<sup>ij</sup> tensor.**

|      | x       | y       | z       | U(eq) |
|------|---------|---------|---------|-------|
| C(1) | 1510(3) | 5924(3) | 2669(2) | 14(1) |
| O(1) | 2967(2) | 5114(2) | 2707(2) | 18(1) |
| C(2) | 1912(3) | 7429(3) | 2248(2) | 16(1) |
| C(3) | 3287(3) | 6975(3) | 1687(2) | 16(1) |
| C(4) | 4065(4) | 7686(5) | 1004(3) | 20(1) |

|       |          |          |         |       |
|-------|----------|----------|---------|-------|
| C(5)  | 5394(3)  | 7075(3)  | 659(2)  | 23(1) |
| C(6)  | 5954(3)  | 5784(3)  | 1014(2) | 23(1) |
| C(7)  | 5186(3)  | 5040(3)  | 1697(2) | 22(1) |
| C(8)  | 3848(3)  | 5662(3)  | 2018(2) | 17(1) |
| C(9)  | 340(3)   | 4871(3)  | 1932(2) | 21(1) |
| C(10) | 1088(3)  | 6307(3)  | 3807(2) | 16(1) |
| C(11) | 387(3)   | 4978(3)  | 4212(2) | 14(1) |
| N(11) | 1384(2)  | 4185(2)  | 4770(2) | 16(1) |
| O(11) | -992(3)  | 4649(3)  | 4024(2) | 18(1) |
| C(12) | 1023(3)  | 2845(3)  | 5172(2) | 15(1) |
| C(13) | 1935(3)  | 2525(3)  | 6055(2) | 16(1) |
| C(14) | 1649(3)  | 1218(3)  | 6475(2) | 18(1) |
| C(15) | 453(3)   | 213(3)   | 5992(2) | 17(1) |
| I(15) | -49(1)   | -1778(1) | 6592(1) | 23(1) |
| C(16) | -441(4)  | 507(4)   | 5105(3) | 20(1) |
| C(17) | -166(4)  | 1835(4)  | 4690(3) | 19(1) |
| C(18) | 660(3)   | 8126(3)  | 1606(2) | 19(1) |
| C(19) | -53(4)   | 9413(3)  | 2065(3) | 28(1) |
| C(20) | -1126(4) | 10135(4) | 1462(4) | 41(1) |
| C(21) | -1497(4) | 9578(5)  | 395(4)  | 43(1) |
| C(22) | -801(4)  | 8289(5)  | -74(4)  | 34(1) |
| C(23) | 276(3)   | 7579(4)  | 532(2)  | 26(1) |
| C(31) | 7309(3)  | 4118(3)  | 7091(2) | 16(1) |
| O(31) | 8795(2)  | 4918(2)  | 7064(2) | 19(1) |
| C(32) | 7792(3)  | 2611(3)  | 7501(2) | 15(1) |
| C(33) | 9282(3)  | 3137(3)  | 8163(2) | 18(1) |
| C(34) | 10184(5) | 2498(5)  | 8914(3) | 24(1) |
| C(35) | 11603(3) | 3166(4)  | 9310(2) | 26(1) |
| C(36) | 12141(3) | 4441(4)  | 8938(2) | 26(1) |
| C(37) | 11252(3) | 5101(3)  | 8180(2) | 24(1) |
| C(38) | 9816(4)  | 4431(4)  | 7818(2) | 18(1) |
| C(39) | 6427(3)  | 5170(3)  | 7845(2) | 20(1) |
| C(40) | 6509(3)  | 3755(3)  | 5956(2) | 16(1) |
| C(41) | 5653(4)  | 5058(3)  | 5579(2) | 15(1) |
| N(41) | 6416(2)  | 5887(2)  | 4987(2) | 16(1) |
| O(41) | 4355(3)  | 5332(3)  | 5811(2) | 19(1) |

|       |         |          |         |       |
|-------|---------|----------|---------|-------|
| C(42) | 5906(3) | 7208(3)  | 4599(2) | 15(1) |
| C(43) | 4791(4) | 8123(4)  | 5039(3) | 18(1) |
| C(44) | 4372(4) | 9424(4)  | 4638(3) | 21(1) |
| C(45) | 5056(3) | 9829(3)  | 3793(2) | 18(1) |
| I(45) | 4324(1) | 11779(1) | 3189(1) | 25(1) |
| C(46) | 6176(3) | 8933(3)  | 3349(2) | 18(1) |
| C(47) | 6603(3) | 7628(3)  | 3758(2) | 16(1) |
| C(48) | 6630(3) | 1788(3)  | 8012(2) | 18(1) |
| C(49) | 6242(3) | 2304(3)  | 9028(2) | 23(1) |
| C(50) | 5172(4) | 1499(5)  | 9467(3) | 28(1) |
| C(51) | 4475(3) | 166(4)   | 8906(3) | 29(1) |
| C(52) | 4880(4) | -386(4)  | 7913(3) | 28(1) |
| C(53) | 5946(3) | 420(3)   | 7467(2) | 22(1) |

---

**Table 3. Bond lengths [Å] and angles [°] for JF2873FF.**

|            |          |
|------------|----------|
| C(1)-O(1)  | 1.481(3) |
| C(1)-C(9)  | 1.517(4) |
| C(1)-C(10) | 1.536(3) |
| C(1)-C(2)  | 1.570(3) |
| O(1)-C(8)  | 1.375(3) |
| C(2)-C(3)  | 1.500(4) |
| C(2)-C(18) | 1.509(4) |
| C(2)-H(2)  | 1.0000   |
| C(3)-C(8)  | 1.389(4) |
| C(3)-C(4)  | 1.389(5) |
| C(4)-C(5)  | 1.382(5) |
| C(4)-H(4)  | 0.9500   |
| C(5)-C(6)  | 1.384(4) |
| C(5)-H(5)  | 0.9500   |
| C(6)-C(7)  | 1.400(4) |
| C(6)-H(6)  | 0.9500   |
| C(7)-C(8)  | 1.383(4) |



|              |          |
|--------------|----------|
| C(7)-H(7)    | 0.9500   |
| C(9)-H(9A)   | 0.9800   |
| C(9)-H(9B)   | 0.9800   |
| C(9)-H(9C)   | 0.9800   |
| C(10)-C(11)  | 1.511(4) |
| C(10)-H(10A) | 0.9900   |
| C(10)-H(10B) | 0.9900   |
| C(11)-O(11)  | 1.229(4) |
| C(11)-N(11)  | 1.355(4) |
| N(11)-C(12)  | 1.416(3) |
| N(11)-H(11)  | 0.8800   |
| C(12)-C(17)  | 1.389(4) |
| C(12)-C(13)  | 1.392(3) |
| C(13)-C(14)  | 1.388(4) |
| C(13)-H(13)  | 0.9500   |
| C(14)-C(15)  | 1.390(4) |
| C(14)-H(14)  | 0.9500   |
| C(15)-C(16)  | 1.379(5) |
| C(15)-I(15)  | 2.100(2) |
| C(16)-C(17)  | 1.399(5) |
| C(16)-H(16)  | 0.9500   |
| C(17)-H(17)  | 0.9500   |
| C(18)-C(23)  | 1.393(4) |
| C(18)-C(19)  | 1.395(4) |
| C(19)-C(20)  | 1.391(5) |
| C(19)-H(19)  | 0.9500   |
| C(20)-C(21)  | 1.386(7) |
| C(20)-H(20)  | 0.9500   |
| C(21)-C(22)  | 1.391(7) |
| C(21)-H(21)  | 0.9500   |
| C(22)-C(23)  | 1.389(5) |
| C(22)-H(22)  | 0.9500   |
| C(23)-H(23)  | 0.9500   |
| C(31)-O(31)  | 1.479(3) |
| C(31)-C(39)  | 1.522(4) |
| C(31)-C(40)  | 1.535(3) |

|              |          |
|--------------|----------|
| C(31)-C(32)  | 1.568(3) |
| O(31)-C(38)  | 1.378(4) |
| C(32)-C(33)  | 1.506(4) |
| C(32)-C(48)  | 1.508(4) |
| C(32)-H(32)  | 1.0000   |
| C(33)-C(34)  | 1.386(5) |
| C(33)-C(38)  | 1.388(4) |
| C(34)-C(35)  | 1.380(5) |
| C(34)-H(34)  | 0.9500   |
| C(35)-C(36)  | 1.392(5) |
| C(35)-H(35)  | 0.9500   |
| C(36)-C(37)  | 1.396(4) |
| C(36)-H(36)  | 0.9500   |
| C(37)-C(38)  | 1.384(4) |
| C(37)-H(37)  | 0.9500   |
| C(39)-H(39A) | 0.9800   |
| C(39)-H(39B) | 0.9800   |
| C(39)-H(39C) | 0.9800   |
| C(40)-C(41)  | 1.511(4) |
| C(40)-H(40A) | 0.9900   |
| C(40)-H(40B) | 0.9900   |
| C(41)-O(41)  | 1.227(4) |
| C(41)-N(41)  | 1.357(4) |
| N(41)-C(42)  | 1.412(3) |
| N(41)-H(41)  | 0.8800   |
| C(42)-C(43)  | 1.393(4) |
| C(42)-C(47)  | 1.396(3) |
| C(43)-C(44)  | 1.383(5) |
| C(43)-H(43)  | 0.9500   |
| C(44)-C(45)  | 1.389(5) |
| C(44)-H(44)  | 0.9500   |
| C(45)-C(46)  | 1.390(4) |
| C(45)-I(45)  | 2.098(3) |
| C(46)-C(47)  | 1.392(4) |
| C(46)-H(46)  | 0.9500   |
| C(47)-H(47)  | 0.9500   |

|             |          |
|-------------|----------|
| C(48)-C(53) | 1.393(4) |
| C(48)-C(49) | 1.396(4) |
| C(49)-C(50) | 1.388(5) |
| C(49)-H(49) | 0.9500   |
| C(50)-C(51) | 1.380(5) |
| C(50)-H(50) | 0.9500   |
| C(51)-C(52) | 1.380(5) |
| C(51)-H(51) | 0.9500   |
| C(52)-C(53) | 1.391(4) |
| C(52)-H(52) | 0.9500   |
| C(53)-H(53) | 0.9500   |

|                 |            |
|-----------------|------------|
| O(1)-C(1)-C(9)  | 106.7(2)   |
| O(1)-C(1)-C(10) | 107.63(19) |
| C(9)-C(1)-C(10) | 113.7(2)   |
| O(1)-C(1)-C(2)  | 104.29(19) |
| C(9)-C(1)-C(2)  | 114.0(2)   |
| C(10)-C(1)-C(2) | 109.9(2)   |
| C(8)-O(1)-C(1)  | 107.1(2)   |
| C(3)-C(2)-C(18) | 115.2(2)   |
| C(3)-C(2)-C(1)  | 101.29(19) |
| C(18)-C(2)-C(1) | 118.1(2)   |
| C(3)-C(2)-H(2)  | 107.2      |
| C(18)-C(2)-H(2) | 107.2      |
| C(1)-C(2)-H(2)  | 107.2      |
| C(8)-C(3)-C(4)  | 119.9(3)   |
| C(8)-C(3)-C(2)  | 108.7(2)   |
| C(4)-C(3)-C(2)  | 131.3(3)   |
| C(5)-C(4)-C(3)  | 119.4(3)   |
| C(5)-C(4)-H(4)  | 120.3      |
| C(3)-C(4)-H(4)  | 120.3      |
| C(4)-C(5)-C(6)  | 119.9(3)   |
| C(4)-C(5)-H(5)  | 120.1      |
| C(6)-C(5)-H(5)  | 120.1      |
| C(5)-C(6)-C(7)  | 121.8(3)   |
| C(5)-C(6)-H(6)  | 119.1      |

|                     |          |
|---------------------|----------|
| C(7)-C(6)-H(6)      | 119.1    |
| C(8)-C(7)-C(6)      | 117.1(3) |
| C(8)-C(7)-H(7)      | 121.4    |
| C(6)-C(7)-H(7)      | 121.4    |
| O(1)-C(8)-C(7)      | 125.3(3) |
| O(1)-C(8)-C(3)      | 112.8(2) |
| C(7)-C(8)-C(3)      | 121.9(3) |
| C(1)-C(9)-H(9A)     | 109.5    |
| C(1)-C(9)-H(9B)     | 109.5    |
| H(9A)-C(9)-H(9B)    | 109.5    |
| C(1)-C(9)-H(9C)     | 109.5    |
| H(9A)-C(9)-H(9C)    | 109.5    |
| H(9B)-C(9)-H(9C)    | 109.5    |
| C(11)-C(10)-C(1)    | 114.1(2) |
| C(11)-C(10)-H(10A)  | 108.7    |
| C(1)-C(10)-H(10A)   | 108.7    |
| C(11)-C(10)-H(10B)  | 108.7    |
| C(1)-C(10)-H(10B)   | 108.7    |
| H(10A)-C(10)-H(10B) | 107.6    |
| O(11)-C(11)-N(11)   | 123.5(3) |
| O(11)-C(11)-C(10)   | 121.1(3) |
| N(11)-C(11)-C(10)   | 115.4(2) |
| C(11)-N(11)-C(12)   | 125.9(2) |
| C(11)-N(11)-H(11)   | 117.0    |
| C(12)-N(11)-H(11)   | 117.0    |
| C(17)-C(12)-C(13)   | 119.9(3) |
| C(17)-C(12)-N(11)   | 122.0(3) |
| C(13)-C(12)-N(11)   | 118.1(2) |
| C(14)-C(13)-C(12)   | 120.6(2) |
| C(14)-C(13)-H(13)   | 119.7    |
| C(12)-C(13)-H(13)   | 119.7    |
| C(13)-C(14)-C(15)   | 119.2(2) |
| C(13)-C(14)-H(14)   | 120.4    |
| C(15)-C(14)-H(14)   | 120.4    |
| C(16)-C(15)-C(14)   | 120.6(3) |
| C(16)-C(15)-I(15)   | 118.3(2) |

|                   |            |
|-------------------|------------|
| C(14)-C(15)-I(15) | 121.12(19) |
| C(15)-C(16)-C(17) | 120.2(3)   |
| C(15)-C(16)-H(16) | 119.9      |
| C(17)-C(16)-H(16) | 119.9      |
| C(12)-C(17)-C(16) | 119.4(3)   |
| C(12)-C(17)-H(17) | 120.3      |
| C(16)-C(17)-H(17) | 120.3      |
| C(23)-C(18)-C(19) | 118.7(3)   |
| C(23)-C(18)-C(2)  | 121.2(2)   |
| C(19)-C(18)-C(2)  | 119.9(3)   |
| C(20)-C(19)-C(18) | 120.5(3)   |
| C(20)-C(19)-H(19) | 119.7      |
| C(18)-C(19)-H(19) | 119.7      |
| C(21)-C(20)-C(19) | 120.2(4)   |
| C(21)-C(20)-H(20) | 119.9      |
| C(19)-C(20)-H(20) | 119.9      |
| C(20)-C(21)-C(22) | 120.0(3)   |
| C(20)-C(21)-H(21) | 120.0      |
| C(22)-C(21)-H(21) | 120.0      |
| C(23)-C(22)-C(21) | 119.6(4)   |
| C(23)-C(22)-H(22) | 120.2      |
| C(21)-C(22)-H(22) | 120.2      |
| C(22)-C(23)-C(18) | 121.1(3)   |
| C(22)-C(23)-H(23) | 119.5      |
| C(18)-C(23)-H(23) | 119.5      |
| O(31)-C(31)-C(39) | 106.3(2)   |
| O(31)-C(31)-C(40) | 108.4(2)   |
| C(39)-C(31)-C(40) | 114.0(2)   |
| O(31)-C(31)-C(32) | 103.13(19) |
| C(39)-C(31)-C(32) | 114.0(2)   |
| C(40)-C(31)-C(32) | 110.3(2)   |
| C(38)-O(31)-C(31) | 106.6(2)   |
| C(33)-C(32)-C(48) | 117.1(2)   |
| C(33)-C(32)-C(31) | 100.8(2)   |
| C(48)-C(32)-C(31) | 117.9(2)   |
| C(33)-C(32)-H(32) | 106.7      |

|                     |          |
|---------------------|----------|
| C(48)-C(32)-H(32)   | 106.7    |
| C(31)-C(32)-H(32)   | 106.7    |
| C(34)-C(33)-C(38)   | 119.9(3) |
| C(34)-C(33)-C(32)   | 132.2(3) |
| C(38)-C(33)-C(32)   | 107.6(2) |
| C(35)-C(34)-C(33)   | 119.1(4) |
| C(35)-C(34)-H(34)   | 120.4    |
| C(33)-C(34)-H(34)   | 120.4    |
| C(34)-C(35)-C(36)   | 120.4(3) |
| C(34)-C(35)-H(35)   | 119.8    |
| C(36)-C(35)-H(35)   | 119.8    |
| C(35)-C(36)-C(37)   | 121.3(3) |
| C(35)-C(36)-H(36)   | 119.3    |
| C(37)-C(36)-H(36)   | 119.3    |
| C(38)-C(37)-C(36)   | 117.0(3) |
| C(38)-C(37)-H(37)   | 121.5    |
| C(36)-C(37)-H(37)   | 121.5    |
| O(31)-C(38)-C(37)   | 124.8(3) |
| O(31)-C(38)-C(33)   | 112.9(3) |
| C(37)-C(38)-C(33)   | 122.2(3) |
| C(31)-C(39)-H(39A)  | 109.5    |
| C(31)-C(39)-H(39B)  | 109.5    |
| H(39A)-C(39)-H(39B) | 109.5    |
| C(31)-C(39)-H(39C)  | 109.5    |
| H(39A)-C(39)-H(39C) | 109.5    |
| H(39B)-C(39)-H(39C) | 109.5    |
| C(41)-C(40)-C(31)   | 114.7(2) |
| C(41)-C(40)-H(40A)  | 108.6    |
| C(31)-C(40)-H(40A)  | 108.6    |
| C(41)-C(40)-H(40B)  | 108.6    |
| C(31)-C(40)-H(40B)  | 108.6    |
| H(40A)-C(40)-H(40B) | 107.6    |
| O(41)-C(41)-N(41)   | 123.3(3) |
| O(41)-C(41)-C(40)   | 120.9(3) |
| N(41)-C(41)-C(40)   | 115.8(2) |
| C(41)-N(41)-C(42)   | 126.5(2) |

|                   |            |
|-------------------|------------|
| C(41)-N(41)-H(41) | 116.7      |
| C(42)-N(41)-H(41) | 116.7      |
| C(43)-C(42)-C(47) | 119.2(3)   |
| C(43)-C(42)-N(41) | 123.2(3)   |
| C(47)-C(42)-N(41) | 117.5(2)   |
| C(44)-C(43)-C(42) | 120.3(3)   |
| C(44)-C(43)-H(43) | 119.9      |
| C(42)-C(43)-H(43) | 119.9      |
| C(43)-C(44)-C(45) | 120.3(3)   |
| C(43)-C(44)-H(44) | 119.9      |
| C(45)-C(44)-H(44) | 119.9      |
| C(44)-C(45)-C(46) | 120.2(3)   |
| C(44)-C(45)-I(45) | 118.5(2)   |
| C(46)-C(45)-I(45) | 121.30(19) |
| C(45)-C(46)-C(47) | 119.5(2)   |
| C(45)-C(46)-H(46) | 120.3      |
| C(47)-C(46)-H(46) | 120.3      |
| C(46)-C(47)-C(42) | 120.6(2)   |
| C(46)-C(47)-H(47) | 119.7      |
| C(42)-C(47)-H(47) | 119.7      |
| C(53)-C(48)-C(49) | 118.0(3)   |
| C(53)-C(48)-C(32) | 119.0(2)   |
| C(49)-C(48)-C(32) | 123.0(2)   |
| C(50)-C(49)-C(48) | 120.8(3)   |
| C(50)-C(49)-H(49) | 119.6      |
| C(48)-C(49)-H(49) | 119.6      |
| C(51)-C(50)-C(49) | 120.5(3)   |
| C(51)-C(50)-H(50) | 119.7      |
| C(49)-C(50)-H(50) | 119.7      |
| C(52)-C(51)-C(50) | 119.4(3)   |
| C(52)-C(51)-H(51) | 120.3      |
| C(50)-C(51)-H(51) | 120.3      |
| C(51)-C(52)-C(53) | 120.3(3)   |
| C(51)-C(52)-H(52) | 119.9      |
| C(53)-C(52)-H(52) | 119.9      |
| C(52)-C(53)-C(48) | 121.0(3)   |

C(52)-C(53)-H(53) 119.5  
 C(48)-C(53)-H(53) 119.5

---

Symmetry transformations used to generate equivalent atoms:

**Table 4. Anisotropic displacement parameters ( $\text{\AA}^2 \times 10^3$ ) for JF2873FF. The anisotropic displacement factor exponent takes the form:  $-2 \square^2 [ h^2 a^* 2U^{11} + \dots + 2 h k a^* b^* U^{12} ]$**

---

|       | U <sup>11</sup> | U <sup>22</sup> | U <sup>33</sup> | U <sup>23</sup> | U <sup>13</sup> | U <sup>12</sup> |
|-------|-----------------|-----------------|-----------------|-----------------|-----------------|-----------------|
| C(1)  | 14(1)           | 15(1)           | 15(1)           | 4(1)            | 3(1)            | 3(1)            |
| O(1)  | 17(1)           | 19(1)           | 22(1)           | 8(1)            | 7(1)            | 4(1)            |
| C(2)  | 18(1)           | 16(1)           | 14(1)           | 4(1)            | 2(1)            | 2(1)            |
| C(3)  | 13(1)           | 19(1)           | 14(1)           | 2(1)            | -1(1)           | -2(1)           |
| C(4)  | 19(2)           | 22(2)           | 19(2)           | 5(1)            | 0(1)            | -4(1)           |
| C(5)  | 19(1)           | 30(1)           | 20(1)           | 4(1)            | 4(1)            | -7(1)           |
| C(6)  | 14(1)           | 31(1)           | 22(1)           | -2(1)           | 4(1)            | -1(1)           |
| C(7)  | 18(1)           | 23(1)           | 24(1)           | 2(1)            | 2(1)            | 1(1)            |
| C(8)  | 17(1)           | 20(1)           | 14(1)           | 2(1)            | 3(1)            | -1(1)           |
| C(9)  | 23(1)           | 23(1)           | 17(1)           | 2(1)            | 1(1)            | -4(1)           |
| C(10) | 17(1)           | 16(1)           | 16(1)           | 5(1)            | 3(1)            | 1(1)            |
| C(11) | 16(1)           | 14(1)           | 13(1)           | 2(1)            | 3(1)            | 3(1)            |
| N(11) | 13(1)           | 16(1)           | 19(1)           | 6(1)            | 1(1)            | 1(1)            |
| O(11) | 14(1)           | 22(1)           | 22(1)           | 9(1)            | 3(1)            | 3(1)            |
| C(12) | 15(1)           | 14(1)           | 16(1)           | 3(1)            | 5(1)            | 3(1)            |
| C(13) | 13(1)           | 18(1)           | 17(1)           | 3(1)            | 2(1)            | 1(1)            |
| C(14) | 19(1)           | 20(1)           | 15(1)           | 4(1)            | 3(1)            | 4(1)            |
| C(15) | 22(1)           | 13(1)           | 19(1)           | 4(1)            | 7(1)            | 2(1)            |
| I(15) | 30(1)           | 18(1)           | 25(1)           | 8(1)            | 7(1)            | 0(1)            |
| C(16) | 20(2)           | 15(1)           | 22(2)           | 2(1)            | 0(1)            | -2(1)           |
| C(17) | 19(2)           | 20(2)           | 18(2)           | 3(1)            | 0(1)            | 2(1)            |
| C(18) | 17(1)           | 23(1)           | 22(1)           | 12(1)           | 6(1)            | 3(1)            |
| C(19) | 28(2)           | 24(1)           | 40(2)           | 15(1)           | 16(1)           | 6(1)            |



|       |       |       |       |       |       |       |
|-------|-------|-------|-------|-------|-------|-------|
| C(20) | 27(2) | 28(2) | 78(3) | 31(2) | 20(2) | 12(2) |
| C(21) | 19(2) | 52(2) | 69(3) | 47(2) | 2(2)  | 2(2)  |
| C(22) | 20(2) | 49(2) | 39(2) | 30(2) | -3(2) | -4(2) |
| C(23) | 20(1) | 36(2) | 24(1) | 14(1) | 2(1)  | 3(1)  |
| C(31) | 15(1) | 16(1) | 16(1) | 4(1)  | 2(1)  | 1(1)  |
| O(31) | 17(1) | 20(1) | 21(1) | 6(1)  | -2(1) | -2(1) |
| C(32) | 15(1) | 16(1) | 16(1) | 4(1)  | 3(1)  | 4(1)  |
| C(33) | 17(1) | 21(1) | 17(1) | 1(1)  | 4(1)  | 6(1)  |
| C(34) | 23(2) | 30(2) | 20(2) | 9(1)  | 4(1)  | 9(1)  |
| C(35) | 20(1) | 36(2) | 22(1) | 4(1)  | 0(1)  | 12(1) |
| C(36) | 17(1) | 32(2) | 26(1) | -3(1) | -2(1) | 4(1)  |
| C(37) | 20(1) | 23(1) | 26(1) | 0(1)  | 1(1)  | 1(1)  |
| C(38) | 18(2) | 20(1) | 16(1) | 1(1)  | 1(1)  | 5(1)  |
| C(39) | 24(1) | 19(1) | 19(1) | 2(1)  | 2(1)  | 6(1)  |
| C(40) | 16(1) | 15(1) | 16(1) | 3(1)  | 1(1)  | 0(1)  |
| C(41) | 15(1) | 14(1) | 17(1) | 2(1)  | -1(1) | -2(1) |
| N(41) | 13(1) | 17(1) | 17(1) | 5(1)  | 3(1)  | 0(1)  |
| O(41) | 14(1) | 23(1) | 23(1) | 9(1)  | 2(1)  | 0(1)  |
| C(42) | 13(1) | 15(1) | 15(1) | 2(1)  | -1(1) | -3(1) |
| C(43) | 20(2) | 16(1) | 18(1) | 2(1)  | 6(1)  | -2(1) |
| C(44) | 23(2) | 18(2) | 21(2) | -1(1) | 5(1)  | 2(1)  |
| C(45) | 21(1) | 14(1) | 19(1) | 4(1)  | -1(1) | -1(1) |
| I(45) | 32(1) | 18(1) | 26(1) | 8(1)  | 1(1)  | 3(1)  |
| C(46) | 18(1) | 20(1) | 16(1) | 3(1)  | 0(1)  | -3(1) |
| C(47) | 12(1) | 18(1) | 16(1) | 2(1)  | 1(1)  | -2(1) |
| C(48) | 15(1) | 19(1) | 22(1) | 9(1)  | 3(1)  | 6(1)  |
| C(49) | 24(1) | 25(1) | 24(1) | 7(1)  | 6(1)  | 7(1)  |
| C(50) | 24(2) | 41(2) | 24(2) | 15(2) | 9(1)  | 12(1) |
| C(51) | 20(1) | 38(2) | 35(2) | 24(1) | 5(1)  | 5(1)  |
| C(52) | 25(2) | 30(2) | 32(2) | 15(1) | -1(1) | -2(1) |
| C(53) | 22(1) | 23(1) | 23(1) | 9(1)  | 2(1)  | 3(1)  |

**Table 5. Hydrogen coordinates ( x 10<sup>4</sup>) and isotropic displacement parameters (Å<sup>2</sup>x 10<sup>3</sup>) for JF2873FF.**

---



---

|        | x     | y     | z    | U(eq)  |
|--------|-------|-------|------|--------|
| H(2)   | 2275  | 8211  | 2879 | 17(8)  |
| H(4)   | 3688  | 8585  | 775  | 32(10) |
| H(5)   | 5922  | 7541  | 179  | 44(11) |
| H(6)   | 6885  | 5392  | 789  | 22(8)  |
| H(7)   | 5567  | 4145  | 1930 | 23(8)  |
| H(9A)  | 652   | 4714  | 1215 | 36(10) |
| H(9B)  | -666  | 5330  | 1925 | 22(9)  |
| H(9C)  | 278   | 3889  | 2181 | 26(9)  |
| H(10A) | 2025  | 6687  | 4281 | 24(9)  |
| H(10B) | 356   | 7140  | 3840 | 13(7)  |
| H(11)  | 2343  | 4535  | 4894 | 30(10) |
| H(13)  | 2762  | 3207  | 6374 | 32(10) |
| H(14)  | 2263  | 1012  | 7085 | 20(8)  |
| H(16)  | -1246 | -195  | 4776 | 30(9)  |
| H(17)  | -788  | 2044  | 4084 | 28(9)  |
| H(19)  | 196   | 9800  | 2797 | 25(9)  |
| H(20)  | -1604 | 11013 | 1781 | 39(11) |
| H(21)  | -2227 | 10075 | -17  | 64(15) |
| H(22)  | -1061 | 7898  | -803 | 37(11) |
| H(23)  | 758   | 6706  | 210  | 32(10) |
| H(32)  | 8055  | 1887  | 6873 | 12(4)  |
| H(34)  | 9829  | 1611  | 9153 | 41(11) |
| H(35)  | 12218 | 2754  | 9841 | 26(9)  |
| H(36)  | 13132 | 4871  | 9206 | 42(11) |
| H(37)  | 11616 | 5969  | 7924 | 27(9)  |
| H(39A) | 6993  | 5336  | 8554 | 19(8)  |
| H(39B) | 5414  | 4703  | 7873 | 30(10) |
| H(39C) | 6306  | 6149  | 7595 | 25(9)  |
| H(40A) | 7289  | 3440  | 5471 | 56(13) |
| H(40B) | 5777  | 2879  | 5910 | 29(9)  |

|       |      |       |       |        |
|-------|------|-------|-------|--------|
| H(41) | 7320 | 5571  | 4829  | 26(9)  |
| H(43) | 4318 | 7852  | 5616  | 21(8)  |
| H(44) | 3612 | 10044 | 4942  | 32(10) |
| H(46) | 6646 | 9209  | 2771  | 23(8)  |
| H(47) | 7375 | 7019  | 3462  | 18(8)  |
| H(49) | 6716 | 3218  | 9425  | 33(10) |
| H(50) | 4917 | 1869  | 10158 | 37(13) |
| H(51) | 3724 | -368  | 9201  | 42(11) |
| H(52) | 4429 | -1319 | 7532  | 23(9)  |
| H(53) | 6211 | 32    | 6781  | 27(9)  |

**Table 6. Torsion angles [°] for JF2873FF.**

|                       |           |
|-----------------------|-----------|
| C(9)-C(1)-O(1)-C(8)   | 98.6(2)   |
| C(10)-C(1)-O(1)-C(8)  | -139.1(2) |
| C(2)-C(1)-O(1)-C(8)   | -22.4(3)  |
| O(1)-C(1)-C(2)-C(3)   | 23.0(2)   |
| C(9)-C(1)-C(2)-C(3)   | -93.0(2)  |
| C(10)-C(1)-C(2)-C(3)  | 138.1(2)  |
| O(1)-C(1)-C(2)-C(18)  | 149.7(2)  |
| C(9)-C(1)-C(2)-C(18)  | 33.8(3)   |
| C(10)-C(1)-C(2)-C(18) | -95.2(3)  |
| C(18)-C(2)-C(3)-C(8)  | -144.9(2) |
| C(1)-C(2)-C(3)-C(8)   | -16.3(3)  |
| C(18)-C(2)-C(3)-C(4)  | 40.0(4)   |
| C(1)-C(2)-C(3)-C(4)   | 168.6(3)  |
| C(8)-C(3)-C(4)-C(5)   | 0.0(5)    |
| C(2)-C(3)-C(4)-C(5)   | 174.7(3)  |
| C(3)-C(4)-C(5)-C(6)   | -1.4(5)   |
| C(4)-C(5)-C(6)-C(7)   | 1.9(4)    |
| C(5)-C(6)-C(7)-C(8)   | -0.9(4)   |
| C(1)-O(1)-C(8)-C(7)   | -169.3(3) |
| C(1)-O(1)-C(8)-C(3)   | 12.9(3)   |
| C(6)-C(7)-C(8)-O(1)   | -178.0(3) |

|                         |             |
|-------------------------|-------------|
| C(6)-C(7)-C(8)-C(3)     | -0.5(4)     |
| C(4)-C(3)-C(8)-O(1)     | 178.8(3)    |
| C(2)-C(3)-C(8)-O(1)     | 3.0(3)      |
| C(4)-C(3)-C(8)-C(7)     | 0.9(4)      |
| C(2)-C(3)-C(8)-C(7)     | -174.8(3)   |
| O(1)-C(1)-C(10)-C(11)   | -78.3(3)    |
| C(9)-C(1)-C(10)-C(11)   | 39.6(3)     |
| C(2)-C(1)-C(10)-C(11)   | 168.7(2)    |
| C(1)-C(10)-C(11)-O(11)  | -84.5(3)    |
| C(1)-C(10)-C(11)-N(11)  | 94.4(3)     |
| O(11)-C(11)-N(11)-C(12) | 3.2(4)      |
| C(10)-C(11)-N(11)-C(12) | -175.7(2)   |
| C(11)-N(11)-C(12)-C(17) | 28.2(4)     |
| C(11)-N(11)-C(12)-C(13) | -154.0(3)   |
| C(17)-C(12)-C(13)-C(14) | -1.3(4)     |
| N(11)-C(12)-C(13)-C(14) | -179.1(2)   |
| C(12)-C(13)-C(14)-C(15) | 1.1(4)      |
| C(13)-C(14)-C(15)-C(16) | 0.0(4)      |
| C(13)-C(14)-C(15)-I(15) | -179.65(19) |
| C(14)-C(15)-C(16)-C(17) | -0.9(5)     |
| I(15)-C(15)-C(16)-C(17) | 178.8(3)    |
| C(13)-C(12)-C(17)-C(16) | 0.4(5)      |
| N(11)-C(12)-C(17)-C(16) | 178.2(3)    |
| C(15)-C(16)-C(17)-C(12) | 0.7(5)      |
| C(3)-C(2)-C(18)-C(23)   | 38.7(4)     |
| C(1)-C(2)-C(18)-C(23)   | -81.0(3)    |
| C(3)-C(2)-C(18)-C(19)   | -136.4(3)   |
| C(1)-C(2)-C(18)-C(19)   | 103.9(3)    |
| C(23)-C(18)-C(19)-C(20) | -0.1(4)     |
| C(2)-C(18)-C(19)-C(20)  | 175.1(3)    |
| C(18)-C(19)-C(20)-C(21) | 0.1(5)      |
| C(19)-C(20)-C(21)-C(22) | 0.2(5)      |
| C(20)-C(21)-C(22)-C(23) | -0.6(5)     |
| C(21)-C(22)-C(23)-C(18) | 0.6(5)      |
| C(19)-C(18)-C(23)-C(22) | -0.3(4)     |
| C(2)-C(18)-C(23)-C(22)  | -175.4(3)   |

|                         |           |
|-------------------------|-----------|
| C(39)-C(31)-O(31)-C(38) | 93.0(2)   |
| C(40)-C(31)-O(31)-C(38) | -144.1(2) |
| C(32)-C(31)-O(31)-C(38) | -27.2(2)  |
| O(31)-C(31)-C(32)-C(33) | 28.9(2)   |
| C(39)-C(31)-C(32)-C(33) | -85.9(2)  |
| C(40)-C(31)-C(32)-C(33) | 144.4(2)  |
| O(31)-C(31)-C(32)-C(48) | 157.6(2)  |
| C(39)-C(31)-C(32)-C(48) | 42.8(3)   |
| C(40)-C(31)-C(32)-C(48) | -86.9(3)  |
| C(48)-C(32)-C(33)-C(34) | 36.4(4)   |
| C(31)-C(32)-C(33)-C(34) | 165.7(3)  |
| C(48)-C(32)-C(33)-C(38) | -150.5(2) |
| C(31)-C(32)-C(33)-C(38) | -21.3(3)  |
| C(38)-C(33)-C(34)-C(35) | 0.2(5)    |
| C(32)-C(33)-C(34)-C(35) | 172.5(3)  |
| C(33)-C(34)-C(35)-C(36) | -1.8(5)   |
| C(34)-C(35)-C(36)-C(37) | 1.7(5)    |
| C(35)-C(36)-C(37)-C(38) | 0.1(4)    |
| C(31)-O(31)-C(38)-C(37) | -167.8(3) |
| C(31)-O(31)-C(38)-C(33) | 14.6(3)   |
| C(36)-C(37)-C(38)-O(31) | -179.2(3) |
| C(36)-C(37)-C(38)-C(33) | -1.8(4)   |
| C(34)-C(33)-C(38)-O(31) | 179.4(3)  |
| C(32)-C(33)-C(38)-O(31) | 5.3(3)    |
| C(34)-C(33)-C(38)-C(37) | 1.7(5)    |
| C(32)-C(33)-C(38)-C(37) | -172.4(3) |
| O(31)-C(31)-C(40)-C(41) | -82.2(3)  |
| C(39)-C(31)-C(40)-C(41) | 35.9(3)   |
| C(32)-C(31)-C(40)-C(41) | 165.6(2)  |
| C(31)-C(40)-C(41)-O(41) | -81.9(3)  |
| C(31)-C(40)-C(41)-N(41) | 97.5(3)   |
| O(41)-C(41)-N(41)-C(42) | 3.6(5)    |
| C(40)-C(41)-N(41)-C(42) | -175.8(2) |
| C(41)-N(41)-C(42)-C(43) | 21.4(4)   |
| C(41)-N(41)-C(42)-C(47) | -160.9(3) |
| C(47)-C(42)-C(43)-C(44) | 0.6(5)    |

|                         |             |
|-------------------------|-------------|
| N(41)-C(42)-C(43)-C(44) | 178.3(3)    |
| C(42)-C(43)-C(44)-C(45) | 0.1(5)      |
| C(43)-C(44)-C(45)-C(46) | -0.5(5)     |
| C(43)-C(44)-C(45)-I(45) | 178.2(3)    |
| C(44)-C(45)-C(46)-C(47) | 0.1(4)      |
| I(45)-C(45)-C(46)-C(47) | -178.50(19) |
| C(45)-C(46)-C(47)-C(42) | 0.6(4)      |
| C(43)-C(42)-C(47)-C(46) | -1.0(4)     |
| N(41)-C(42)-C(47)-C(46) | -178.8(2)   |
| C(33)-C(32)-C(48)-C(53) | -131.4(3)   |
| C(31)-C(32)-C(48)-C(53) | 108.0(3)    |
| C(33)-C(32)-C(48)-C(49) | 46.2(3)     |
| C(31)-C(32)-C(48)-C(49) | -74.4(3)    |
| C(53)-C(48)-C(49)-C(50) | -1.9(4)     |
| C(32)-C(48)-C(49)-C(50) | -179.6(3)   |
| C(48)-C(49)-C(50)-C(51) | 0.3(5)      |
| C(49)-C(50)-C(51)-C(52) | 1.6(5)      |
| C(50)-C(51)-C(52)-C(53) | -2.0(5)     |
| C(51)-C(52)-C(53)-C(48) | 0.3(5)      |
| C(49)-C(48)-C(53)-C(52) | 1.6(4)      |
| C(32)-C(48)-C(53)-C(52) | 179.3(3)    |

---

Symmetry transformations used to generate equivalent atoms:

**Table 7. Hydrogen bonds for JF2873FF [Å and °].**

---

| D-H...A               | d(D-H) | d(H...A) | d(D...A) | <(DHA) |
|-----------------------|--------|----------|----------|--------|
| N(41)-H(41)...O(11)#1 | 0.88   | 2.01     | 2.860(3) | 162    |
| N(11)-H(11)...O(41)   | 0.88   | 2.06     | 2.890(3) | 156    |
| C(13)-H(13)...O(41)   | 0.95   | 2.57     | 3.320(3) | 136    |
| C(17)-H(17)...O(11)   | 0.95   | 2.34     | 2.858(5) | 114    |
| N(41)-H(41)...O(11)#1 | 0.88   | 2.01     | 2.860(3) | 162    |
| C(43)-H(43)...O(41)   | 0.95   | 2.30     | 2.852(4) | 117    |

---

—  
Symmetry transformations used to generate equivalent atoms:

#1  $x+1,y,z$

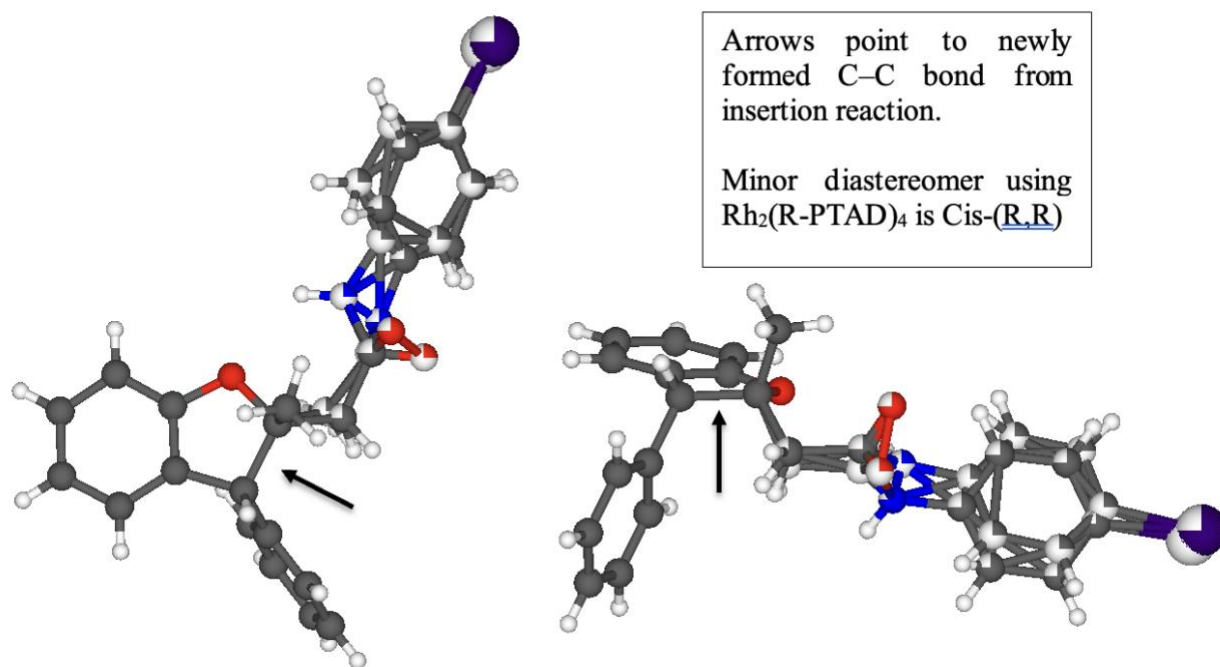

**Table 1. Crystal data and structure refinement for  $[\text{C}_{23}\text{H}_{20}\text{INO}_2]$ .**

|                                 |                                                                                                                                                                 |
|---------------------------------|-----------------------------------------------------------------------------------------------------------------------------------------------------------------|
| Identification code             | JF2892FMI (SND-II-011-MINOR)                                                                                                                                    |
| Empirical formula               | $\text{C}_{23} \text{H}_{20} \text{I} \text{N} \text{O}_2$                                                                                                      |
| Formula weight                  | 469.30                                                                                                                                                          |
| Temperature                     | 100(2) K                                                                                                                                                        |
| Wavelength                      | 0.71073 Å                                                                                                                                                       |
| Crystal system                  | Orthorhombic                                                                                                                                                    |
| Space group                     | Pbca                                                                                                                                                            |
| Unit cell dimensions            | $a = 14.3788(8) \text{ \AA}$ $\square = 90^\circ$ .<br>$b = 7.5241(5) \text{ \AA}$ $\square = 90^\circ$ .<br>$c = 35.493(2) \text{ \AA}$ $\square = 90^\circ$ . |
| Volume                          | $3839.9(4) \text{ \AA}^3$                                                                                                                                       |
| Z                               | 8                                                                                                                                                               |
| Density (calculated)            | $1.624 \text{ Mg/m}^3$                                                                                                                                          |
| Absorption coefficient          | $1.686 \text{ mm}^{-1}$                                                                                                                                         |
| F(000)                          | 1872                                                                                                                                                            |
| Crystal size                    | $0.303 \times 0.182 \times 0.104 \text{ mm}^3$                                                                                                                  |
| Crystal color and habit         | Yellow Block                                                                                                                                                    |
| Diffractometer                  | Bruker Photon100 CMOS                                                                                                                                           |
| Theta range for data collection | $2.697$ to $27.537^\circ$ .                                                                                                                                     |
| Index ranges                    | $-18 \leq h \leq 18$ , $-9 \leq k \leq 9$ , $-45 \leq l \leq 46$                                                                                                |



|                                      |                                                                             |
|--------------------------------------|-----------------------------------------------------------------------------|
| Reflections collected                | 32003                                                                       |
| Independent reflections              | 4415 [R(int) = 0.0203]                                                      |
| Observed reflections (I > 2sigma(I)) | 3980                                                                        |
| Completeness to theta = 25.242°      | 99.9 %                                                                      |
| Absorption correction                | Semi-empirical from equivalents                                             |
| Max. and min. transmission           | 0.7785 and 0.6939                                                           |
| Solution method                      | SHELXT (Sheldrick, 2014)                                                    |
| Refinement method                    | SHELXL-2018/3 (Sheldrick, 2018) Full-matrix least-squares on F <sup>2</sup> |
| Data / restraints / parameters       | 4415 / 22 / 334                                                             |
| Goodness-of-fit on F <sup>2</sup>    | 1.155                                                                       |
| Final R indices [I>2sigma(I)]        | R1 = 0.0359, wR2 = 0.0715                                                   |
| R indices (all data)                 | R1 = 0.0403, wR2 = 0.0738                                                   |
| Extinction coefficient               | 0.00564(15)                                                                 |
| Largest diff. peak and hole          | 0.758 and -0.738 e.Å <sup>-3</sup>                                          |

**Table 2. Atomic coordinates ( x 10<sup>4</sup>) and equivalent isotropic displacement parameters (Å<sup>2</sup>x 10<sup>3</sup>) for JF2892FMI. U(eq) is defined as one third of the trace of the orthogonalized U<sup>ij</sup> tensor.**

|      | x       | y       | z       | U(eq) |
|------|---------|---------|---------|-------|
| C(1) | 4736(2) | 4616(4) | 3501(1) | 36(1) |
| O(1) | 4978(1) | 3739(3) | 3857(1) | 39(1) |
| C(2) | 5137(2) | 3371(4) | 3182(1) | 38(1) |
| C(3) | 5812(2) | 2259(4) | 3404(1) | 40(1) |
| C(4) | 6474(2) | 1035(4) | 3287(1) | 53(1) |
| C(5) | 6983(2) | 106(4)  | 3555(1) | 59(1) |
| C(6) | 6825(2) | 390(4)  | 3931(1) | 55(1) |
| C(7) | 6163(2) | 1615(4) | 4054(1) | 46(1) |
| C(8) | 5668(2) | 2518(4) | 3782(1) | 37(1) |
| C(9) | 5250(2) | 6377(4) | 3492(1) | 46(1) |

|        |          |          |         |       |
|--------|----------|----------|---------|-------|
| C(10)  | 3680(3)  | 4938(6)  | 3474(1) | 36(1) |
| C(11)  | 3312(3)  | 6057(6)  | 3792(1) | 33(1) |
| N(11)  | 2694(2)  | 5241(4)  | 4017(1) | 37(1) |
| O(11)  | 3527(2)  | 7630(4)  | 3827(1) | 46(1) |
| C(12)  | 2265(2)  | 5991(4)  | 4340(1) | 37(1) |
| C(13)  | 2799(2)  | 6861(4)  | 4610(1) | 39(1) |
| C(14)  | 2379(2)  | 7560(5)  | 4930(1) | 40(1) |
| C(15)  | 1424(2)  | 7390(5)  | 4980(1) | 41(1) |
| C(16)  | 890(2)   | 6521(5)  | 4711(1) | 43(1) |
| C(17)  | 1311(2)  | 5821(4)  | 4391(1) | 43(1) |
| I(15)  | 789(1)   | 8762(2)  | 5447(1) | 42(1) |
| C(10B) | 3669(6)  | 4276(17) | 3559(4) | 32(2) |
| C(11B) | 3138(10) | 5541(16) | 3818(3) | 31(2) |
| N(11B) | 3231(6)  | 5274(11) | 4188(2) | 30(2) |
| O(11B) | 2721(5)  | 6826(10) | 3689(2) | 41(2) |
| C(12B) | 2657(6)  | 6144(10) | 4463(2) | 25(2) |
| C(13B) | 3079(4)  | 6803(11) | 4786(2) | 35(2) |
| C(14B) | 2543(5)  | 7597(13) | 5065(2) | 29(3) |
| C(15B) | 1585(5)  | 7733(13) | 5021(2) | 28(3) |
| C(16B) | 1163(4)  | 7074(11) | 4697(2) | 25(2) |
| C(17B) | 1699(6)  | 6280(10) | 4418(2) | 29(2) |
| I(15B) | 779(3)   | 8308(5)  | 5436(1) | 73(1) |
| C(18)  | 4443(2)  | 2259(4)  | 2964(1) | 36(1) |
| C(19)  | 4057(2)  | 722(4)   | 3115(1) | 36(1) |
| C(20)  | 3422(2)  | -269(4)  | 2910(1) | 39(1) |
| C(21)  | 3170(2)  | 262(4)   | 2552(1) | 43(1) |
| C(22)  | 3548(2)  | 1783(4)  | 2398(1) | 49(1) |
| C(23)  | 4182(2)  | 2775(4)  | 2602(1) | 46(1) |

**Table 3. Bond lengths [Å] and angles [°] for JF2892FMI.**

|             |          |
|-------------|----------|
| C(1)-O(1)   | 1.467(3) |
| C(1)-C(9)   | 1.518(4) |
| C(1)-C(10)  | 1.540(4) |
| C(1)-C(10B) | 1.569(8) |

|              |          |
|--------------|----------|
| C(1)-C(2)    | 1.578(4) |
| O(1)-C(8)    | 1.378(3) |
| C(2)-C(3)    | 1.503(4) |
| C(2)-C(18)   | 1.515(4) |
| C(2)-H(2)    | 1.0000   |
| C(3)-C(8)    | 1.373(4) |
| C(3)-C(4)    | 1.388(4) |
| C(4)-C(5)    | 1.389(5) |
| C(4)-H(4)    | 0.9500   |
| C(5)-C(6)    | 1.371(5) |
| C(5)-H(5)    | 0.9500   |
| C(6)-C(7)    | 1.395(4) |
| C(6)-H(6)    | 0.9500   |
| C(7)-C(8)    | 1.379(4) |
| C(7)-H(7)    | 0.9500   |
| C(9)-H(9A)   | 0.9800   |
| C(9)-H(9B)   | 0.9800   |
| C(9)-H(9C)   | 0.9800   |
| C(10)-C(11)  | 1.502(7) |
| C(10)-H(10A) | 0.9900   |
| C(10)-H(10B) | 0.9900   |
| C(11)-O(11)  | 1.229(5) |
| C(11)-N(11)  | 1.346(5) |
| N(11)-C(12)  | 1.418(4) |
| N(11)-H(11)  | 0.8800   |
| C(12)-C(13)  | 1.3900   |
| C(12)-C(17)  | 1.3900   |
| C(13)-C(14)  | 1.3900   |
| C(13)-H(13)  | 0.9500   |
| C(14)-C(15)  | 1.3900   |
| C(14)-H(14)  | 0.9500   |
| C(15)-C(16)  | 1.3900   |
| C(15)-I(15)  | 2.155(3) |
| C(16)-C(17)  | 1.3900   |
| C(16)-H(16)  | 0.9500   |
| C(17)-H(17)  | 0.9500   |

|                  |           |
|------------------|-----------|
| C(10B)-C(11B)    | 1.529(18) |
| C(10B)-H(10C)    | 0.9900    |
| C(10B)-H(10D)    | 0.9900    |
| C(11B)-O(11B)    | 1.227(10) |
| C(11B)-N(11B)    | 1.335(9)  |
| N(11B)-C(12B)    | 1.434(7)  |
| N(11B)-H(11B)    | 0.8800    |
| C(12B)-C(13B)    | 1.3900    |
| C(12B)-C(17B)    | 1.3900    |
| C(13B)-C(14B)    | 1.3900    |
| C(13B)-H(13B)    | 0.9500    |
| C(14B)-C(15B)    | 1.3900    |
| C(14B)-H(14B)    | 0.9500    |
| C(15B)-C(16B)    | 1.3900    |
| C(15B)-I(15B)    | 1.925(6)  |
| C(16B)-C(17B)    | 1.3900    |
| C(16B)-H(16B)    | 0.9500    |
| C(17B)-H(17B)    | 0.9500    |
| C(18)-C(19)      | 1.391(4)  |
| C(18)-C(23)      | 1.392(4)  |
| C(19)-C(20)      | 1.387(4)  |
| C(19)-H(19)      | 0.9500    |
| C(20)-C(21)      | 1.380(4)  |
| C(20)-H(20)      | 0.9500    |
| C(21)-C(22)      | 1.379(5)  |
| C(21)-H(21)      | 0.9500    |
| C(22)-C(23)      | 1.382(4)  |
| C(22)-H(22)      | 0.9500    |
| C(23)-H(23)      | 0.9500    |
| O(1)-C(1)-C(9)   | 107.2(2)  |
| O(1)-C(1)-C(10)  | 110.9(3)  |
| C(9)-C(1)-C(10)  | 110.0(3)  |
| O(1)-C(1)-C(10B) | 92.6(5)   |
| C(9)-C(1)-C(10B) | 128.4(5)  |
| O(1)-C(1)-C(2)   | 105.3(2)  |

|                    |          |
|--------------------|----------|
| C(9)-C(1)-C(2)     | 109.0(2) |
| C(10)-C(1)-C(2)    | 114.2(3) |
| C(10B)-C(1)-C(2)   | 110.7(6) |
| C(8)-O(1)-C(1)     | 107.7(2) |
| C(3)-C(2)-C(18)    | 112.7(2) |
| C(3)-C(2)-C(1)     | 101.0(2) |
| C(18)-C(2)-C(1)    | 117.0(2) |
| C(3)-C(2)-H(2)     | 108.6    |
| C(18)-C(2)-H(2)    | 108.6    |
| C(1)-C(2)-H(2)     | 108.6    |
| C(8)-C(3)-C(4)     | 119.3(3) |
| C(8)-C(3)-C(2)     | 109.6(2) |
| C(4)-C(3)-C(2)     | 131.0(3) |
| C(3)-C(4)-C(5)     | 119.5(3) |
| C(3)-C(4)-H(4)     | 120.3    |
| C(5)-C(4)-H(4)     | 120.3    |
| C(6)-C(5)-C(4)     | 120.0(3) |
| C(6)-C(5)-H(5)     | 120.0    |
| C(4)-C(5)-H(5)     | 120.0    |
| C(5)-C(6)-C(7)     | 121.4(3) |
| C(5)-C(6)-H(6)     | 119.3    |
| C(7)-C(6)-H(6)     | 119.3    |
| C(8)-C(7)-C(6)     | 117.3(3) |
| C(8)-C(7)-H(7)     | 121.4    |
| C(6)-C(7)-H(7)     | 121.4    |
| C(3)-C(8)-O(1)     | 113.1(3) |
| C(3)-C(8)-C(7)     | 122.5(3) |
| O(1)-C(8)-C(7)     | 124.4(3) |
| C(1)-C(9)-H(9A)    | 109.5    |
| C(1)-C(9)-H(9B)    | 109.5    |
| H(9A)-C(9)-H(9B)   | 109.5    |
| C(1)-C(9)-H(9C)    | 109.5    |
| H(9A)-C(9)-H(9C)   | 109.5    |
| H(9B)-C(9)-H(9C)   | 109.5    |
| C(11)-C(10)-C(1)   | 113.0(3) |
| C(11)-C(10)-H(10A) | 109.0    |

|                      |            |
|----------------------|------------|
| C(1)-C(10)-H(10A)    | 109.0      |
| C(11)-C(10)-H(10B)   | 109.0      |
| C(1)-C(10)-H(10B)    | 109.0      |
| H(10A)-C(10)-H(10B)  | 107.8      |
| O(11)-C(11)-N(11)    | 123.1(4)   |
| O(11)-C(11)-C(10)    | 121.8(4)   |
| N(11)-C(11)-C(10)    | 115.0(4)   |
| C(11)-N(11)-C(12)    | 125.9(3)   |
| C(11)-N(11)-H(11)    | 117.1      |
| C(12)-N(11)-H(11)    | 117.1      |
| C(13)-C(12)-C(17)    | 120.0      |
| C(13)-C(12)-N(11)    | 120.2(3)   |
| C(17)-C(12)-N(11)    | 119.8(3)   |
| C(14)-C(13)-C(12)    | 120.0      |
| C(14)-C(13)-H(13)    | 120.0      |
| C(12)-C(13)-H(13)    | 120.0      |
| C(13)-C(14)-C(15)    | 120.0      |
| C(13)-C(14)-H(14)    | 120.0      |
| C(15)-C(14)-H(14)    | 120.0      |
| C(14)-C(15)-C(16)    | 120.0      |
| C(14)-C(15)-I(15)    | 118.27(18) |
| C(16)-C(15)-I(15)    | 121.34(19) |
| C(17)-C(16)-C(15)    | 120.0      |
| C(17)-C(16)-H(16)    | 120.0      |
| C(15)-C(16)-H(16)    | 120.0      |
| C(16)-C(17)-C(12)    | 120.0      |
| C(16)-C(17)-H(17)    | 120.0      |
| C(12)-C(17)-H(17)    | 120.0      |
| C(11B)-C(10B)-C(1)   | 117.8(10)  |
| C(11B)-C(10B)-H(10C) | 107.9      |
| C(1)-C(10B)-H(10C)   | 107.9      |
| C(11B)-C(10B)-H(10D) | 107.9      |
| C(1)-C(10B)-H(10D)   | 107.9      |
| H(10C)-C(10B)-H(10D) | 107.2      |
| O(11B)-C(11B)-N(11B) | 122.4(12)  |
| O(11B)-C(11B)-C(10B) | 120.5(10)  |

N(11B)-C(11B)-C(10B) 116.7(9)  
C(11B)-N(11B)-C(12B) 122.8(9)  
C(11B)-N(11B)-H(11B) 118.6  
C(12B)-N(11B)-H(11B) 118.6  
C(13B)-C(12B)-C(17B) 120.0  
C(13B)-C(12B)-N(11B) 118.2(7)  
C(17B)-C(12B)-N(11B) 121.8(7)  
C(12B)-C(13B)-C(14B) 120.0  
C(12B)-C(13B)-H(13B) 120.0  
C(14B)-C(13B)-H(13B) 120.0  
C(13B)-C(14B)-C(15B) 120.0  
C(13B)-C(14B)-H(14B) 120.0  
C(15B)-C(14B)-H(14B) 120.0  
C(16B)-C(15B)-C(14B) 120.0  
C(16B)-C(15B)-I(15B) 116.7(5)  
C(14B)-C(15B)-I(15B) 121.8(5)  
C(15B)-C(16B)-C(17B) 120.0  
C(15B)-C(16B)-H(16B) 120.0  
C(17B)-C(16B)-H(16B) 120.0  
C(16B)-C(17B)-C(12B) 120.0  
C(16B)-C(17B)-H(17B) 120.0  
C(12B)-C(17B)-H(17B) 120.0  
C(19)-C(18)-C(23) 118.8(3)  
C(19)-C(18)-C(2) 121.5(2)  
C(23)-C(18)-C(2) 119.7(3)  
C(20)-C(19)-C(18) 120.4(3)  
C(20)-C(19)-H(19) 119.8  
C(18)-C(19)-H(19) 119.8  
C(21)-C(20)-C(19) 120.1(3)  
C(21)-C(20)-H(20) 119.9  
C(19)-C(20)-H(20) 119.9  
C(22)-C(21)-C(20) 120.0(3)  
C(22)-C(21)-H(21) 120.0  
C(20)-C(21)-H(21) 120.0  
C(21)-C(22)-C(23) 120.1(3)  
C(21)-C(22)-H(22) 120.0

|                   |          |
|-------------------|----------|
| C(23)-C(22)-H(22) | 120.0    |
| C(22)-C(23)-C(18) | 120.7(3) |
| C(22)-C(23)-H(23) | 119.7    |
| C(18)-C(23)-H(23) | 119.7    |

Symmetry transformations used to generate equivalent atoms:

**Table 4. Anisotropic displacement parameters ( $\text{\AA}^2 \times 10^3$ ) for JF2892FMI. The anisotropic**

**displacement factor exponent takes the form:  $-2h^2 a^2 U^{11} + \dots + 2 h k a^* b^* U^{12}$  ]**

|        | U <sup>11</sup> | U <sup>22</sup> | U <sup>33</sup> | U <sup>23</sup> | U <sup>13</sup> | U <sup>12</sup> |
|--------|-----------------|-----------------|-----------------|-----------------|-----------------|-----------------|
| C(1)   | 35(1)           | 36(1)           | 38(1)           | -9(1)           | -2(1)           | -1(1)           |
| O(1)   | 37(1)           | 38(1)           | 41(1)           | 2(1)            | 10(1)           | 5(1)            |
| C(2)   | 40(1)           | 33(1)           | 43(2)           | -9(1)           | 10(1)           | -9(1)           |
| C(3)   | 30(1)           | 33(1)           | 56(2)           | -13(1)          | 5(1)            | -7(1)           |
| C(4)   | 36(2)           | 46(2)           | 77(2)           | -31(2)          | 9(2)            | -6(1)           |
| C(5)   | 31(2)           | 41(2)           | 104(3)          | -26(2)          | 2(2)            | 2(1)            |
| C(6)   | 34(2)           | 35(2)           | 95(3)           | 0(2)            | -1(2)           | -1(1)           |
| C(7)   | 38(2)           | 41(2)           | 60(2)           | 7(1)            | 5(1)            | -1(1)           |
| C(8)   | 27(1)           | 31(1)           | 54(2)           | -3(1)           | 9(1)            | -2(1)           |
| C(9)   | 69(2)           | 30(1)           | 38(1)           | -5(1)           | -7(1)           | -2(1)           |
| C(10)  | 35(2)           | 34(3)           | 39(2)           | 0(2)            | -8(2)           | 1(2)            |
| C(11)  | 23(2)           | 34(3)           | 41(2)           | 6(2)            | -3(1)           | -1(2)           |
| N(11)  | 39(2)           | 35(2)           | 38(2)           | 5(1)            | -7(2)           | -10(1)          |
| O(11)  | 39(1)           | 28(1)           | 71(2)           | 3(1)            | 16(1)           | 2(1)            |
| C(12)  | 29(2)           | 38(2)           | 44(2)           | 10(2)           | -8(2)           | -8(2)           |
| C(13)  | 35(2)           | 39(3)           | 43(3)           | 16(2)           | -7(2)           | -2(2)           |
| C(14)  | 43(2)           | 40(2)           | 37(3)           | 5(2)            | -13(2)          | -6(2)           |
| C(15)  | 38(2)           | 46(3)           | 40(3)           | 6(2)            | -5(2)           | 3(2)            |
| C(16)  | 33(2)           | 51(3)           | 46(2)           | 4(2)            | -11(2)          | -1(2)           |
| C(17)  | 39(3)           | 44(3)           | 47(2)           | 4(2)            | -18(2)          | -7(2)           |
| I(15)  | 37(1)           | 59(1)           | 29(1)           | -5(1)           | -4(1)           | 9(1)            |
| C(10B) | 31(3)           | 31(4)           | 35(4)           | -1(3)           | -8(3)           | 9(3)            |



|        |       |       |       |        |        |       |
|--------|-------|-------|-------|--------|--------|-------|
| C(11B) | 22(4) | 32(4) | 40(3) | 2(3)   | -2(3)  | -3(3) |
| N(11B) | 29(4) | 31(4) | 31(4) | 0(3)   | 2(3)   | 10(3) |
| O(11B) | 50(4) | 34(3) | 39(3) | -2(3)  | 9(3)   | 17(3) |
| C(12B) | 20(5) | 12(5) | 43(7) | -3(4)  | 10(5)  | 1(4)  |
| C(13B) | 39(6) | 28(5) | 40(6) | 15(5)  | 2(5)   | 14(5) |
| C(14B) | 28(5) | 37(6) | 22(5) | -2(5)  | -2(4)  | 2(4)  |
| C(15B) | 38(7) | 16(5) | 31(6) | 2(4)   | -2(5)  | -5(5) |
| C(16B) | 20(5) | 29(6) | 27(5) | -8(4)  | -3(4)  | -1(4) |
| C(17B) | 39(7) | 23(5) | 24(4) | -6(4)  | -10(5) | 5(5)  |
| I(15B) | 82(2) | 77(2) | 61(1) | 12(1)  | -11(1) | 18(1) |
| C(18)  | 46(2) | 30(1) | 31(1) | -5(1)  | 3(1)   | -4(1) |
| C(19)  | 41(1) | 35(1) | 31(1) | 0(1)   | -2(1)  | -3(1) |
| C(20)  | 39(1) | 29(1) | 49(2) | -1(1)  | -4(1)  | -1(1) |
| C(21)  | 48(2) | 41(2) | 41(2) | -13(1) | -12(1) | 7(1)  |
| C(22)  | 69(2) | 49(2) | 30(1) | -3(1)  | -8(1)  | 13(2) |
| C(23)  | 67(2) | 34(1) | 36(1) | 4(1)   | 4(1)   | 1(1)  |

**Table 5. Hydrogen coordinates (  $\times 10^4$ ) and isotropic displacement parameters ( $\text{\AA}^2 \times 10^3$ ) for JF2892FMI.**

|        | x    | y    | z    | U(eq)  |
|--------|------|------|------|--------|
| H(2)   | 5495 | 4118 | 3000 | 40(8)  |
| H(4)   | 6578 | 834  | 3026 | 52(10) |
| H(5)   | 7442 | -727 | 3477 | 64(11) |
| H(6)   | 7173 | -261 | 4111 | 61(11) |
| H(7)   | 6058 | 1819 | 4315 | 43(9)  |
| H(9A)  | 5072 | 7091 | 3711 | 56(10) |
| H(9B)  | 5089 | 7019 | 3261 | 64(11) |
| H(9C)  | 5922 | 6159 | 3498 | 59(11) |
| H(10A) | 3540 | 5532 | 3232 | 43     |

|        |      |       |      |        |
|--------|------|-------|------|--------|
| H(10B) | 3356 | 3778  | 3476 | 43     |
| H(11)  | 2541 | 4141  | 3959 | 45     |
| H(13)  | 3452 | 6977  | 4575 | 47     |
| H(14)  | 2744 | 8155  | 5114 | 48     |
| H(16)  | 238  | 6404  | 4745 | 52     |
| H(17)  | 946  | 5227  | 4207 | 52     |
| H(10C) | 3367 | 4310  | 3308 | 39     |
| H(10D) | 3592 | 3056  | 3658 | 39     |
| H(11B) | 3662 | 4534  | 4267 | 36     |
| H(13B) | 3734 | 6710  | 4817 | 43     |
| H(14B) | 2831 | 8047  | 5287 | 35     |
| H(16B) | 509  | 7167  | 4667 | 30     |
| H(17B) | 1411 | 5830  | 4197 | 35     |
| H(19)  | 4230 | 349   | 3361 | 40(8)  |
| H(20)  | 3160 | -1315 | 3015 | 39(8)  |
| H(21)  | 2736 | -421  | 2411 | 53(10) |
| H(22)  | 3373 | 2149  | 2152 | 56(10) |
| H(23)  | 4441 | 3819  | 2494 | 59(10) |

---

**Table 6. Torsion angles [°] for JF2892FMI.**

---

|                        |           |
|------------------------|-----------|
| C(9)-C(1)-O(1)-C(8)    | -98.7(3)  |
| C(10)-C(1)-O(1)-C(8)   | 141.3(3)  |
| C(10B)-C(1)-O(1)-C(8)  | 129.6(5)  |
| C(2)-C(1)-O(1)-C(8)    | 17.3(3)   |
| O(1)-C(1)-C(2)-C(3)    | -17.3(3)  |
| C(9)-C(1)-C(2)-C(3)    | 97.5(3)   |
| C(10)-C(1)-C(2)-C(3)   | -139.2(3) |
| C(10B)-C(1)-C(2)-C(3)  | -116.2(5) |
| O(1)-C(1)-C(2)-C(18)   | 105.4(3)  |
| C(9)-C(1)-C(2)-C(18)   | -139.8(3) |
| C(10)-C(1)-C(2)-C(18)  | -16.5(4)  |
| C(10B)-C(1)-C(2)-C(18) | 6.5(6)    |
| C(18)-C(2)-C(3)-C(8)   | -113.8(3) |

|                         |           |
|-------------------------|-----------|
| C(1)-C(2)-C(3)-C(8)     | 11.9(3)   |
| C(18)-C(2)-C(3)-C(4)    | 62.6(4)   |
| C(1)-C(2)-C(3)-C(4)     | -171.7(3) |
| C(8)-C(3)-C(4)-C(5)     | -0.5(4)   |
| C(2)-C(3)-C(4)-C(5)     | -176.6(3) |
| C(3)-C(4)-C(5)-C(6)     | 0.6(5)    |
| C(4)-C(5)-C(6)-C(7)     | -0.6(5)   |
| C(5)-C(6)-C(7)-C(8)     | 0.6(5)    |
| C(4)-C(3)-C(8)-O(1)     | -178.6(2) |
| C(2)-C(3)-C(8)-O(1)     | -1.7(3)   |
| C(4)-C(3)-C(8)-C(7)     | 0.5(4)    |
| C(2)-C(3)-C(8)-C(7)     | 177.4(3)  |
| C(1)-O(1)-C(8)-C(3)     | -10.3(3)  |
| C(1)-O(1)-C(8)-C(7)     | 170.5(3)  |
| C(6)-C(7)-C(8)-C(3)     | -0.5(4)   |
| C(6)-C(7)-C(8)-O(1)     | 178.5(3)  |
| O(1)-C(1)-C(10)-C(11)   | 58.6(4)   |
| C(9)-C(1)-C(10)-C(11)   | -59.8(4)  |
| C(2)-C(1)-C(10)-C(11)   | 177.3(3)  |
| C(1)-C(10)-C(11)-O(11)  | 66.8(5)   |
| C(1)-C(10)-C(11)-N(11)  | -116.9(4) |
| O(11)-C(11)-N(11)-C(12) | -5.6(7)   |
| C(10)-C(11)-N(11)-C(12) | 178.2(3)  |
| C(11)-N(11)-C(12)-C(13) | -48.3(5)  |
| C(11)-N(11)-C(12)-C(17) | 133.1(4)  |
| C(17)-C(12)-C(13)-C(14) | 0.0       |
| N(11)-C(12)-C(13)-C(14) | -178.6(3) |
| C(12)-C(13)-C(14)-C(15) | 0.0       |
| C(13)-C(14)-C(15)-C(16) | 0.0       |
| C(13)-C(14)-C(15)-I(15) | -172.9(3) |
| C(14)-C(15)-C(16)-C(17) | 0.0       |
| I(15)-C(15)-C(16)-C(17) | 172.7(3)  |
| C(15)-C(16)-C(17)-C(12) | 0.0       |
| C(13)-C(12)-C(17)-C(16) | 0.0       |
| N(11)-C(12)-C(17)-C(16) | 178.6(3)  |
| O(1)-C(1)-C(10B)-C(11B) | 80.7(9)   |

|                             |            |
|-----------------------------|------------|
| C(9)-C(1)-C(10B)-C(11B)     | -33.7(12)  |
| C(2)-C(1)-C(10B)-C(11B)     | -171.8(7)  |
| C(1)-C(10B)-C(11B)-O(11B)   | 94.8(15)   |
| C(1)-C(10B)-C(11B)-N(11B)   | -78.7(14)  |
| O(11B)-C(11B)-N(11B)-C(12B) | 18(2)      |
| C(10B)-C(11B)-N(11B)-C(12B) | -169.0(9)  |
| C(11B)-N(11B)-C(12B)-C(13B) | -137.6(10) |
| C(11B)-N(11B)-C(12B)-C(17B) | 44.8(13)   |
| C(17B)-C(12B)-C(13B)-C(14B) | 0.0        |
| N(11B)-C(12B)-C(13B)-C(14B) | -177.6(8)  |
| C(12B)-C(13B)-C(14B)-C(15B) | 0.0        |
| C(13B)-C(14B)-C(15B)-C(16B) | 0.0        |
| C(13B)-C(14B)-C(15B)-I(15B) | 165.6(7)   |
| C(14B)-C(15B)-C(16B)-C(17B) | 0.0        |
| I(15B)-C(15B)-C(16B)-C(17B) | -166.3(7)  |
| C(15B)-C(16B)-C(17B)-C(12B) | 0.0        |
| C(13B)-C(12B)-C(17B)-C(16B) | 0.0        |
| N(11B)-C(12B)-C(17B)-C(16B) | 177.6(8)   |
| C(3)-C(2)-C(18)-C(19)       | 39.2(4)    |
| C(1)-C(2)-C(18)-C(19)       | -77.2(4)   |
| C(3)-C(2)-C(18)-C(23)       | -140.7(3)  |
| C(1)-C(2)-C(18)-C(23)       | 102.8(3)   |
| C(23)-C(18)-C(19)-C(20)     | -0.2(4)    |
| C(2)-C(18)-C(19)-C(20)      | 179.8(3)   |
| C(18)-C(19)-C(20)-C(21)     | 0.2(4)     |
| C(19)-C(20)-C(21)-C(22)     | -0.2(4)    |
| C(20)-C(21)-C(22)-C(23)     | 0.2(5)     |
| C(21)-C(22)-C(23)-C(18)     | -0.2(5)    |
| C(19)-C(18)-C(23)-C(22)     | 0.3(5)     |
| C(2)-C(18)-C(23)-C(22)      | -179.8(3)  |

---

Symmetry transformations used to generate equivalent atoms:

**Table 7. Hydrogen bonds for JF2892FMI [Å and °].**

---

—

| D-H...A                      | d(D-H) | d(H...A) | d(D...A) | <(DHA) |
|------------------------------|--------|----------|----------|--------|
| <hr/>                        |        |          |          |        |
| —                            |        |          |          |        |
| C(9)-H(9A)...O(11)           | 0.98   | 2.29     | 2.906(4) | 120    |
| C(9)-H(9A)...I(15)#1         | 0.98   | 3.23     | 3.847(3) | 123    |
| C(9)-H(9A)...I(15B)#1        | 0.98   | 3.21     | 3.887(5) | 128    |
| N(11)-H(11)...O(11)#2        | 0.88   | 1.97     | 2.719(4) | 143    |
| C(17)-H(17)...O(11)#2        | 0.95   | 2.49     | 3.135(4) | 125    |
| N(11B)-H(11B)...O(1)         | 0.88   | 2.46     | 3.005(7) | 121    |
| C(13B)-H(13B)...I(15B)#10.95 |        | 3.07     | 3.962(7) | 156    |

—  
Symmetry transformations used to generate equivalent atoms:

#1  $x+1/2, -y+3/2, -z+1$  #2  $-x+1/2, y-1/2, z$

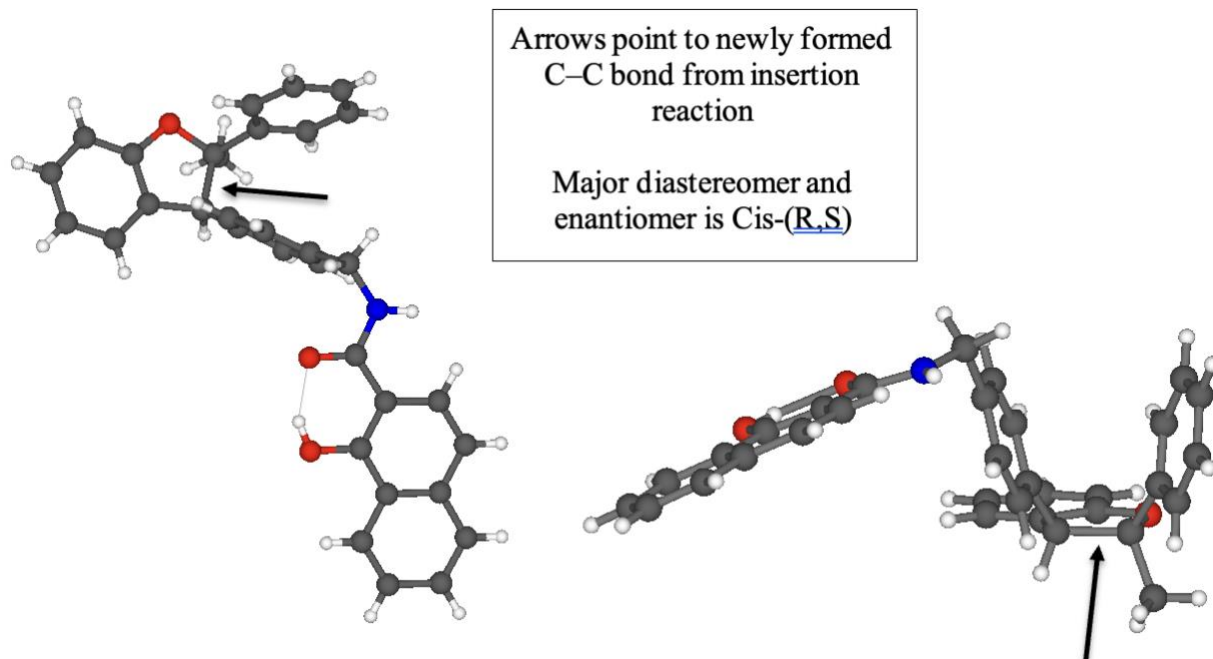

**Table 1. Crystal data and structure refinement for [C<sub>33</sub>H<sub>27</sub>NO<sub>3</sub>].**

|                                 |                                                  |                   |
|---------------------------------|--------------------------------------------------|-------------------|
| Identification code             | JF2920F (SND-II-110B)                            |                   |
| Empirical formula               | C <sub>33</sub> H <sub>27</sub> N O <sub>3</sub> |                   |
| Formula weight                  | 485.55                                           |                   |
| Temperature                     | 90(2) K                                          |                   |
| Wavelength                      | 1.54178 Å                                        |                   |
| Crystal system                  | Triclinic                                        |                   |
| Space group                     | P1                                               |                   |
| Unit cell dimensions            | a = 6.3151(4) Å                                  | α = 85.4422(16)°. |
|                                 | b = 11.1980(7) Å                                 | β = 85.4490(17)°. |
|                                 | c = 17.7567(10) Å                                | γ = 86.8128(17)°. |
| Volume                          | 1246.24(13) Å <sup>3</sup>                       |                   |
| Z                               | 2                                                |                   |
| Density (calculated)            | 1.294 Mg/m <sup>3</sup>                          |                   |
| Absorption coefficient          | 0.653 mm <sup>-1</sup>                           |                   |
| F(000)                          | 512                                              |                   |
| Crystal size                    | 0.491 x 0.283 x 0.110 mm <sup>3</sup>            |                   |
| Crystal color and habit         | Colorless Block                                  |                   |
| Diffractometer                  | Bruker APEX-II CCD                               |                   |
| Theta range for data collection | 2.503 to 69.434°.                                |                   |

|                                      |                                                                             |
|--------------------------------------|-----------------------------------------------------------------------------|
| Index ranges                         | -7<=h<=6, -13<=k<=13, -21<=l<=21                                            |
| Reflections collected                | 20993                                                                       |
| Independent reflections              | 8303 [R(int) = 0.0229]                                                      |
| Observed reflections (I > 2sigma(I)) | 8280                                                                        |
| Completeness to theta = 67.679°      | 95.6 %                                                                      |
| Absorption correction                | Semi-empirical from equivalents                                             |
| Max. and min. transmission           | 0.8692 and 0.7714                                                           |
| Solution method                      | SHELXT (Sheldrick, 2014)                                                    |
| Refinement method                    | SHELXL-2018/3 (Sheldrick, 2018) Full-matrix least-squares on F <sup>2</sup> |
| Data / restraints / parameters       | 8303 / 3 / 883                                                              |
| Goodness-of-fit on F <sup>2</sup>    | 1.013                                                                       |
| Final R indices [I>2sigma(I)]        | R1 = 0.0289, wR2 = 0.0778                                                   |
| R indices (all data)                 | R1 = 0.0290, wR2 = 0.0778                                                   |
| Absolute structure parameter         | 0.05(8)                                                                     |
| Largest diff. peak and hole          | 0.149 and -0.168 e.Å <sup>-3</sup>                                          |

**Table 2. Atomic coordinates ( x 10<sup>4</sup>) and equivalent isotropic displacement parameters (Å<sup>2</sup>x 10<sup>3</sup>) for JF2920F. U(eq) is defined as one third of the trace of the orthogonalized U<sup>ij</sup> tensor.**

|       | x        | y       | z       | U(eq) |
|-------|----------|---------|---------|-------|
| C(1)  | 9249(4)  | 2914(2) | 9207(1) | 28(1) |
| O(1)  | 11134(3) | 2411(1) | 9571(1) | 35(1) |
| C(2)  | 8885(4)  | 2048(2) | 8559(1) | 26(1) |
| C(3)  | 10528(4) | 1048(2) | 8716(1) | 27(1) |
| C(4)  | 11002(4) | -18(2)  | 8374(1) | 33(1) |
| C(5)  | 12670(4) | -776(2) | 8625(1) | 37(1) |
| C(6)  | 13829(4) | -479(2) | 9210(1) | 35(1) |
| C(7)  | 13367(4) | 584(2)  | 9557(1) | 33(1) |
| C(8)  | 11721(4) | 1328(2) | 9294(1) | 30(1) |
| C(9)  | 9747(4)  | 4175(2) | 8900(1) | 30(1) |
| C(10) | 11788(5) | 4427(2) | 8604(1) | 41(1) |

|       |          |         |         |       |
|-------|----------|---------|---------|-------|
| C(11) | 12211(7) | 5542(3) | 8245(2) | 62(1) |
| C(12) | 10633(7) | 6421(3) | 8175(2) | 69(1) |
| C(13) | 8599(7)  | 6204(3) | 8486(2) | 63(1) |
| C(14) | 8143(5)  | 5082(2) | 8847(1) | 41(1) |
| C(15) | 7408(4)  | 2861(2) | 9813(1) | 38(1) |
| C(16) | 9057(3)  | 2636(2) | 7759(1) | 25(1) |
| C(17) | 7281(4)  | 3251(2) | 7468(1) | 29(1) |
| C(18) | 7417(4)  | 3882(2) | 6761(1) | 30(1) |
| C(19) | 9333(3)  | 3910(2) | 6321(1) | 26(1) |
| C(20) | 11099(3) | 3271(2) | 6602(1) | 26(1) |
| C(21) | 10960(3) | 2649(2) | 7307(1) | 27(1) |
| C(22) | 9589(4)  | 4634(2) | 5566(1) | 28(1) |
| N(22) | 7764(3)  | 4643(2) | 5110(1) | 26(1) |
| C(23) | 7299(3)  | 3652(2) | 4797(1) | 22(1) |
| O(23) | 8430(2)  | 2704(1) | 4908(1) | 27(1) |
| C(24) | 5454(3)  | 3668(2) | 4335(1) | 23(1) |
| C(25) | 4915(3)  | 2589(2) | 4074(1) | 22(1) |
| O(25) | 6097(2)  | 1564(1) | 4209(1) | 27(1) |
| C(26) | 3082(3)  | 2541(2) | 3660(1) | 24(1) |
| C(27) | 2426(3)  | 1448(2) | 3422(1) | 27(1) |
| C(28) | 624(4)   | 1430(2) | 3044(1) | 30(1) |
| C(29) | -587(4)  | 2502(2) | 2872(1) | 30(1) |
| C(30) | 37(4)    | 3571(2) | 3085(1) | 29(1) |
| C(31) | 1863(3)  | 3620(2) | 3490(1) | 24(1) |
| C(32) | 2494(4)  | 4717(2) | 3734(1) | 27(1) |
| C(33) | 4210(3)  | 4734(2) | 4147(1) | 26(1) |
| C(41) | 7684(3)  | 7482(2) | 710(1)  | 25(1) |
| O(41) | 6018(2)  | 7058(1) | 277(1)  | 27(1) |
| C(42) | 7997(3)  | 6468(2) | 1380(1) | 25(1) |
| C(43) | 6206(3)  | 5671(2) | 1302(1) | 25(1) |
| C(44) | 5464(4)  | 4681(2) | 1749(1) | 29(1) |
| C(45) | 3831(4)  | 4054(2) | 1504(1) | 32(1) |
| C(46) | 2978(4)  | 4401(2) | 818(1)  | 32(1) |
| C(47) | 3673(4)  | 5402(2) | 373(1)  | 29(1) |
| C(48) | 5253(3)  | 6033(2) | 639(1)  | 25(1) |
| C(49) | 6903(3)  | 8675(2) | 1001(1) | 25(1) |



|       |          |          |         |       |
|-------|----------|----------|---------|-------|
| C(50) | 4786(4)  | 8865(2)  | 1261(1) | 30(1) |
| C(51) | 4097(4)  | 9901(2)  | 1604(1) | 36(1) |
| C(52) | 5519(5)  | 10769(2) | 1683(1) | 40(1) |
| C(53) | 7612(4)  | 10608(2) | 1407(1) | 38(1) |
| C(54) | 8309(4)  | 9567(2)  | 1072(1) | 32(1) |
| C(55) | 9642(4)  | 7565(2)  | 161(1)  | 32(1) |
| C(56) | 8128(3)  | 6931(2)  | 2156(1) | 23(1) |
| C(57) | 6341(3)  | 7065(2)  | 2657(1) | 25(1) |
| C(58) | 6468(3)  | 7541(2)  | 3349(1) | 26(1) |
| C(59) | 8392(3)  | 7897(2)  | 3564(1) | 24(1) |
| C(60) | 10192(3) | 7763(2)  | 3063(1) | 26(1) |
| C(61) | 10061(3) | 7275(2)  | 2374(1) | 26(1) |
| C(62) | 8598(4)  | 8366(2)  | 4332(1) | 28(1) |
| N(62) | 6601(3)  | 8842(2)  | 4689(1) | 26(1) |
| C(63) | 5270(3)  | 8152(2)  | 5133(1) | 25(1) |
| O(63) | 5682(3)  | 7040(1)  | 5236(1) | 29(1) |
| C(64) | 3315(3)  | 8724(2)  | 5486(1) | 24(1) |
| C(65) | 1884(3)  | 8018(2)  | 5933(1) | 25(1) |
| O(65) | 2253(3)  | 6827(1)  | 6082(1) | 32(1) |
| C(66) | -59(4)   | 8530(2)  | 6261(1) | 27(1) |
| C(67) | -1594(4) | 7820(2)  | 6681(1) | 33(1) |
| C(68) | -3440(4) | 8348(2)  | 6983(1) | 38(1) |
| C(69) | -3835(4) | 9599(2)  | 6889(1) | 37(1) |
| C(70) | -2393(4) | 10305(2) | 6480(1) | 33(1) |
| C(71) | -475(4)  | 9794(2)  | 6146(1) | 28(1) |
| C(72) | 1021(4)  | 10503(2) | 5702(1) | 29(1) |
| C(73) | 2827(4)  | 9984(2)  | 5380(1) | 26(1) |

**Table 3. Bond lengths [Å] and angles [°] for JF2920F.**

---

|            |          |
|------------|----------|
| C(1)-O(1)  | 1.464(3) |
| C(1)-C(9)  | 1.513(3) |
| C(1)-C(15) | 1.521(3) |
| C(1)-C(2)  | 1.600(3) |
| O(1)-C(8)  | 1.366(3) |

|              |          |
|--------------|----------|
| C(2)-C(3)    | 1.508(3) |
| C(2)-C(16)   | 1.516(3) |
| C(2)-H(2)    | 1.00(3)  |
| C(3)-C(8)    | 1.384(3) |
| C(3)-C(4)    | 1.390(3) |
| C(4)-C(5)    | 1.393(3) |
| C(4)-H(4)    | 1.02(3)  |
| C(5)-C(6)    | 1.389(4) |
| C(5)-H(5)    | 0.97(4)  |
| C(6)-C(7)    | 1.390(3) |
| C(6)-H(6)    | 1.00(3)  |
| C(7)-C(8)    | 1.383(3) |
| C(7)-H(7)    | 0.99(3)  |
| C(9)-C(10)   | 1.388(4) |
| C(9)-C(14)   | 1.397(3) |
| C(10)-C(11)  | 1.385(4) |
| C(10)-H(10)  | 1.00(4)  |
| C(11)-C(12)  | 1.367(6) |
| C(11)-H(11)  | 1.04(5)  |
| C(12)-C(13)  | 1.384(6) |
| C(12)-H(12)  | 0.98(4)  |
| C(13)-C(14)  | 1.398(4) |
| C(13)-H(13)  | 1.01(4)  |
| C(14)-H(14)  | 0.98(3)  |
| C(15)-H(15A) | 0.99(3)  |
| C(15)-H(15B) | 1.02(4)  |
| C(15)-H(15C) | 1.00(3)  |
| C(16)-C(21)  | 1.391(3) |
| C(16)-C(17)  | 1.396(3) |
| C(17)-C(18)  | 1.389(3) |
| C(17)-H(17)  | 1.03(3)  |
| C(18)-C(19)  | 1.389(3) |
| C(18)-H(18)  | 1.02(3)  |
| C(19)-C(20)  | 1.395(3) |
| C(19)-C(22)  | 1.512(3) |
| C(20)-C(21)  | 1.383(3) |

|              |          |
|--------------|----------|
| C(20)-H(20)  | 0.97(3)  |
| C(21)-H(21)  | 0.95(3)  |
| C(22)-N(22)  | 1.459(3) |
| C(22)-H(22A) | 1.02(3)  |
| C(22)-H(22B) | 0.99(3)  |
| N(22)-C(23)  | 1.338(3) |
| N(22)-H(22)  | 0.90(3)  |
| C(23)-O(23)  | 1.257(2) |
| C(23)-C(24)  | 1.475(3) |
| C(24)-C(25)  | 1.396(3) |
| C(24)-C(33)  | 1.425(3) |
| C(25)-O(25)  | 1.351(2) |
| C(25)-C(26)  | 1.425(3) |
| O(25)-H(25A) | 0.97(4)  |
| C(26)-C(27)  | 1.419(3) |
| C(26)-C(31)  | 1.421(3) |
| C(27)-C(28)  | 1.367(3) |
| C(27)-H(27)  | 0.95(3)  |
| C(28)-C(29)  | 1.412(3) |
| C(28)-H(28)  | 0.95(3)  |
| C(29)-C(30)  | 1.371(3) |
| C(29)-H(29)  | 0.97(3)  |
| C(30)-C(31)  | 1.413(3) |
| C(30)-H(30)  | 1.01(3)  |
| C(31)-C(32)  | 1.422(3) |
| C(32)-C(33)  | 1.358(3) |
| C(32)-H(32)  | 0.97(3)  |
| C(33)-H(33)  | 0.96(3)  |
| C(41)-O(41)  | 1.471(2) |
| C(41)-C(49)  | 1.513(3) |
| C(41)-C(55)  | 1.515(3) |
| C(41)-C(42)  | 1.595(3) |
| O(41)-C(48)  | 1.363(3) |
| C(42)-C(43)  | 1.501(3) |
| C(42)-C(56)  | 1.519(3) |
| C(42)-H(42)  | 1.03(3)  |

|              |          |
|--------------|----------|
| C(43)-C(48)  | 1.386(3) |
| C(43)-C(44)  | 1.392(3) |
| C(44)-C(45)  | 1.394(3) |
| C(44)-H(44)  | 1.01(3)  |
| C(45)-C(46)  | 1.390(3) |
| C(45)-H(45)  | 0.95(3)  |
| C(46)-C(47)  | 1.390(3) |
| C(46)-H(46)  | 1.02(3)  |
| C(47)-C(48)  | 1.388(3) |
| C(47)-H(47)  | 0.97(3)  |
| C(49)-C(50)  | 1.390(3) |
| C(49)-C(54)  | 1.393(3) |
| C(50)-C(51)  | 1.386(3) |
| C(50)-H(50)  | 0.98(3)  |
| C(51)-C(52)  | 1.382(4) |
| C(51)-H(51)  | 0.96(3)  |
| C(52)-C(53)  | 1.381(4) |
| C(52)-H(52)  | 0.96(4)  |
| C(53)-C(54)  | 1.384(3) |
| C(53)-H(53)  | 1.03(3)  |
| C(54)-H(54)  | 1.02(3)  |
| C(55)-H(55A) | 0.96(3)  |
| C(55)-H(55B) | 1.03(3)  |
| C(55)-H(55C) | 0.99(3)  |
| C(56)-C(57)  | 1.390(3) |
| C(56)-C(61)  | 1.393(3) |
| C(57)-C(58)  | 1.388(3) |
| C(57)-H(57)  | 0.98(3)  |
| C(58)-C(59)  | 1.390(3) |
| C(58)-H(58)  | 0.97(3)  |
| C(59)-C(60)  | 1.396(3) |
| C(59)-C(62)  | 1.517(3) |
| C(60)-C(61)  | 1.390(3) |
| C(60)-H(60)  | 0.99(3)  |
| C(61)-H(61)  | 0.99(3)  |
| C(62)-N(62)  | 1.459(3) |

|              |          |
|--------------|----------|
| C(62)-H(62A) | 0.91(3)  |
| C(62)-H(62B) | 1.00(3)  |
| N(62)-C(63)  | 1.341(3) |
| N(62)-H(62)  | 0.88(3)  |
| C(63)-O(63)  | 1.260(2) |
| C(63)-C(64)  | 1.476(3) |
| C(64)-C(65)  | 1.391(3) |
| C(64)-C(73)  | 1.428(3) |
| C(65)-O(65)  | 1.350(2) |
| C(65)-C(66)  | 1.427(3) |
| O(65)-H(65A) | 0.93(3)  |
| C(66)-C(67)  | 1.416(3) |
| C(66)-C(71)  | 1.426(3) |
| C(67)-C(68)  | 1.368(4) |
| C(67)-H(67)  | 0.99(3)  |
| C(68)-C(69)  | 1.408(4) |
| C(68)-H(68)  | 0.95(3)  |
| C(69)-C(70)  | 1.366(4) |
| C(69)-H(69)  | 1.00(3)  |
| C(70)-C(71)  | 1.417(3) |
| C(70)-H(70)  | 0.99(3)  |
| C(71)-C(72)  | 1.419(3) |
| C(72)-C(73)  | 1.356(3) |
| C(72)-H(72)  | 0.97(3)  |
| C(73)-H(73)  | 0.98(3)  |

|                 |            |
|-----------------|------------|
| O(1)-C(1)-C(9)  | 106.48(17) |
| O(1)-C(1)-C(15) | 106.49(18) |
| C(9)-C(1)-C(15) | 113.79(19) |
| O(1)-C(1)-C(2)  | 106.00(16) |
| C(9)-C(1)-C(2)  | 113.26(16) |
| C(15)-C(1)-C(2) | 110.21(18) |
| C(8)-O(1)-C(1)  | 108.90(16) |
| C(3)-C(2)-C(16) | 114.95(17) |
| C(3)-C(2)-C(1)  | 101.12(16) |
| C(16)-C(2)-C(1) | 114.90(16) |

|                   |            |
|-------------------|------------|
| C(3)-C(2)-H(2)    | 110.9(15)  |
| C(16)-C(2)-H(2)   | 108.5(15)  |
| C(1)-C(2)-H(2)    | 106.1(15)  |
| C(8)-C(3)-C(4)    | 119.3(2)   |
| C(8)-C(3)-C(2)    | 109.76(18) |
| C(4)-C(3)-C(2)    | 131.0(2)   |
| C(3)-C(4)-C(5)    | 118.8(2)   |
| C(3)-C(4)-H(4)    | 120.2(16)  |
| C(5)-C(4)-H(4)    | 120.9(16)  |
| C(6)-C(5)-C(4)    | 120.8(2)   |
| C(6)-C(5)-H(5)    | 118(2)     |
| C(4)-C(5)-H(5)    | 121(2)     |
| C(5)-C(6)-C(7)    | 120.9(2)   |
| C(5)-C(6)-H(6)    | 119.1(17)  |
| C(7)-C(6)-H(6)    | 119.9(17)  |
| C(8)-C(7)-C(6)    | 117.3(2)   |
| C(8)-C(7)-H(7)    | 121.7(18)  |
| C(6)-C(7)-H(7)    | 120.9(18)  |
| O(1)-C(8)-C(7)    | 123.4(2)   |
| O(1)-C(8)-C(3)    | 113.66(19) |
| C(7)-C(8)-C(3)    | 122.9(2)   |
| C(10)-C(9)-C(14)  | 118.5(2)   |
| C(10)-C(9)-C(1)   | 120.2(2)   |
| C(14)-C(9)-C(1)   | 121.1(2)   |
| C(11)-C(10)-C(9)  | 120.7(3)   |
| C(11)-C(10)-H(10) | 123(2)     |
| C(9)-C(10)-H(10)  | 116(2)     |
| C(12)-C(11)-C(10) | 120.9(3)   |
| C(12)-C(11)-H(11) | 121(3)     |
| C(10)-C(11)-H(11) | 118(3)     |
| C(11)-C(12)-C(13) | 119.4(3)   |
| C(11)-C(12)-H(12) | 122(2)     |
| C(13)-C(12)-H(12) | 118(2)     |
| C(12)-C(13)-C(14) | 120.4(3)   |
| C(12)-C(13)-H(13) | 124(2)     |
| C(14)-C(13)-H(13) | 116(2)     |

|                     |            |
|---------------------|------------|
| C(9)-C(14)-C(13)    | 120.0(3)   |
| C(9)-C(14)-H(14)    | 117.5(17)  |
| C(13)-C(14)-H(14)   | 122.4(17)  |
| C(1)-C(15)-H(15A)   | 108.4(19)  |
| C(1)-C(15)-H(15B)   | 108.7(19)  |
| H(15A)-C(15)-H(15B) | 110(3)     |
| C(1)-C(15)-H(15C)   | 111.2(19)  |
| H(15A)-C(15)-H(15C) | 107(3)     |
| H(15B)-C(15)-H(15C) | 111(3)     |
| C(21)-C(16)-C(17)   | 117.61(19) |
| C(21)-C(16)-C(2)    | 122.64(19) |
| C(17)-C(16)-C(2)    | 119.66(18) |
| C(18)-C(17)-C(16)   | 121.3(2)   |
| C(18)-C(17)-H(17)   | 119.4(16)  |
| C(16)-C(17)-H(17)   | 119.3(16)  |
| C(17)-C(18)-C(19)   | 120.6(2)   |
| C(17)-C(18)-H(18)   | 121.8(16)  |
| C(19)-C(18)-H(18)   | 117.5(16)  |
| C(18)-C(19)-C(20)   | 118.16(18) |
| C(18)-C(19)-C(22)   | 122.63(19) |
| C(20)-C(19)-C(22)   | 119.18(19) |
| C(21)-C(20)-C(19)   | 121.03(19) |
| C(21)-C(20)-H(20)   | 121.5(17)  |
| C(19)-C(20)-H(20)   | 117.4(17)  |
| C(20)-C(21)-C(16)   | 121.2(2)   |
| C(20)-C(21)-H(21)   | 121.0(16)  |
| C(16)-C(21)-H(21)   | 117.8(16)  |
| N(22)-C(22)-C(19)   | 114.48(18) |
| N(22)-C(22)-H(22A)  | 107.4(16)  |
| C(19)-C(22)-H(22A)  | 109.7(16)  |
| N(22)-C(22)-H(22B)  | 109.6(15)  |
| C(19)-C(22)-H(22B)  | 107.5(14)  |
| H(22A)-C(22)-H(22B) | 108(2)     |
| C(23)-N(22)-C(22)   | 120.43(17) |
| C(23)-N(22)-H(22)   | 121.8(19)  |
| C(22)-N(22)-H(22)   | 117.6(19)  |

|                    |            |
|--------------------|------------|
| O(23)-C(23)-N(22)  | 119.40(19) |
| O(23)-C(23)-C(24)  | 120.42(17) |
| N(22)-C(23)-C(24)  | 120.17(17) |
| C(25)-C(24)-C(33)  | 118.97(18) |
| C(25)-C(24)-C(23)  | 118.30(17) |
| C(33)-C(24)-C(23)  | 122.72(17) |
| O(25)-C(25)-C(24)  | 121.24(18) |
| O(25)-C(25)-C(26)  | 118.08(16) |
| C(24)-C(25)-C(26)  | 120.68(17) |
| C(25)-O(25)-H(25A) | 103.4(19)  |
| C(27)-C(26)-C(31)  | 119.2(2)   |
| C(27)-C(26)-C(25)  | 122.07(18) |
| C(31)-C(26)-C(25)  | 118.76(17) |
| C(28)-C(27)-C(26)  | 120.5(2)   |
| C(28)-C(27)-H(27)  | 122.9(19)  |
| C(26)-C(27)-H(27)  | 116.6(19)  |
| C(27)-C(28)-C(29)  | 120.5(2)   |
| C(27)-C(28)-H(28)  | 119.6(18)  |
| C(29)-C(28)-H(28)  | 119.9(18)  |
| C(30)-C(29)-C(28)  | 120.1(2)   |
| C(30)-C(29)-H(29)  | 118.6(14)  |
| C(28)-C(29)-H(29)  | 121.3(14)  |
| C(29)-C(30)-C(31)  | 120.9(2)   |
| C(29)-C(30)-H(30)  | 117.9(15)  |
| C(31)-C(30)-H(30)  | 121.2(15)  |
| C(30)-C(31)-C(26)  | 118.82(18) |
| C(30)-C(31)-C(32)  | 121.56(19) |
| C(26)-C(31)-C(32)  | 119.62(19) |
| C(33)-C(32)-C(31)  | 120.46(19) |
| C(33)-C(32)-H(32)  | 119.3(17)  |
| C(31)-C(32)-H(32)  | 120.2(17)  |
| C(32)-C(33)-C(24)  | 121.40(18) |
| C(32)-C(33)-H(33)  | 120.9(17)  |
| C(24)-C(33)-H(33)  | 117.7(17)  |
| O(41)-C(41)-C(49)  | 108.11(16) |
| O(41)-C(41)-C(55)  | 105.57(16) |



|                   |            |
|-------------------|------------|
| C(49)-C(41)-C(55) | 113.42(18) |
| O(41)-C(41)-C(42) | 105.04(15) |
| C(49)-C(41)-C(42) | 112.19(15) |
| C(55)-C(41)-C(42) | 111.86(17) |
| C(48)-O(41)-C(41) | 109.26(15) |
| C(43)-C(42)-C(56) | 116.36(16) |
| C(43)-C(42)-C(41) | 102.16(16) |
| C(56)-C(42)-C(41) | 114.95(15) |
| C(43)-C(42)-H(42) | 109.7(14)  |
| C(56)-C(42)-H(42) | 108.4(14)  |
| C(41)-C(42)-H(42) | 104.6(14)  |
| C(48)-C(43)-C(44) | 119.2(2)   |
| C(48)-C(43)-C(42) | 109.03(18) |
| C(44)-C(43)-C(42) | 131.78(19) |
| C(43)-C(44)-C(45) | 119.1(2)   |
| C(43)-C(44)-H(44) | 119.7(15)  |
| C(45)-C(44)-H(44) | 121.2(15)  |
| C(46)-C(45)-C(44) | 120.5(2)   |
| C(46)-C(45)-H(45) | 120.7(17)  |
| C(44)-C(45)-H(45) | 118.7(17)  |
| C(45)-C(46)-C(47) | 121.0(2)   |
| C(45)-C(46)-H(46) | 120.2(17)  |
| C(47)-C(46)-H(46) | 118.8(17)  |
| C(48)-C(47)-C(46) | 117.4(2)   |
| C(48)-C(47)-H(47) | 121.2(17)  |
| C(46)-C(47)-H(47) | 121.4(17)  |
| O(41)-C(48)-C(43) | 113.76(18) |
| O(41)-C(48)-C(47) | 123.56(18) |
| C(43)-C(48)-C(47) | 122.7(2)   |
| C(50)-C(49)-C(54) | 118.43(19) |
| C(50)-C(49)-C(41) | 120.34(18) |
| C(54)-C(49)-C(41) | 121.03(19) |
| C(51)-C(50)-C(49) | 121.0(2)   |
| C(51)-C(50)-H(50) | 118.9(15)  |
| C(49)-C(50)-H(50) | 120.1(15)  |
| C(52)-C(51)-C(50) | 120.0(2)   |

|                     |            |
|---------------------|------------|
| C(52)-C(51)-H(51)   | 122.6(17)  |
| C(50)-C(51)-H(51)   | 117.4(17)  |
| C(53)-C(52)-C(51)   | 119.6(2)   |
| C(53)-C(52)-H(52)   | 119(2)     |
| C(51)-C(52)-H(52)   | 122(2)     |
| C(52)-C(53)-C(54)   | 120.5(2)   |
| C(52)-C(53)-H(53)   | 120.8(18)  |
| C(54)-C(53)-H(53)   | 118.6(19)  |
| C(53)-C(54)-C(49)   | 120.5(2)   |
| C(53)-C(54)-H(54)   | 120.6(16)  |
| C(49)-C(54)-H(54)   | 118.8(16)  |
| C(41)-C(55)-H(55A)  | 105.0(16)  |
| C(41)-C(55)-H(55B)  | 110.0(18)  |
| H(55A)-C(55)-H(55B) | 107(2)     |
| C(41)-C(55)-H(55C)  | 109.3(16)  |
| H(55A)-C(55)-H(55C) | 115(2)     |
| H(55B)-C(55)-H(55C) | 110(2)     |
| C(57)-C(56)-C(61)   | 117.88(18) |
| C(57)-C(56)-C(42)   | 121.88(18) |
| C(61)-C(56)-C(42)   | 120.20(18) |
| C(58)-C(57)-C(56)   | 121.20(19) |
| C(58)-C(57)-H(57)   | 120.3(17)  |
| C(56)-C(57)-H(57)   | 118.5(17)  |
| C(57)-C(58)-C(59)   | 120.99(19) |
| C(57)-C(58)-H(58)   | 120.3(17)  |
| C(59)-C(58)-H(58)   | 118.6(16)  |
| C(58)-C(59)-C(60)   | 118.04(18) |
| C(58)-C(59)-C(62)   | 122.12(19) |
| C(60)-C(59)-C(62)   | 119.78(18) |
| C(61)-C(60)-C(59)   | 120.77(19) |
| C(61)-C(60)-H(60)   | 121.0(16)  |
| C(59)-C(60)-H(60)   | 118.3(16)  |
| C(60)-C(61)-C(56)   | 121.10(19) |
| C(60)-C(61)-H(61)   | 120.6(17)  |
| C(56)-C(61)-H(61)   | 118.3(17)  |
| N(62)-C(62)-C(59)   | 114.03(17) |

|                     |            |
|---------------------|------------|
| N(62)-C(62)-H(62A)  | 106.5(15)  |
| C(59)-C(62)-H(62A)  | 110.0(15)  |
| N(62)-C(62)-H(62B)  | 107.2(15)  |
| C(59)-C(62)-H(62B)  | 110.5(15)  |
| H(62A)-C(62)-H(62B) | 108(2)     |
| C(63)-N(62)-C(62)   | 122.49(17) |
| C(63)-N(62)-H(62)   | 117.5(17)  |
| C(62)-N(62)-H(62)   | 119.8(17)  |
| O(63)-C(63)-N(62)   | 120.22(19) |
| O(63)-C(63)-C(64)   | 121.32(18) |
| N(62)-C(63)-C(64)   | 118.45(17) |
| C(65)-C(64)-C(73)   | 118.49(19) |
| C(65)-C(64)-C(63)   | 119.36(17) |
| C(73)-C(64)-C(63)   | 122.15(18) |
| O(65)-C(65)-C(64)   | 122.35(19) |
| O(65)-C(65)-C(66)   | 116.63(18) |
| C(64)-C(65)-C(66)   | 121.02(18) |
| C(65)-O(65)-H(65A)  | 101.8(19)  |
| C(67)-C(66)-C(71)   | 119.3(2)   |
| C(67)-C(66)-C(65)   | 122.0(2)   |
| C(71)-C(66)-C(65)   | 118.65(19) |
| C(68)-C(67)-C(66)   | 120.1(2)   |
| C(68)-C(67)-H(67)   | 121.5(17)  |
| C(66)-C(67)-H(67)   | 118.4(17)  |
| C(67)-C(68)-C(69)   | 120.8(2)   |
| C(67)-C(68)-H(68)   | 119.3(19)  |
| C(69)-C(68)-H(68)   | 119.8(19)  |
| C(70)-C(69)-C(68)   | 120.4(2)   |
| C(70)-C(69)-H(69)   | 124.5(18)  |
| C(68)-C(69)-H(69)   | 115.0(18)  |
| C(69)-C(70)-C(71)   | 120.7(2)   |
| C(69)-C(70)-H(70)   | 120.4(16)  |
| C(71)-C(70)-H(70)   | 118.9(16)  |
| C(70)-C(71)-C(72)   | 121.8(2)   |
| C(70)-C(71)-C(66)   | 118.7(2)   |
| C(72)-C(71)-C(66)   | 119.5(2)   |

|                   |            |
|-------------------|------------|
| C(73)-C(72)-C(71) | 120.39(19) |
| C(73)-C(72)-H(72) | 124.1(18)  |
| C(71)-C(72)-H(72) | 115.6(18)  |
| C(72)-C(73)-C(64) | 121.9(2)   |
| C(72)-C(73)-H(73) | 120.2(15)  |
| C(64)-C(73)-H(73) | 117.9(15)  |

---

Symmetry transformations used to generate equivalent atoms:

**Table 4. Anisotropic displacement parameters ( $\text{\AA}^2 \times 10^3$ ) for JF2920F. The anisotropic displacement factor exponent takes the form:  $-2 \square^2 [ h^2 a^* 2U^{11} + \dots + 2 h k a^* b^* U^{12} ]$**

---

|       | U11    | U22   | U33   | U23   | U13    | U12    |
|-------|--------|-------|-------|-------|--------|--------|
| C(1)  | 30(1)  | 31(1) | 22(1) | -2(1) | -4(1)  | -1(1)  |
| O(1)  | 41(1)  | 30(1) | 37(1) | -8(1) | -16(1) | 4(1)   |
| C(2)  | 27(1)  | 28(1) | 25(1) | -3(1) | -1(1)  | -6(1)  |
| C(3)  | 30(1)  | 26(1) | 24(1) | 2(1)  | 1(1)   | -6(1)  |
| C(4)  | 42(1)  | 28(1) | 29(1) | -1(1) | -2(1)  | -6(1)  |
| C(5)  | 50(2)  | 25(1) | 34(1) | 1(1)  | 4(1)   | -1(1)  |
| C(6)  | 35(1)  | 30(1) | 38(1) | 7(1)  | 2(1)   | -1(1)  |
| C(7)  | 34(1)  | 30(1) | 35(1) | 6(1)  | -6(1)  | -7(1)  |
| C(8)  | 33(1)  | 27(1) | 28(1) | 0(1)  | -2(1)  | -5(1)  |
| C(9)  | 43(1)  | 31(1) | 18(1) | -7(1) | -5(1)  | -4(1)  |
| C(10) | 48(2)  | 51(2) | 28(1) | -5(1) | -5(1)  | -21(1) |
| C(11) | 87(3)  | 72(2) | 33(1) | 9(1)  | -18(1) | -52(2) |
| C(12) | 118(3) | 50(2) | 47(2) | 17(1) | -44(2) | -46(2) |
| C(13) | 113(3) | 33(1) | 49(2) | -6(1) | -39(2) | 4(2)   |
| C(14) | 61(2)  | 34(1) | 31(1) | -8(1) | -12(1) | 4(1)   |
| C(15) | 43(2)  | 45(1) | 26(1) | -4(1) | 5(1)   | -7(1)  |
| C(16) | 28(1)  | 26(1) | 23(1) | -7(1) | -3(1)  | -4(1)  |
| C(17) | 27(1)  | 36(1) | 25(1) | -8(1) | -2(1)  | -1(1)  |
| C(18) | 32(1)  | 31(1) | 28(1) | -6(1) | -7(1)  | 3(1)   |

|       |       |       |       |        |        |       |
|-------|-------|-------|-------|--------|--------|-------|
| C(19) | 33(1) | 22(1) | 23(1) | -6(1)  | -6(1)  | -3(1) |
| C(20) | 25(1) | 28(1) | 25(1) | -4(1)  | -1(1)  | -3(1) |
| C(21) | 25(1) | 29(1) | 26(1) | -4(1)  | -4(1)  | -2(1) |
| C(22) | 32(1) | 27(1) | 26(1) | -3(1)  | -7(1)  | -5(1) |
| N(22) | 32(1) | 21(1) | 24(1) | -1(1)  | -8(1)  | 0(1)  |
| C(23) | 28(1) | 20(1) | 19(1) | 0(1)   | 0(1)   | -1(1) |
| O(23) | 30(1) | 22(1) | 29(1) | -1(1)  | -6(1)  | 2(1)  |
| C(24) | 27(1) | 22(1) | 20(1) | 0(1)   | 0(1)   | -2(1) |
| C(25) | 25(1) | 21(1) | 20(1) | 0(1)   | 2(1)   | -1(1) |
| O(25) | 29(1) | 19(1) | 32(1) | -2(1)  | -5(1)  | 1(1)  |
| C(26) | 25(1) | 25(1) | 21(1) | -2(1)  | 3(1)   | -2(1) |
| C(27) | 26(1) | 26(1) | 29(1) | -4(1)  | 0(1)   | -2(1) |
| C(28) | 32(1) | 31(1) | 29(1) | -7(1)  | -1(1)  | -8(1) |
| C(29) | 24(1) | 39(1) | 27(1) | -5(1)  | -2(1)  | -4(1) |
| C(30) | 30(1) | 31(1) | 25(1) | 0(1)   | -1(1)  | 1(1)  |
| C(31) | 25(1) | 27(1) | 19(1) | -1(1)  | 2(1)   | -2(1) |
| C(32) | 32(1) | 24(1) | 26(1) | 1(1)   | -3(1)  | 4(1)  |
| C(33) | 32(1) | 19(1) | 25(1) | -1(1)  | -3(1)  | -1(1) |
| C(41) | 25(1) | 30(1) | 21(1) | -2(1)  | -4(1)  | 0(1)  |
| O(41) | 29(1) | 29(1) | 25(1) | -3(1)  | -8(1)  | 0(1)  |
| C(42) | 24(1) | 26(1) | 24(1) | -2(1)  | -2(1)  | 3(1)  |
| C(43) | 26(1) | 24(1) | 25(1) | -8(1)  | -2(1)  | 3(1)  |
| C(44) | 33(1) | 26(1) | 28(1) | -5(1)  | -2(1)  | 2(1)  |
| C(45) | 35(1) | 26(1) | 36(1) | -8(1)  | 2(1)   | -1(1) |
| C(46) | 27(1) | 32(1) | 39(1) | -16(1) | -1(1)  | 1(1)  |
| C(47) | 27(1) | 30(1) | 30(1) | -12(1) | -4(1)  | 5(1)  |
| C(48) | 24(1) | 26(1) | 26(1) | -8(1)  | 0(1)   | 5(1)  |
| C(49) | 29(1) | 26(1) | 20(1) | 1(1)   | -4(1)  | 1(1)  |
| C(50) | 30(1) | 30(1) | 29(1) | -2(1)  | -3(1)  | 3(1)  |
| C(51) | 40(2) | 36(1) | 31(1) | -4(1)  | -3(1)  | 11(1) |
| C(52) | 57(2) | 29(1) | 36(1) | -7(1)  | -12(1) | 10(1) |
| C(53) | 51(2) | 29(1) | 37(1) | -1(1)  | -14(1) | -6(1) |
| C(54) | 34(1) | 31(1) | 29(1) | 2(1)   | -7(1)  | -2(1) |
| C(55) | 30(1) | 42(1) | 25(1) | -1(1)  | 1(1)   | 2(1)  |
| C(56) | 24(1) | 21(1) | 24(1) | 0(1)   | -5(1)  | 2(1)  |
| C(57) | 23(1) | 28(1) | 25(1) | -2(1)  | -5(1)  | -2(1) |

|       |       |       |       |       |        |       |
|-------|-------|-------|-------|-------|--------|-------|
| C(58) | 24(1) | 29(1) | 27(1) | -3(1) | -4(1)  | -1(1) |
| C(59) | 27(1) | 21(1) | 26(1) | 0(1)  | -7(1)  | 0(1)  |
| C(60) | 24(1) | 25(1) | 30(1) | -1(1) | -7(1)  | -3(1) |
| C(61) | 24(1) | 26(1) | 26(1) | 1(1)  | -1(1)  | -1(1) |
| C(62) | 28(1) | 27(1) | 29(1) | -4(1) | -7(1)  | 0(1)  |
| N(62) | 30(1) | 21(1) | 28(1) | -4(1) | -5(1)  | 0(1)  |
| C(63) | 31(1) | 21(1) | 23(1) | -5(1) | -10(1) | 0(1)  |
| O(63) | 37(1) | 21(1) | 30(1) | -3(1) | -6(1)  | 2(1)  |
| C(64) | 29(1) | 22(1) | 24(1) | -4(1) | -8(1)  | -1(1) |
| C(65) | 31(1) | 23(1) | 23(1) | -4(1) | -9(1)  | -2(1) |
| O(65) | 39(1) | 21(1) | 35(1) | -1(1) | -3(1)  | -2(1) |
| C(66) | 31(1) | 31(1) | 21(1) | -4(1) | -10(1) | -2(1) |
| C(67) | 35(1) | 36(1) | 28(1) | -2(1) | -6(1)  | -5(1) |
| C(68) | 34(1) | 48(1) | 31(1) | -4(1) | -2(1)  | -6(1) |
| C(69) | 33(1) | 49(1) | 31(1) | -6(1) | -6(1)  | 5(1)  |
| C(70) | 36(1) | 37(1) | 28(1) | -9(1) | -10(1) | 6(1)  |
| C(71) | 34(1) | 30(1) | 22(1) | -6(1) | -11(1) | 2(1)  |
| C(72) | 37(1) | 23(1) | 29(1) | -2(1) | -10(1) | 4(1)  |
| C(73) | 32(1) | 22(1) | 26(1) | -2(1) | -6(1)  | -1(1) |

**Table 5. Hydrogen coordinates (  $\times 10^4$ ) and isotropic displacement parameters ( $\text{\AA}^2 \times 10^3$ ) for JF2920F.**

|      | x         | y         | z        | U(eq) |
|------|-----------|-----------|----------|-------|
| H(2) | 7420(40)  | 1760(20)  | 8672(14) | 25(6) |
| H(4) | 10160(40) | -230(20)  | 7939(16) | 31(6) |
| H(5) | 13050(50) | -1520(30) | 8390(20) | 52(9) |
| H(6) | 14970(50) | -1060(30) | 9396(16) | 36(7) |
| H(7) | 14240(50) | 820(30)   | 9955(18) | 45(8) |

|        |           |           |           |        |
|--------|-----------|-----------|-----------|--------|
| H(10)  | 12890(60) | 3770(30)  | 8670(20)  | 51(9)  |
| H(11)  | 13750(80) | 5690(50)  | 8020(30)  | 93(15) |
| H(12)  | 10890(70) | 7220(40)  | 7920(20)  | 71(11) |
| H(13)  | 7350(70)  | 6800(40)  | 8450(20)  | 69(11) |
| H(14)  | 6710(50)  | 4890(30)  | 9062(17)  | 37(7)  |
| H(15A) | 7310(50)  | 2020(30)  | 10030(19) | 45(8)  |
| H(15B) | 6040(60)  | 3140(30)  | 9570(20)  | 50(9)  |
| H(15C) | 7650(50)  | 3360(30)  | 10240(20) | 47(8)  |
| H(17)  | 5860(50)  | 3260(20)  | 7790(16)  | 34(7)  |
| H(18)  | 6160(50)  | 4380(30)  | 6563(16)  | 35(7)  |
| H(20)  | 12400(50) | 3250(20)  | 6274(16)  | 34(7)  |
| H(21)  | 12150(40) | 2190(20)  | 7491(15)  | 27(6)  |
| H(22A) | 9840(50)  | 5500(30)  | 5650(16)  | 34(7)  |
| H(22B) | 10870(40) | 4300(20)  | 5282(14)  | 23(6)  |
| H(22)  | 7030(50)  | 5350(30)  | 5023(16)  | 35(7)  |
| H(25A) | 7230(60)  | 1810(30)  | 4493(19)  | 47(8)  |
| H(27)  | 3300(50)  | 750(30)   | 3533(17)  | 40(7)  |
| H(28)  | 210(50)   | 690(30)   | 2883(17)  | 36(7)  |
| H(29)  | -1880(40) | 2500(20)  | 2611(15)  | 25(6)  |
| H(30)  | -880(40)  | 4320(20)  | 2956(15)  | 29(6)  |
| H(32)  | 1690(50)  | 5460(20)  | 3610(16)  | 32(6)  |
| H(33)  | 4610(50)  | 5470(30)  | 4329(16)  | 33(7)  |
| H(42)  | 9420(40)  | 6030(20)  | 1230(14)  | 22(6)  |
| H(44)  | 6060(40)  | 4460(20)  | 2253(15)  | 26(6)  |
| H(45)  | 3330(50)  | 3380(30)  | 1813(16)  | 33(7)  |
| H(46)  | 1810(50)  | 3930(30)  | 636(18)   | 46(8)  |
| H(47)  | 3080(50)  | 5650(30)  | -107(17)  | 36(7)  |
| H(50)  | 3760(40)  | 8270(20)  | 1202(14)  | 24(6)  |
| H(51)  | 2610(50)  | 9980(30)  | 1779(17)  | 39(7)  |
| H(52)  | 5090(60)  | 11480(40) | 1930(20)  | 66(11) |
| H(53)  | 8700(50)  | 11250(30) | 1462(18)  | 46(8)  |
| H(54)  | 9840(50)  | 9460(30)  | 851(17)   | 39(7)  |
| H(55A) | 9870(40)  | 6780(30)  | -22(16)   | 31(6)  |
| H(55B) | 10940(50) | 7720(30)  | 445(18)   | 47(8)  |
| H(55C) | 9400(40)  | 8220(20)  | -234(16)  | 32(6)  |
| H(57)  | 4990(50)  | 6800(20)  | 2517(16)  | 35(7)  |

|        |           |           |          |       |
|--------|-----------|-----------|----------|-------|
| H(58)  | 5190(50)  | 7670(20)  | 3685(16) | 31(6) |
| H(60)  | 11560(50) | 8030(20)  | 3210(15) | 33(7) |
| H(61)  | 11350(50) | 7140(30)  | 2033(17) | 37(7) |
| H(62A) | 9090(40)  | 7770(20)  | 4658(14) | 17(5) |
| H(62B) | 9630(40)  | 9020(20)  | 4287(14) | 26(6) |
| H(62)  | 6180(40)  | 9590(30)  | 4581(15) | 26(6) |
| H(65A) | 3540(50)  | 6690(30)  | 5803(19) | 42(8) |
| H(67)  | -1270(50) | 6940(30)  | 6763(16) | 37(7) |
| H(68)  | -4470(50) | 7860(30)  | 7257(17) | 39(7) |
| H(69)  | -5250(50) | 9900(30)  | 7104(18) | 44(8) |
| H(70)  | -2680(40) | 11190(30) | 6408(16) | 32(6) |
| H(72)  | 650(50)   | 11360(30) | 5649(17) | 38(7) |
| H(73)  | 3860(40)  | 10480(20) | 5077(15) | 28(6) |

---

**Table 6. Torsion angles [°] for JF2920F.**

|                       |             |
|-----------------------|-------------|
| C(9)-C(1)-O(1)-C(8)   | -128.27(17) |
| C(15)-C(1)-O(1)-C(8)  | 110.0(2)    |
| C(2)-C(1)-O(1)-C(8)   | -7.4(2)     |
| O(1)-C(1)-C(2)-C(3)   | 6.89(19)    |
| C(9)-C(1)-C(2)-C(3)   | 123.28(19)  |
| C(15)-C(1)-C(2)-C(3)  | -108.0(2)   |
| O(1)-C(1)-C(2)-C(16)  | -117.53(19) |
| C(9)-C(1)-C(2)-C(16)  | -1.1(3)     |
| C(15)-C(1)-C(2)-C(16) | 127.6(2)    |
| C(16)-C(2)-C(3)-C(8)  | 120.11(19)  |
| C(1)-C(2)-C(3)-C(8)   | -4.3(2)     |
| C(16)-C(2)-C(3)-C(4)  | -58.2(3)    |
| C(1)-C(2)-C(3)-C(4)   | 177.4(2)    |
| C(8)-C(3)-C(4)-C(5)   | 0.0(3)      |
| C(2)-C(3)-C(4)-C(5)   | 178.2(2)    |
| C(3)-C(4)-C(5)-C(6)   | 0.6(3)      |
| C(4)-C(5)-C(6)-C(7)   | -0.5(3)     |
| C(5)-C(6)-C(7)-C(8)   | -0.2(3)     |



|                         |             |
|-------------------------|-------------|
| C(1)-O(1)-C(8)-C(7)     | -175.8(2)   |
| C(1)-O(1)-C(8)-C(3)     | 5.0(2)      |
| C(6)-C(7)-C(8)-O(1)     | -178.3(2)   |
| C(6)-C(7)-C(8)-C(3)     | 0.8(3)      |
| C(4)-C(3)-C(8)-O(1)     | 178.49(19)  |
| C(2)-C(3)-C(8)-O(1)     | -0.1(2)     |
| C(4)-C(3)-C(8)-C(7)     | -0.7(3)     |
| C(2)-C(3)-C(8)-C(7)     | -179.31(19) |
| O(1)-C(1)-C(9)-C(10)    | 36.3(2)     |
| C(15)-C(1)-C(9)-C(10)   | 153.3(2)    |
| C(2)-C(1)-C(9)-C(10)    | -79.8(2)    |
| O(1)-C(1)-C(9)-C(14)    | -149.40(19) |
| C(15)-C(1)-C(9)-C(14)   | -32.4(3)    |
| C(2)-C(1)-C(9)-C(14)    | 94.5(2)     |
| C(14)-C(9)-C(10)-C(11)  | -1.7(3)     |
| C(1)-C(9)-C(10)-C(11)   | 172.7(2)    |
| C(9)-C(10)-C(11)-C(12)  | 0.0(4)      |
| C(10)-C(11)-C(12)-C(13) | 1.9(4)      |
| C(11)-C(12)-C(13)-C(14) | -2.2(4)     |
| C(10)-C(9)-C(14)-C(13)  | 1.5(3)      |
| C(1)-C(9)-C(14)-C(13)   | -173.0(2)   |
| C(12)-C(13)-C(14)-C(9)  | 0.5(4)      |
| C(3)-C(2)-C(16)-C(21)   | -25.8(3)    |
| C(1)-C(2)-C(16)-C(21)   | 91.0(2)     |
| C(3)-C(2)-C(16)-C(17)   | 157.83(18)  |
| C(1)-C(2)-C(16)-C(17)   | -85.4(2)    |
| C(21)-C(16)-C(17)-C(18) | -1.7(3)     |
| C(2)-C(16)-C(17)-C(18)  | 174.80(18)  |
| C(16)-C(17)-C(18)-C(19) | 0.5(3)      |
| C(17)-C(18)-C(19)-C(20) | 1.1(3)      |
| C(17)-C(18)-C(19)-C(22) | -176.86(19) |
| C(18)-C(19)-C(20)-C(21) | -1.4(3)     |
| C(22)-C(19)-C(20)-C(21) | 176.62(18)  |
| C(19)-C(20)-C(21)-C(16) | 0.1(3)      |
| C(17)-C(16)-C(21)-C(20) | 1.4(3)      |
| C(2)-C(16)-C(21)-C(20)  | -175.00(19) |

|                         |             |
|-------------------------|-------------|
| C(18)-C(19)-C(22)-N(22) | -38.0(3)    |
| C(20)-C(19)-C(22)-N(22) | 144.08(18)  |
| C(19)-C(22)-N(22)-C(23) | -70.0(2)    |
| C(22)-N(22)-C(23)-O(23) | 1.1(3)      |
| C(22)-N(22)-C(23)-C(24) | -179.89(17) |
| O(23)-C(23)-C(24)-C(25) | 4.5(3)      |
| N(22)-C(23)-C(24)-C(25) | -174.53(17) |
| O(23)-C(23)-C(24)-C(33) | -175.43(17) |
| N(22)-C(23)-C(24)-C(33) | 5.5(3)      |
| C(33)-C(24)-C(25)-O(25) | 177.12(17)  |
| C(23)-C(24)-C(25)-O(25) | -2.8(3)     |
| C(33)-C(24)-C(25)-C(26) | -3.4(3)     |
| C(23)-C(24)-C(25)-C(26) | 176.68(16)  |
| O(25)-C(25)-C(26)-C(27) | 3.0(3)      |
| C(24)-C(25)-C(26)-C(27) | -176.50(18) |
| O(25)-C(25)-C(26)-C(31) | -177.87(16) |
| C(24)-C(25)-C(26)-C(31) | 2.6(3)      |
| C(31)-C(26)-C(27)-C(28) | -1.1(3)     |
| C(25)-C(26)-C(27)-C(28) | 178.08(18)  |
| C(26)-C(27)-C(28)-C(29) | 1.3(3)      |
| C(27)-C(28)-C(29)-C(30) | -0.2(3)     |
| C(28)-C(29)-C(30)-C(31) | -1.3(3)     |
| C(29)-C(30)-C(31)-C(26) | 1.5(3)      |
| C(29)-C(30)-C(31)-C(32) | -178.1(2)   |
| C(27)-C(26)-C(31)-C(30) | -0.4(3)     |
| C(25)-C(26)-C(31)-C(30) | -179.53(17) |
| C(27)-C(26)-C(31)-C(32) | 179.29(18)  |
| C(25)-C(26)-C(31)-C(32) | 0.1(3)      |
| C(30)-C(31)-C(32)-C(33) | 177.52(19)  |
| C(26)-C(31)-C(32)-C(33) | -2.1(3)     |
| C(31)-C(32)-C(33)-C(24) | 1.4(3)      |
| C(25)-C(24)-C(33)-C(32) | 1.4(3)      |
| C(23)-C(24)-C(33)-C(32) | -178.69(18) |
| C(49)-C(41)-O(41)-C(48) | -114.88(17) |
| C(55)-C(41)-O(41)-C(48) | 123.44(17)  |
| C(42)-C(41)-O(41)-C(48) | 5.1(2)      |

|                         |             |
|-------------------------|-------------|
| O(41)-C(41)-C(42)-C(43) | -7.96(19)   |
| C(49)-C(41)-C(42)-C(43) | 109.24(18)  |
| C(55)-C(41)-C(42)-C(43) | -122.00(18) |
| O(41)-C(41)-C(42)-C(56) | -134.91(17) |
| C(49)-C(41)-C(42)-C(56) | -17.7(2)    |
| C(55)-C(41)-C(42)-C(56) | 111.1(2)    |
| C(56)-C(42)-C(43)-C(48) | 134.39(18)  |
| C(41)-C(42)-C(43)-C(48) | 8.3(2)      |
| C(56)-C(42)-C(43)-C(44) | -47.6(3)    |
| C(41)-C(42)-C(43)-C(44) | -173.7(2)   |
| C(48)-C(43)-C(44)-C(45) | 2.2(3)      |
| C(42)-C(43)-C(44)-C(45) | -175.6(2)   |
| C(43)-C(44)-C(45)-C(46) | 1.1(3)      |
| C(44)-C(45)-C(46)-C(47) | -2.4(3)     |
| C(45)-C(46)-C(47)-C(48) | 0.4(3)      |
| C(41)-O(41)-C(48)-C(43) | 0.3(2)      |
| C(41)-O(41)-C(48)-C(47) | -179.53(18) |
| C(44)-C(43)-C(48)-O(41) | 175.79(16)  |
| C(42)-C(43)-C(48)-O(41) | -5.9(2)     |
| C(44)-C(43)-C(48)-C(47) | -4.4(3)     |
| C(42)-C(43)-C(48)-C(47) | 173.85(18)  |
| C(46)-C(47)-C(48)-O(41) | -177.16(18) |
| C(46)-C(47)-C(48)-C(43) | 3.1(3)      |
| O(41)-C(41)-C(49)-C(50) | 38.8(2)     |
| C(55)-C(41)-C(49)-C(50) | 155.53(18)  |
| C(42)-C(41)-C(49)-C(50) | -76.5(2)    |
| O(41)-C(41)-C(49)-C(54) | -146.45(17) |
| C(55)-C(41)-C(49)-C(54) | -29.7(3)    |
| C(42)-C(41)-C(49)-C(54) | 98.2(2)     |
| C(54)-C(49)-C(50)-C(51) | -1.9(3)     |
| C(41)-C(49)-C(50)-C(51) | 172.93(19)  |
| C(49)-C(50)-C(51)-C(52) | 0.8(3)      |
| C(50)-C(51)-C(52)-C(53) | 1.1(3)      |
| C(51)-C(52)-C(53)-C(54) | -1.9(3)     |
| C(52)-C(53)-C(54)-C(49) | 0.8(3)      |
| C(50)-C(49)-C(54)-C(53) | 1.1(3)      |

|                         |             |
|-------------------------|-------------|
| C(41)-C(49)-C(54)-C(53) | -173.69(19) |
| C(43)-C(42)-C(56)-C(57) | -26.4(3)    |
| C(41)-C(42)-C(56)-C(57) | 92.9(2)     |
| C(43)-C(42)-C(56)-C(61) | 155.81(18)  |
| C(41)-C(42)-C(56)-C(61) | -84.9(2)    |
| C(61)-C(56)-C(57)-C(58) | 0.8(3)      |
| C(42)-C(56)-C(57)-C(58) | -176.97(18) |
| C(56)-C(57)-C(58)-C(59) | -0.2(3)     |
| C(57)-C(58)-C(59)-C(60) | 0.0(3)      |
| C(57)-C(58)-C(59)-C(62) | -177.09(18) |
| C(58)-C(59)-C(60)-C(61) | -0.6(3)     |
| C(62)-C(59)-C(60)-C(61) | 176.55(18)  |
| C(59)-C(60)-C(61)-C(56) | 1.4(3)      |
| C(57)-C(56)-C(61)-C(60) | -1.4(3)     |
| C(42)-C(56)-C(61)-C(60) | 176.41(17)  |
| C(58)-C(59)-C(62)-N(62) | -22.5(3)    |
| C(60)-C(59)-C(62)-N(62) | 160.41(17)  |
| C(59)-C(62)-N(62)-C(63) | 88.3(2)     |
| C(62)-N(62)-C(63)-O(63) | -2.5(3)     |
| C(62)-N(62)-C(63)-C(64) | 178.36(16)  |
| O(63)-C(63)-C(64)-C(65) | -0.8(3)     |
| N(62)-C(63)-C(64)-C(65) | 178.27(17)  |
| O(63)-C(63)-C(64)-C(73) | 179.54(18)  |
| N(62)-C(63)-C(64)-C(73) | -1.4(3)     |
| C(73)-C(64)-C(65)-O(65) | -177.78(18) |
| C(63)-C(64)-C(65)-O(65) | 2.6(3)      |
| C(73)-C(64)-C(65)-C(66) | 1.9(3)      |
| C(63)-C(64)-C(65)-C(66) | -177.75(16) |
| O(65)-C(65)-C(66)-C(67) | -4.0(3)     |
| C(64)-C(65)-C(66)-C(67) | 176.28(18)  |
| O(65)-C(65)-C(66)-C(71) | 177.29(17)  |
| C(64)-C(65)-C(66)-C(71) | -2.4(3)     |
| C(71)-C(66)-C(67)-C(68) | -1.1(3)     |
| C(65)-C(66)-C(67)-C(68) | -179.78(19) |
| C(66)-C(67)-C(68)-C(69) | -0.5(3)     |
| C(67)-C(68)-C(69)-C(70) | 1.2(4)      |

|                         |             |
|-------------------------|-------------|
| C(68)-C(69)-C(70)-C(71) | -0.2(4)     |
| C(69)-C(70)-C(71)-C(72) | 178.3(2)    |
| C(69)-C(70)-C(71)-C(66) | -1.4(3)     |
| C(67)-C(66)-C(71)-C(70) | 2.1(3)      |
| C(65)-C(66)-C(71)-C(70) | -179.22(18) |
| C(67)-C(66)-C(71)-C(72) | -177.64(19) |
| C(65)-C(66)-C(71)-C(72) | 1.1(3)      |
| C(70)-C(71)-C(72)-C(73) | -178.97(19) |
| C(66)-C(71)-C(72)-C(73) | 0.7(3)      |
| C(71)-C(72)-C(73)-C(64) | -1.3(3)     |
| C(65)-C(64)-C(73)-C(72) | -0.1(3)     |
| C(63)-C(64)-C(73)-C(72) | 179.59(18)  |

---

Symmetry transformations used to generate equivalent atoms:

**Table 7. Hydrogen bonds for JF2920F [Å and °].**

---

| D-H...A                | d(D-H)  | d(H...A) | d(D...A)   | <(DHA) |
|------------------------|---------|----------|------------|--------|
| —                      |         |          |            |        |
| C(22)-H(22A)...O(65)#1 | 1.02(3) | 2.39(3)  | 3.281(3)   | 145(2) |
| N(22)-H(22)...O(63)    | 0.90(3) | 2.08(3)  | 2.939(2)   | 158(3) |
| O(25)-H(25A)...O(23)   | 0.97(4) | 1.55(3)  | 2.4680(19) | 155(3) |
| N(62)-H(62)...O(25)#2  | 0.88(3) | 2.25(3)  | 3.104(2)   | 164(2) |
| O(65)-H(65A)...O(63)   | 0.93(3) | 1.67(3)  | 2.547(2)   | 157(3) |

---

Symmetry transformations used to generate equivalent atoms:

#1 x+1,y,z #2 x,y+1,z

NMR Spectra

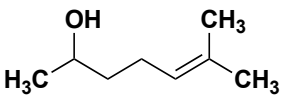

28  
<sup>1</sup>H, 400 MHz, CDCl<sub>3</sub>

— 7.27 CDCl<sub>3</sub>

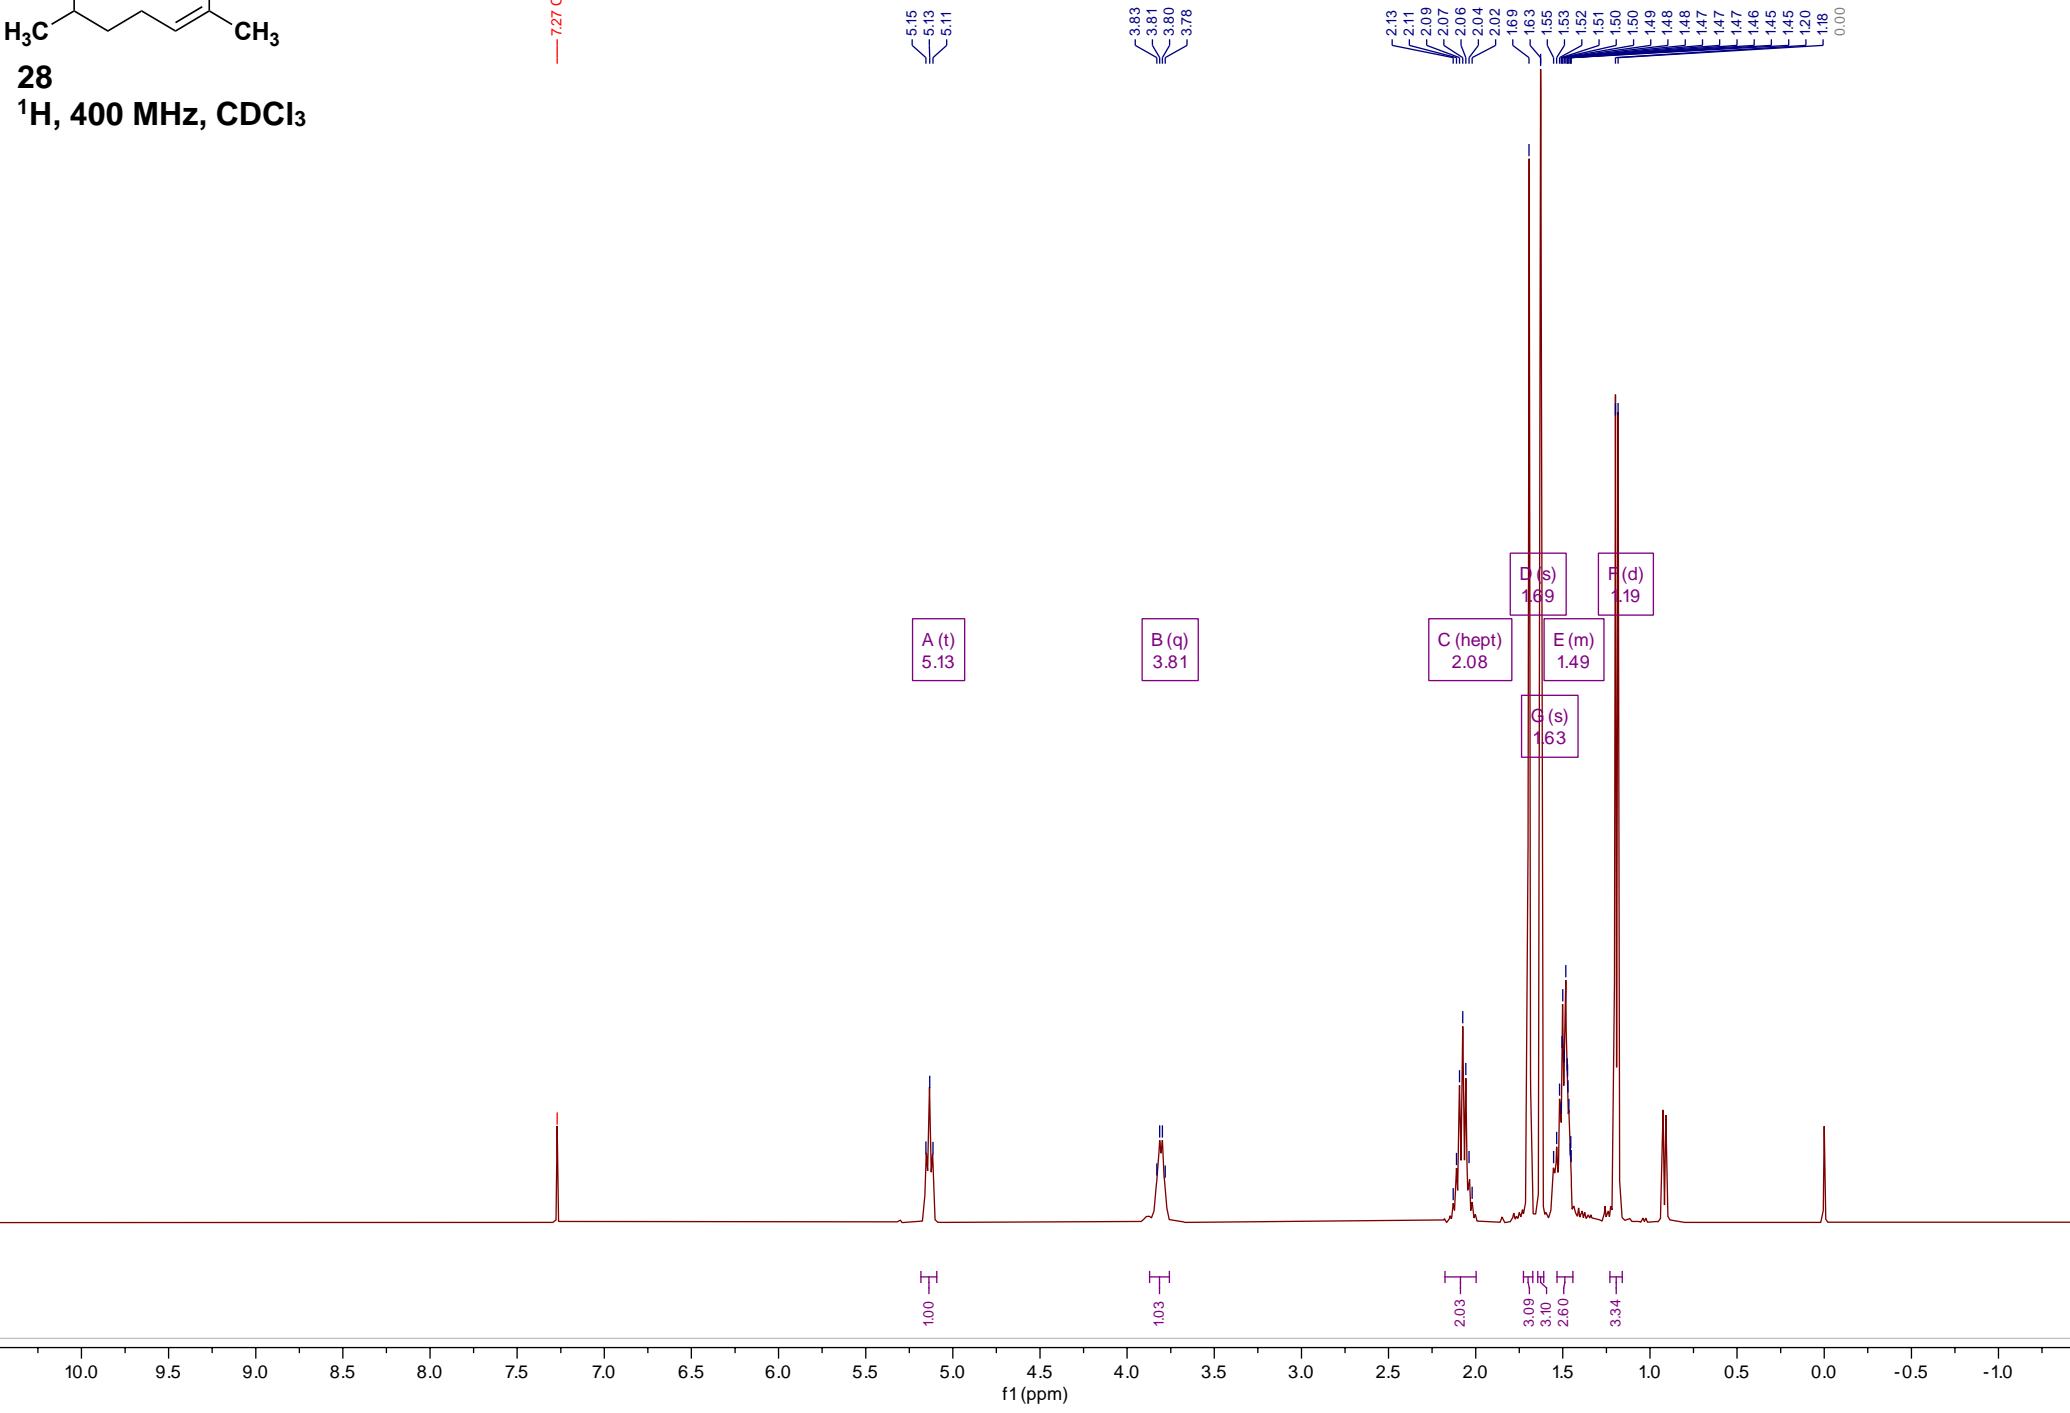

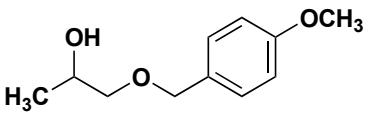

**29**  
 $^1\text{H}$ , 400 MHz,  $\text{CDCl}_3$

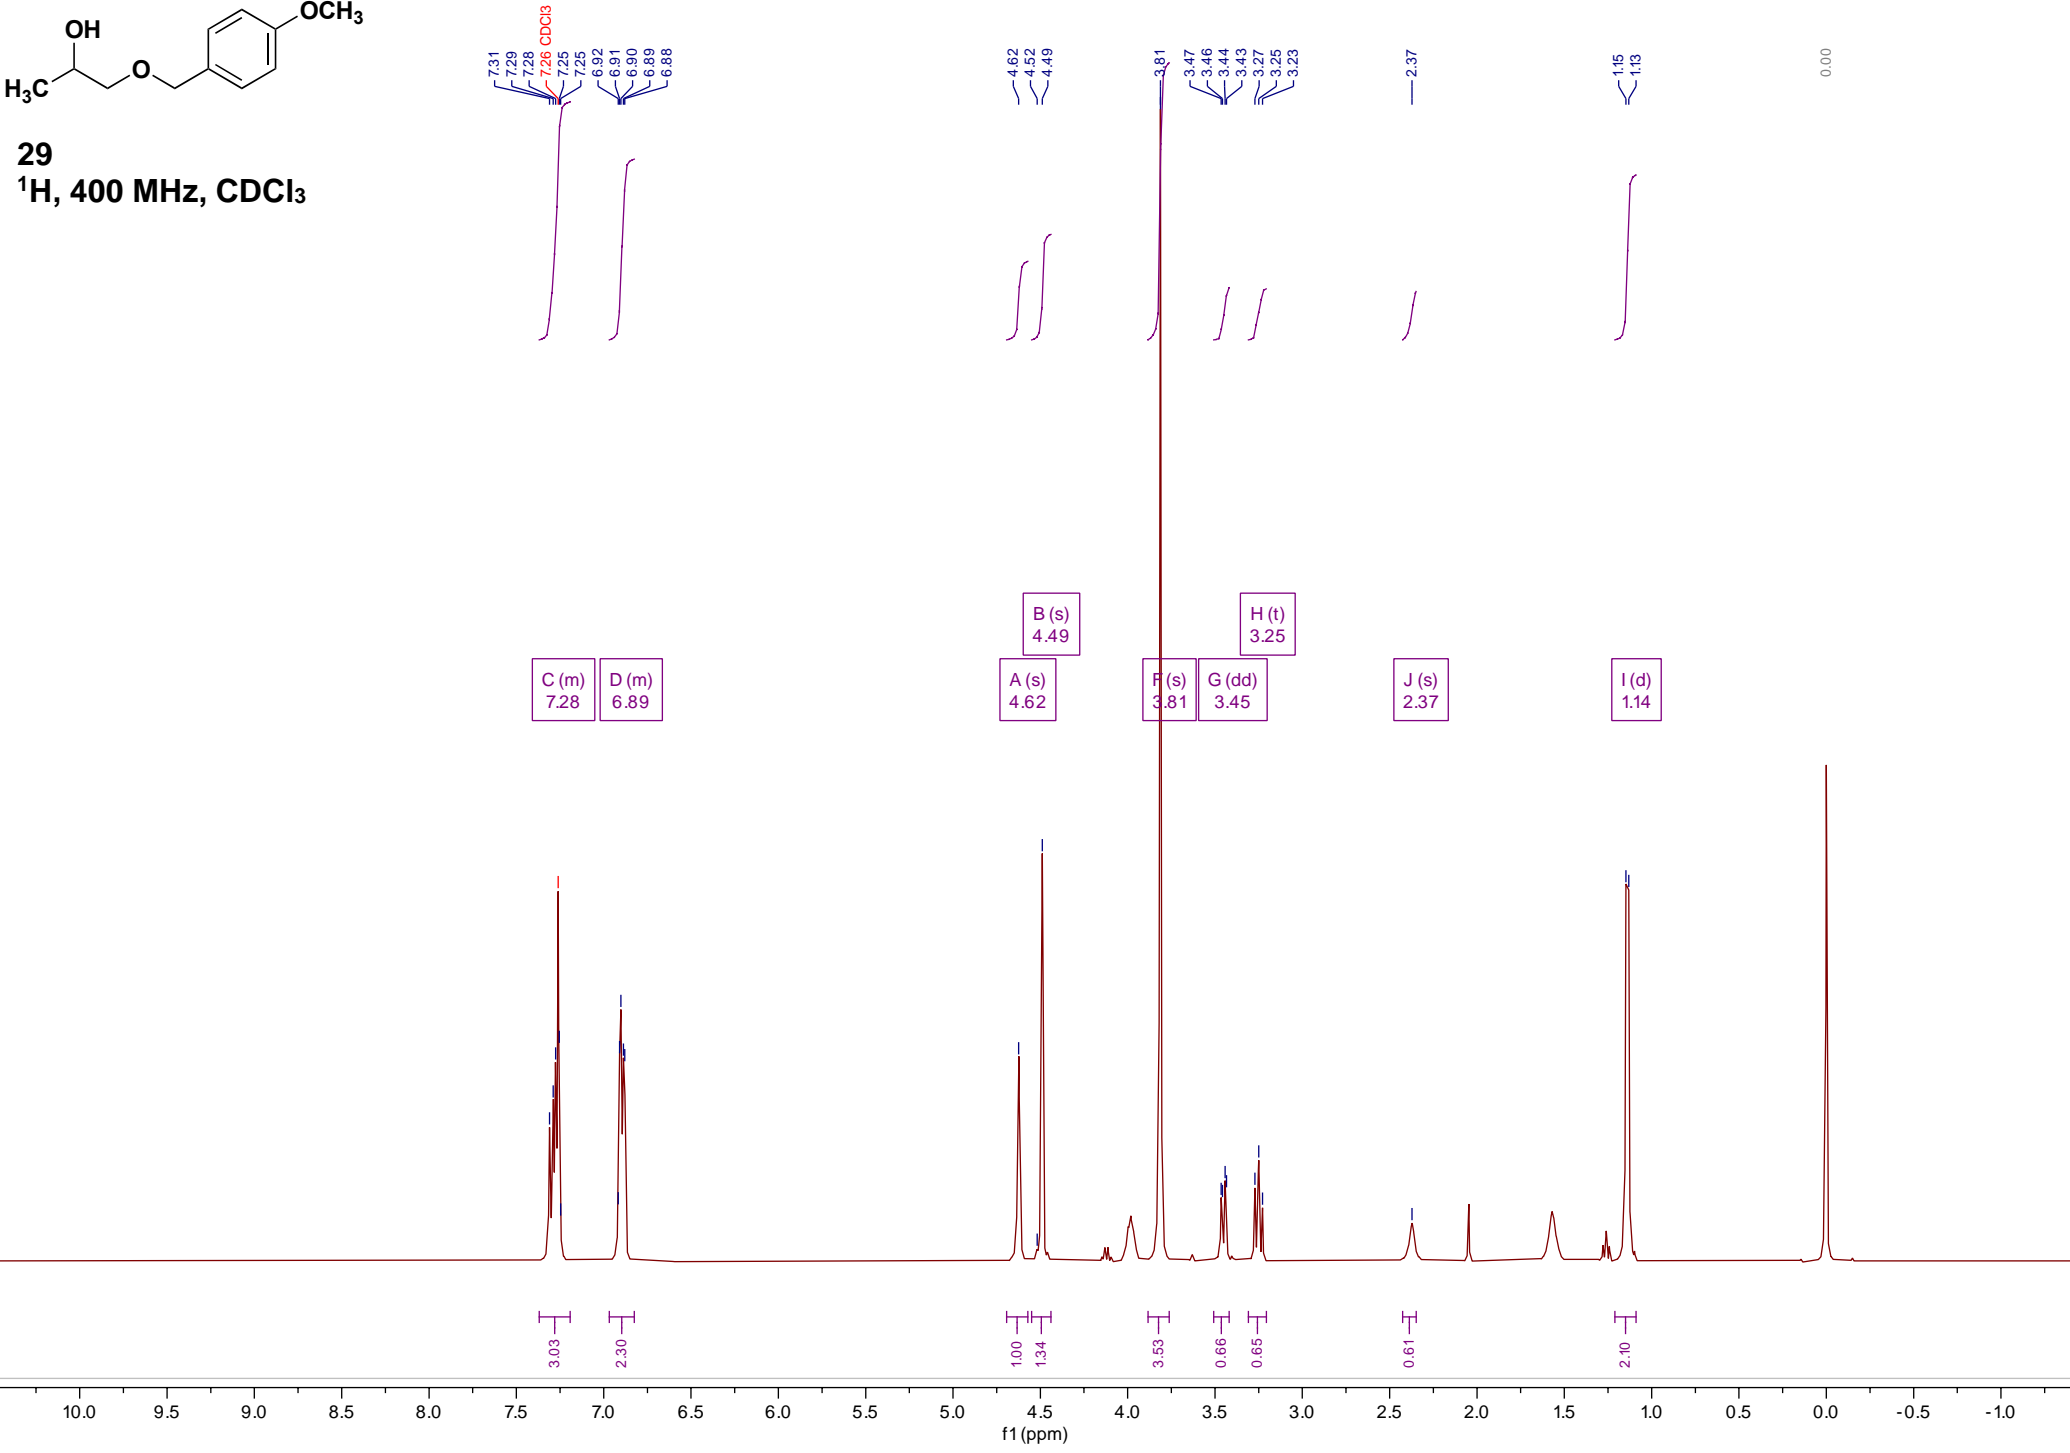



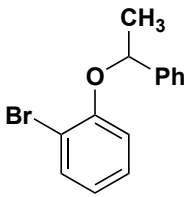

30  
<sup>1</sup>H, 600 MHz, CDCl<sub>3</sub>

7.51  
7.50  
7.39  
7.38  
7.34  
7.32  
7.31  
7.26 cdcl3  
7.25  
7.25  
7.23  
7.07  
7.05  
6.75  
6.74  
6.73  
6.72  
6.72  
5.35  
5.34  
5.33  
5.32

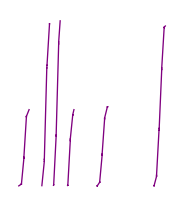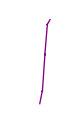

1.68  
1.67

0.00

G (t)  
7.24

C (m)  
7.39

B (d)  
7.50

E (t)  
7.06

F (m)  
6.73

D (t)  
7.32

A (q)  
5.34

H (d)  
1.67

0.91  
1.93  
1.96  
0.90  
0.94  
1.90  
1.00  
3.29

10.0 9.5 9.0 8.5 8.0 7.5 7.0 6.5 6.0 5.5 5.0 4.5 4.0 3.5 3.0 2.5 2.0 1.5 1.0 0.5 0.0 -0.5 -1.0

f1 (ppm)

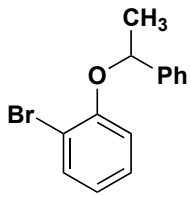

**30**  
**<sup>13</sup>C, 150 MHz, CDCl<sub>3</sub>**

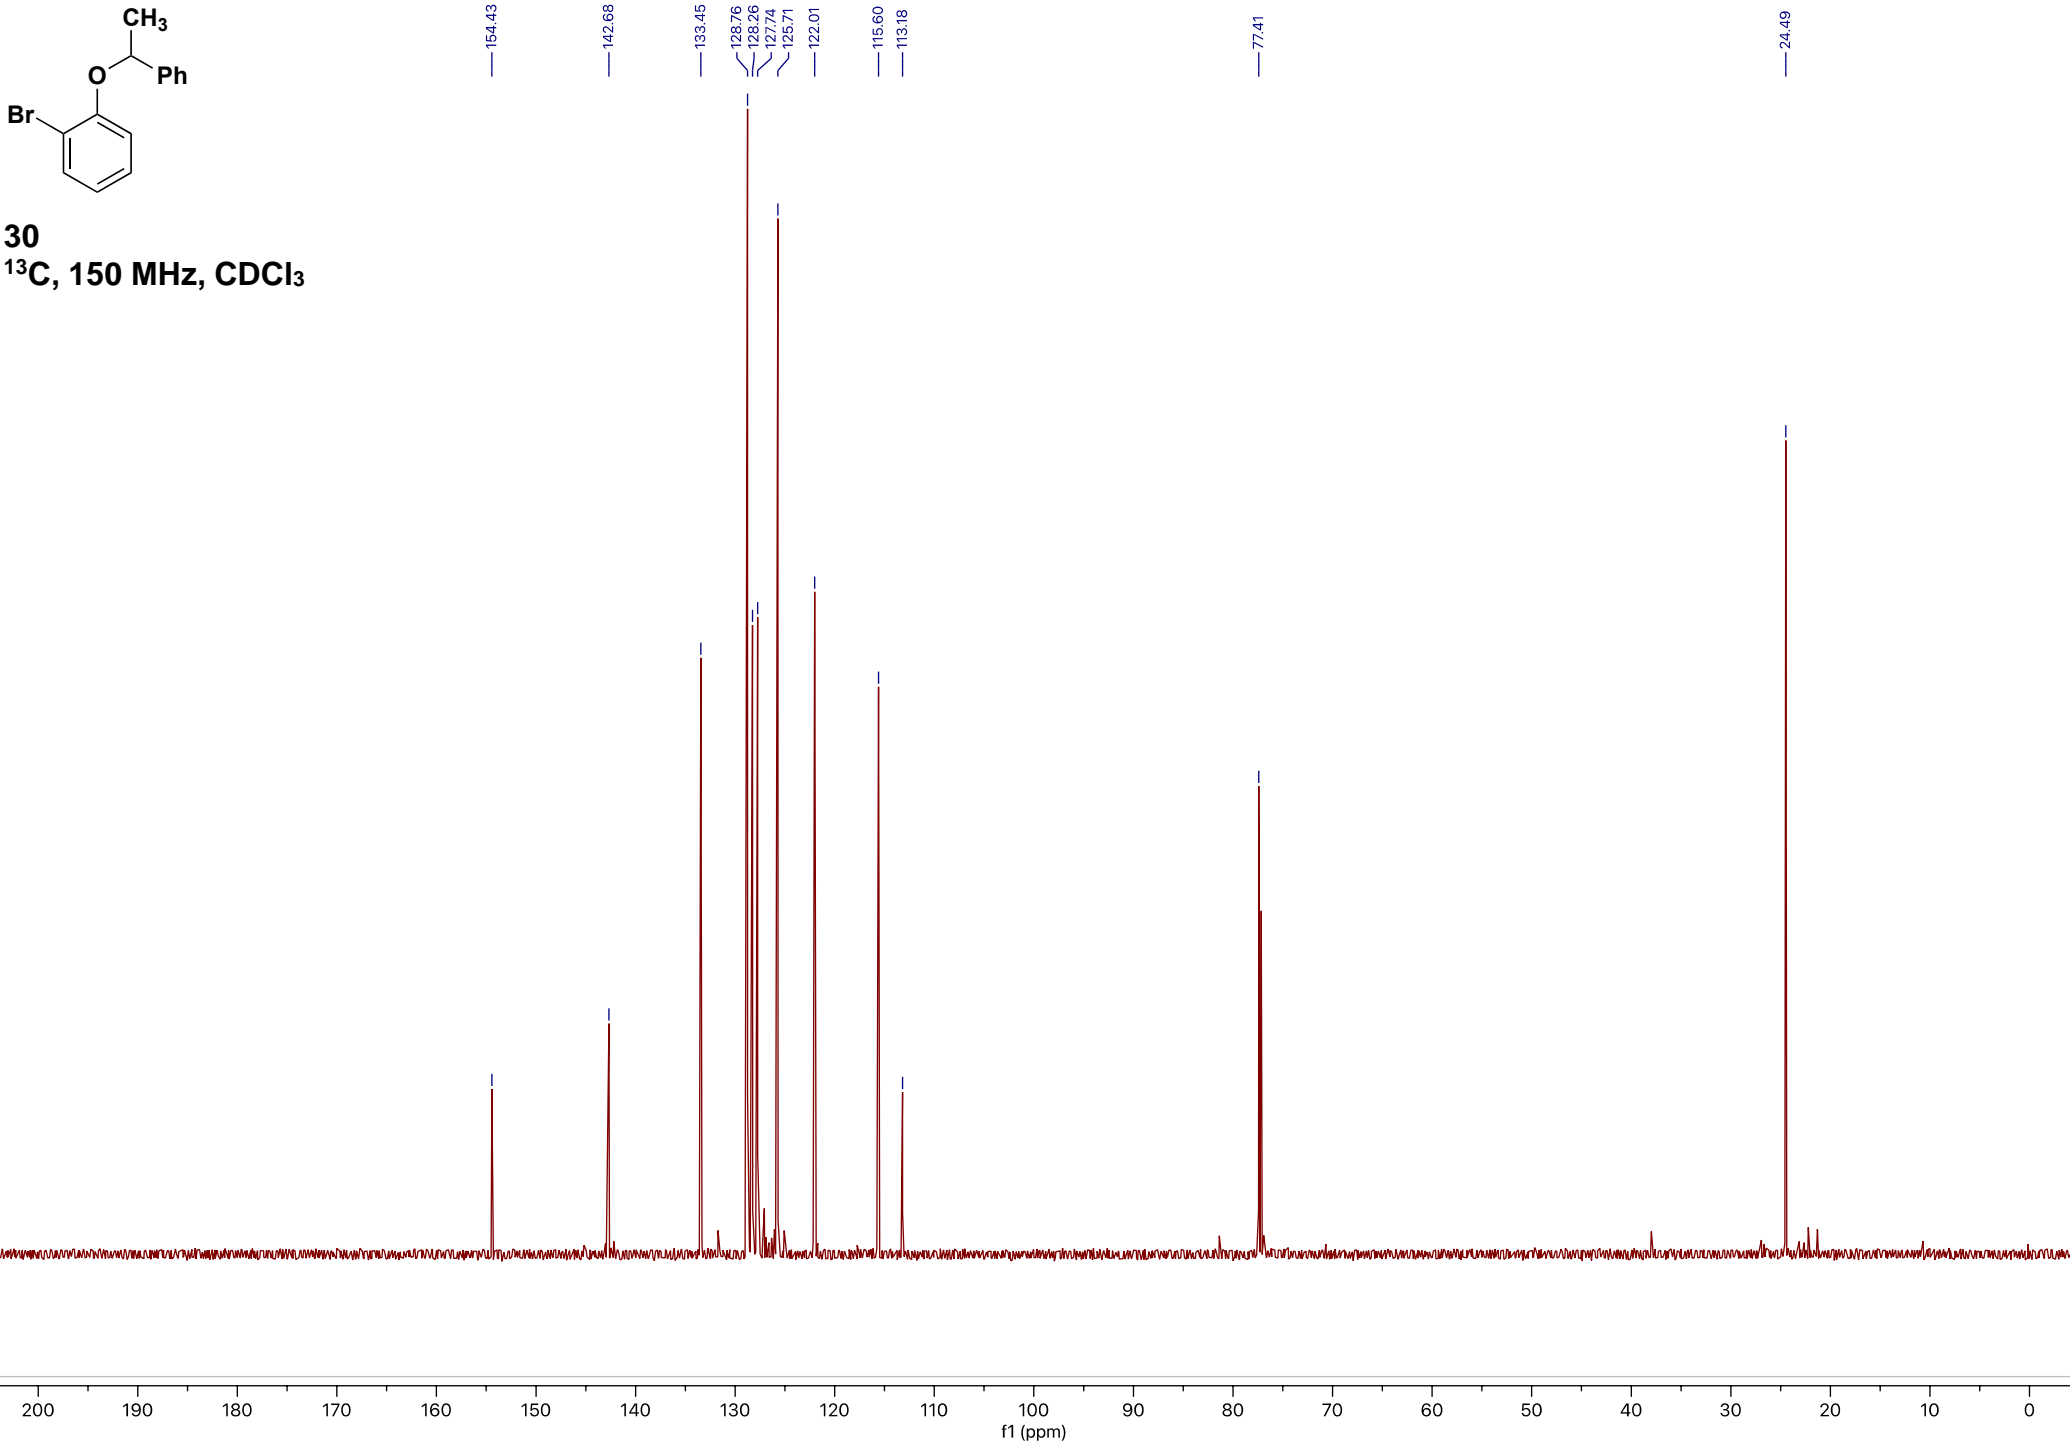

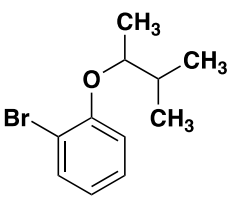

31  
<sup>1</sup>H, 600 MHz, CDCl<sub>3</sub>

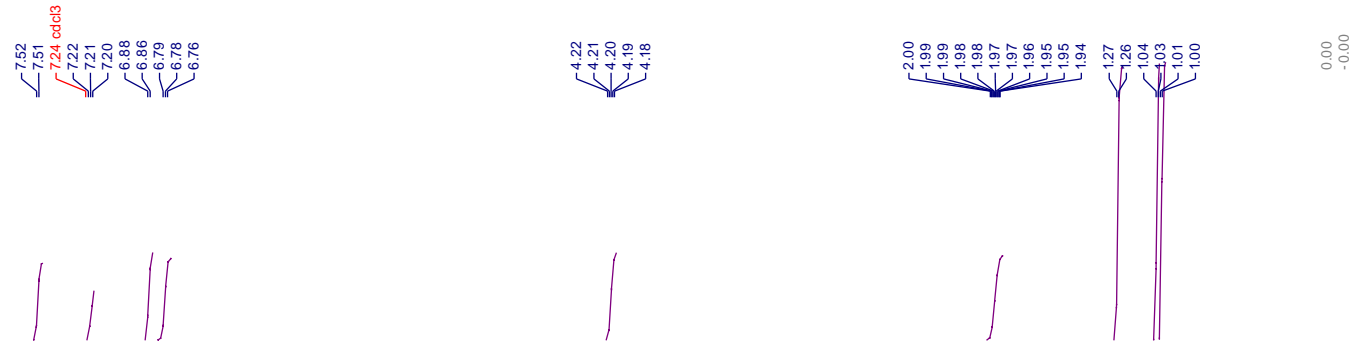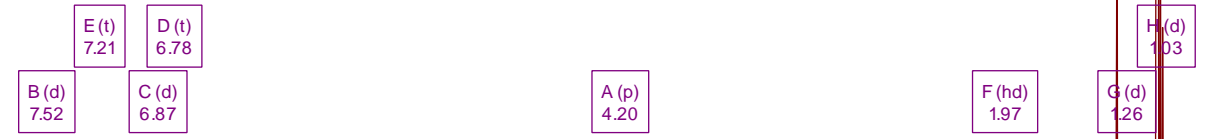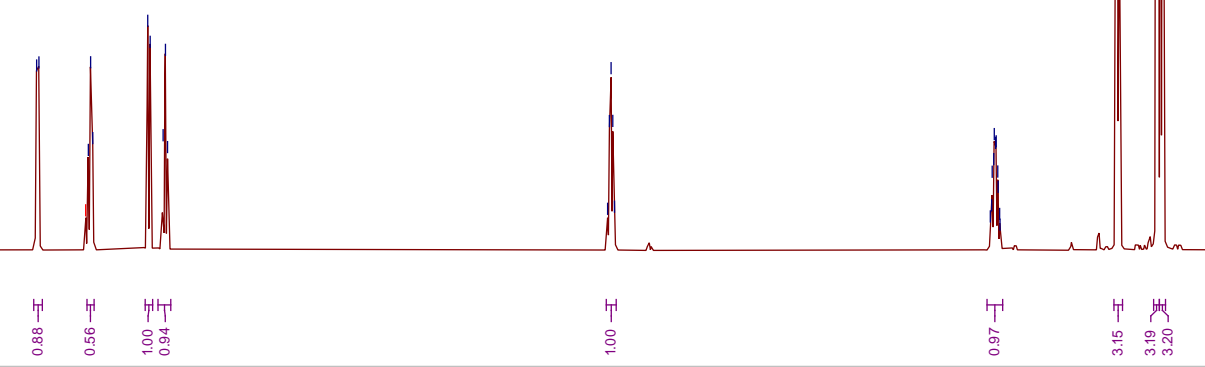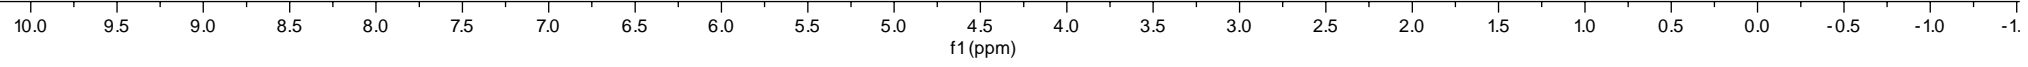

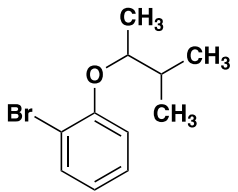

31  
<sup>13</sup>C, 150 MHz, CDCl<sub>3</sub>

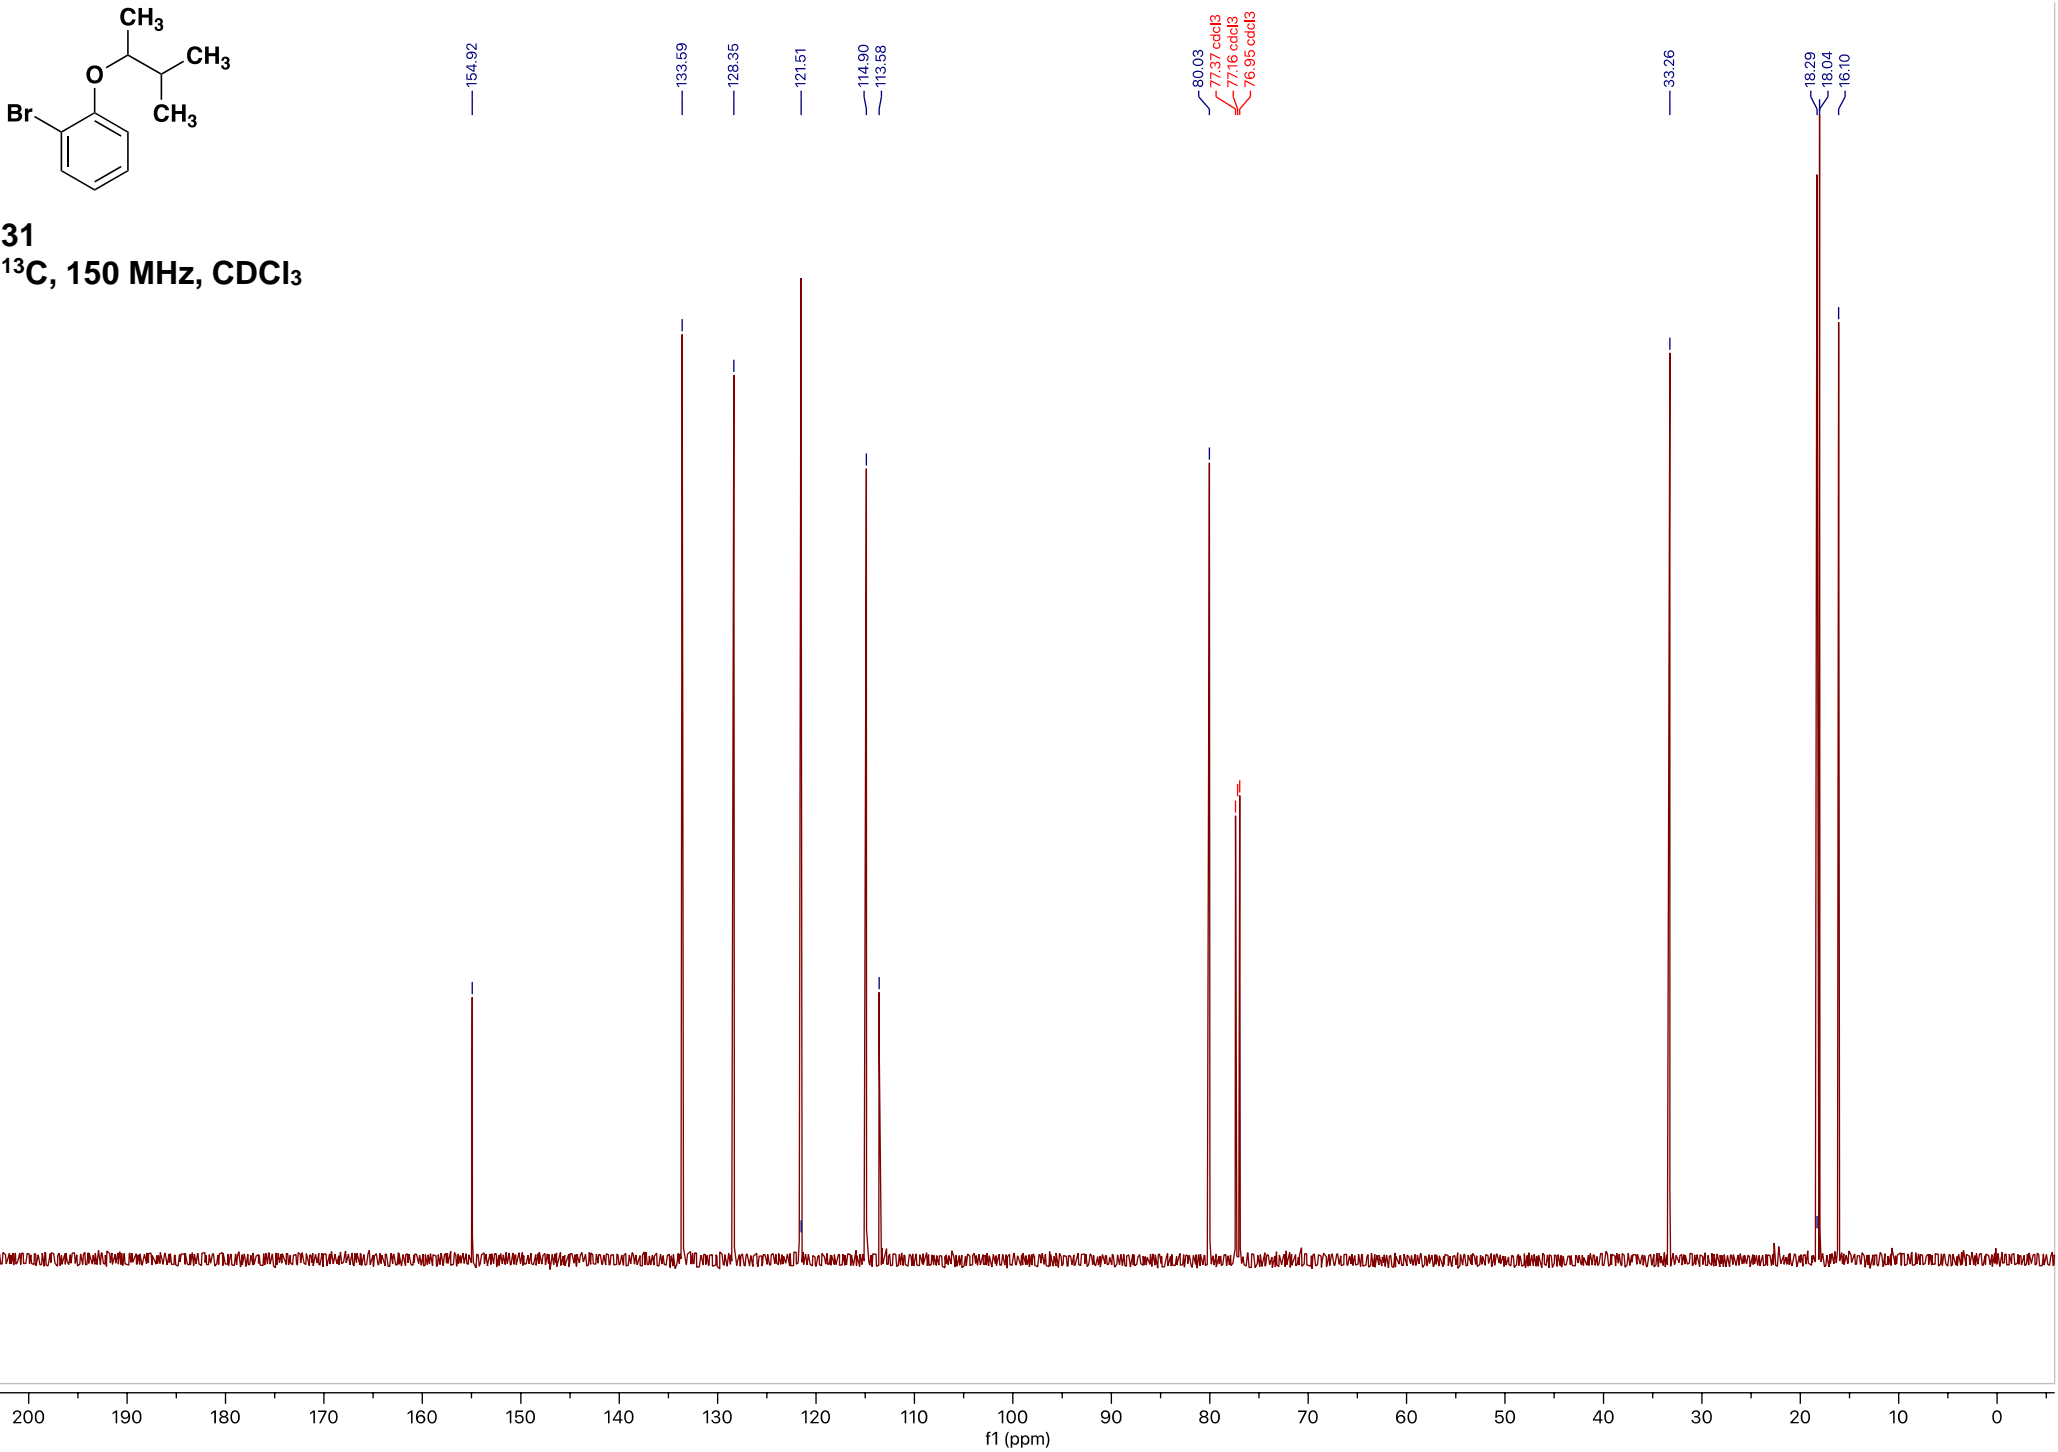

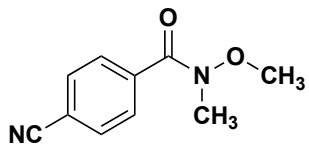

**32**  
**<sup>1</sup>H, 400 MHz, CDCl<sub>3</sub>**

7.79  
7.77  
7.72  
7.70  
— 7.28 CDCl<sub>3</sub>

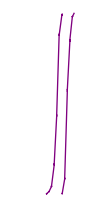

B (d)  
7.71

A (d)  
7.78

2.00  
2.01

3.53  
3.38

D (s)  
3.38

C (s)  
3.53

3.06  
3.08

0.00

10.0 9.5 9.0 8.5 8.0 7.5 7.0 6.5 6.0 5.5 5.0 4.5 4.0 3.5 3.0 2.5 2.0 1.5 1.0 0.5 0.0 -0.5 -1.0  
f1 (ppm)

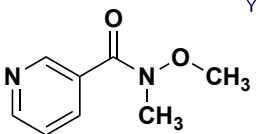

8.96  
8.96  
8.70  
8.69  
8.68  
8.05  
8.04  
8.04  
8.03  
8.02  
7.38  
7.38  
7.37  
7.37  
7.36  
7.36  
7.35  
7.35  
7.27 CDCl<sub>3</sub>

33  
<sup>1</sup>H, 400 MHz, CDCl<sub>3</sub>

B (d)  
8.96

A (dd)  
8.69

C (dt)  
8.03

D (ddd)  
7.37

E (s)  
3.56

F (s)  
3.40

0.01  
0.00

0.98

1.00

0.97

1.00

3.01

3.05

10.0 9.5 9.0 8.5 8.0 7.5 7.0 6.5 6.0 5.5 5.0 4.5 4.0 3.5 3.0 2.5 2.0 1.5 1.0 0.5 0.0 -0.5 -1.0  
f1 (ppm)

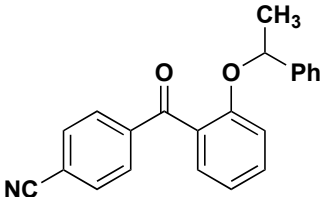

**35**  
<sup>1</sup>H, 600 MHz, CDCl<sub>3</sub>

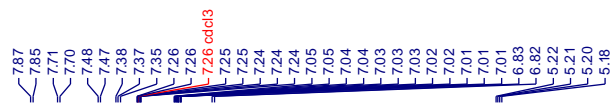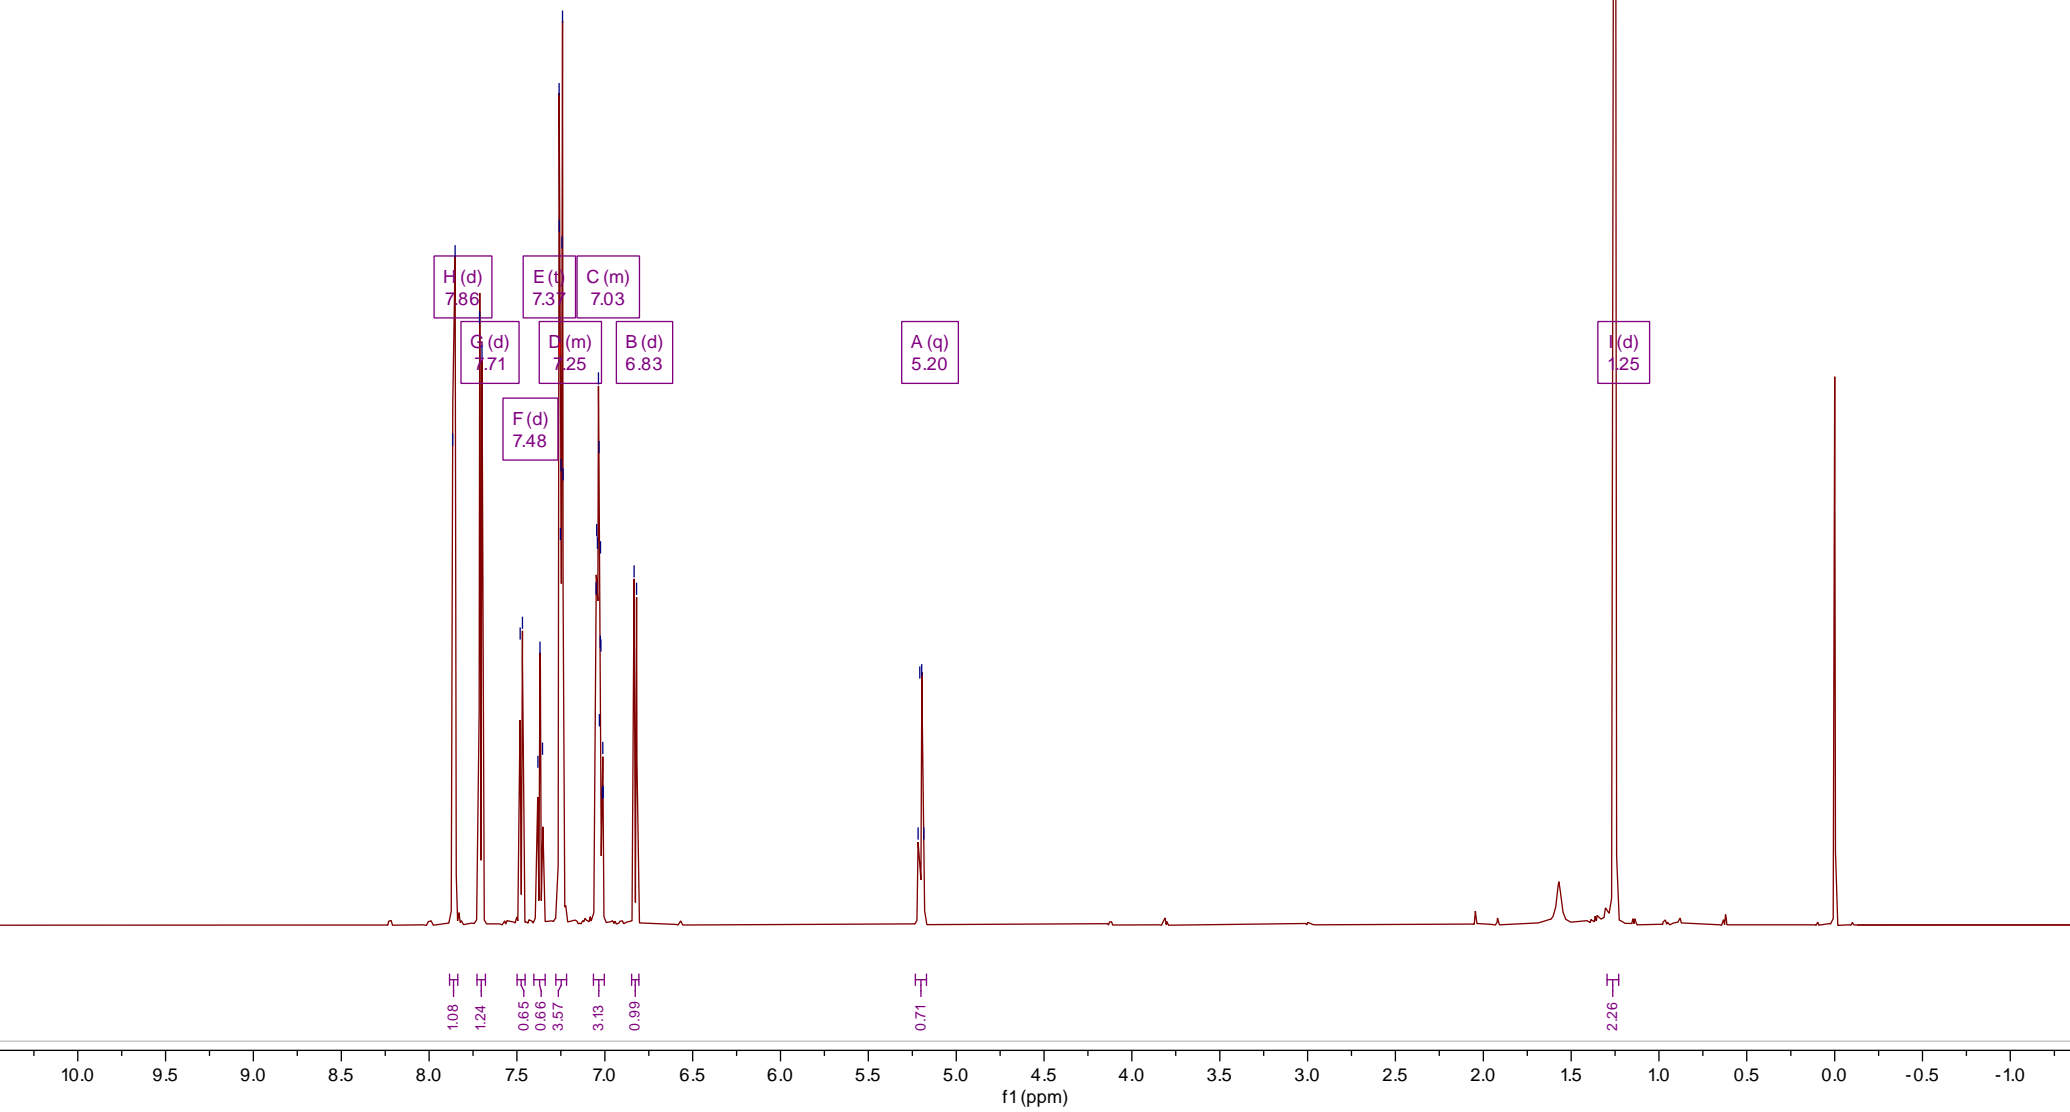

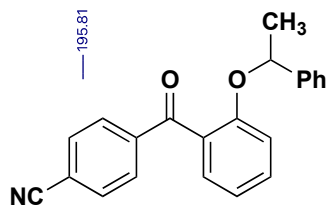

**35**  
**<sup>13</sup>C, 150 MHz, CDCl<sub>3</sub>**

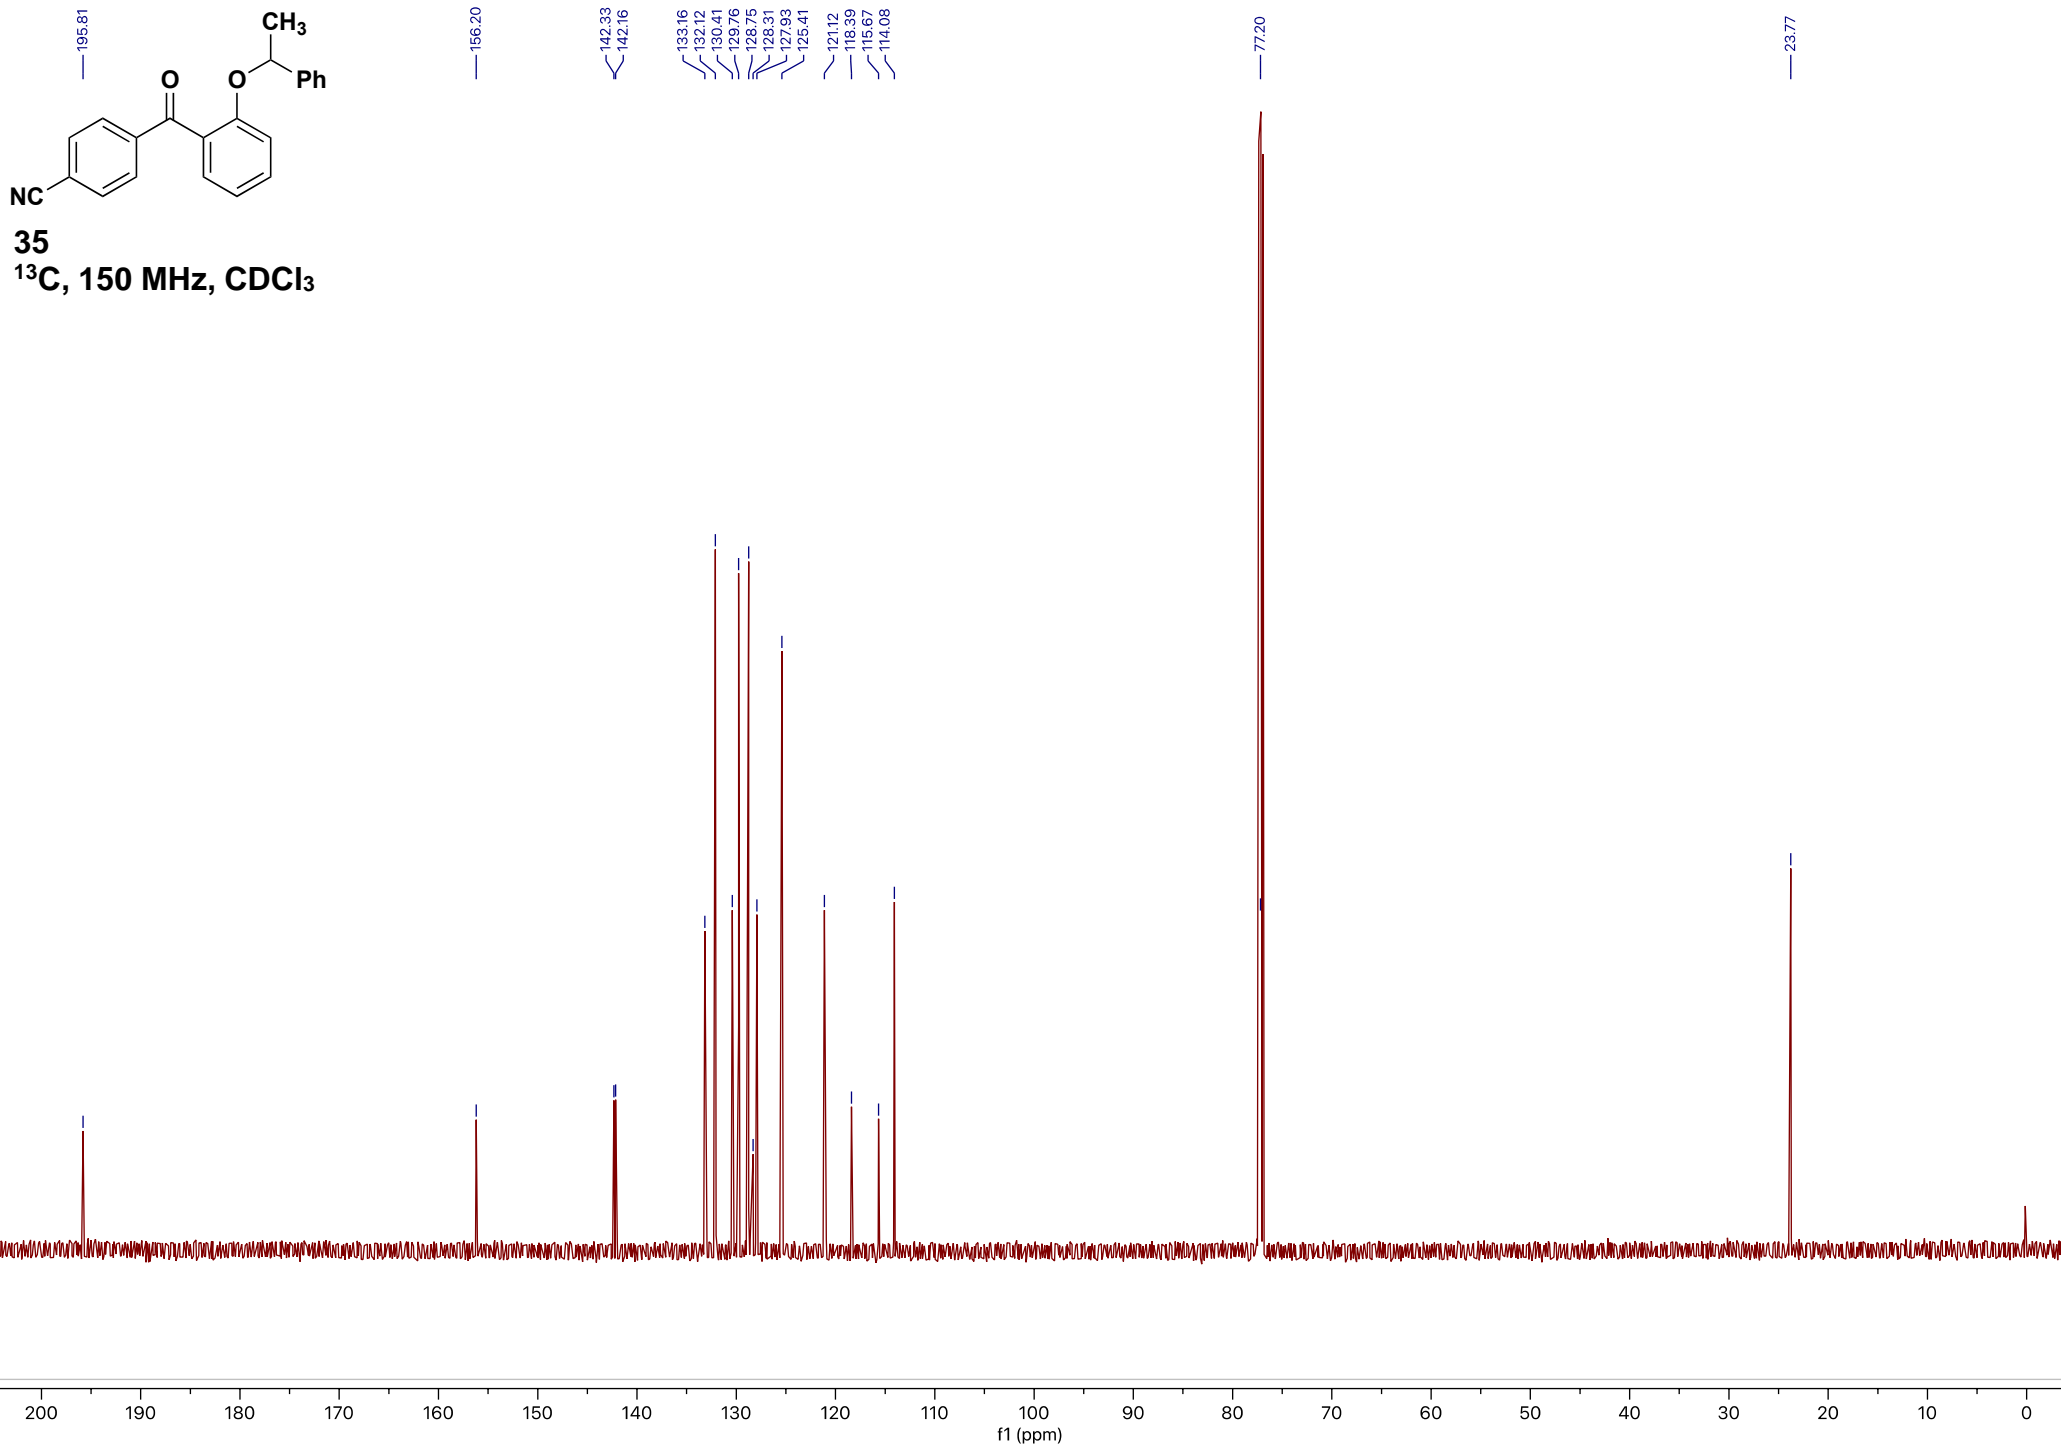



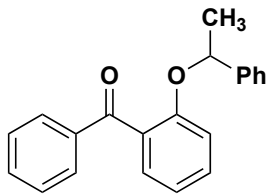

**34**  
<sup>1</sup>H, 600 MHz, CDCl<sub>3</sub>

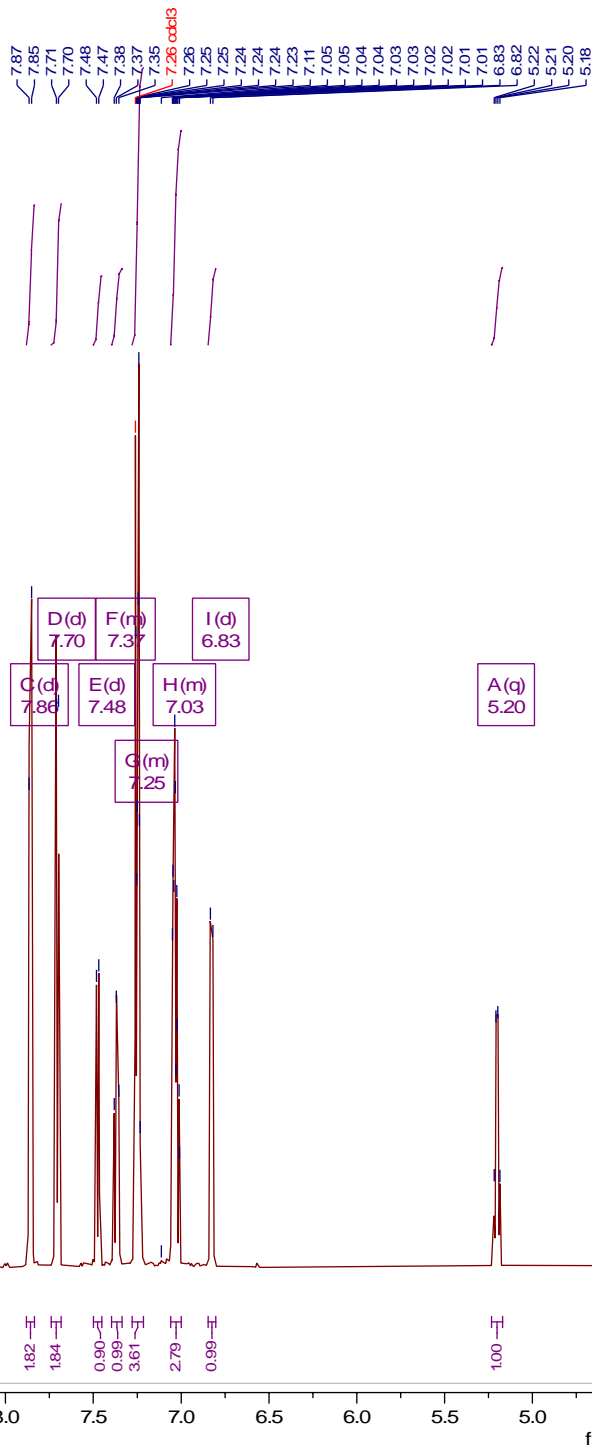

— 157 H<sub>2</sub>O

-0.00  
-0.00

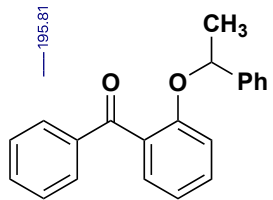

**34**  
 **$^{13}\text{C}$ , 600 MHz,  $\text{CDCl}_3$**

156.20

142.33

142.16

133.17

132.12

130.41

129.76

128.76

128.31

127.93

125.41

121.12

118.39

115.67

114.08

77.37 cdcl3

77.20

77.16 cdcl3

76.95 cdcl3

23.77

200 190 180 170 160 150 140 130 120 110 100 90 80 70 60 50 40 30 20 10 0

f1 (ppm)

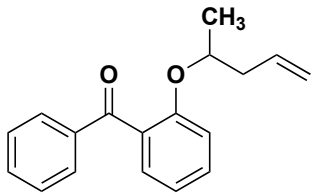

**36**  
<sup>1</sup>H, 600 MHz, CDCl<sub>3</sub>

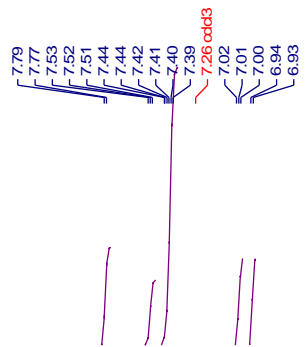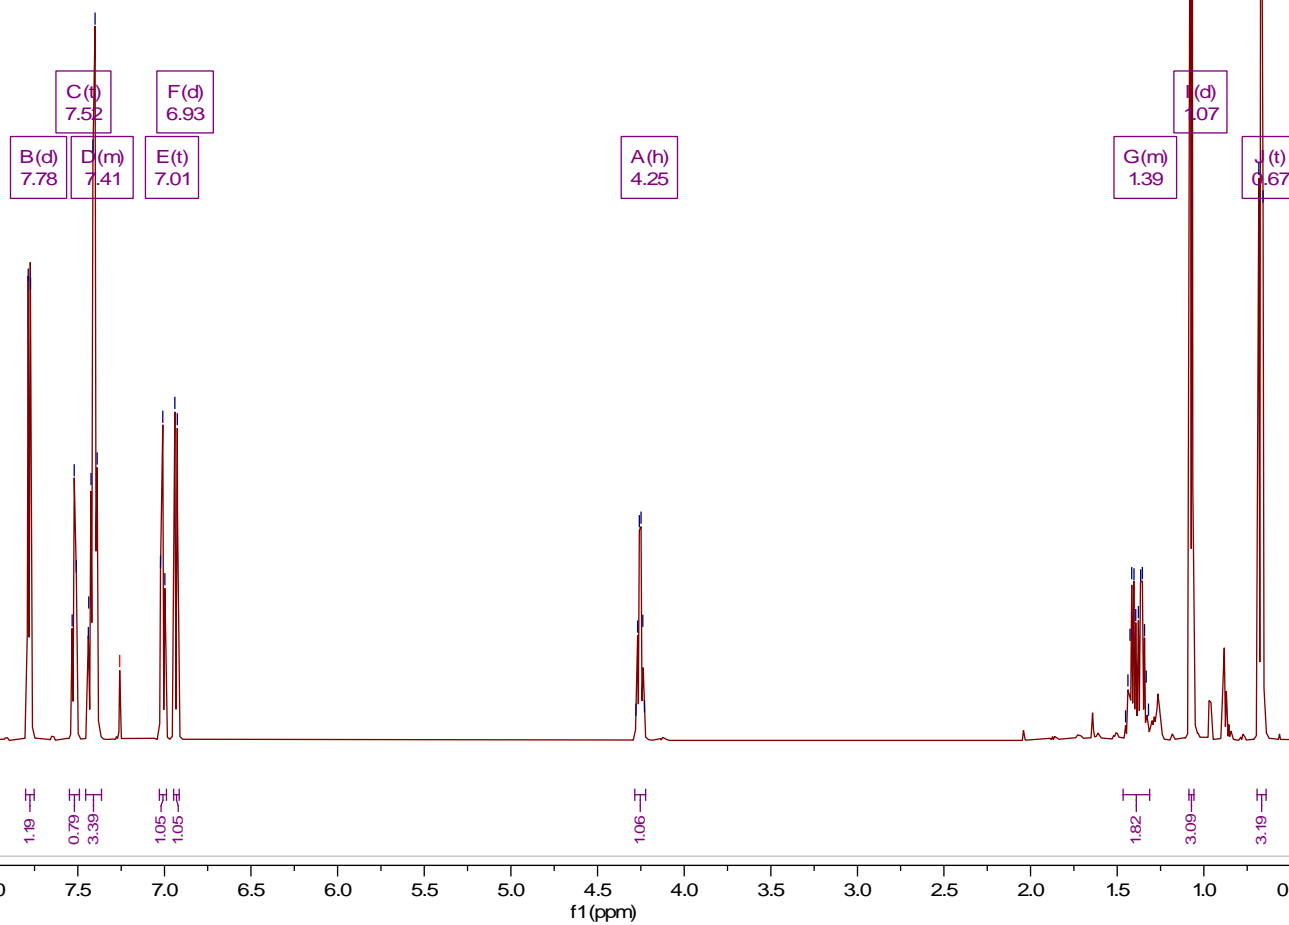

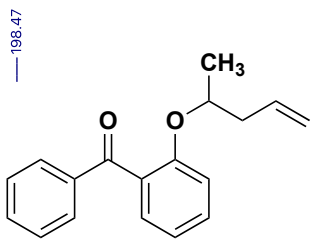

**36**  
**<sup>13</sup>C, 100 MHz, CDCl<sub>3</sub>**

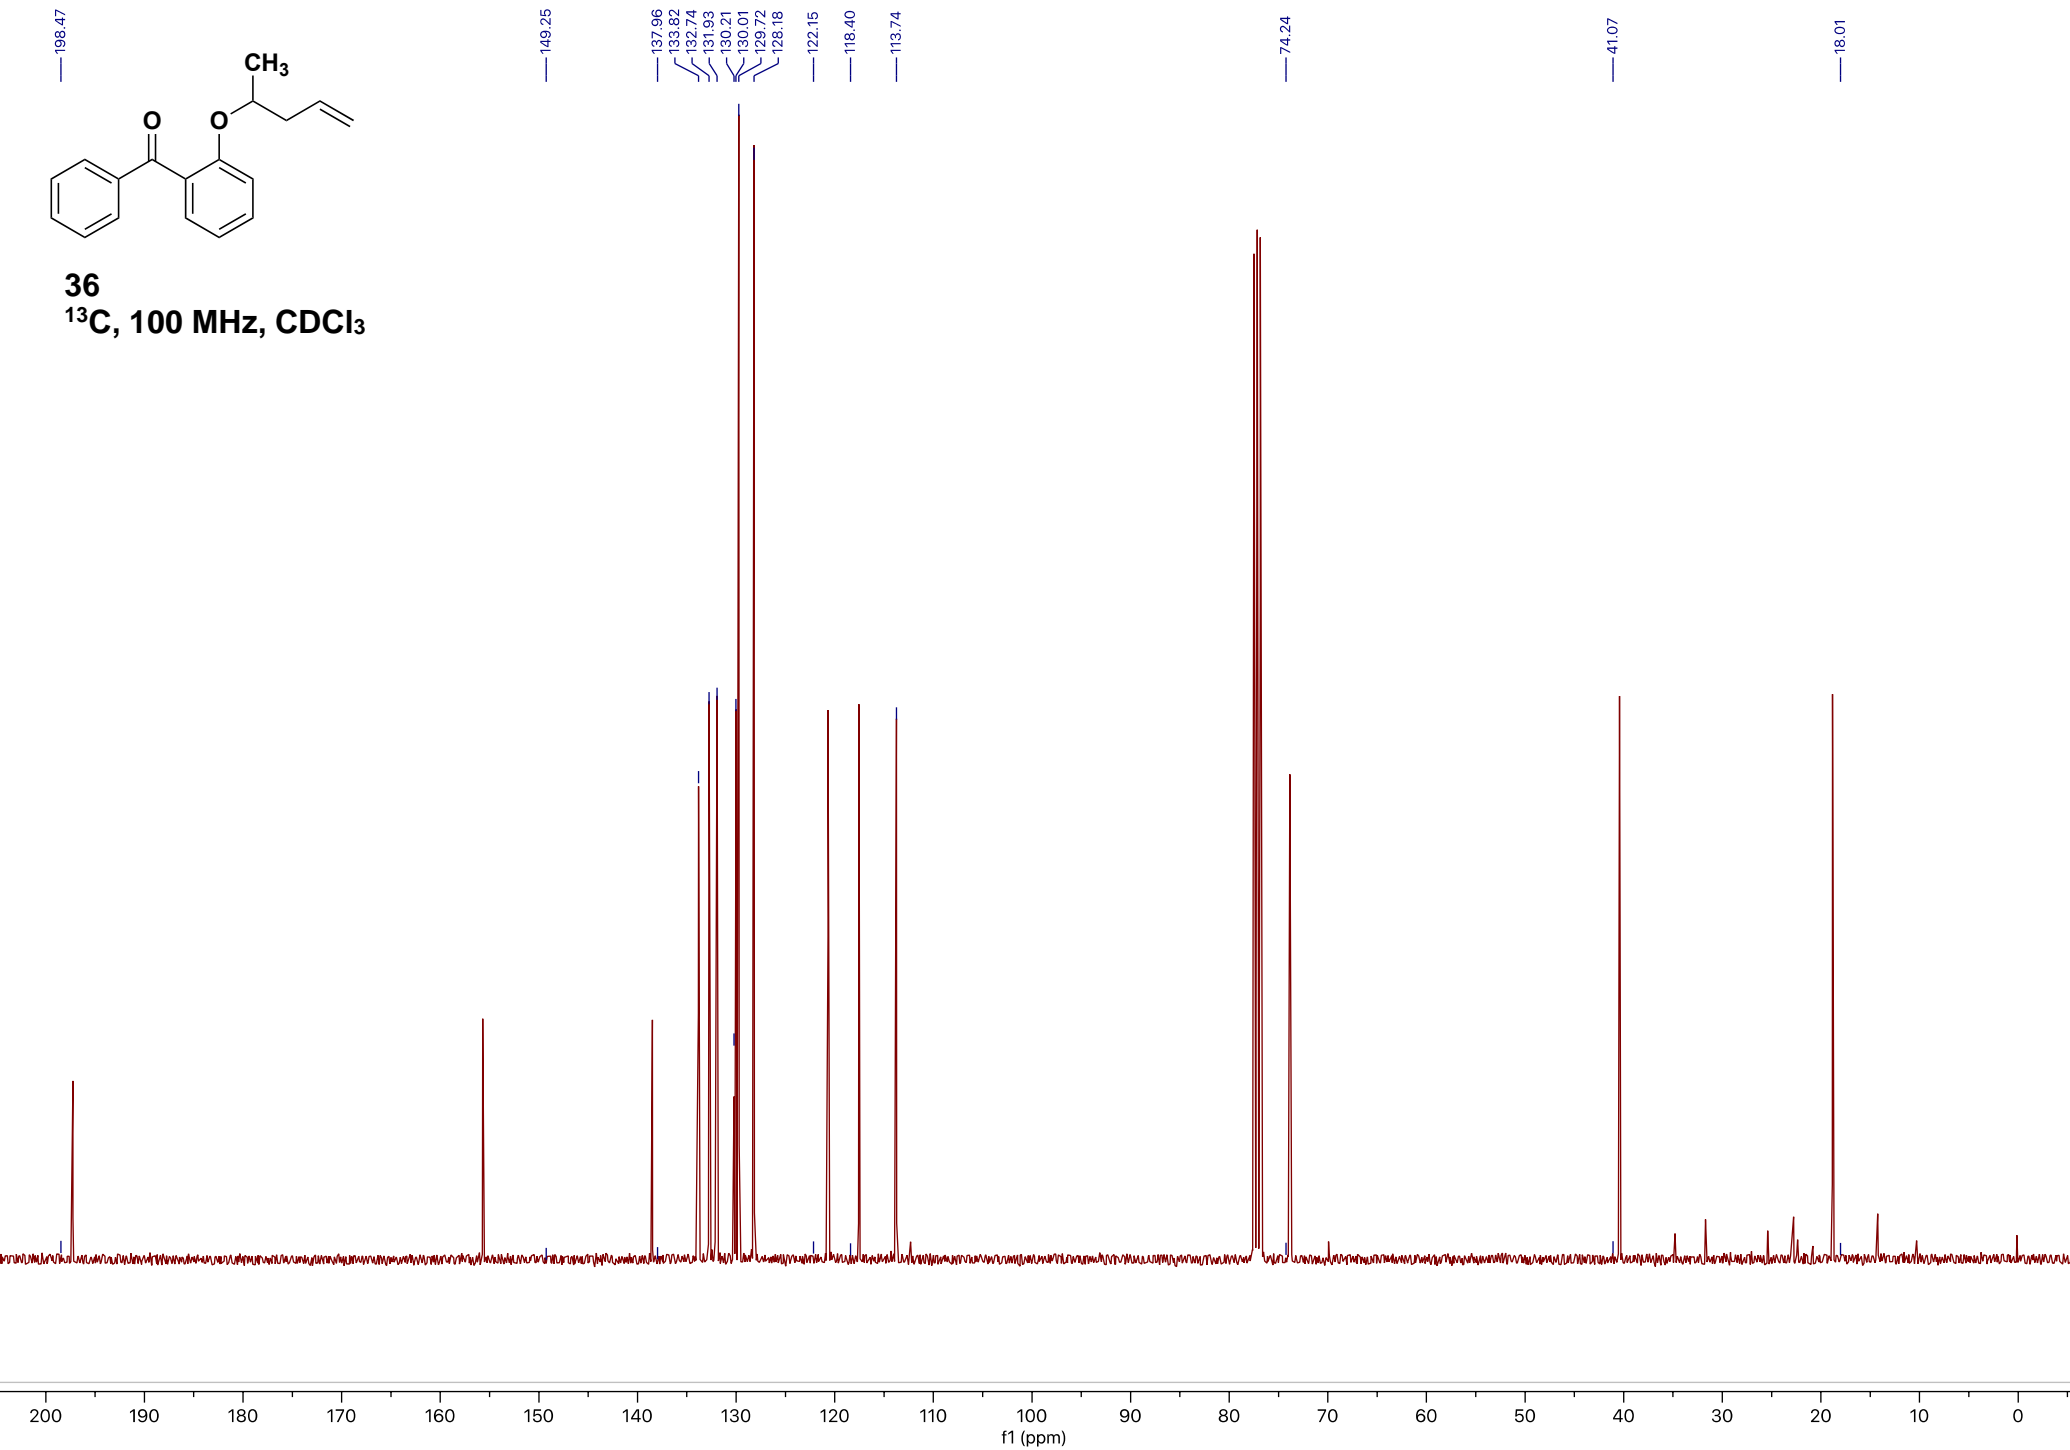

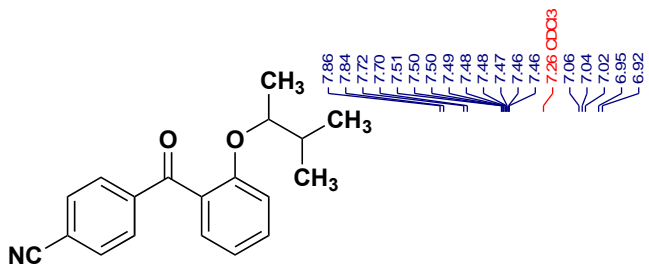

38  
<sup>1</sup>H, 400 MHz, CDCl<sub>3</sub>

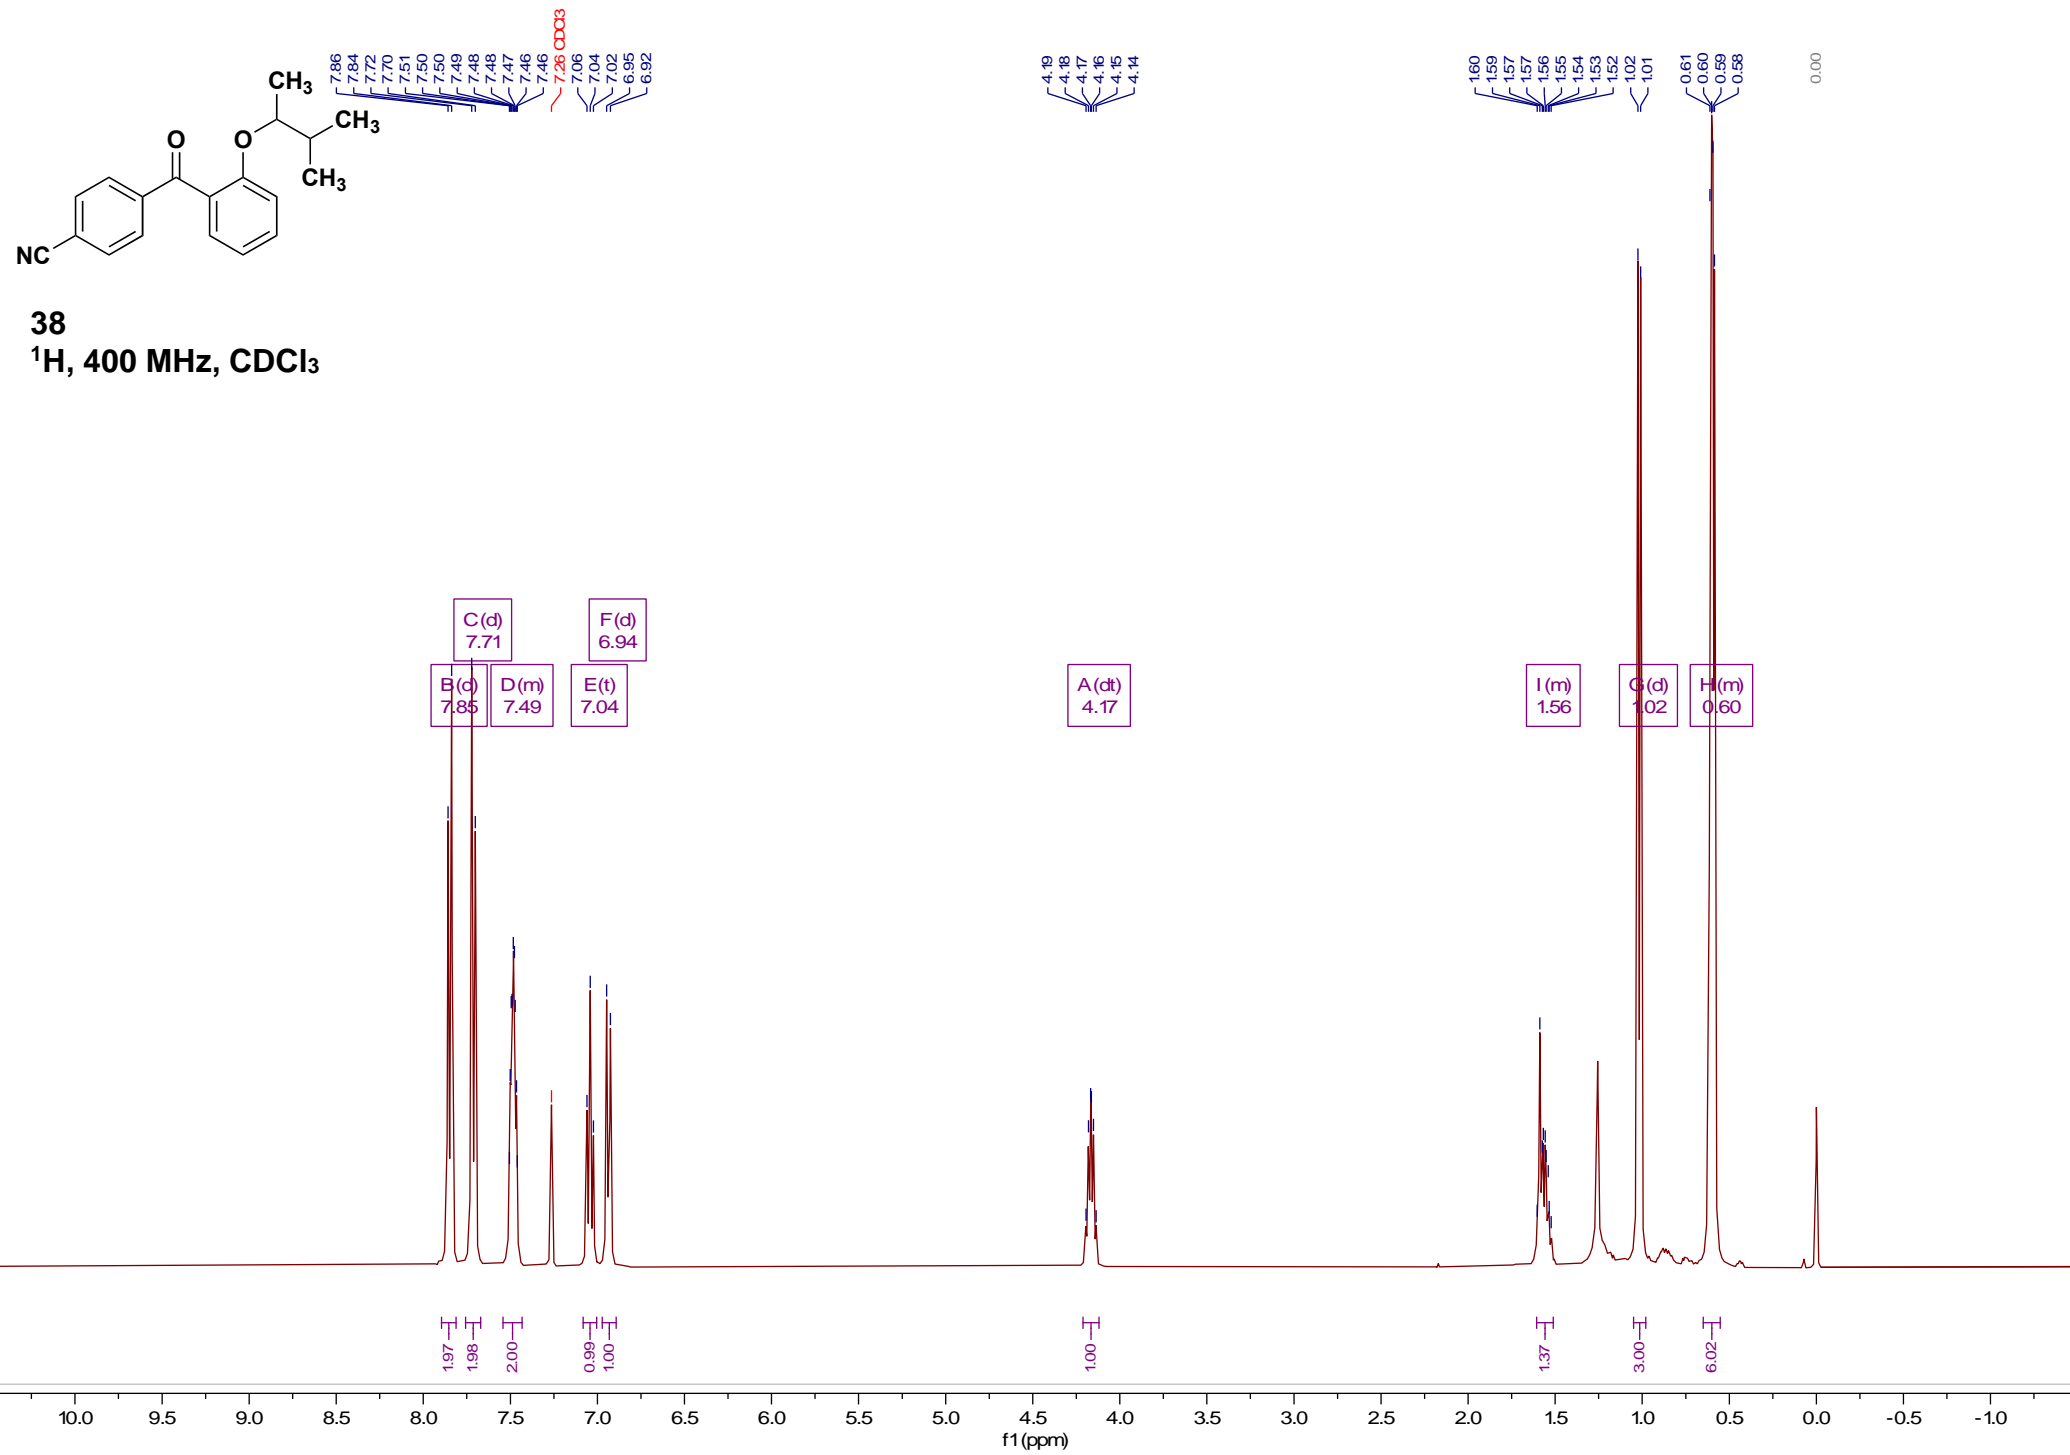

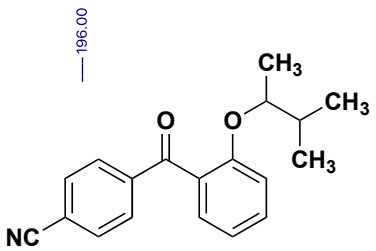

**38**  
<sup>13</sup>C, 100 MHz, CDCl<sub>3</sub>

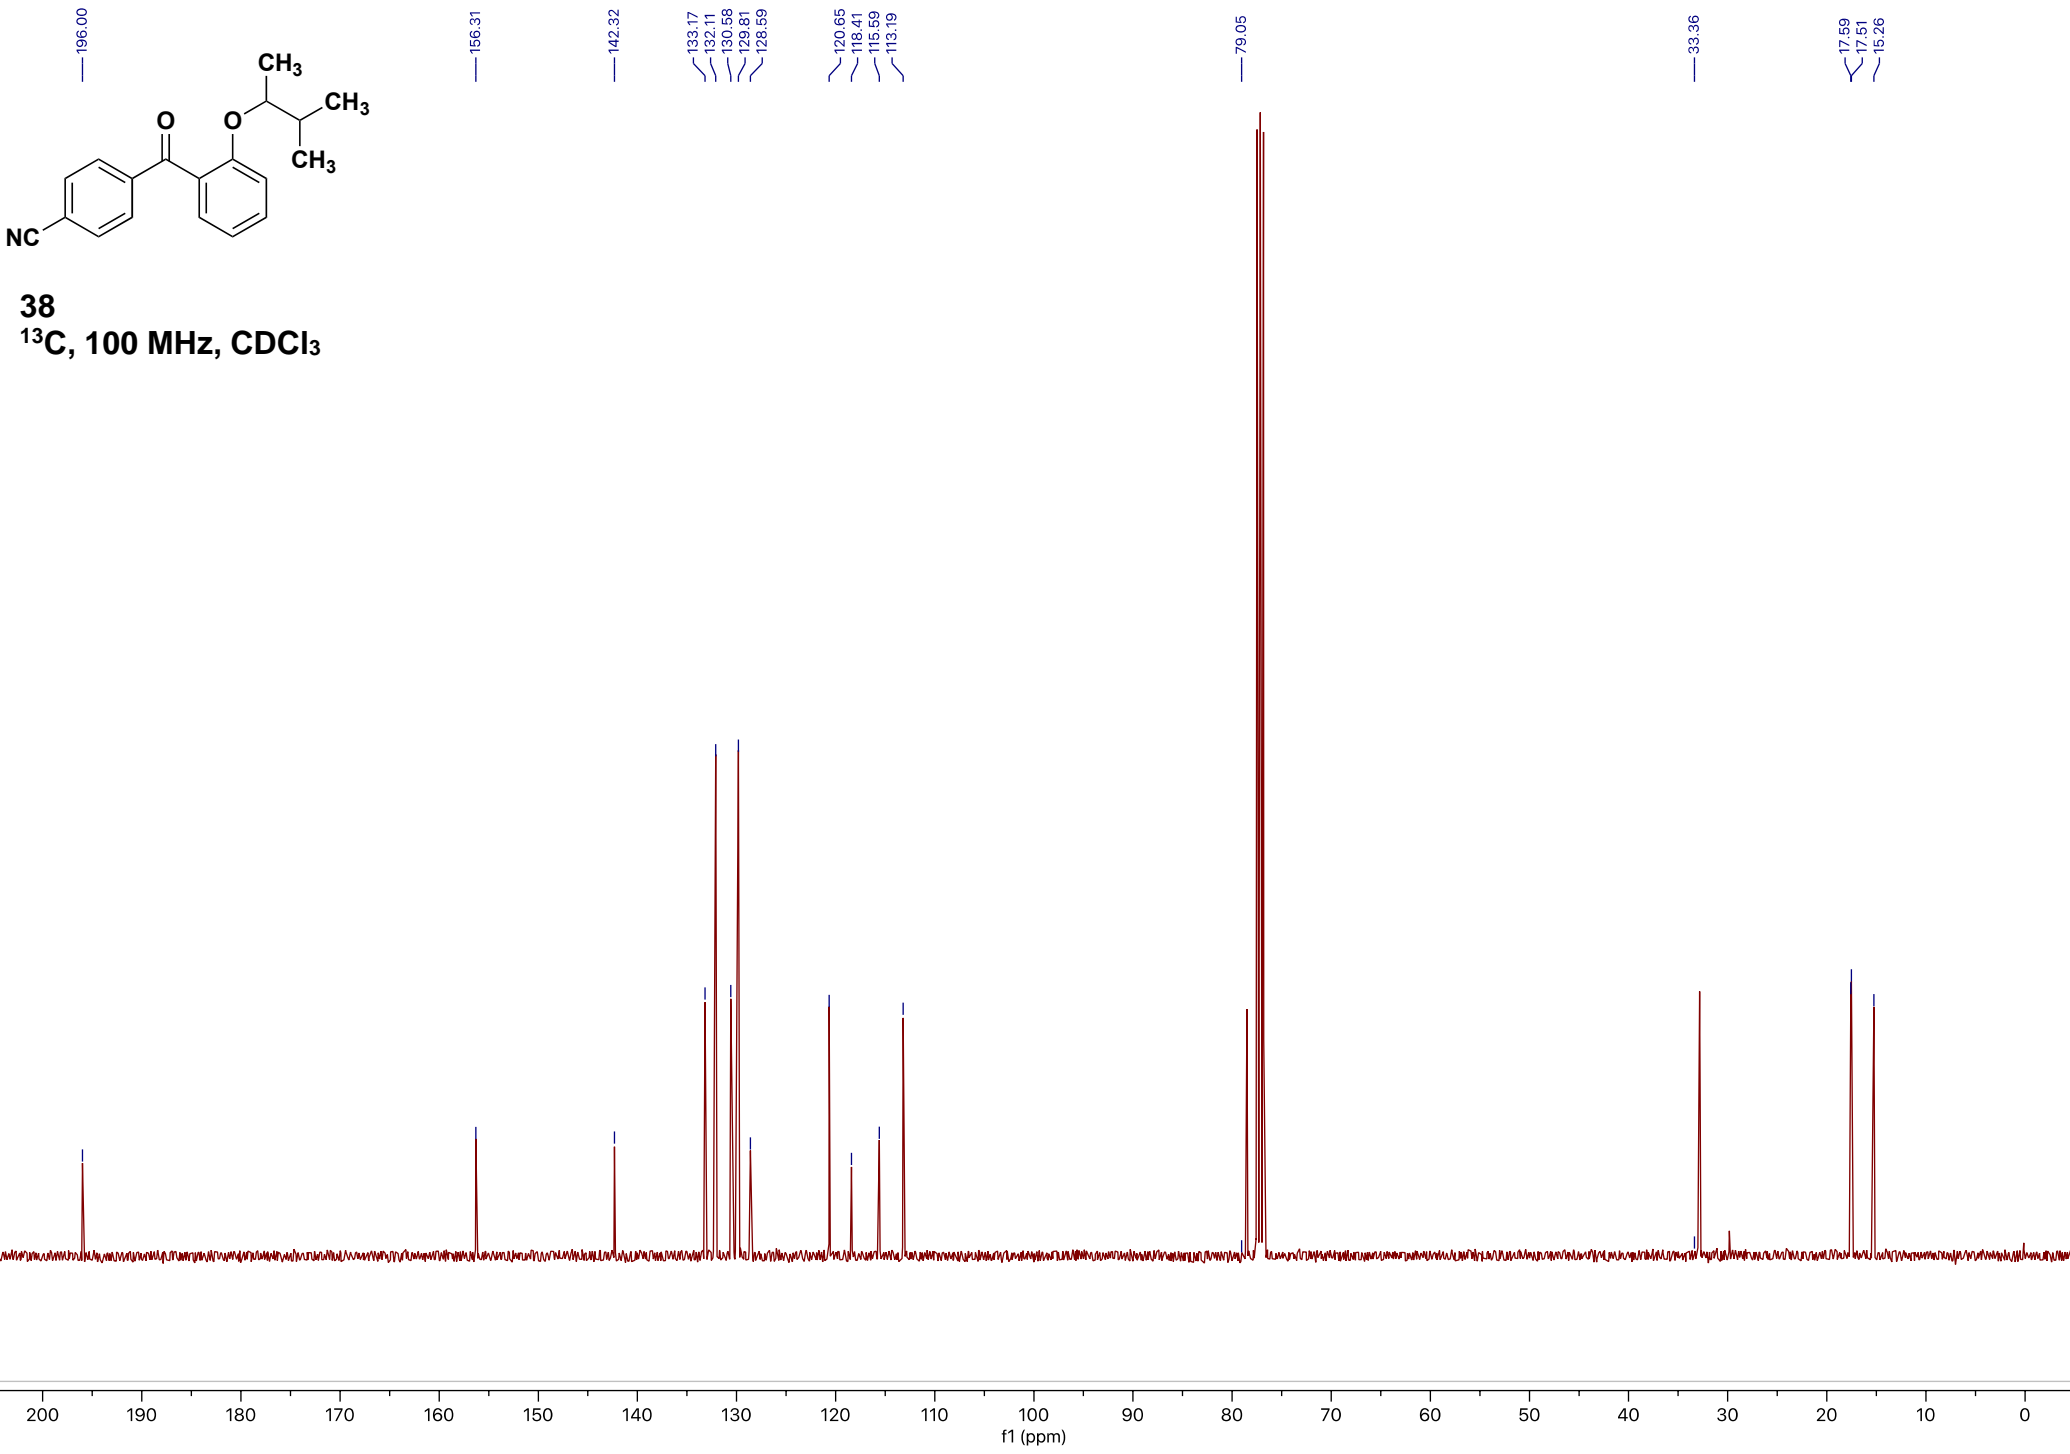

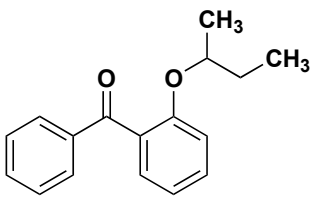

**37**  
<sup>1</sup>H, 400 MHz, CDCl<sub>3</sub>

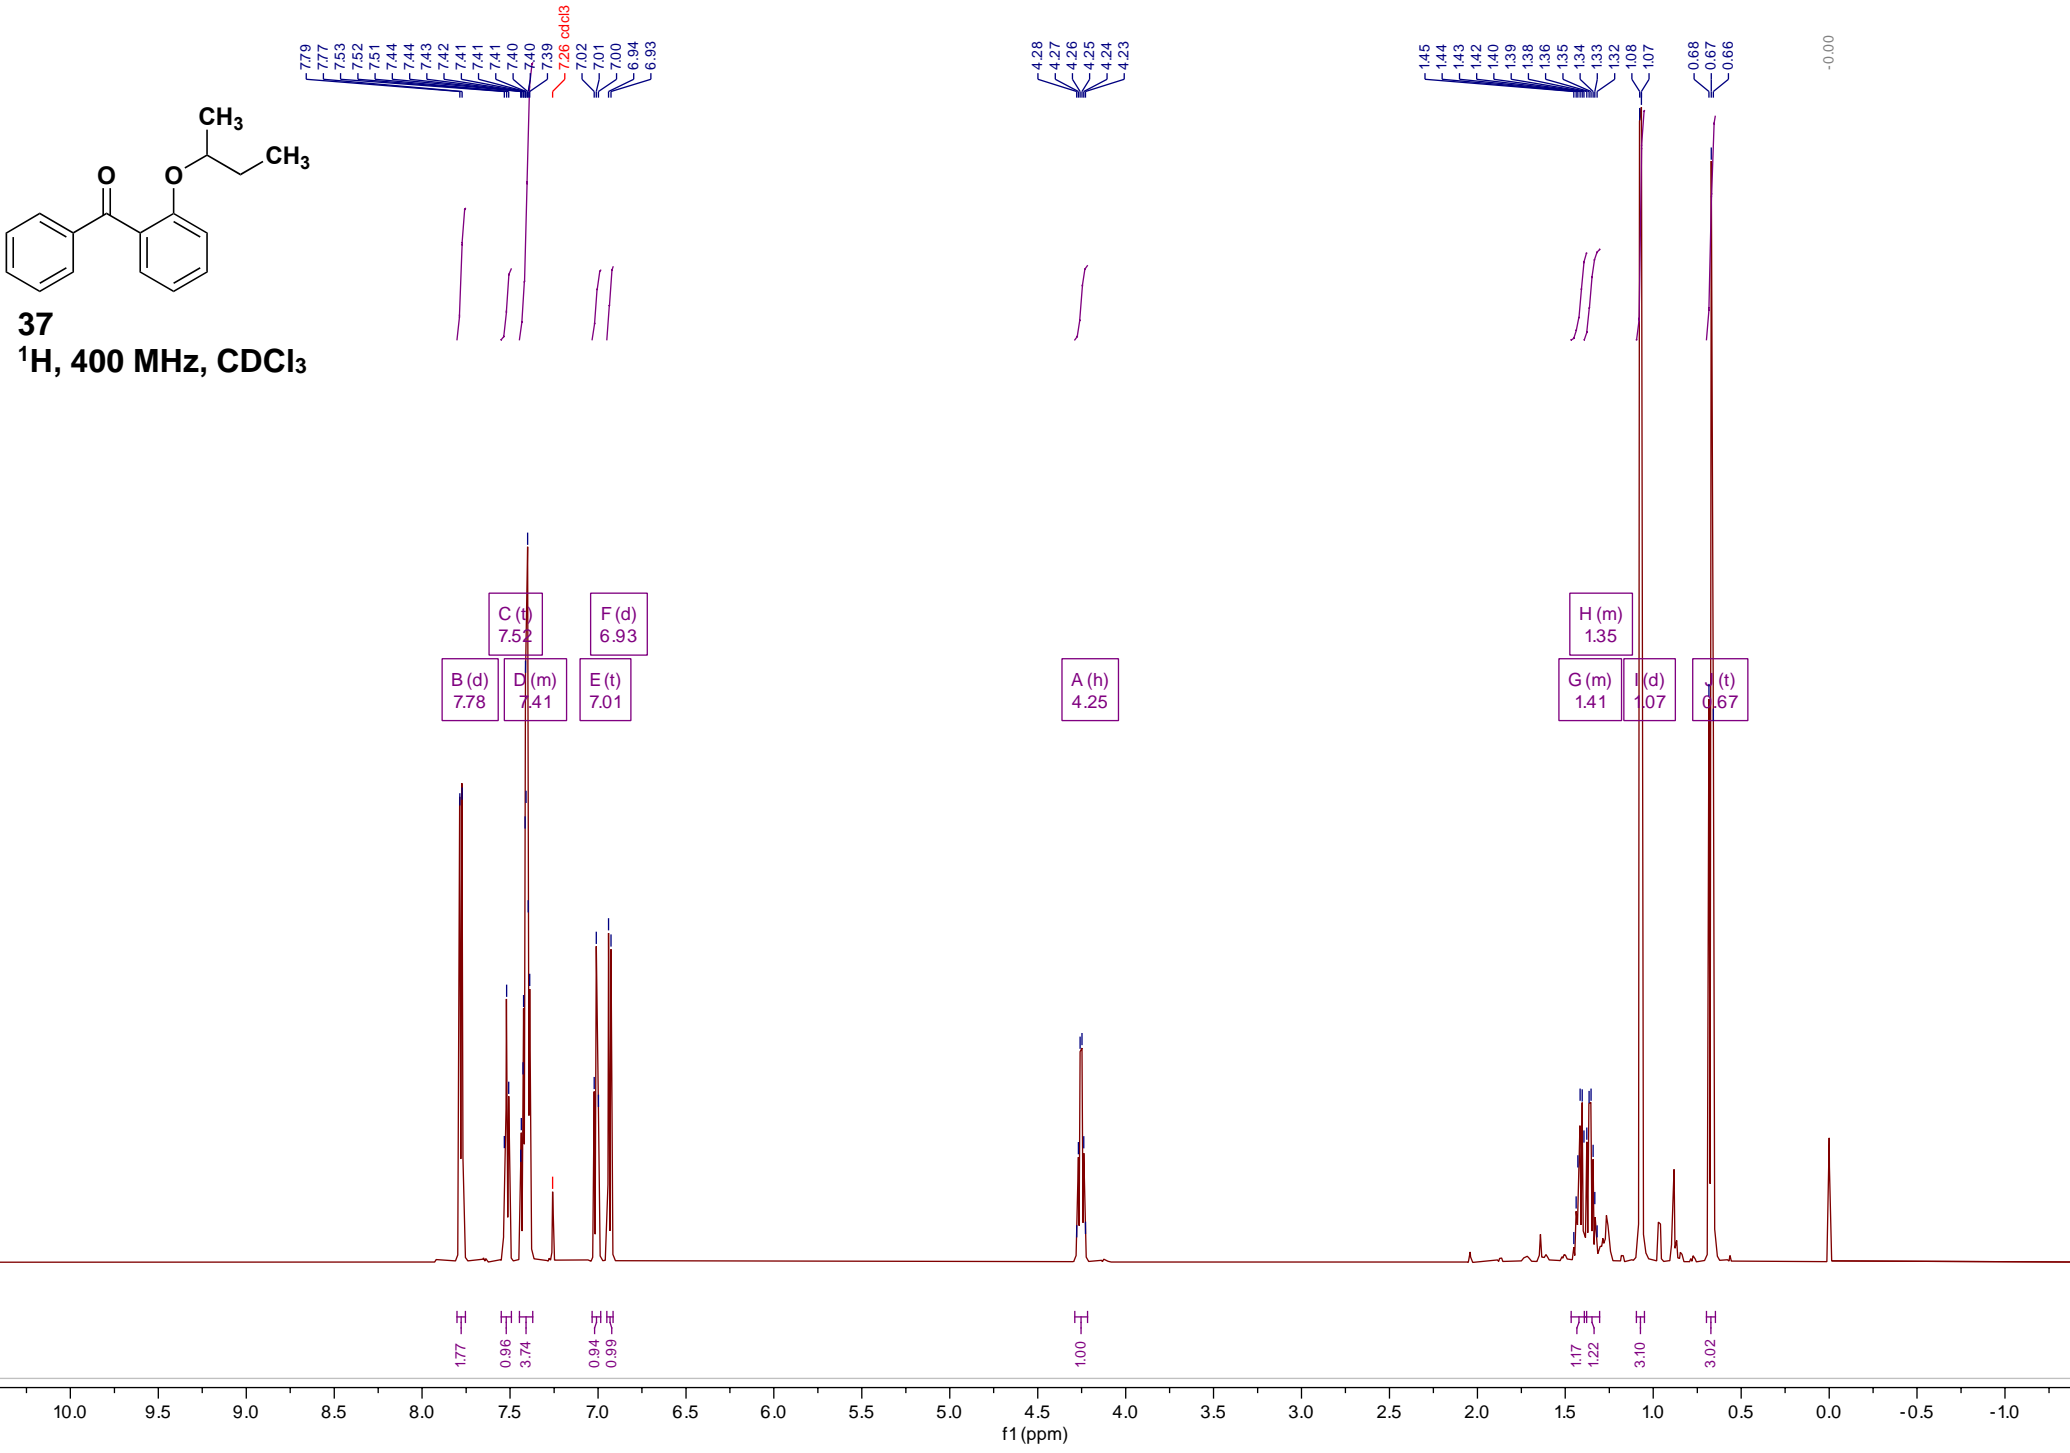

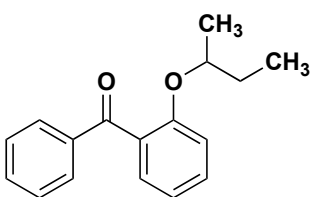

**37**  
<sup>13</sup>C, 100 MHz, CDCl<sub>3</sub>

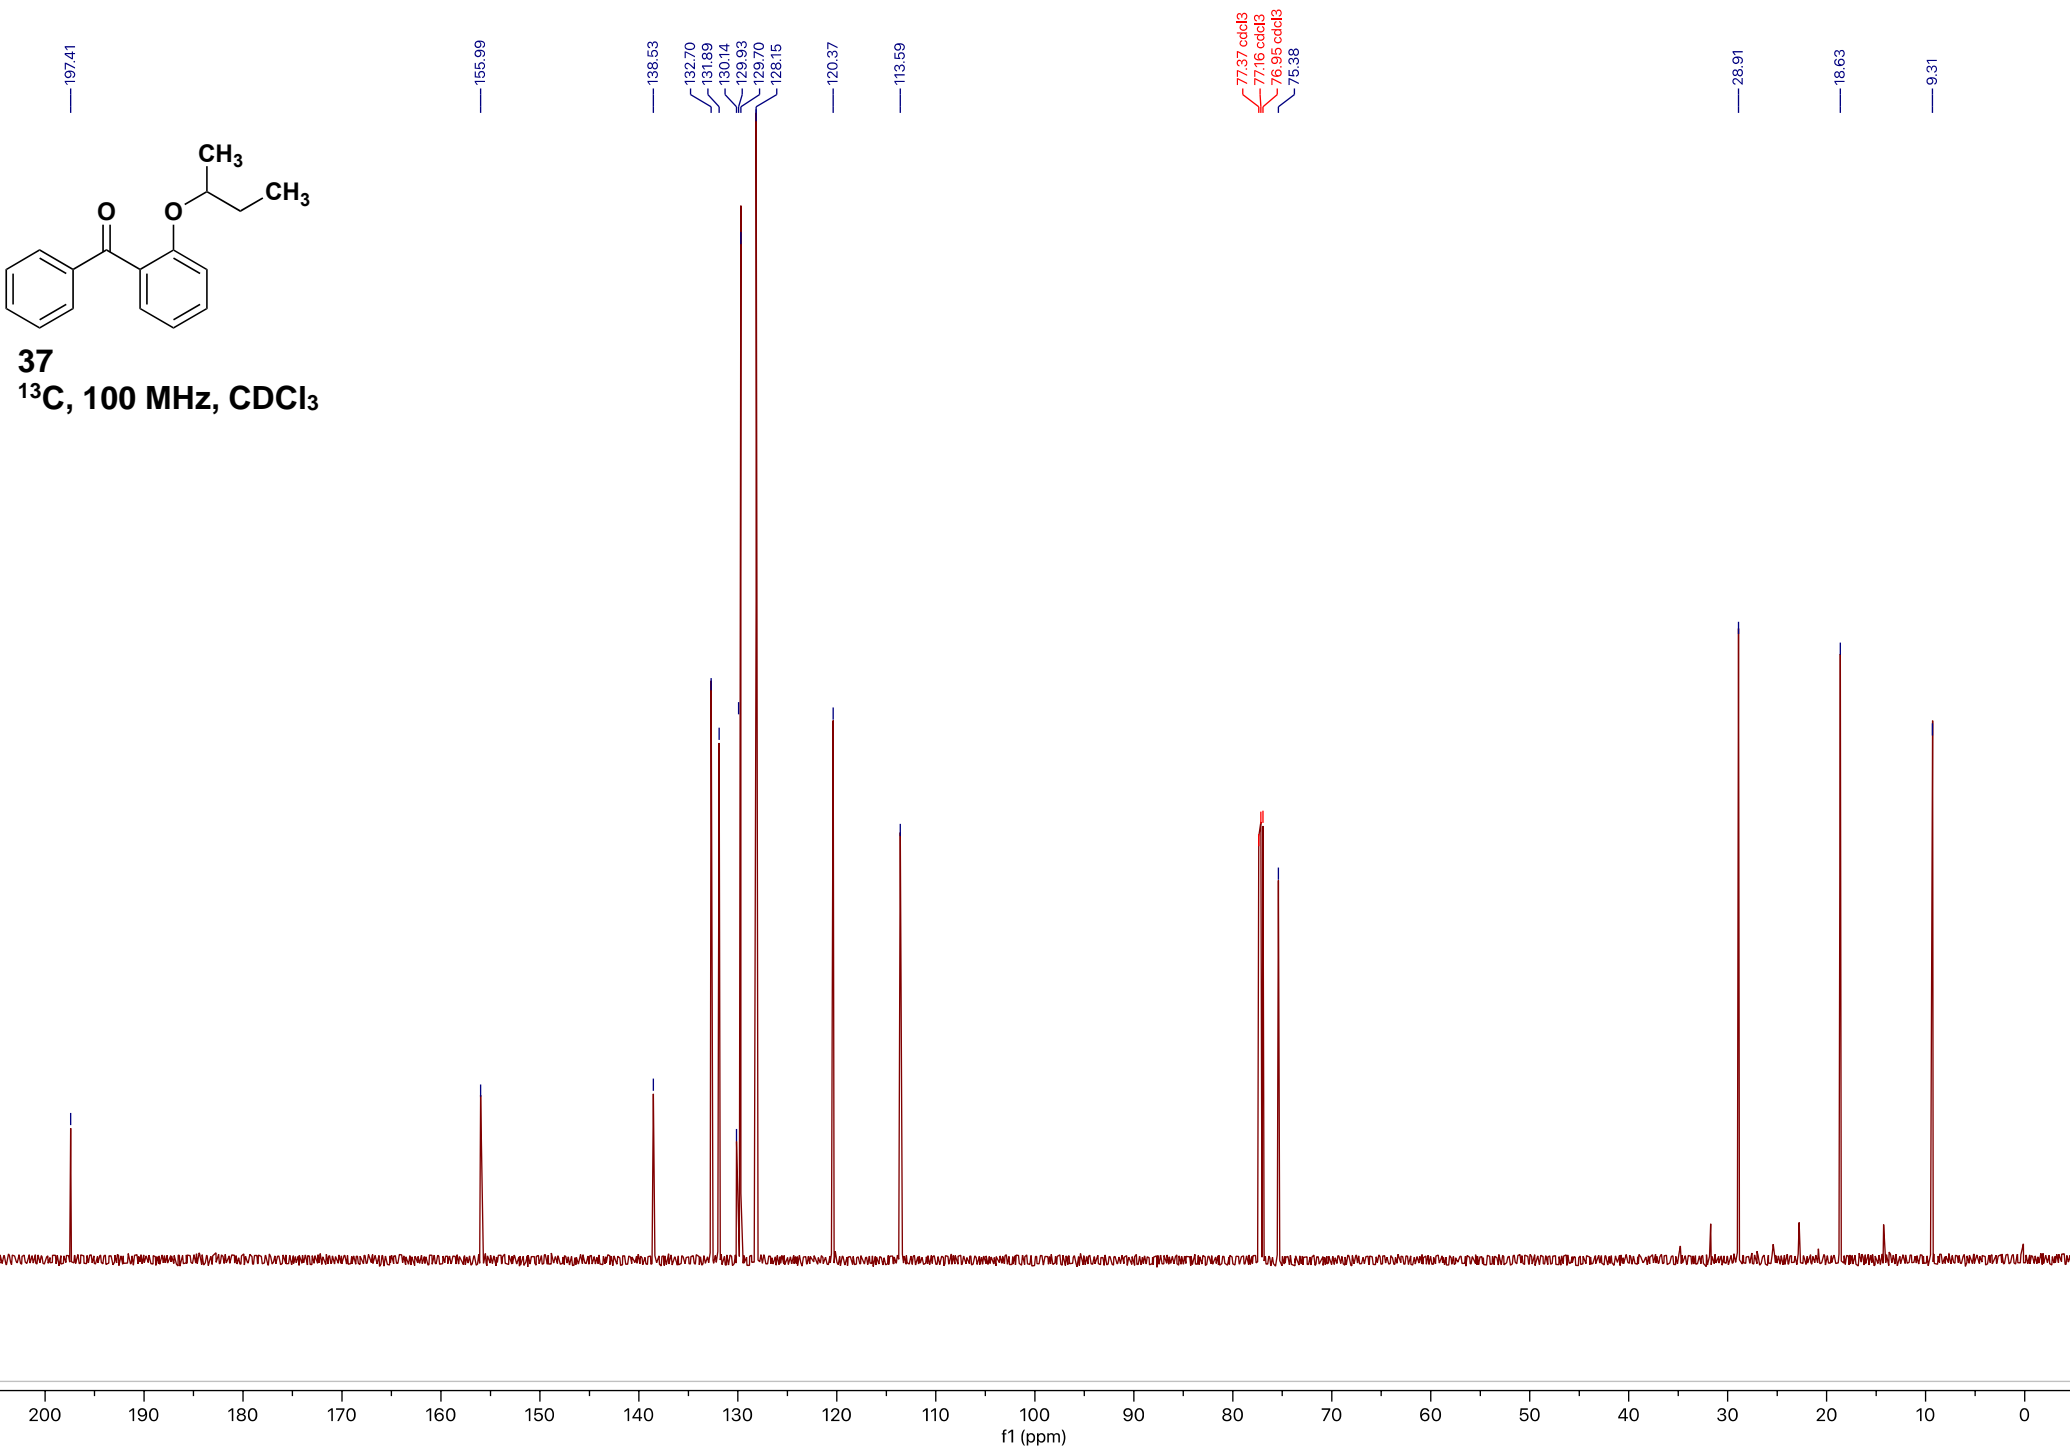



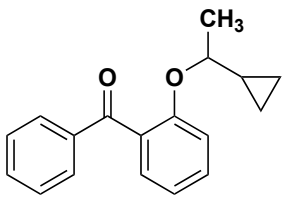

**39**  
<sup>1</sup>H, 600 MHz, CDCl<sub>3</sub>

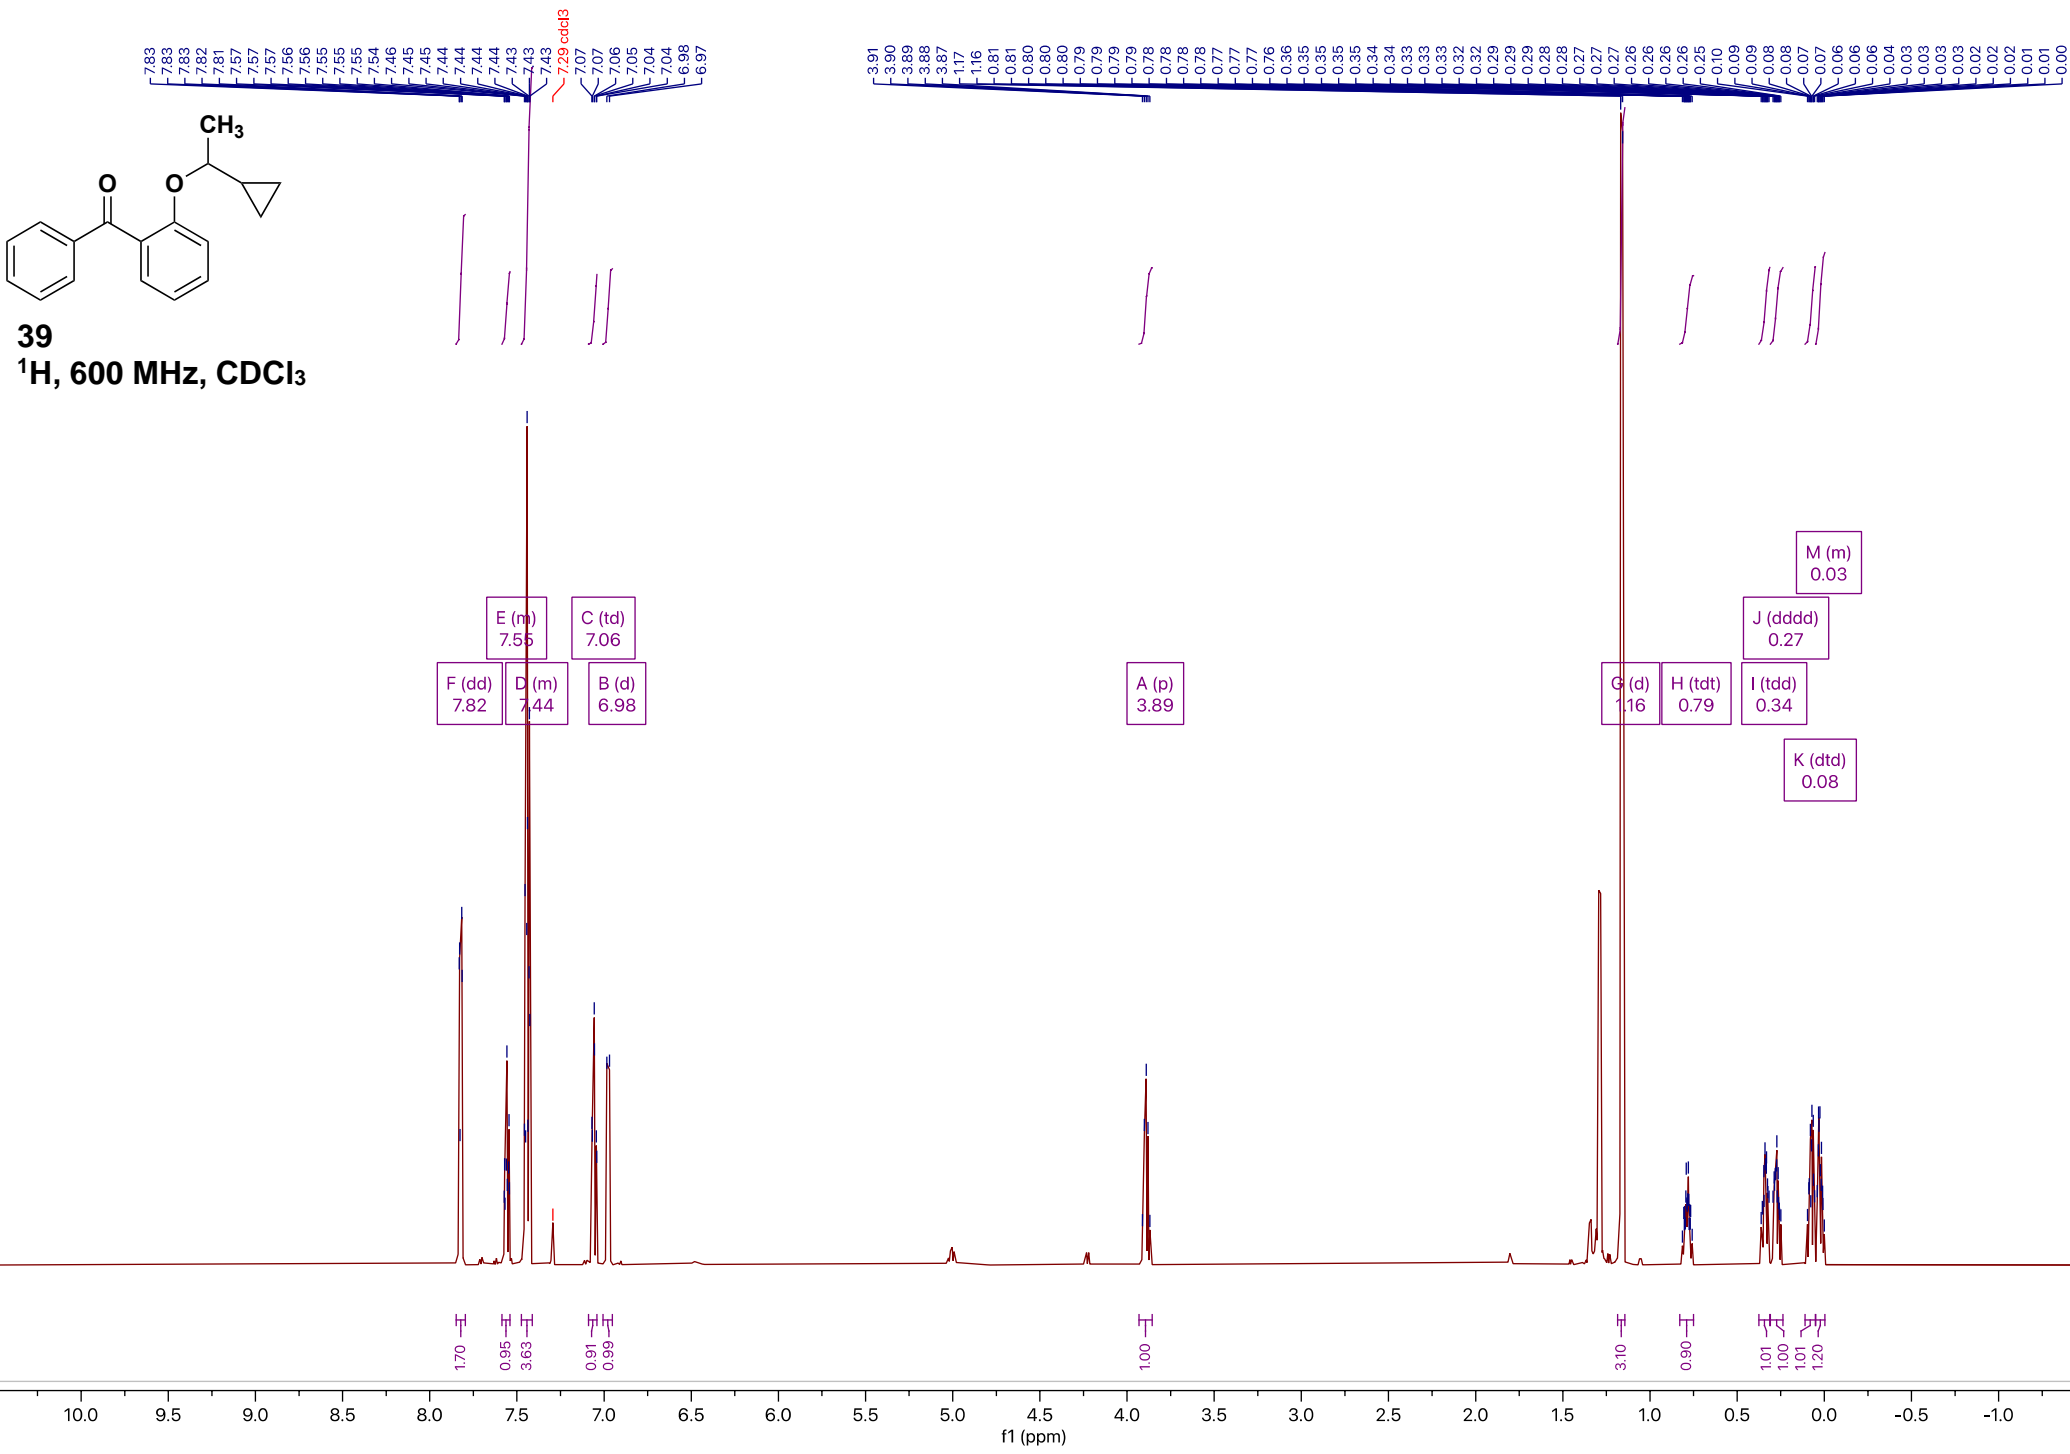

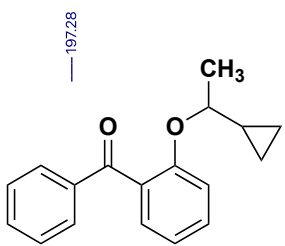

**39**  
<sup>13</sup>C, 150 MHz, CDCl<sub>3</sub>

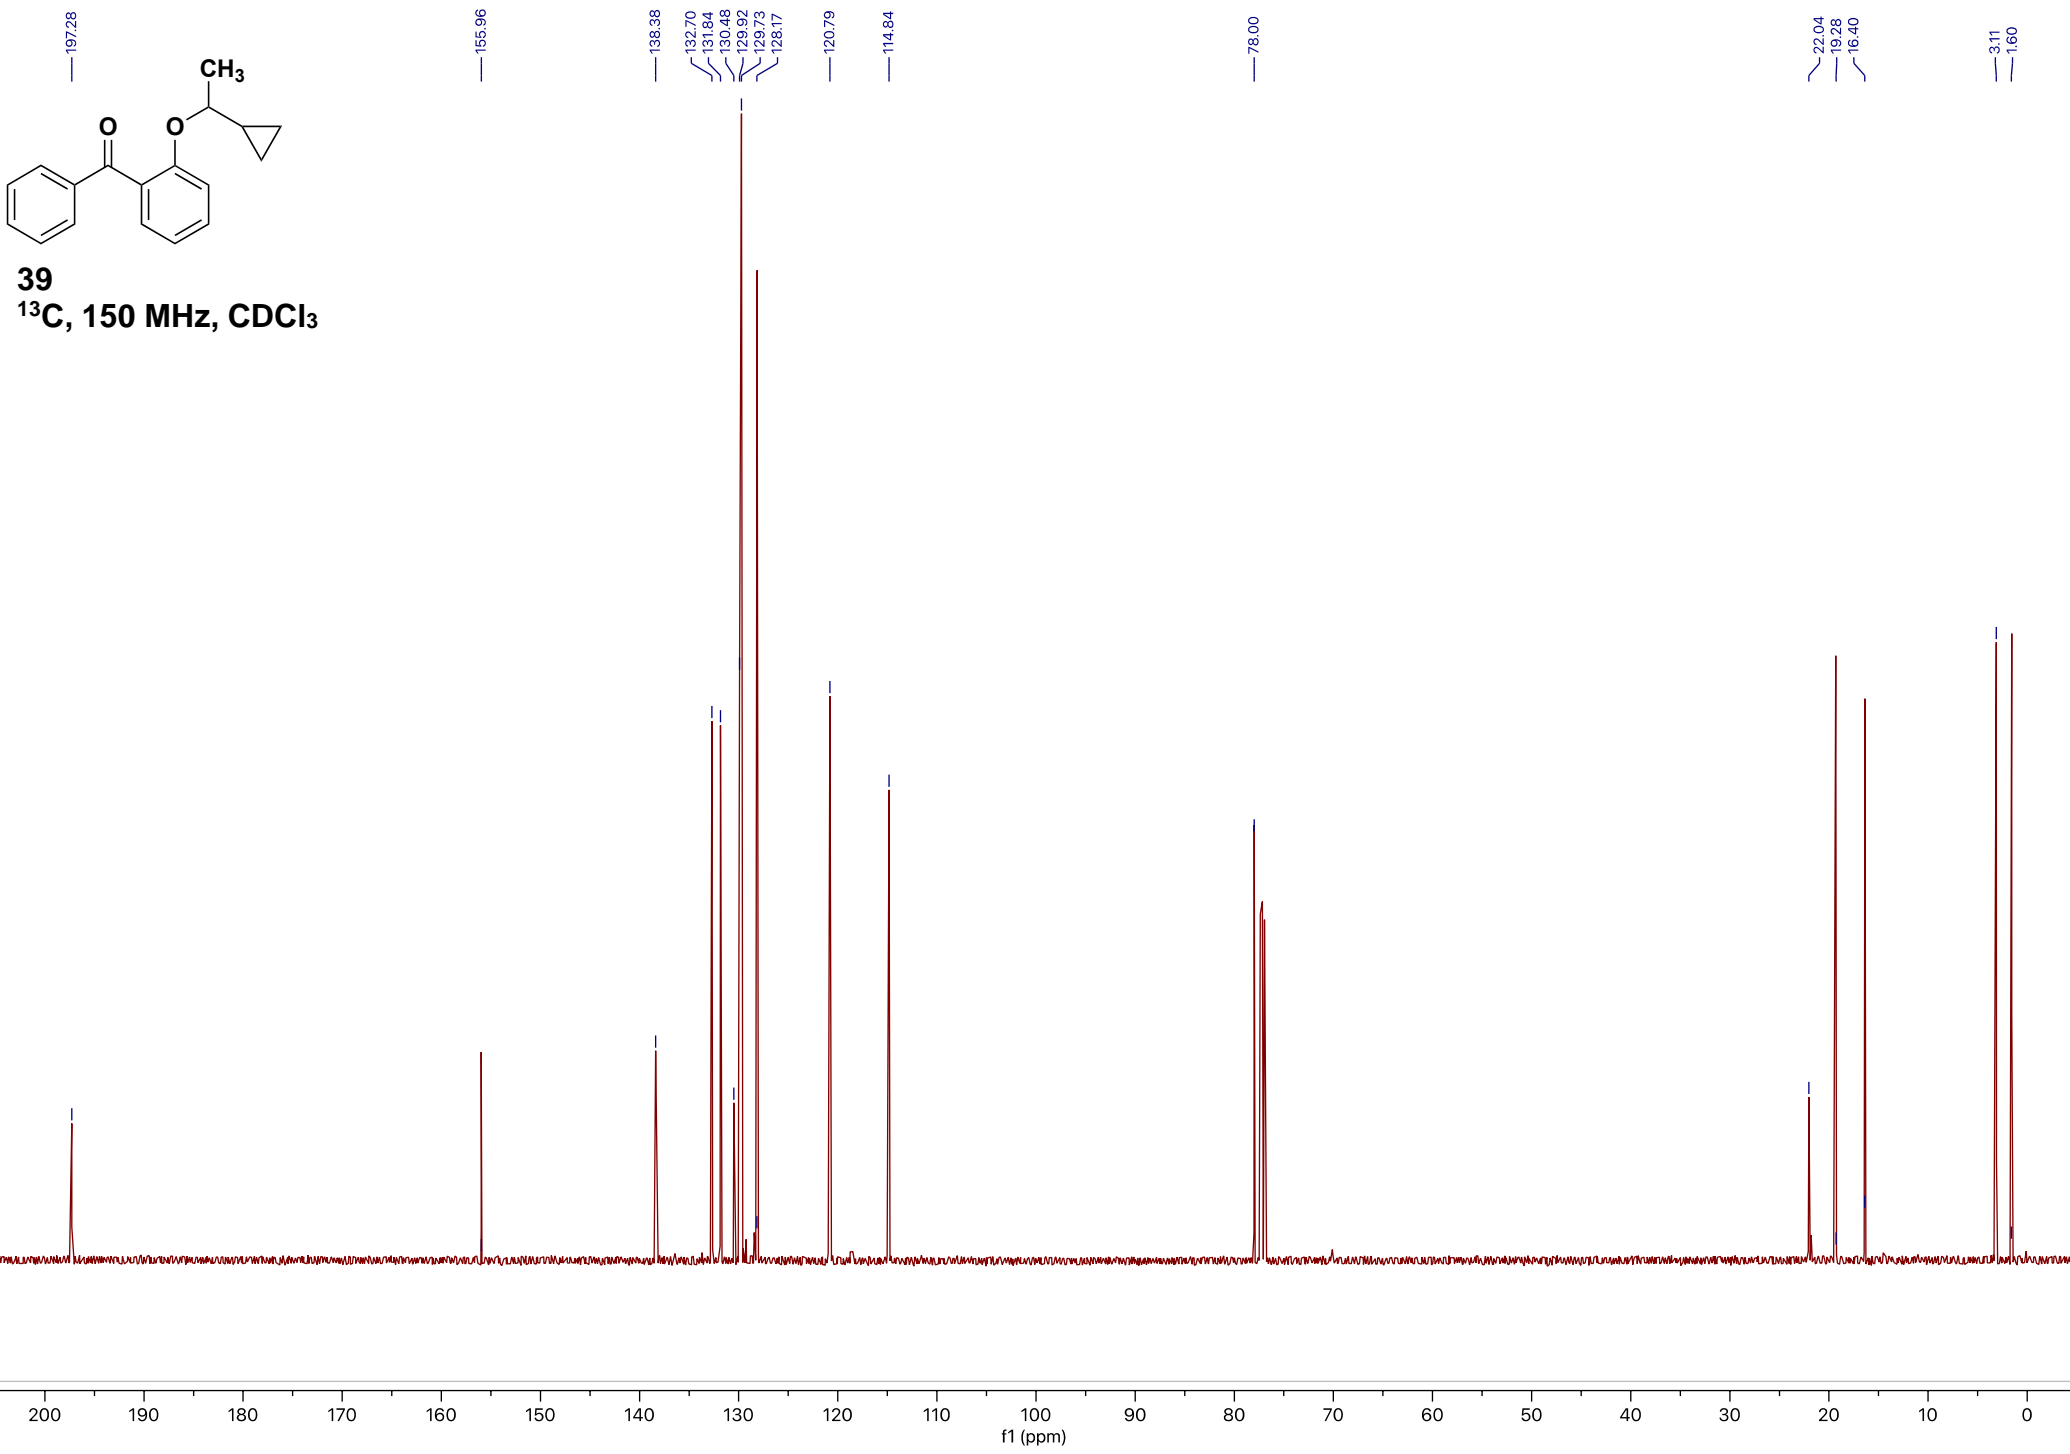

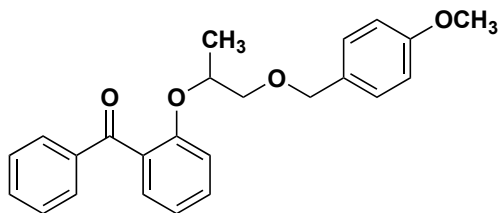

**40**  
<sup>1</sup>H, 400 MHz, CDCl<sub>3</sub>

7.79  
7.77  
7.52  
7.51  
7.49  
7.44  
7.43  
7.42  
7.41  
7.40  
7.39  
7.38  
7.36  
7.24 CDCl<sub>3</sub>  
7.12  
7.10  
7.04  
7.03  
7.02  
7.01  
7.00  
6.84  
6.81  
4.53  
4.51  
4.50  
4.48  
4.47  
4.45  
4.30  
4.27  
4.27  
4.24  
3.78  
3.75  
3.73  
3.34  
3.33  
3.32  
3.30  
3.25  
3.24  
3.23  
3.21

— 1.76 H<sub>2</sub>O

1.10  
1.09

0.00

H (t) 7.51  
J (d) 7.11  
G (d) 7.78  
I (tt) 7.40  
K (m) 7.01  
L (d) 6.82  
A (h) 4.49  
B (d) 4.27  
C (s) 3.78  
D (dd) 3.32  
E (dd) 3.23  
F (d) 1.09

1.92  
1.00  
3.90  
1.96  
1.98  
2.04

1.00  
1.94  
3.00  
0.98  
1.00

2.90

10.0 9.5 9.0 8.5 8.0 7.5 7.0 6.5 6.0 5.5 5.0 4.5 4.0 3.5 3.0 2.5 2.0 1.5 1.0 0.5 0.0 -0.5 -1.0

f1 (ppm)

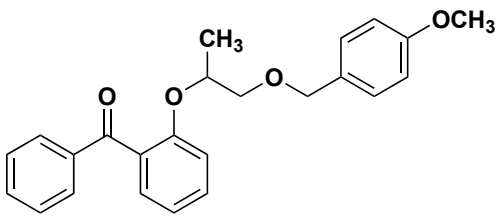

40  
<sup>13</sup>C, 100 MHz, CDCl<sub>3</sub>

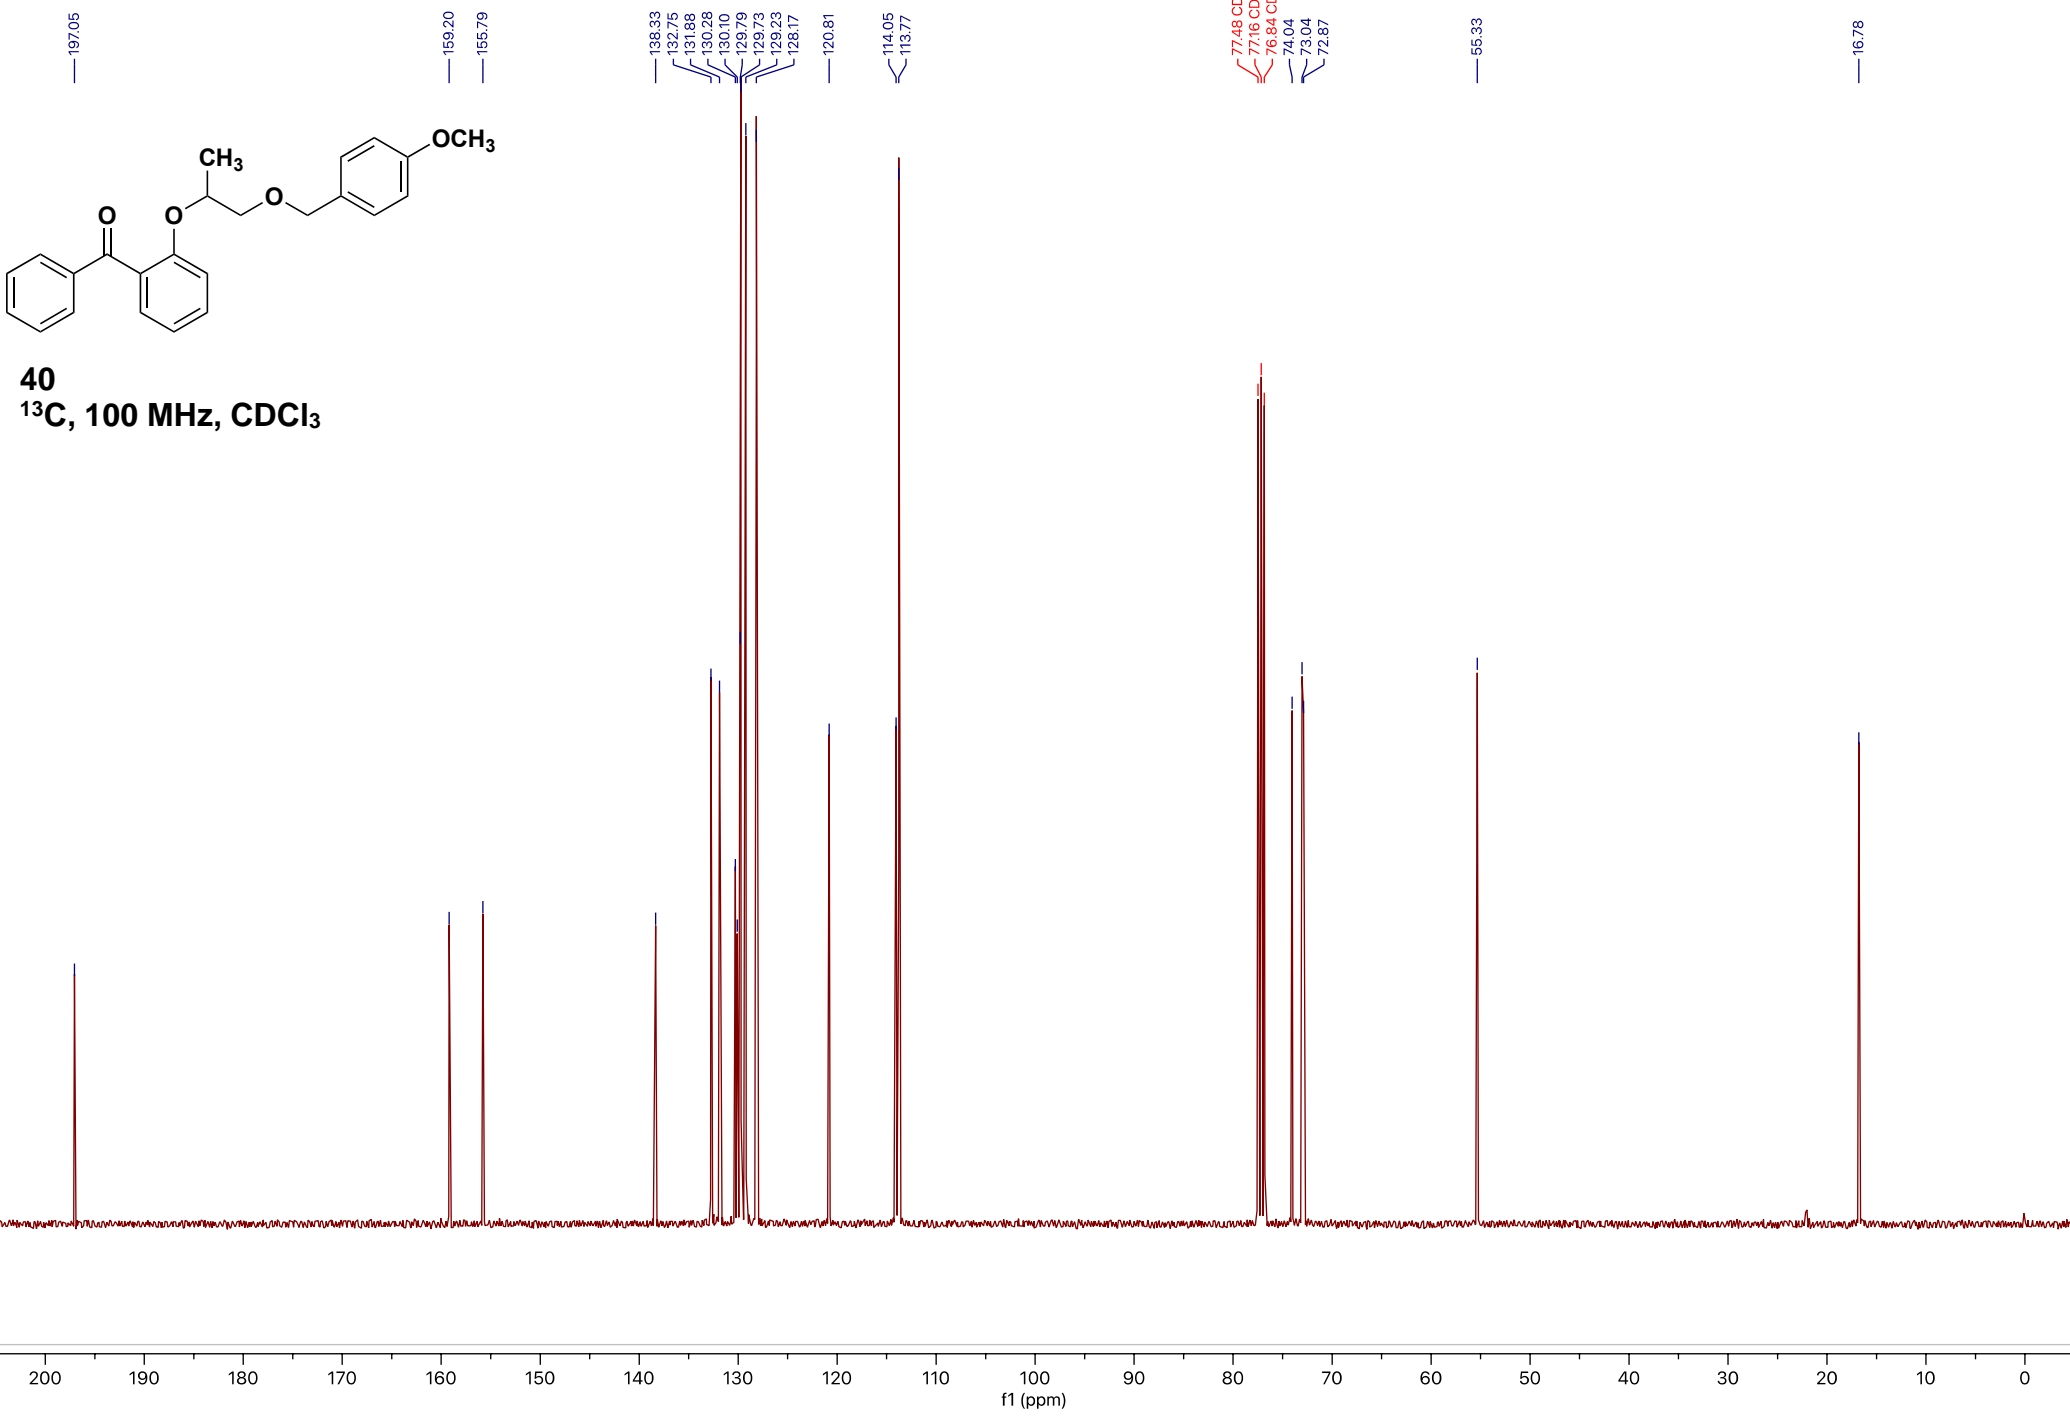

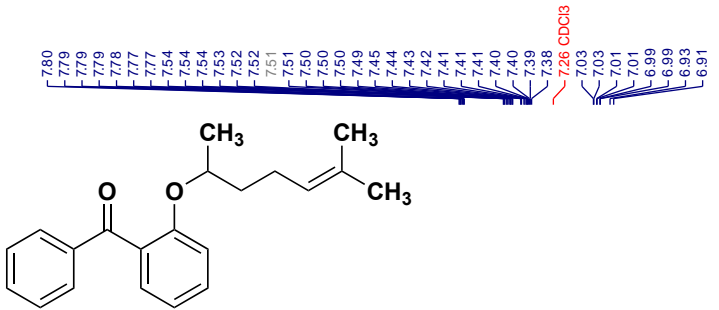

**41**  
<sup>1</sup>H, 400 MHz, CDCl<sub>3</sub>

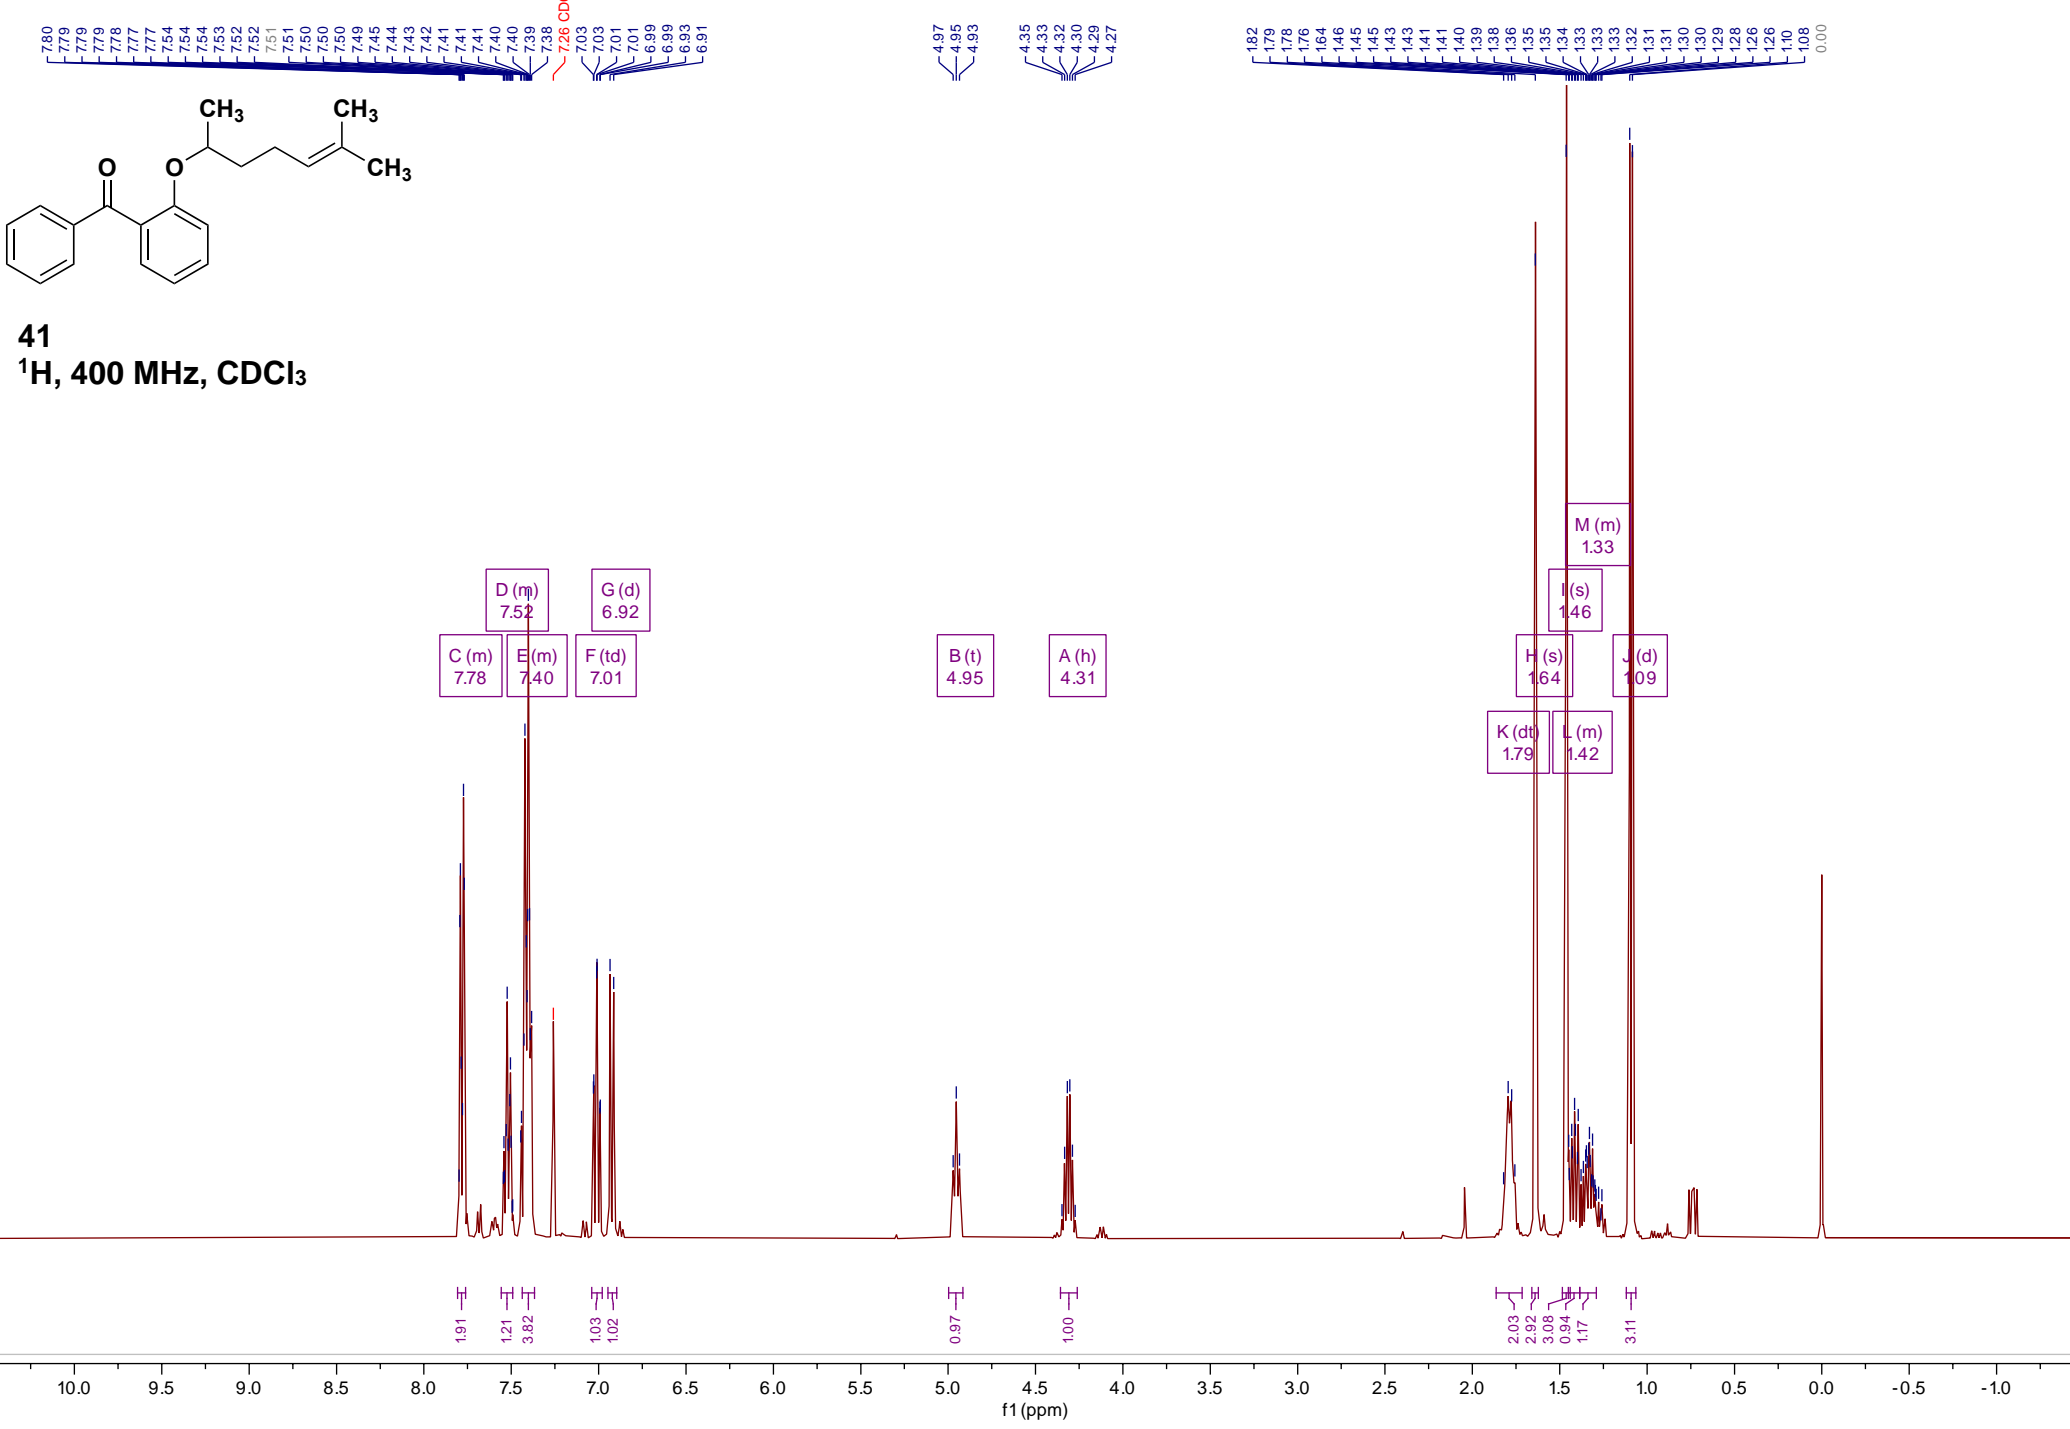

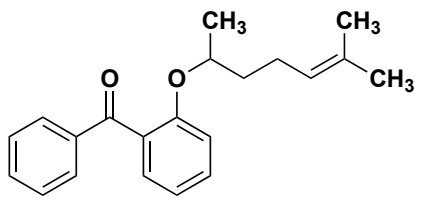

41  
<sup>13</sup>C, 100 MHz, CDCl<sub>3</sub>

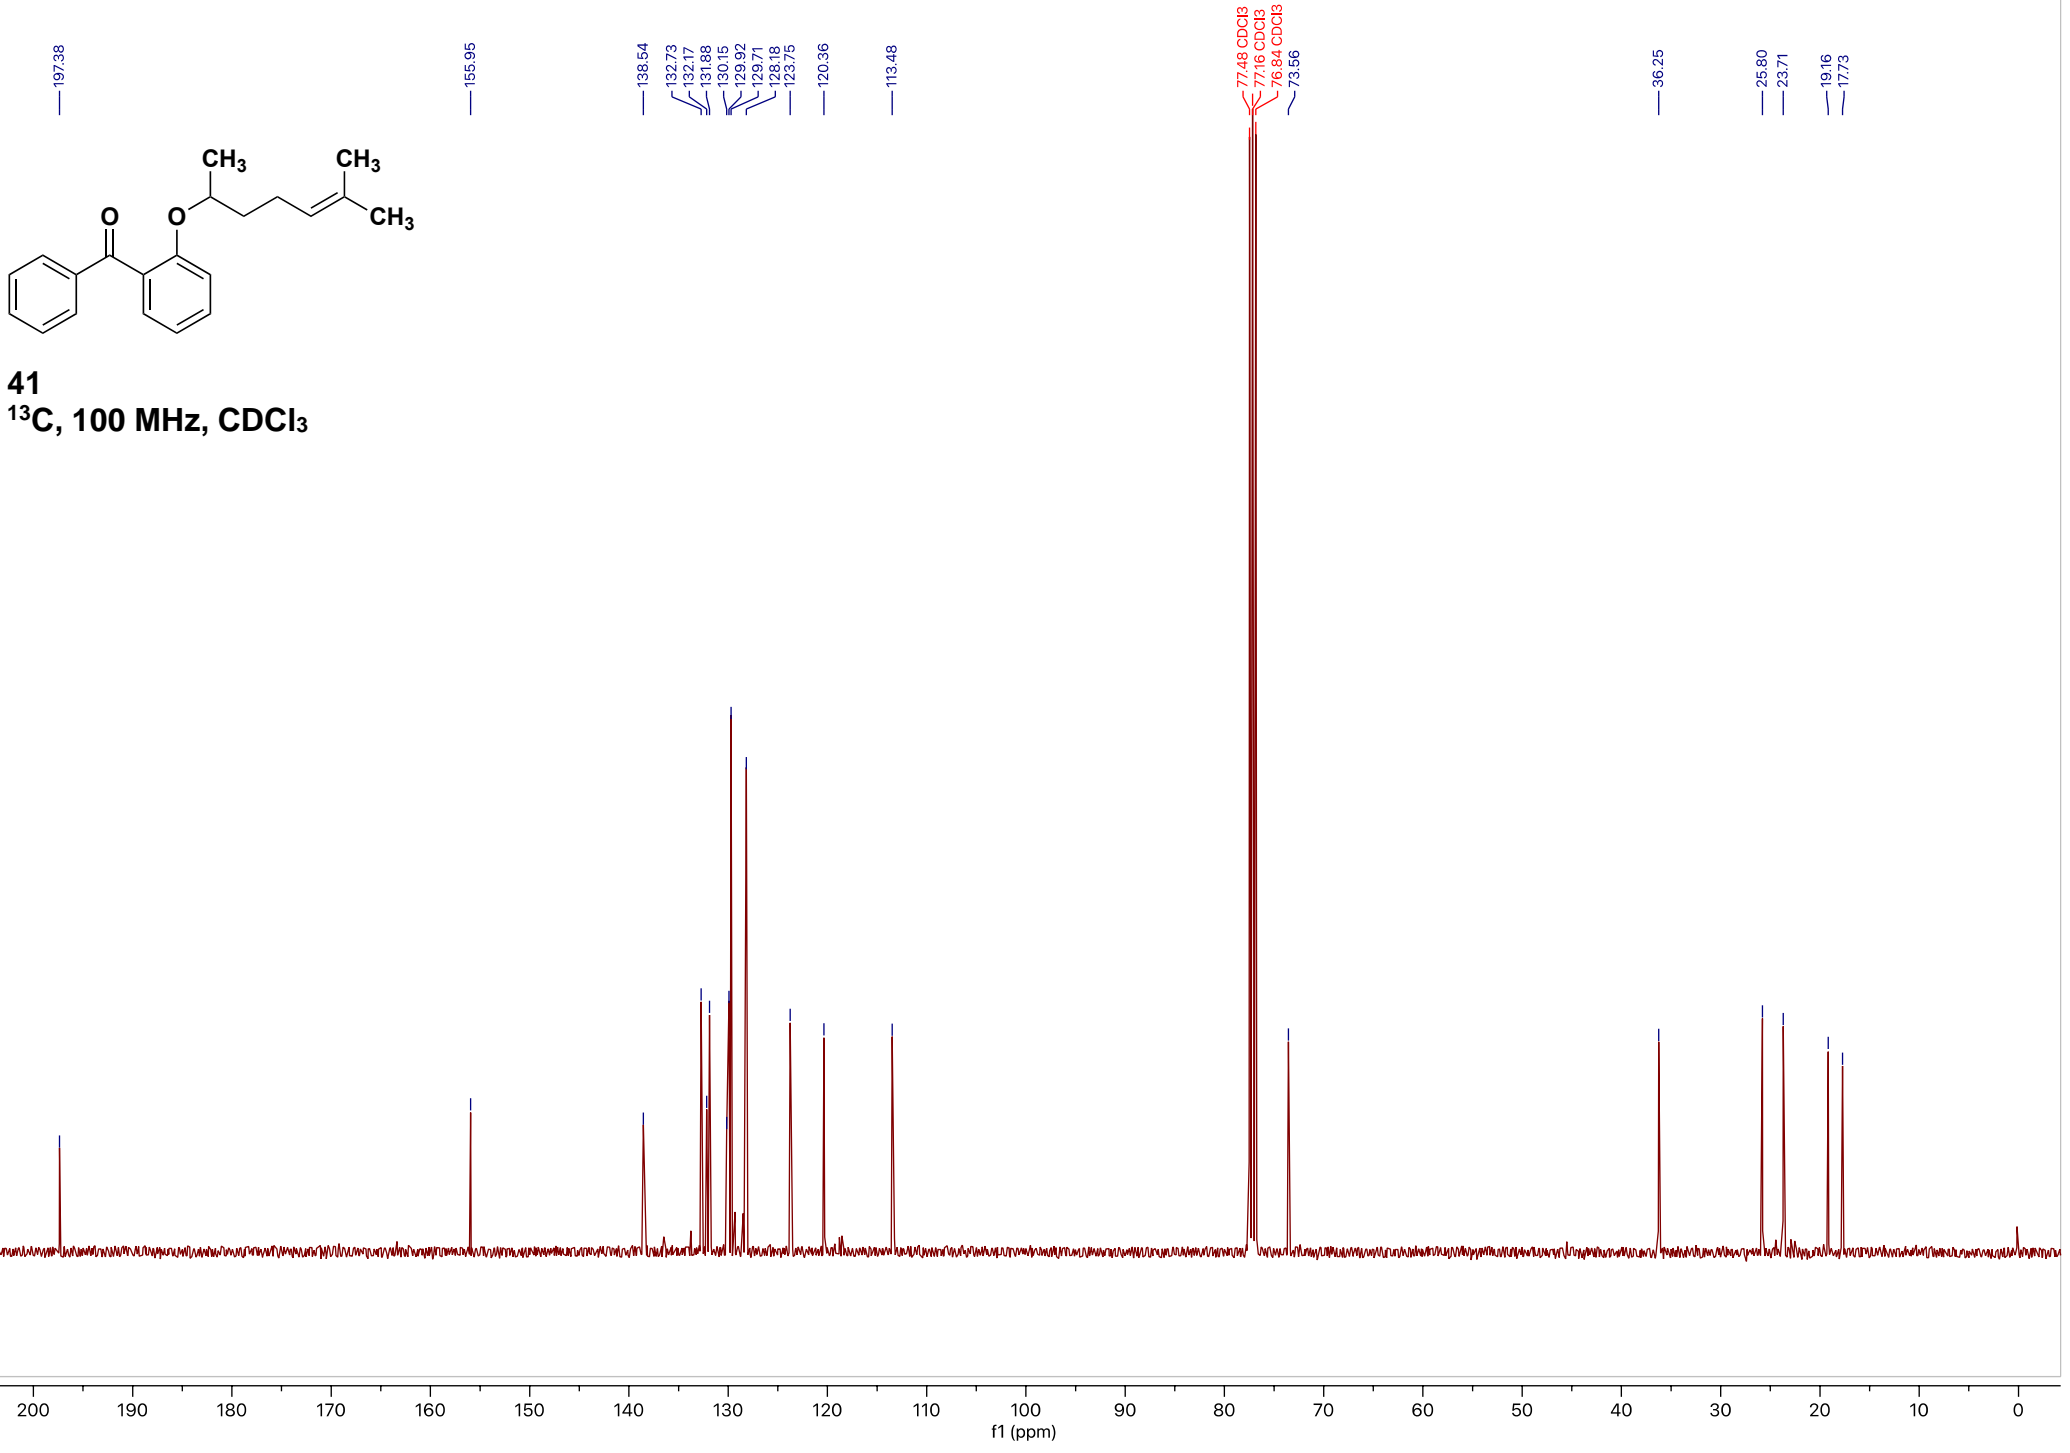

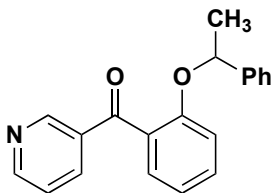

**42**  
<sup>1</sup>H, 400 MHz, CDCl<sub>3</sub>

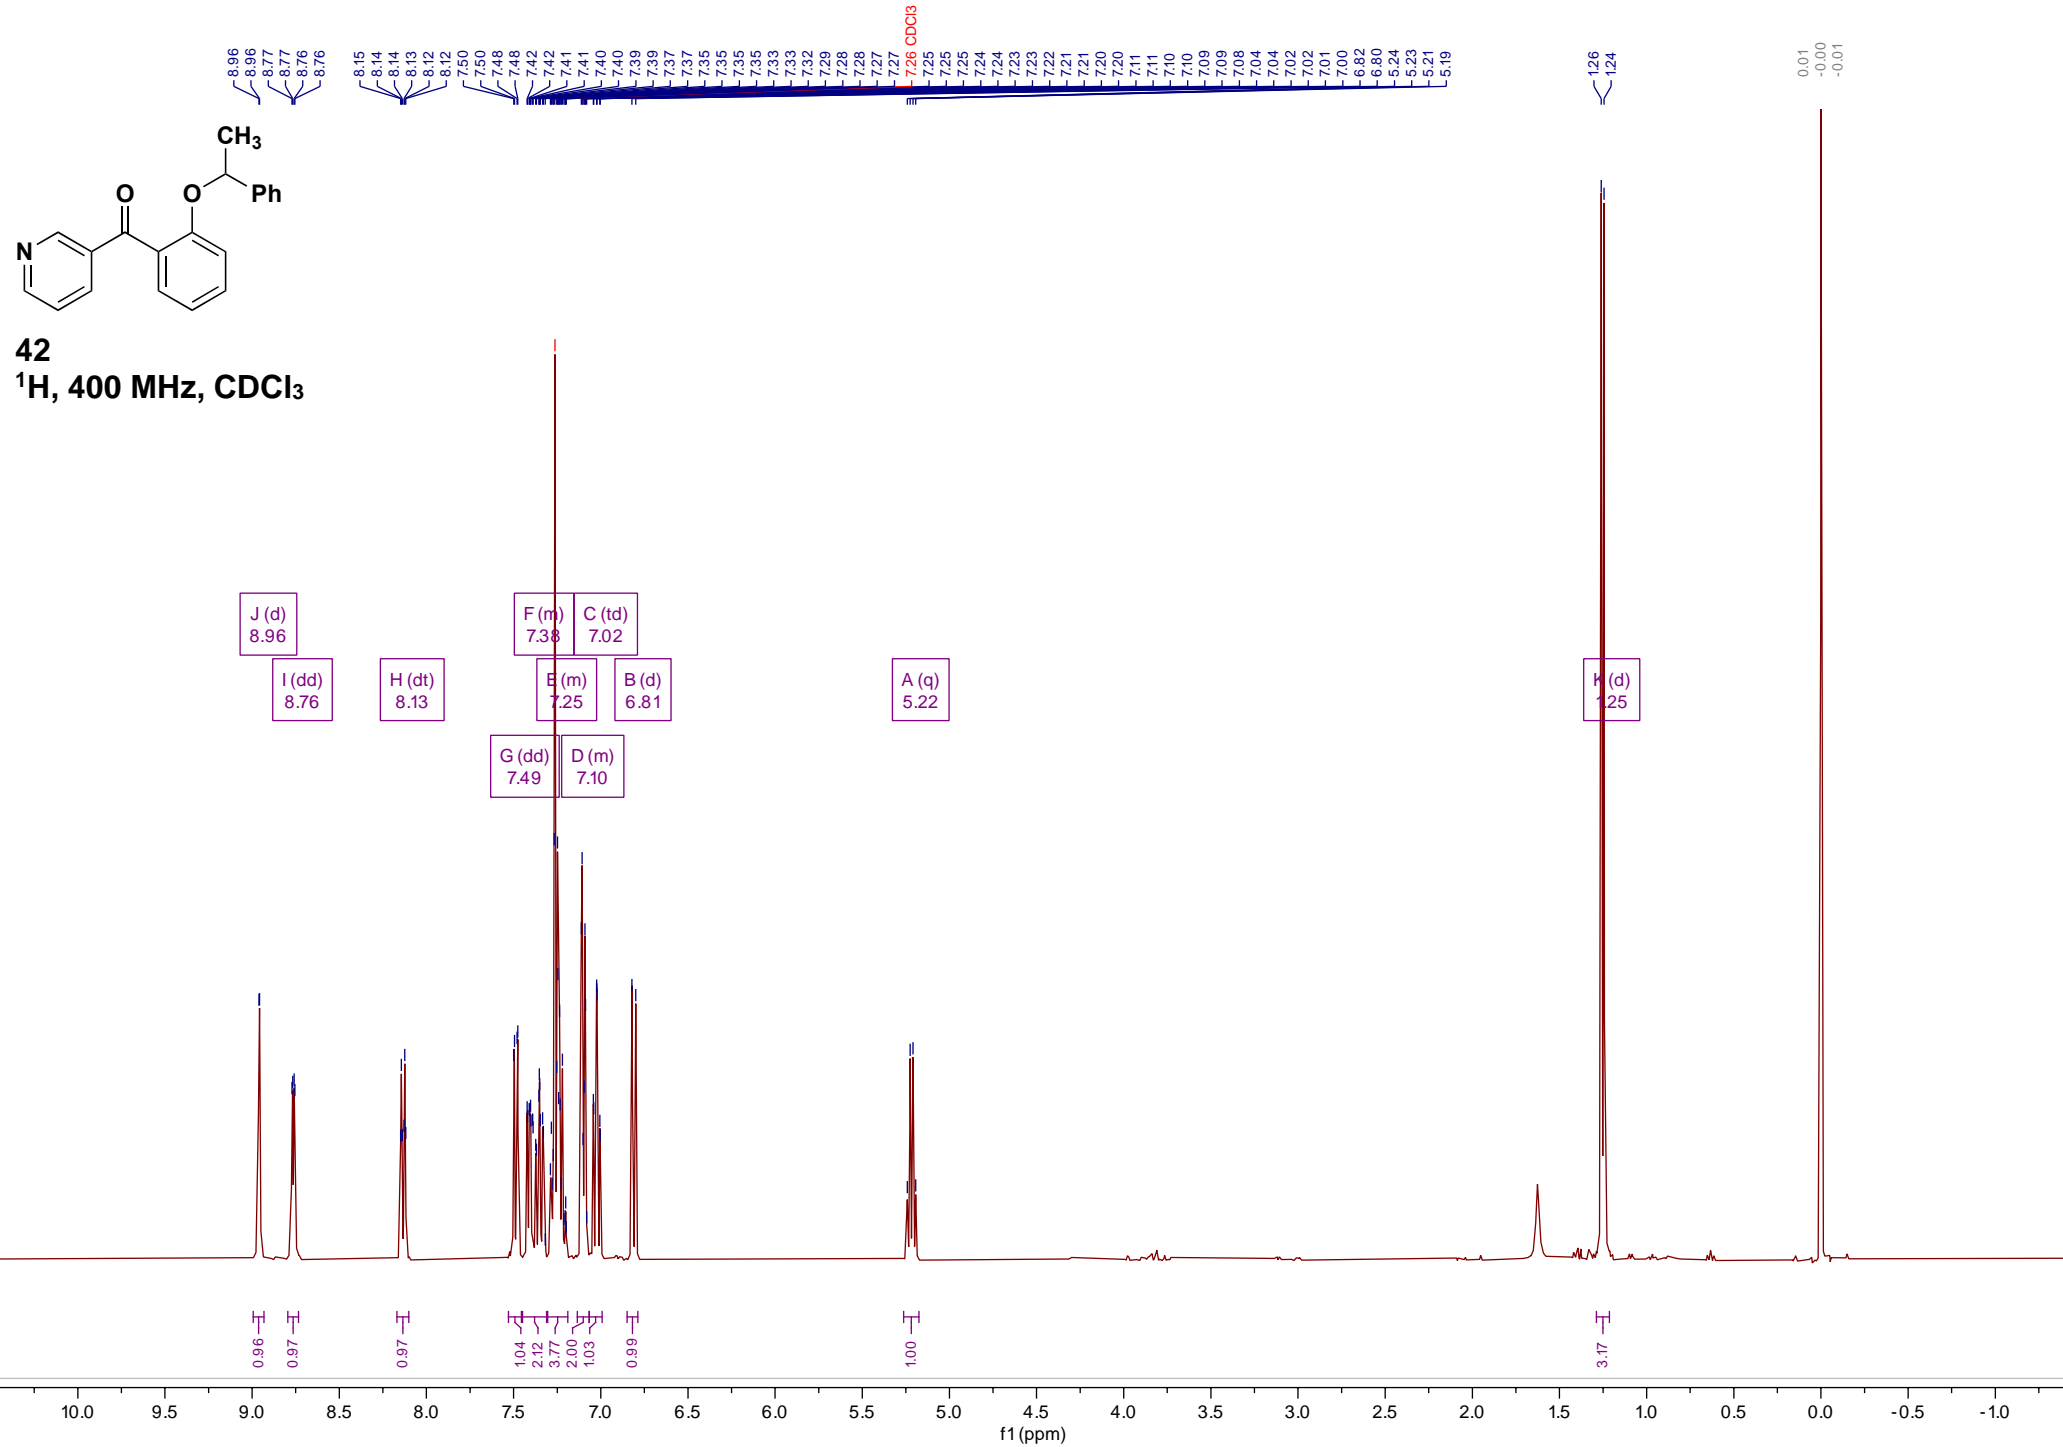

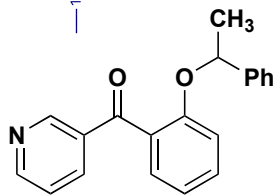

**42**  
**<sup>13</sup>C, 100 MHz, CDCl<sub>3</sub>**

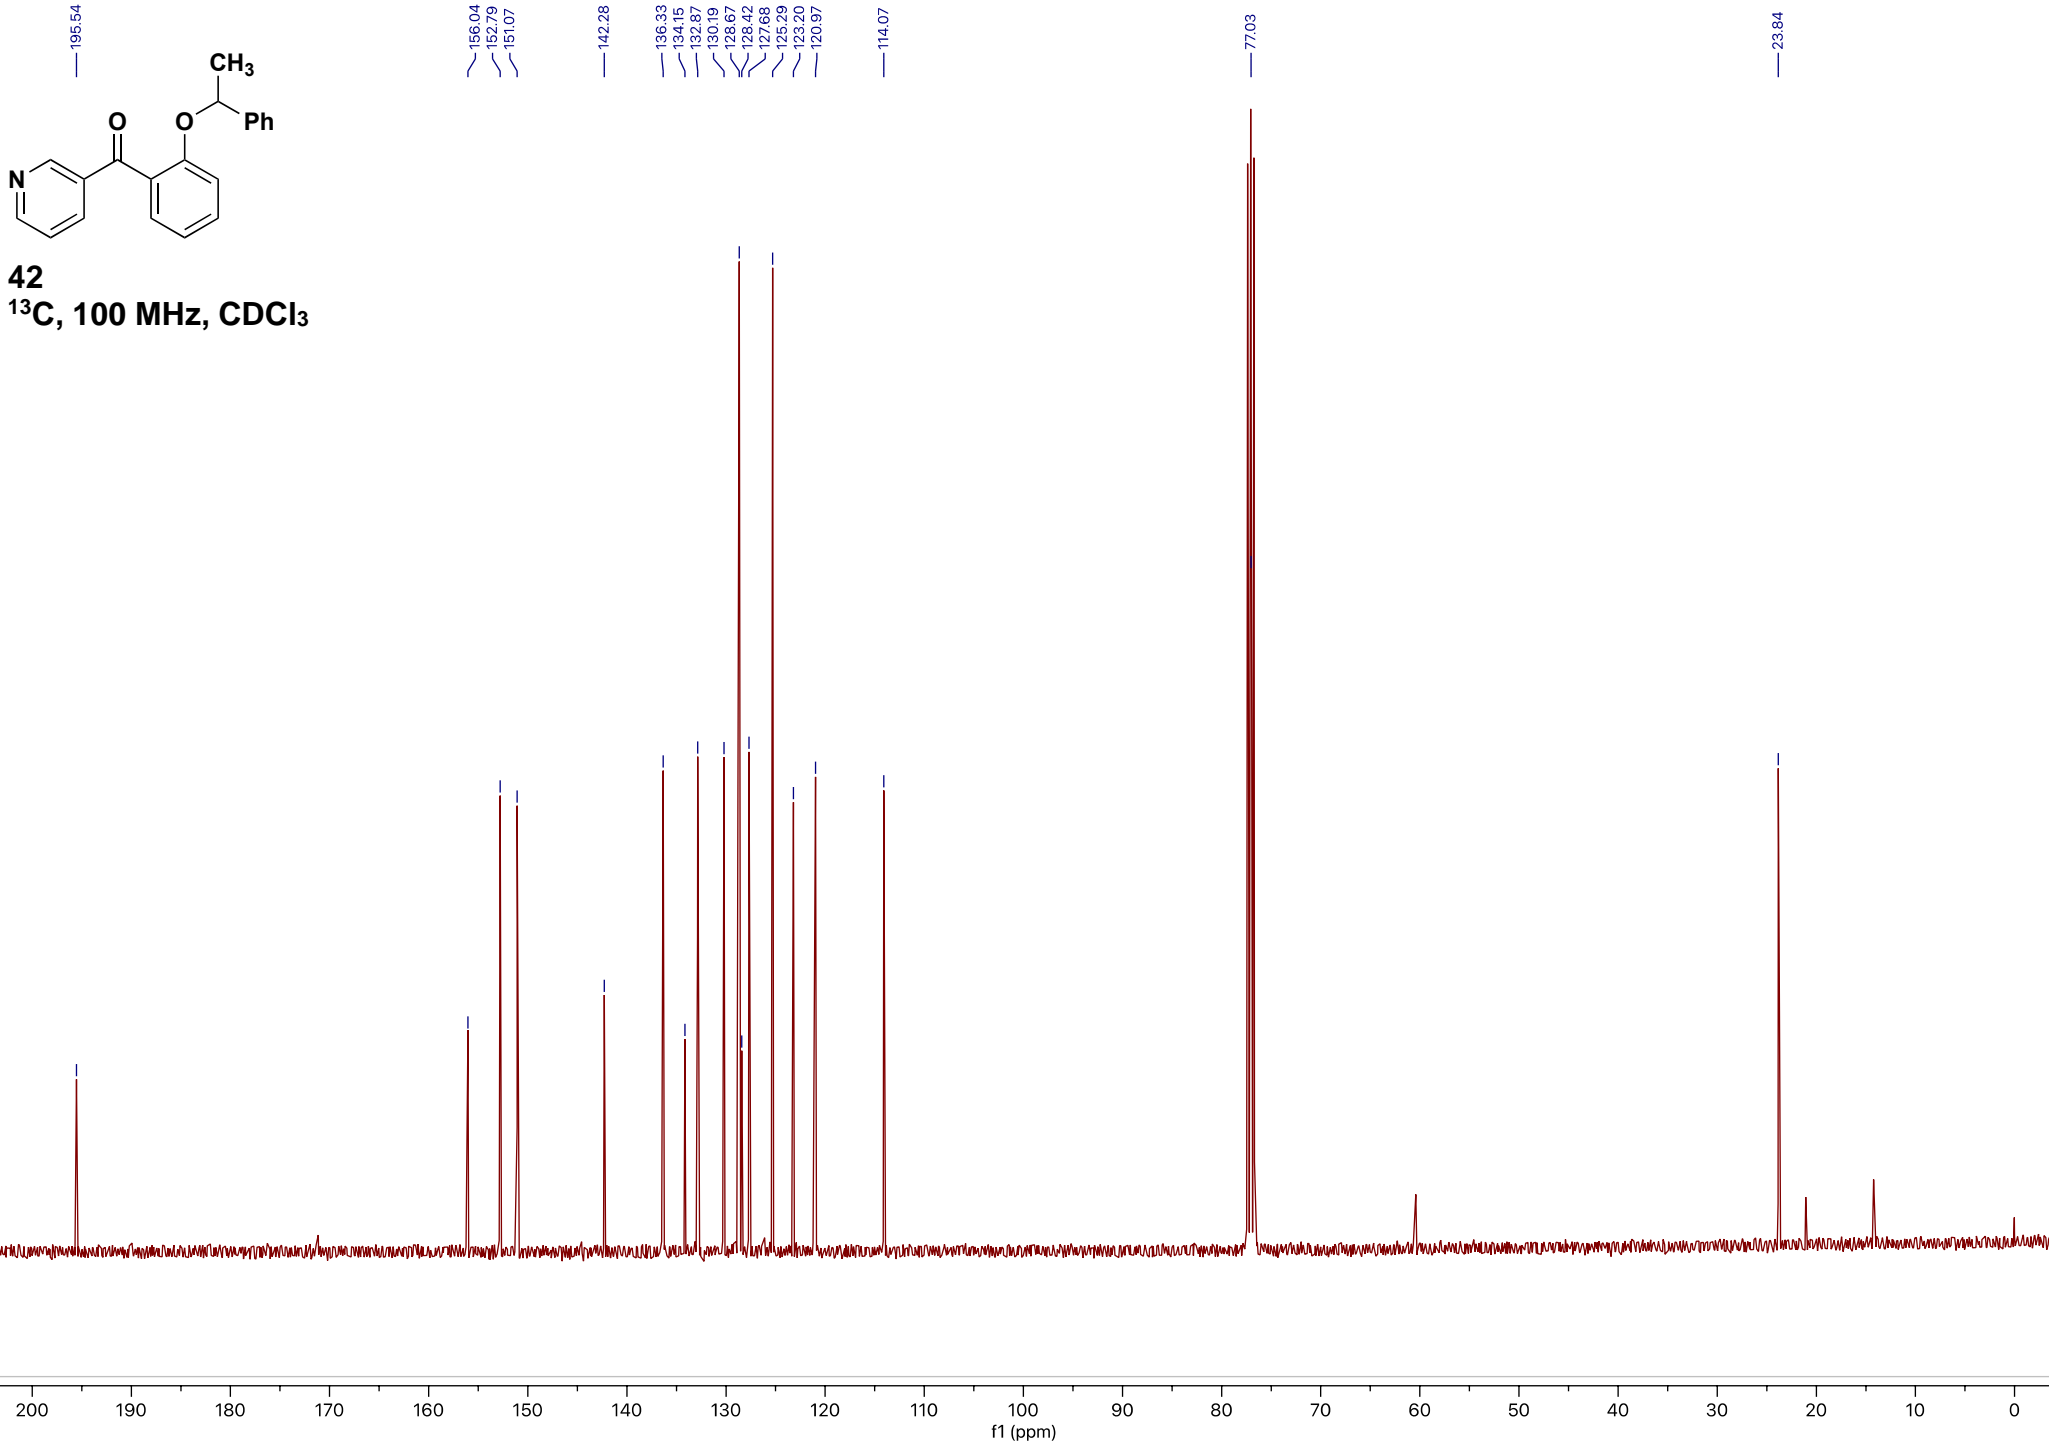



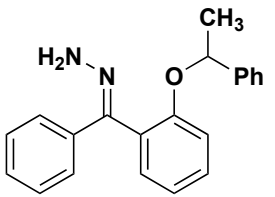

**15**  
**<sup>1</sup>H, 400 MHz, CDCl<sub>3</sub>**

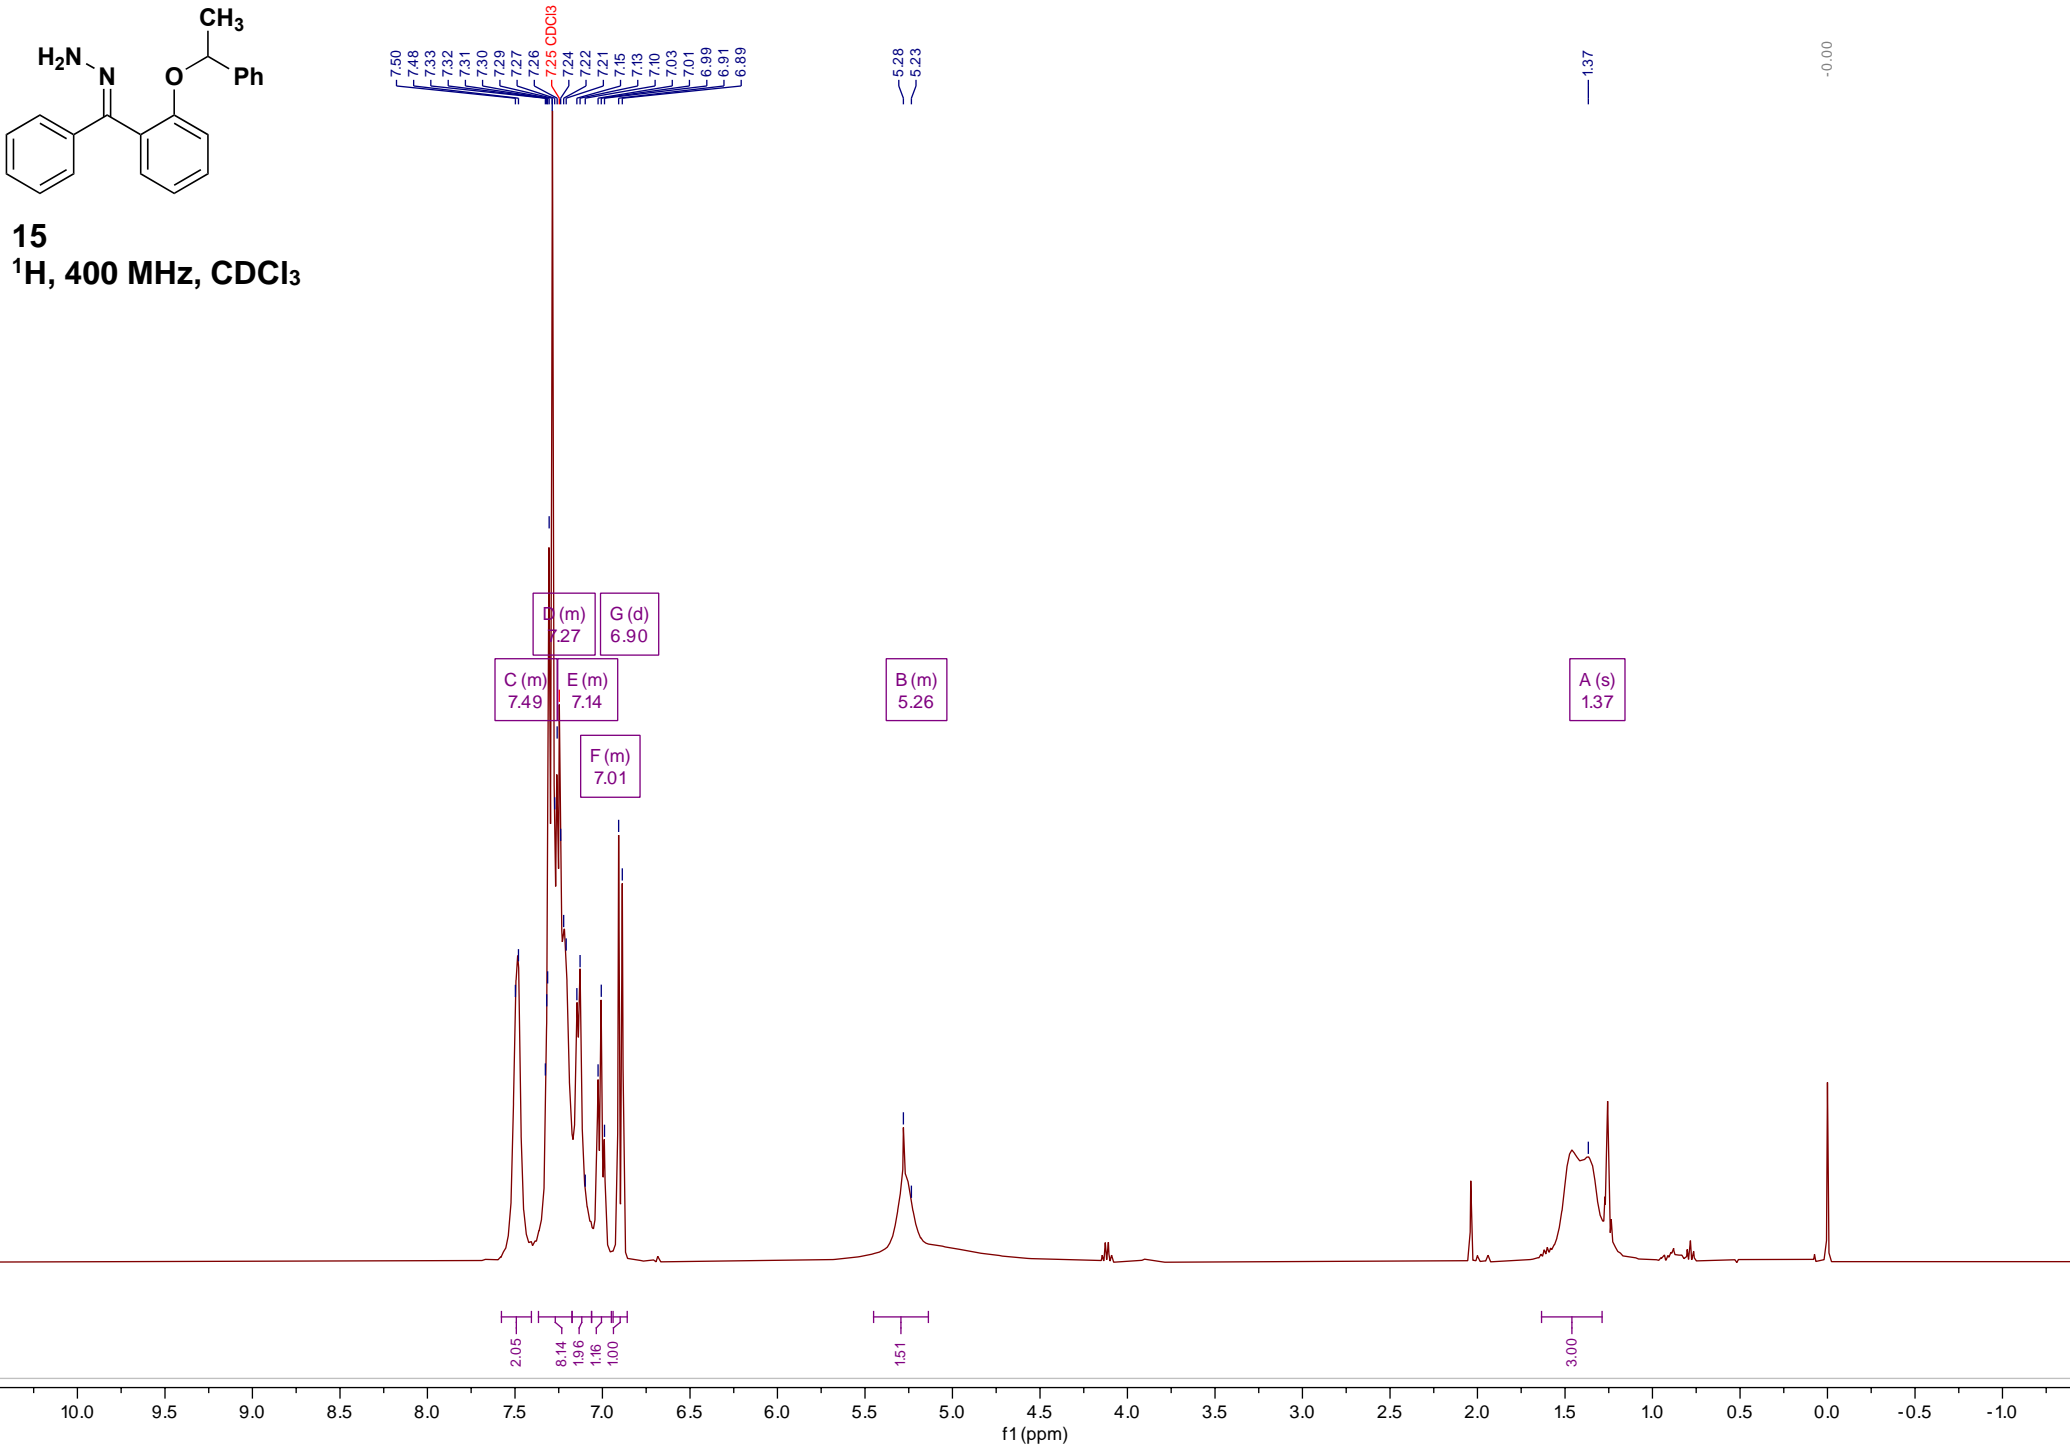

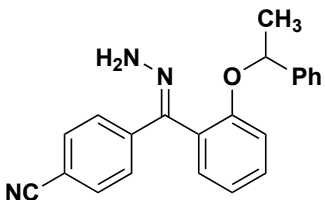

**1**  
<sup>1</sup>H, 600 MHz, CDCl<sub>3</sub>

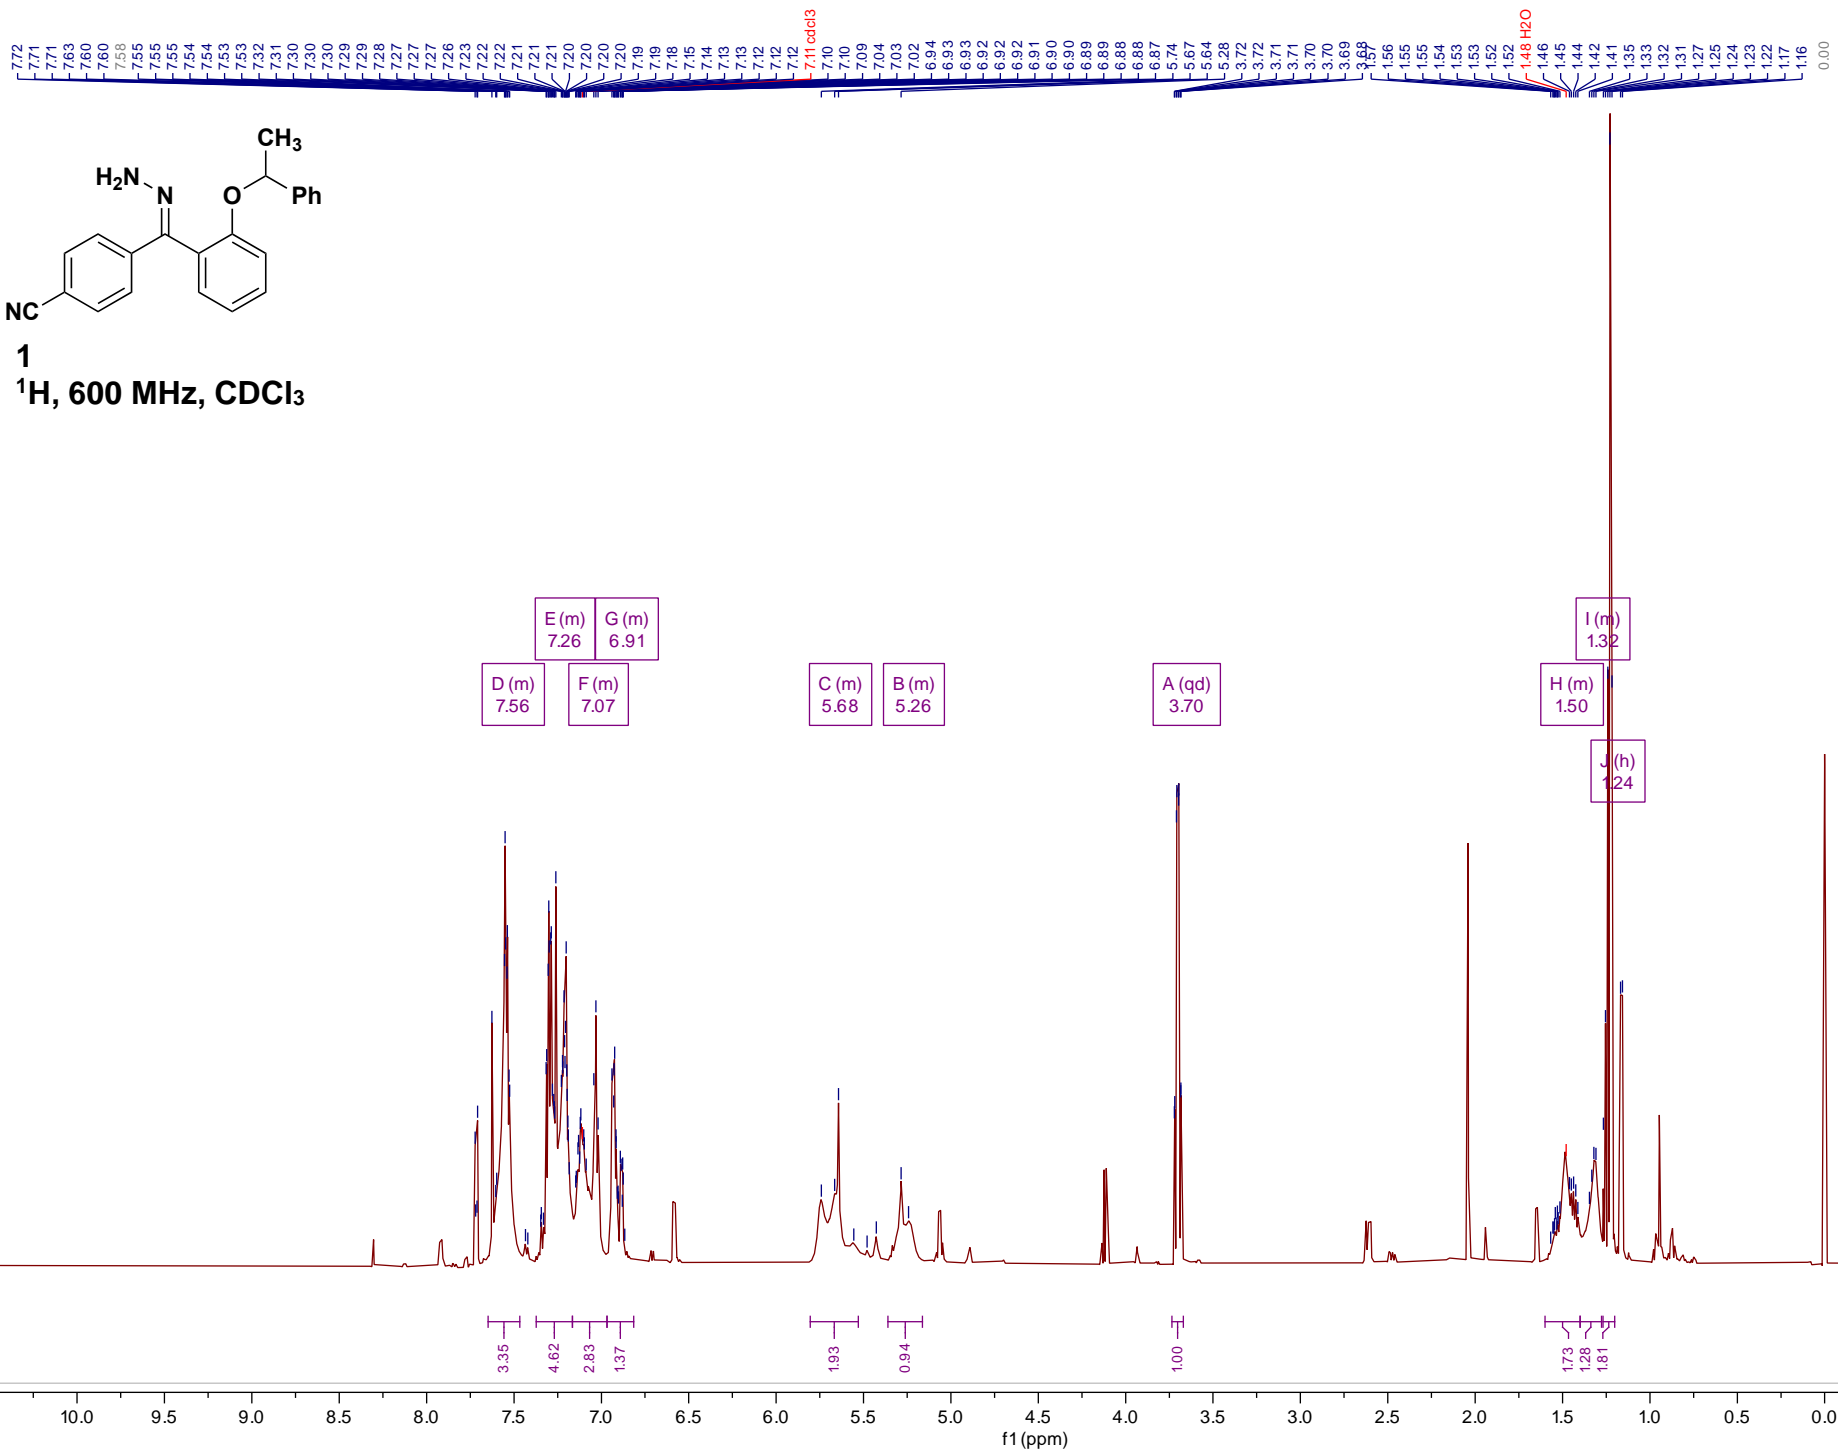

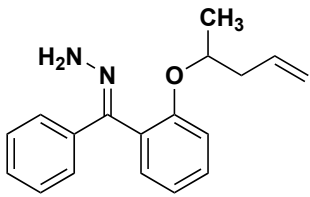

**2**  
<sup>1</sup>H, 600 MHz, CDCl<sub>3</sub>

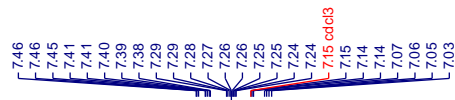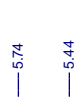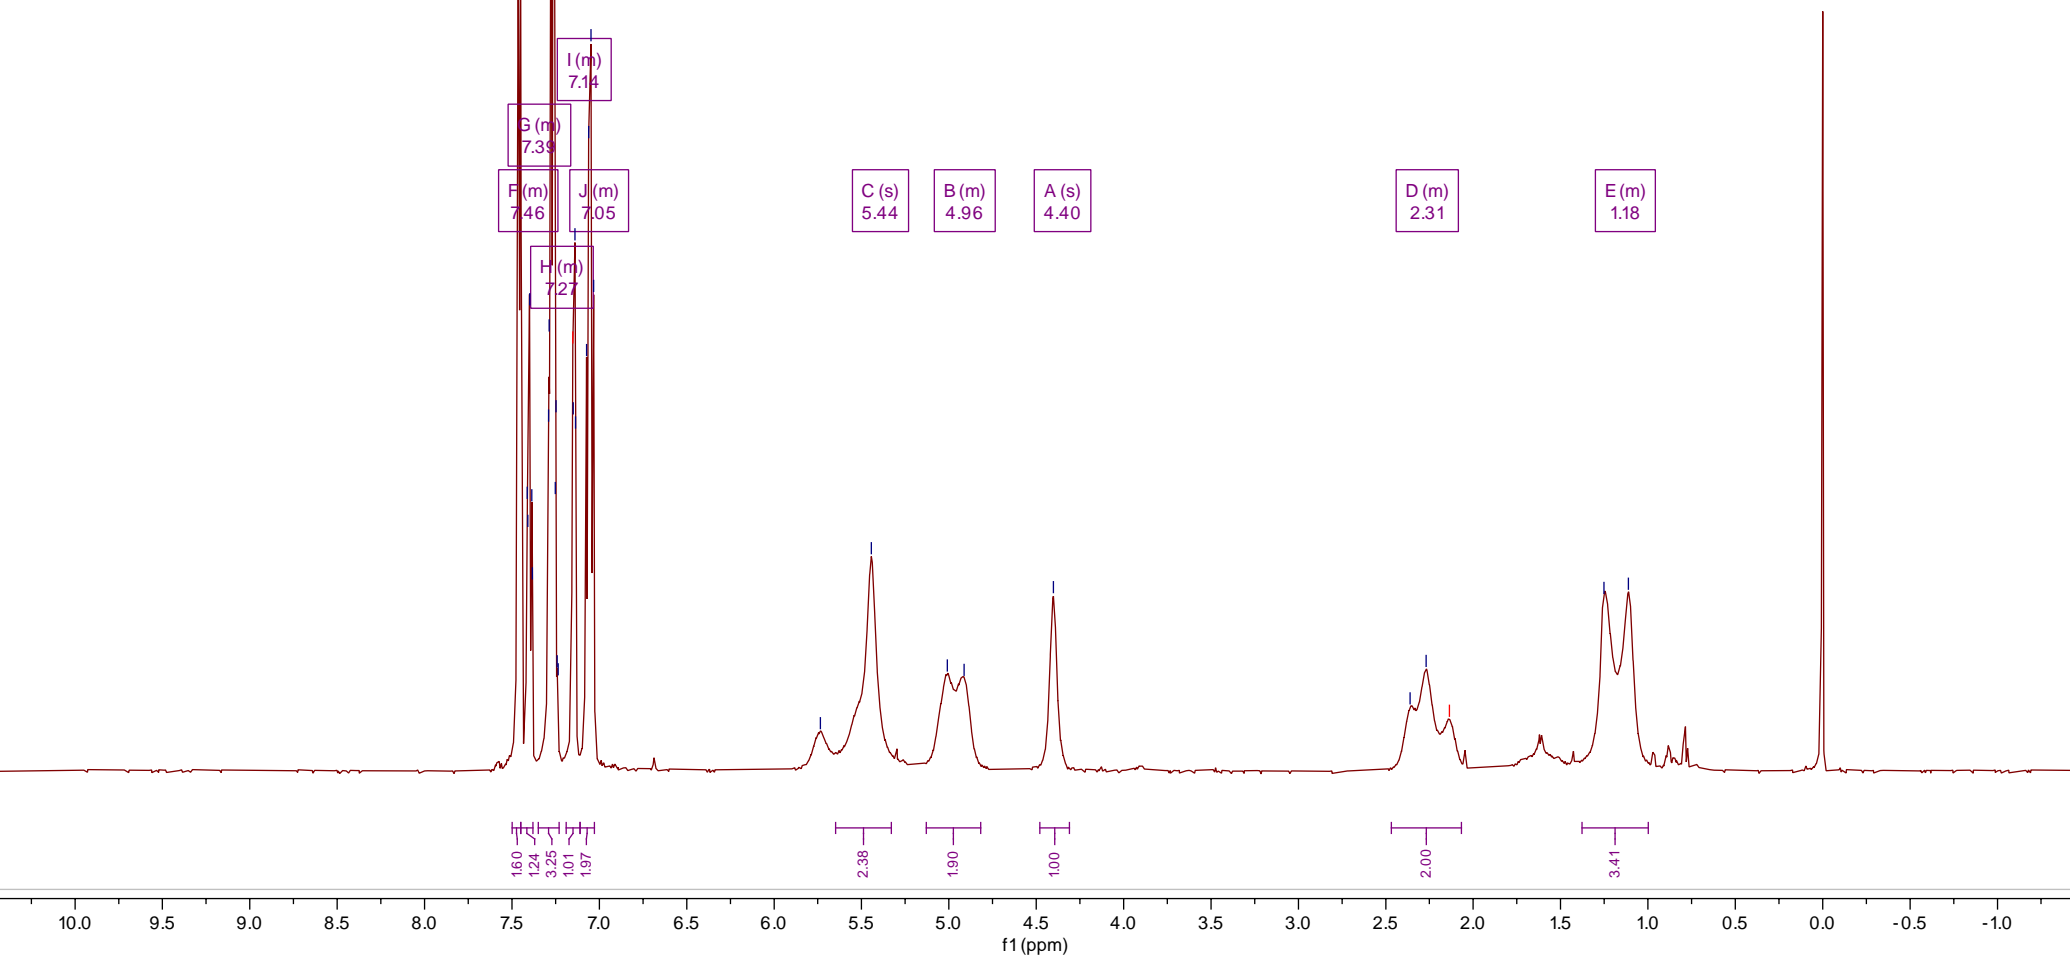

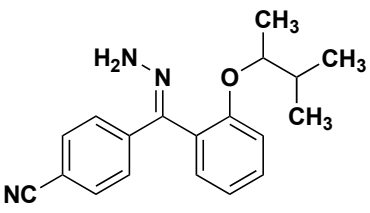

**18**  
<sup>1</sup>H, 400 MHz, CDCl<sub>3</sub>

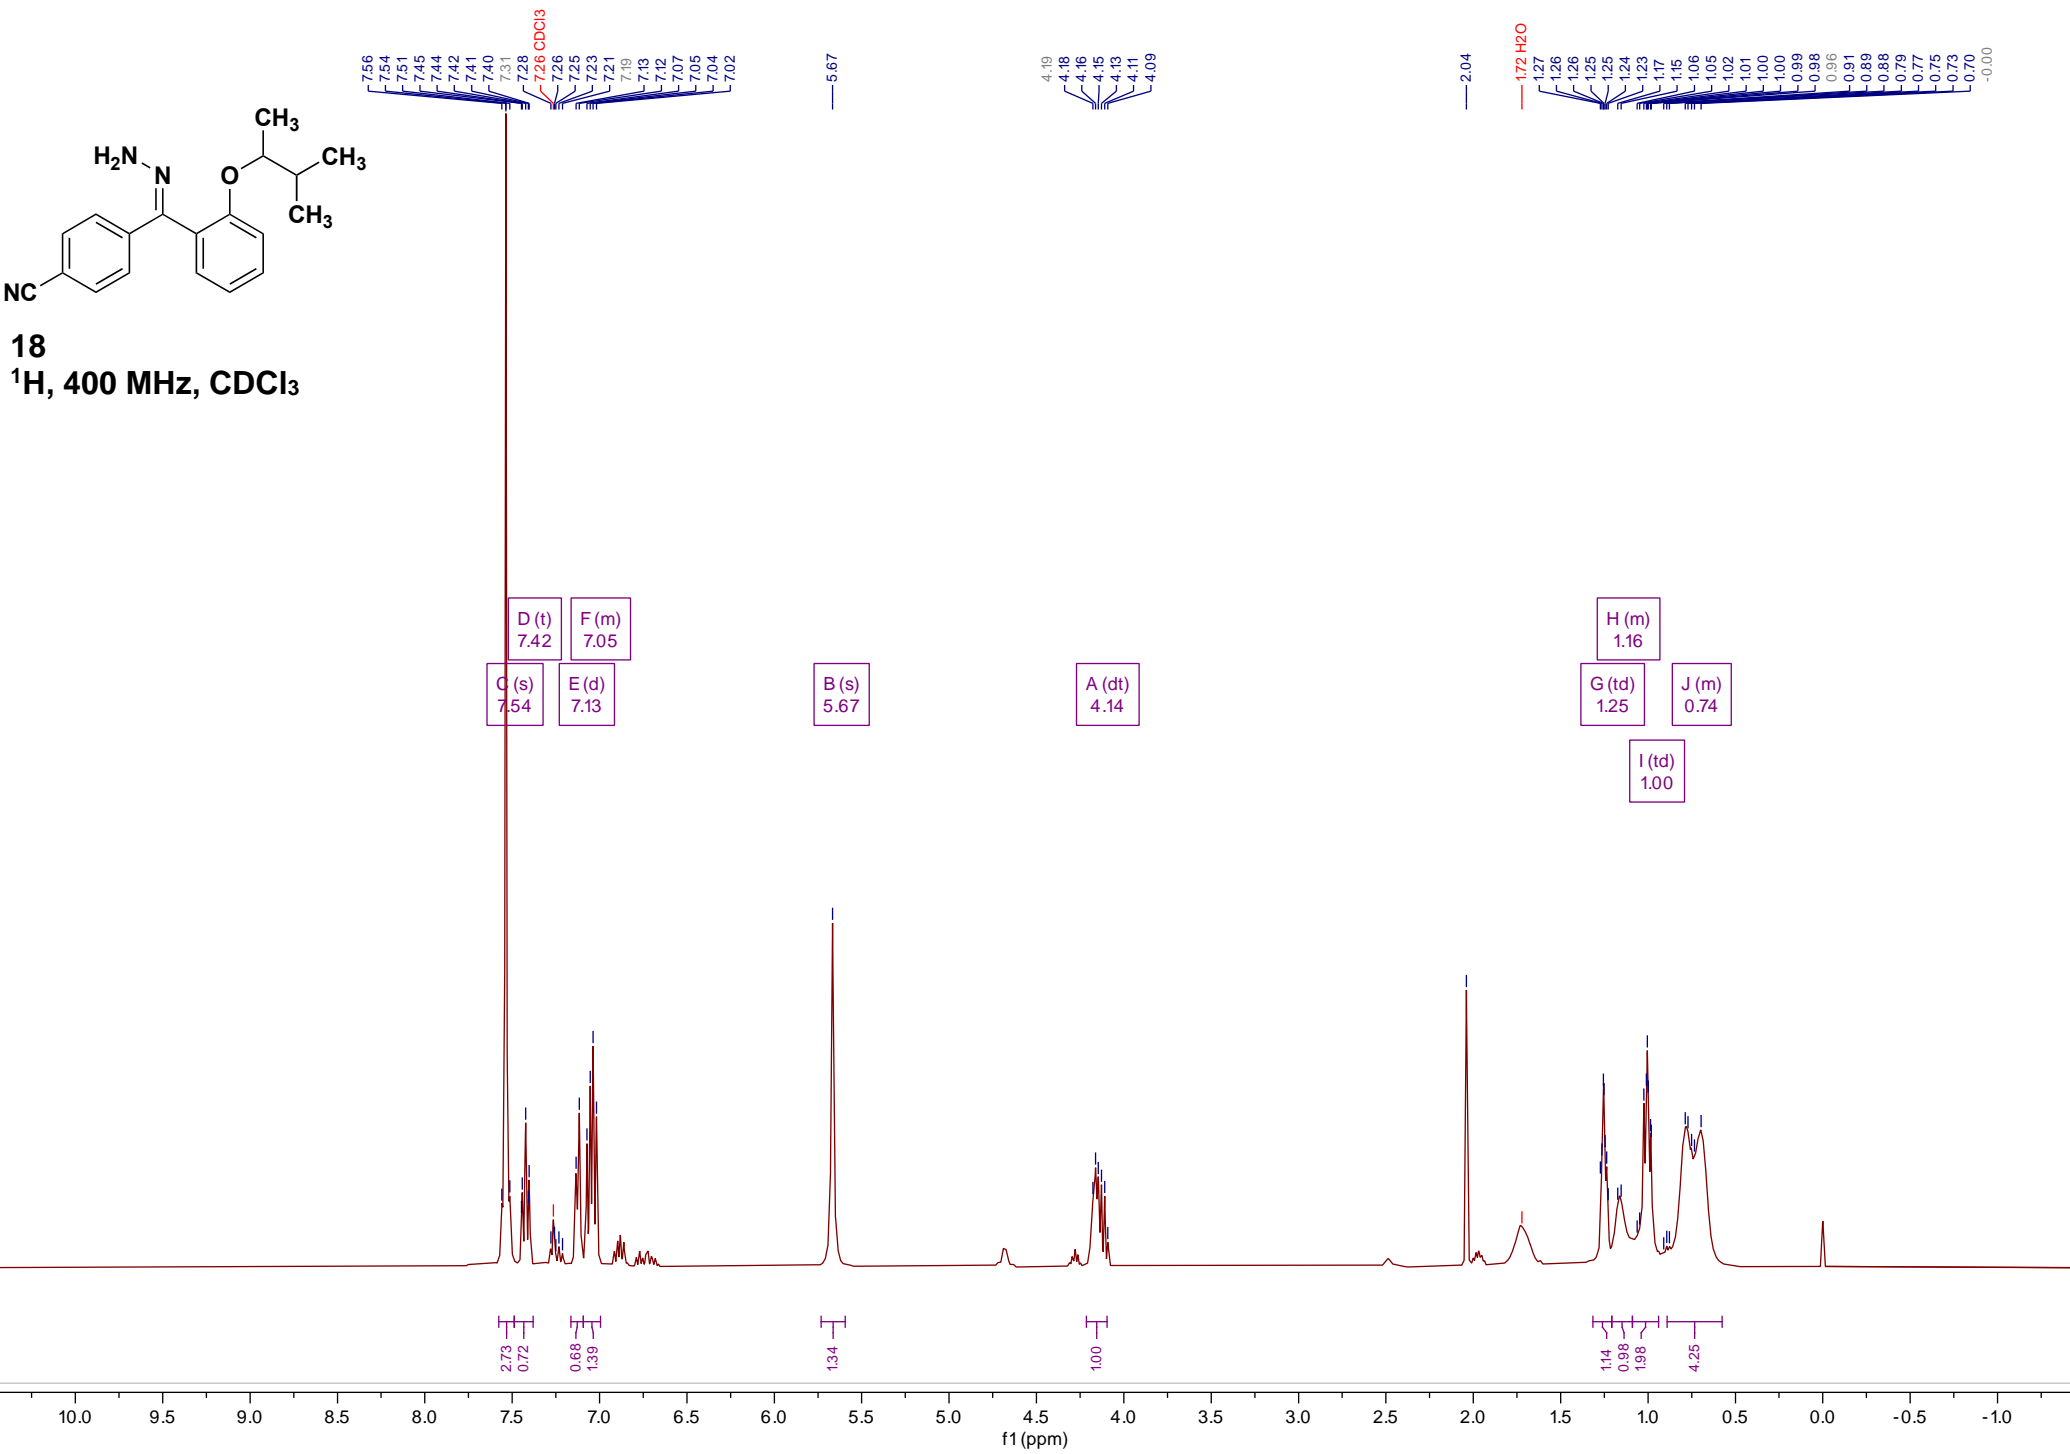

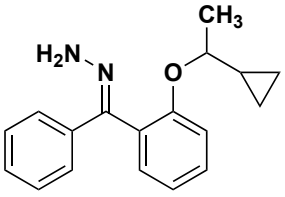

**17**  
**<sup>1</sup>H, 600 MHz, CDCl<sub>3</sub>**

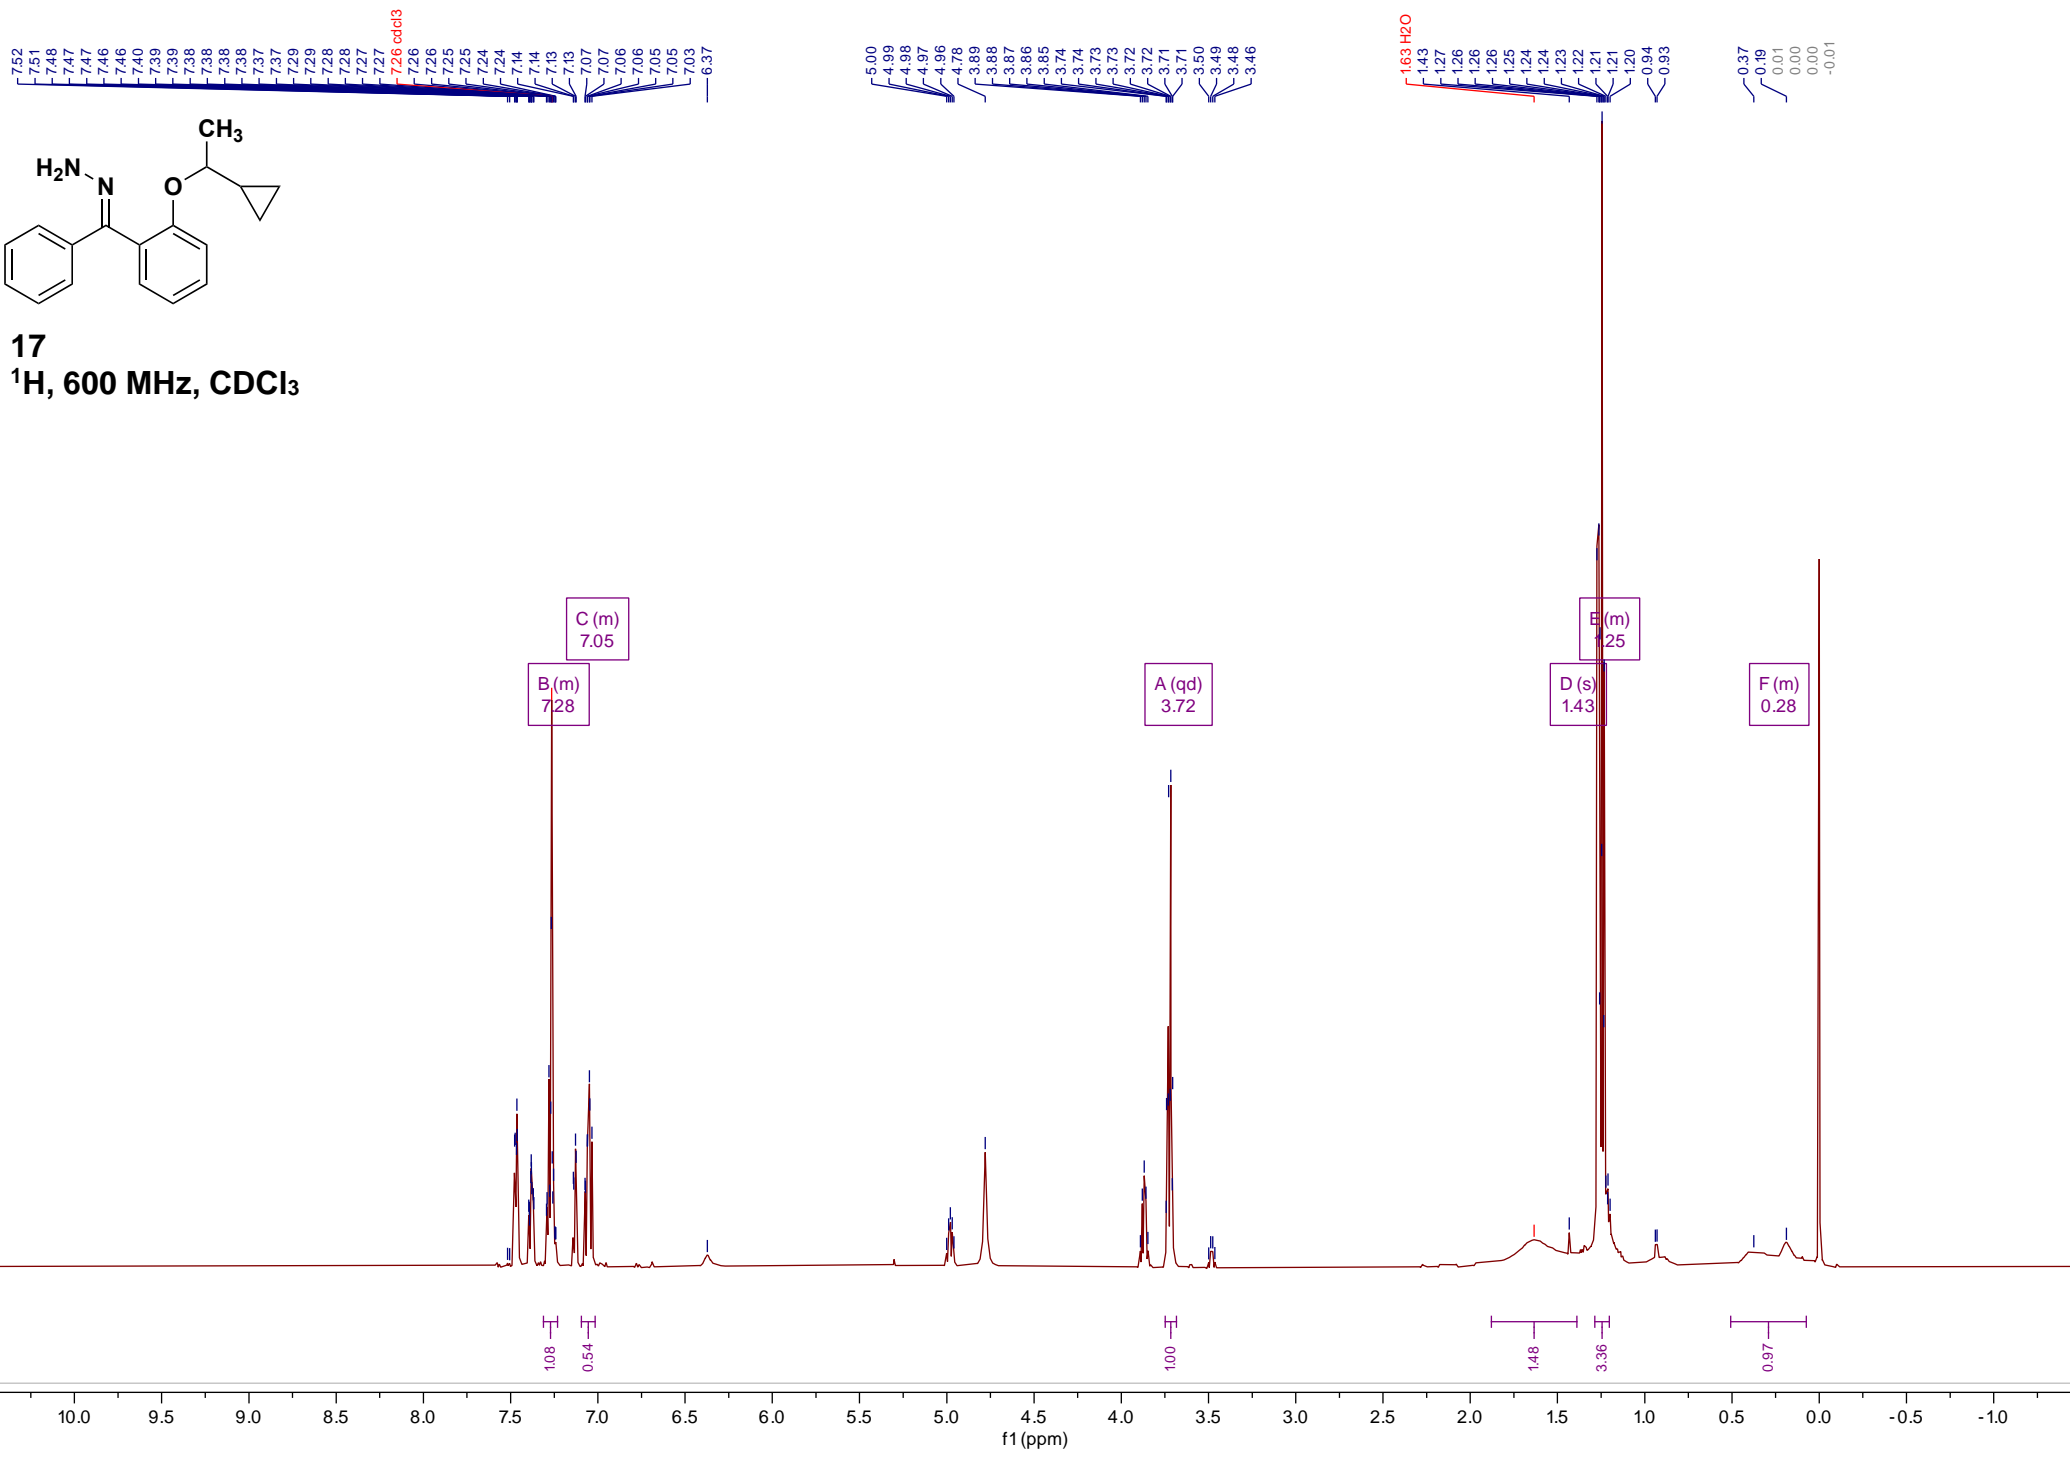

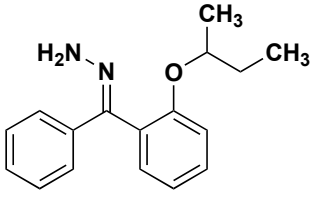

**14**  
<sup>1</sup>H, 600 MHz, CDCl<sub>3</sub>

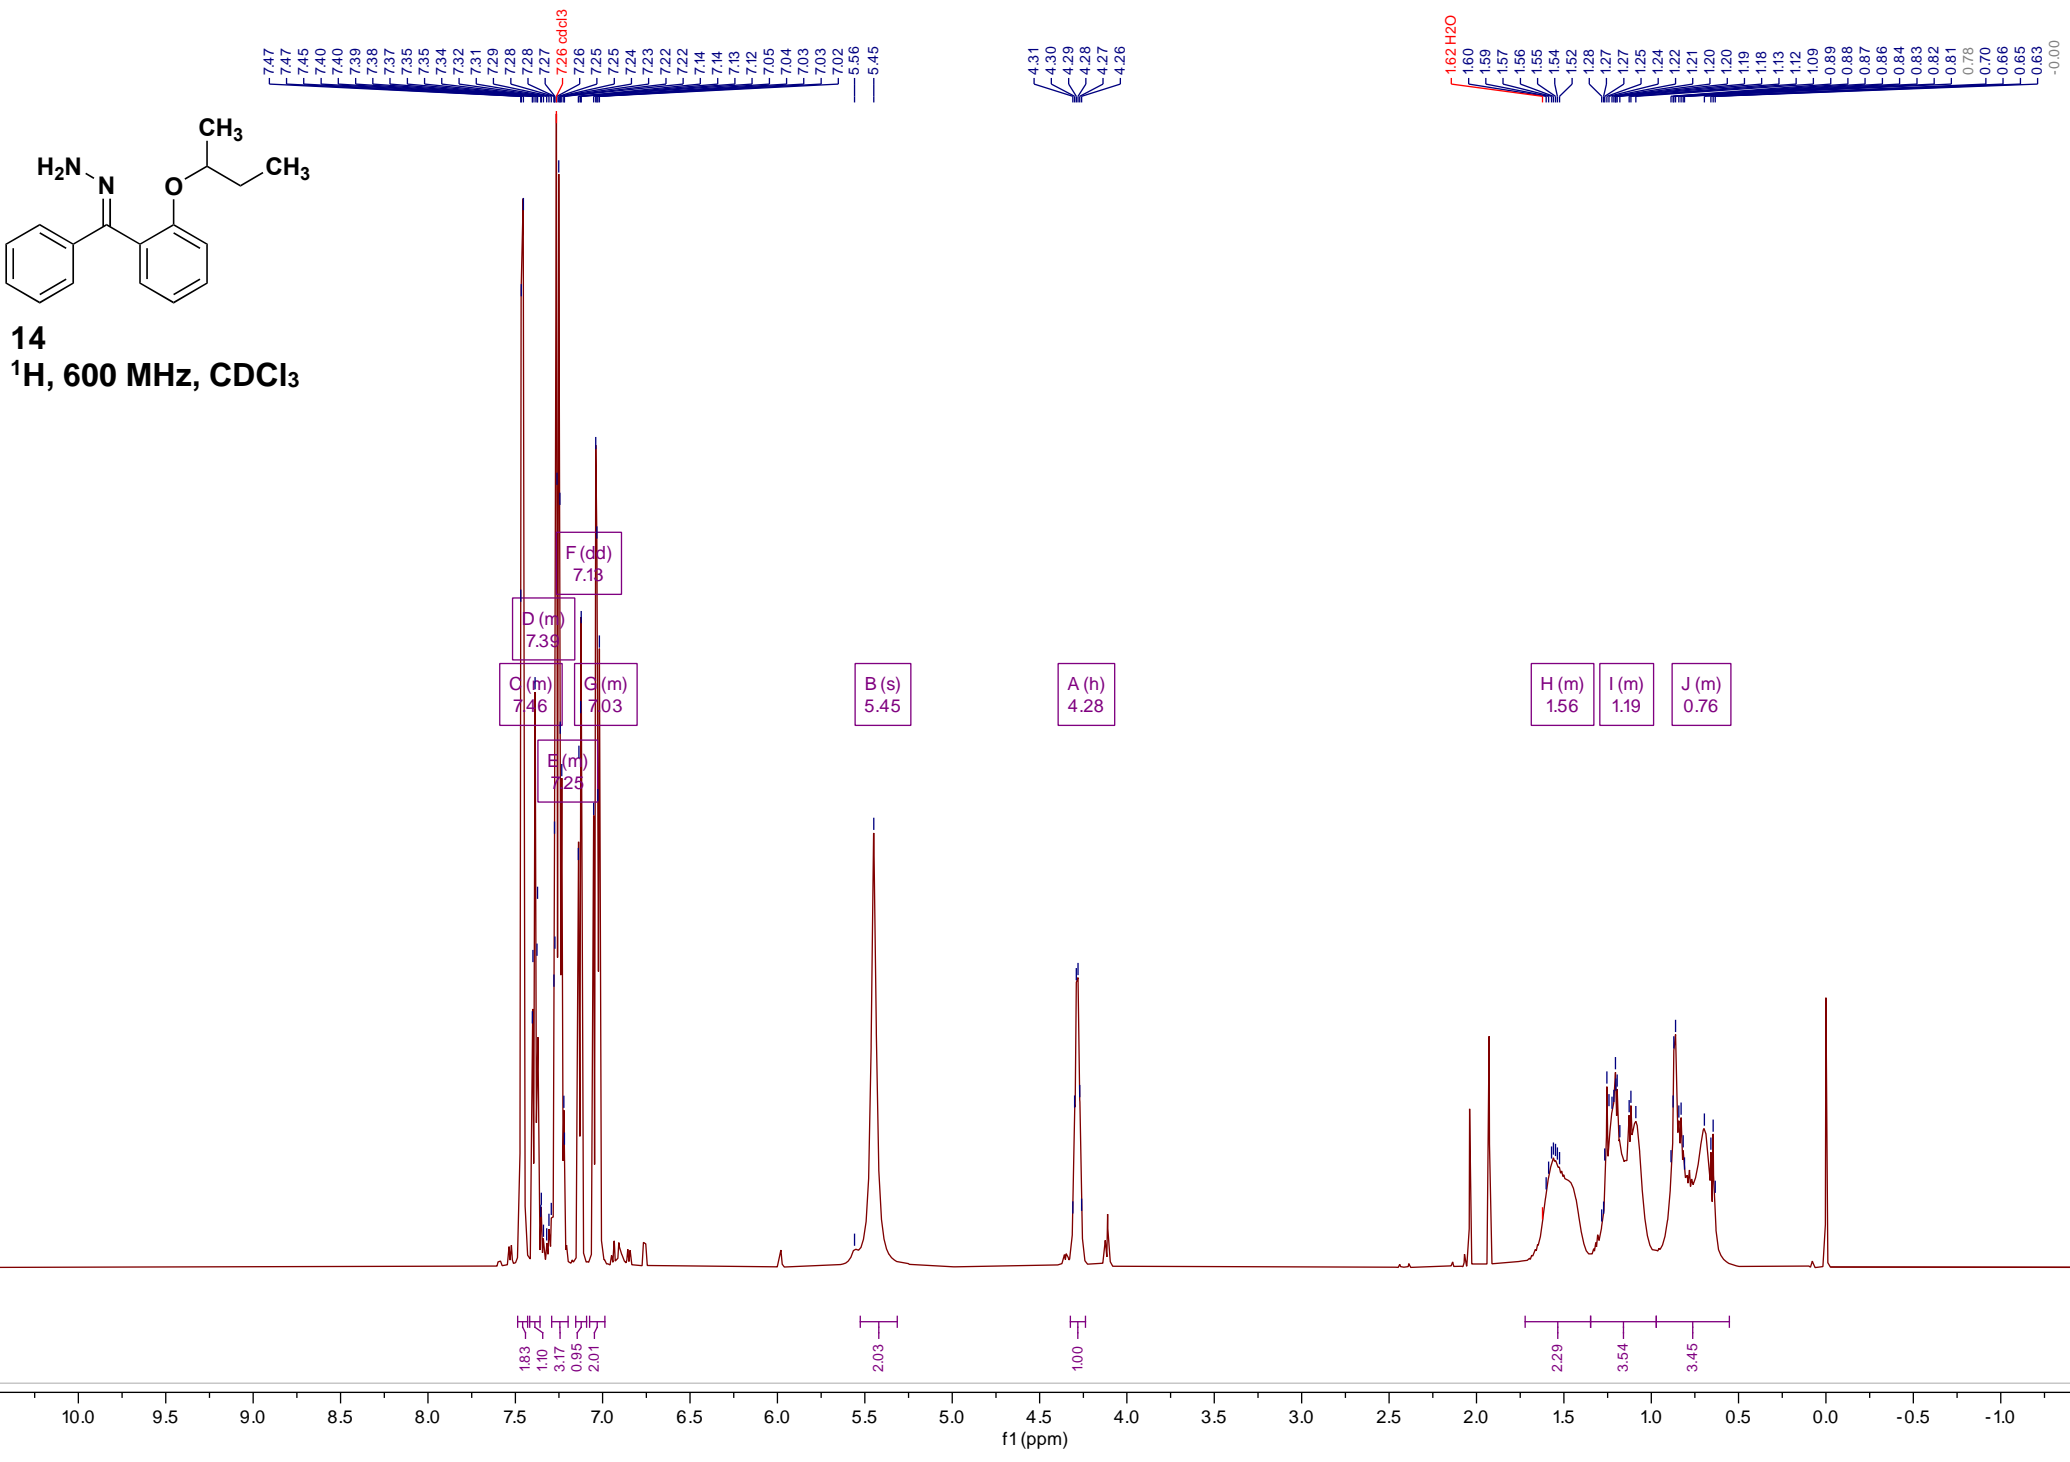

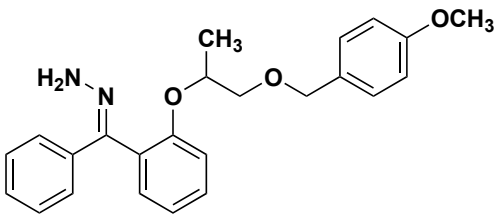

**19**  
<sup>1</sup>H, 400 MHz, CDCl<sub>3</sub>

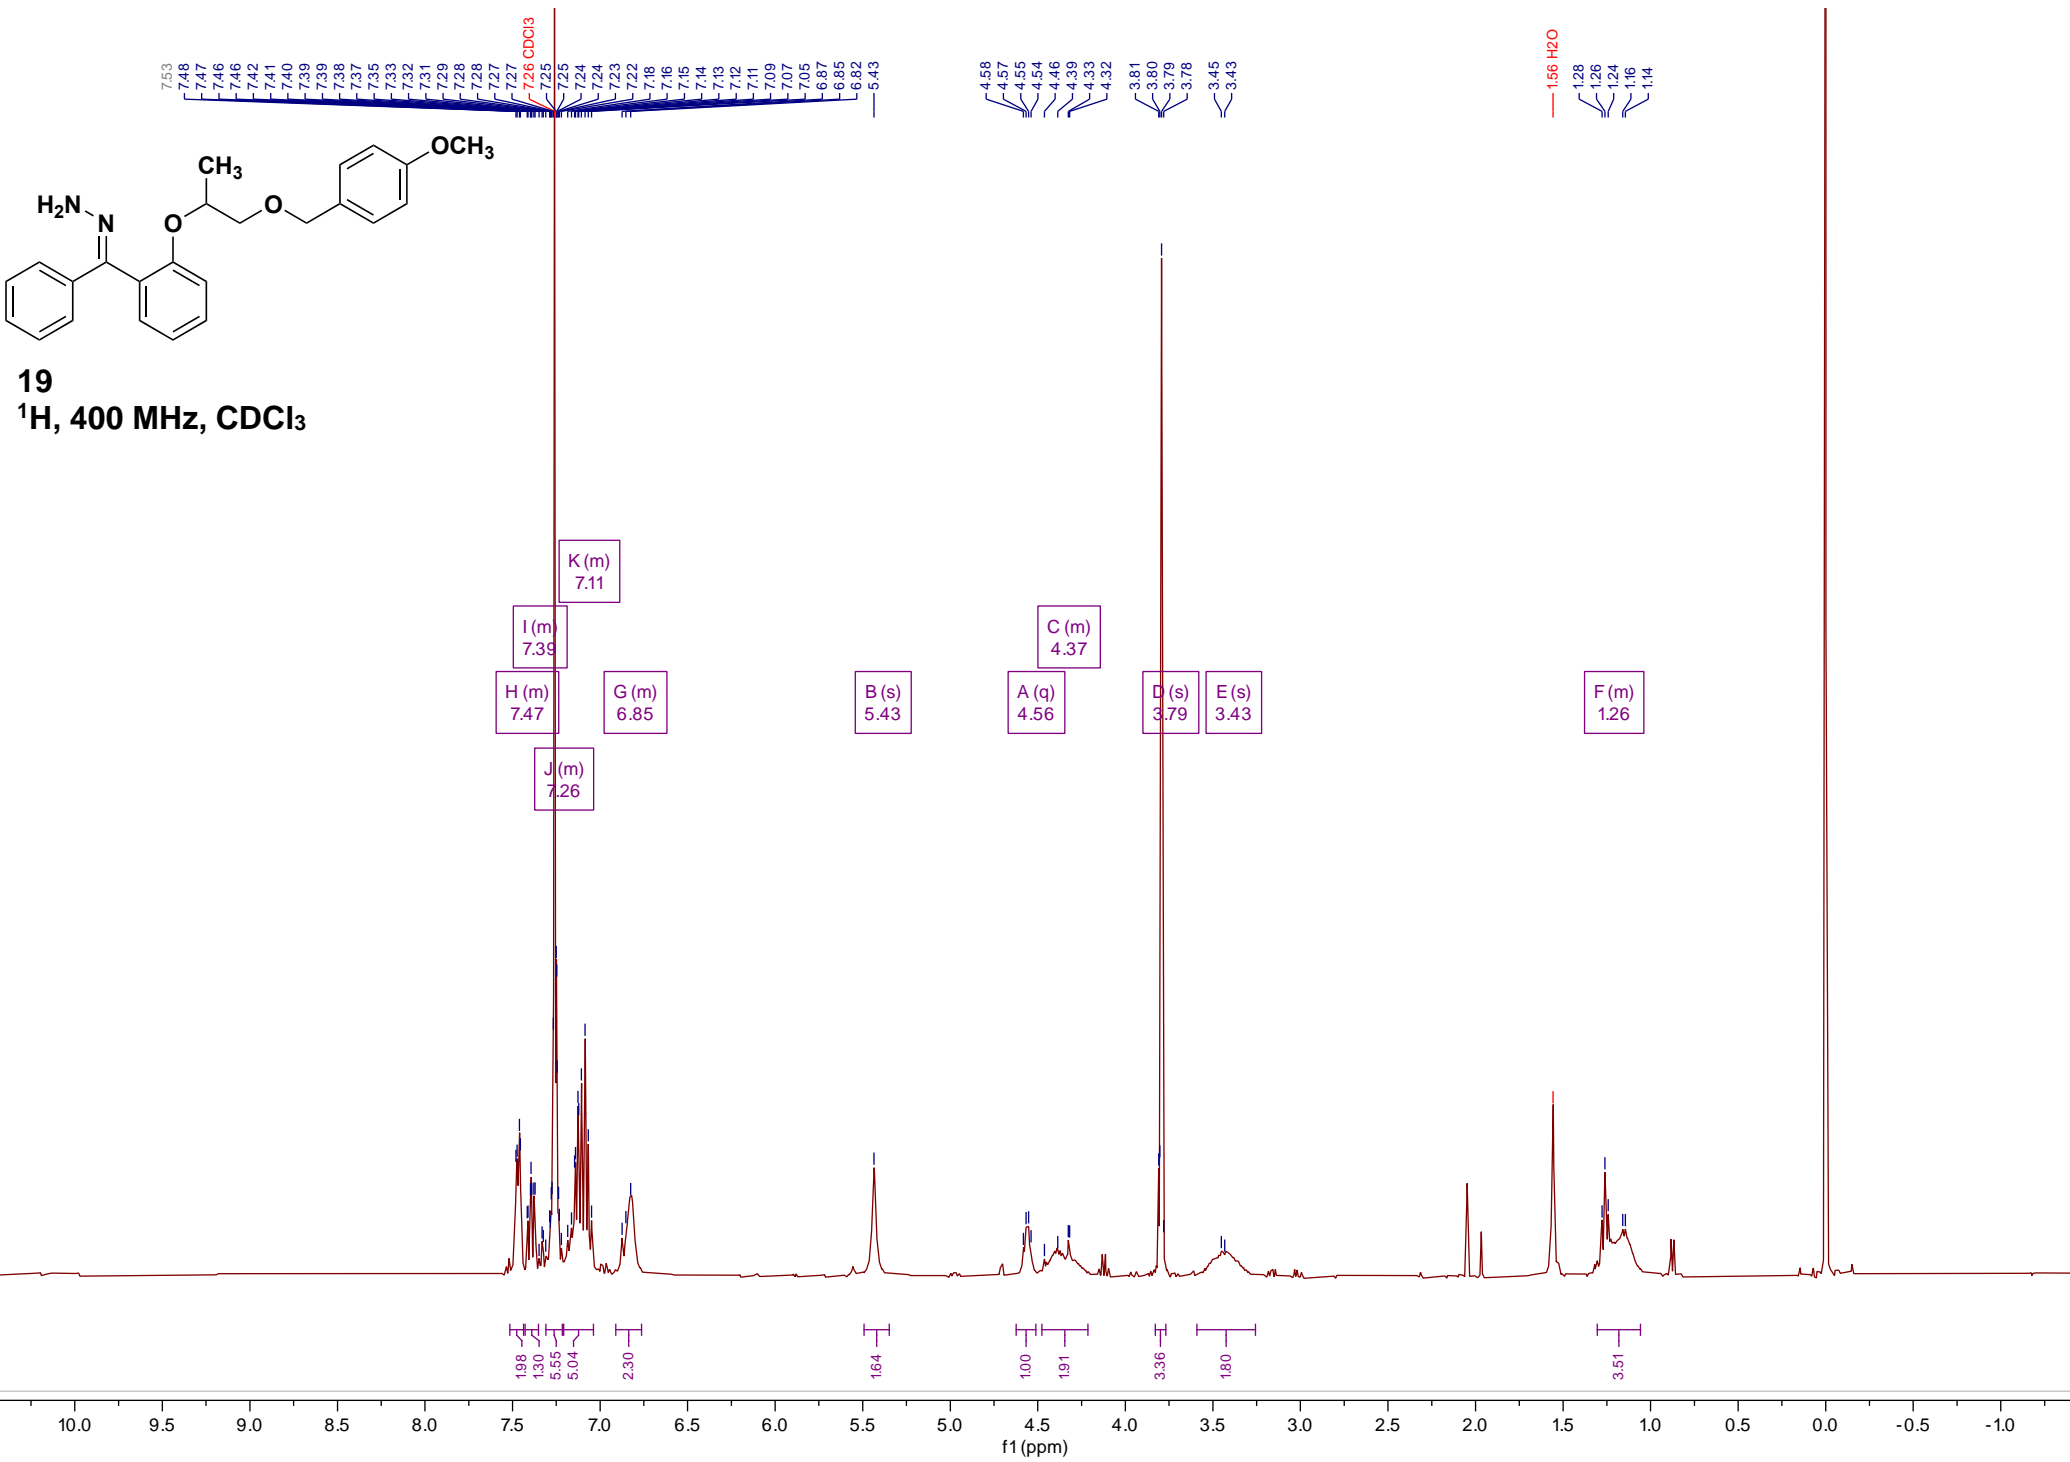

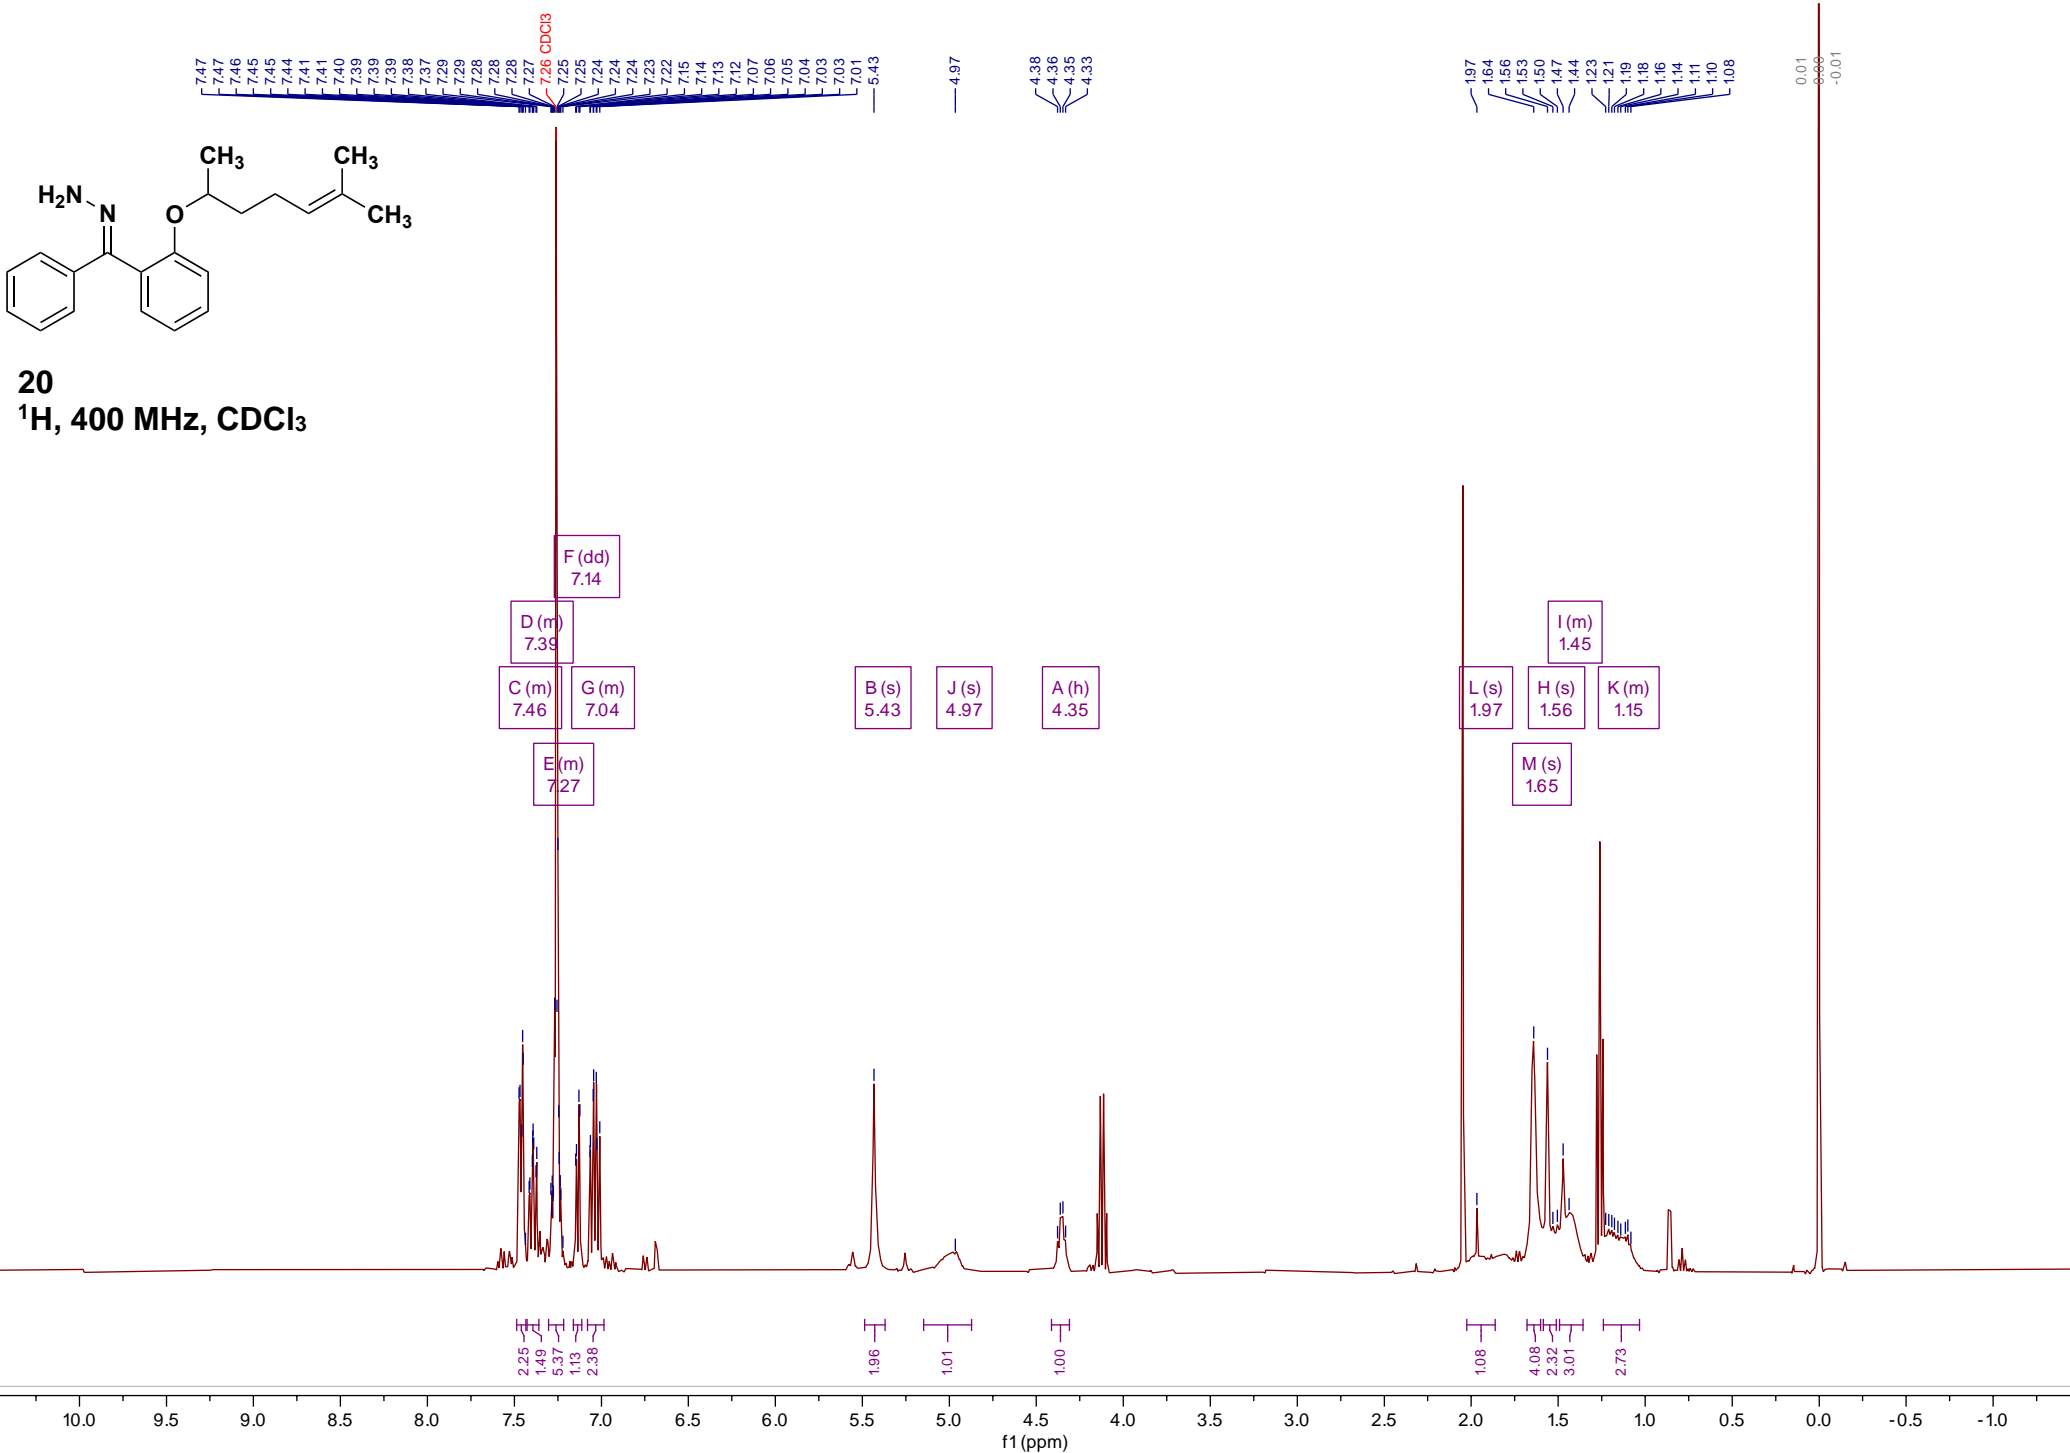



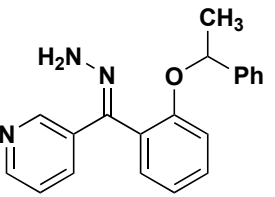

**16**  
<sup>1</sup>H, 400 MHz, CDCl<sub>3</sub>

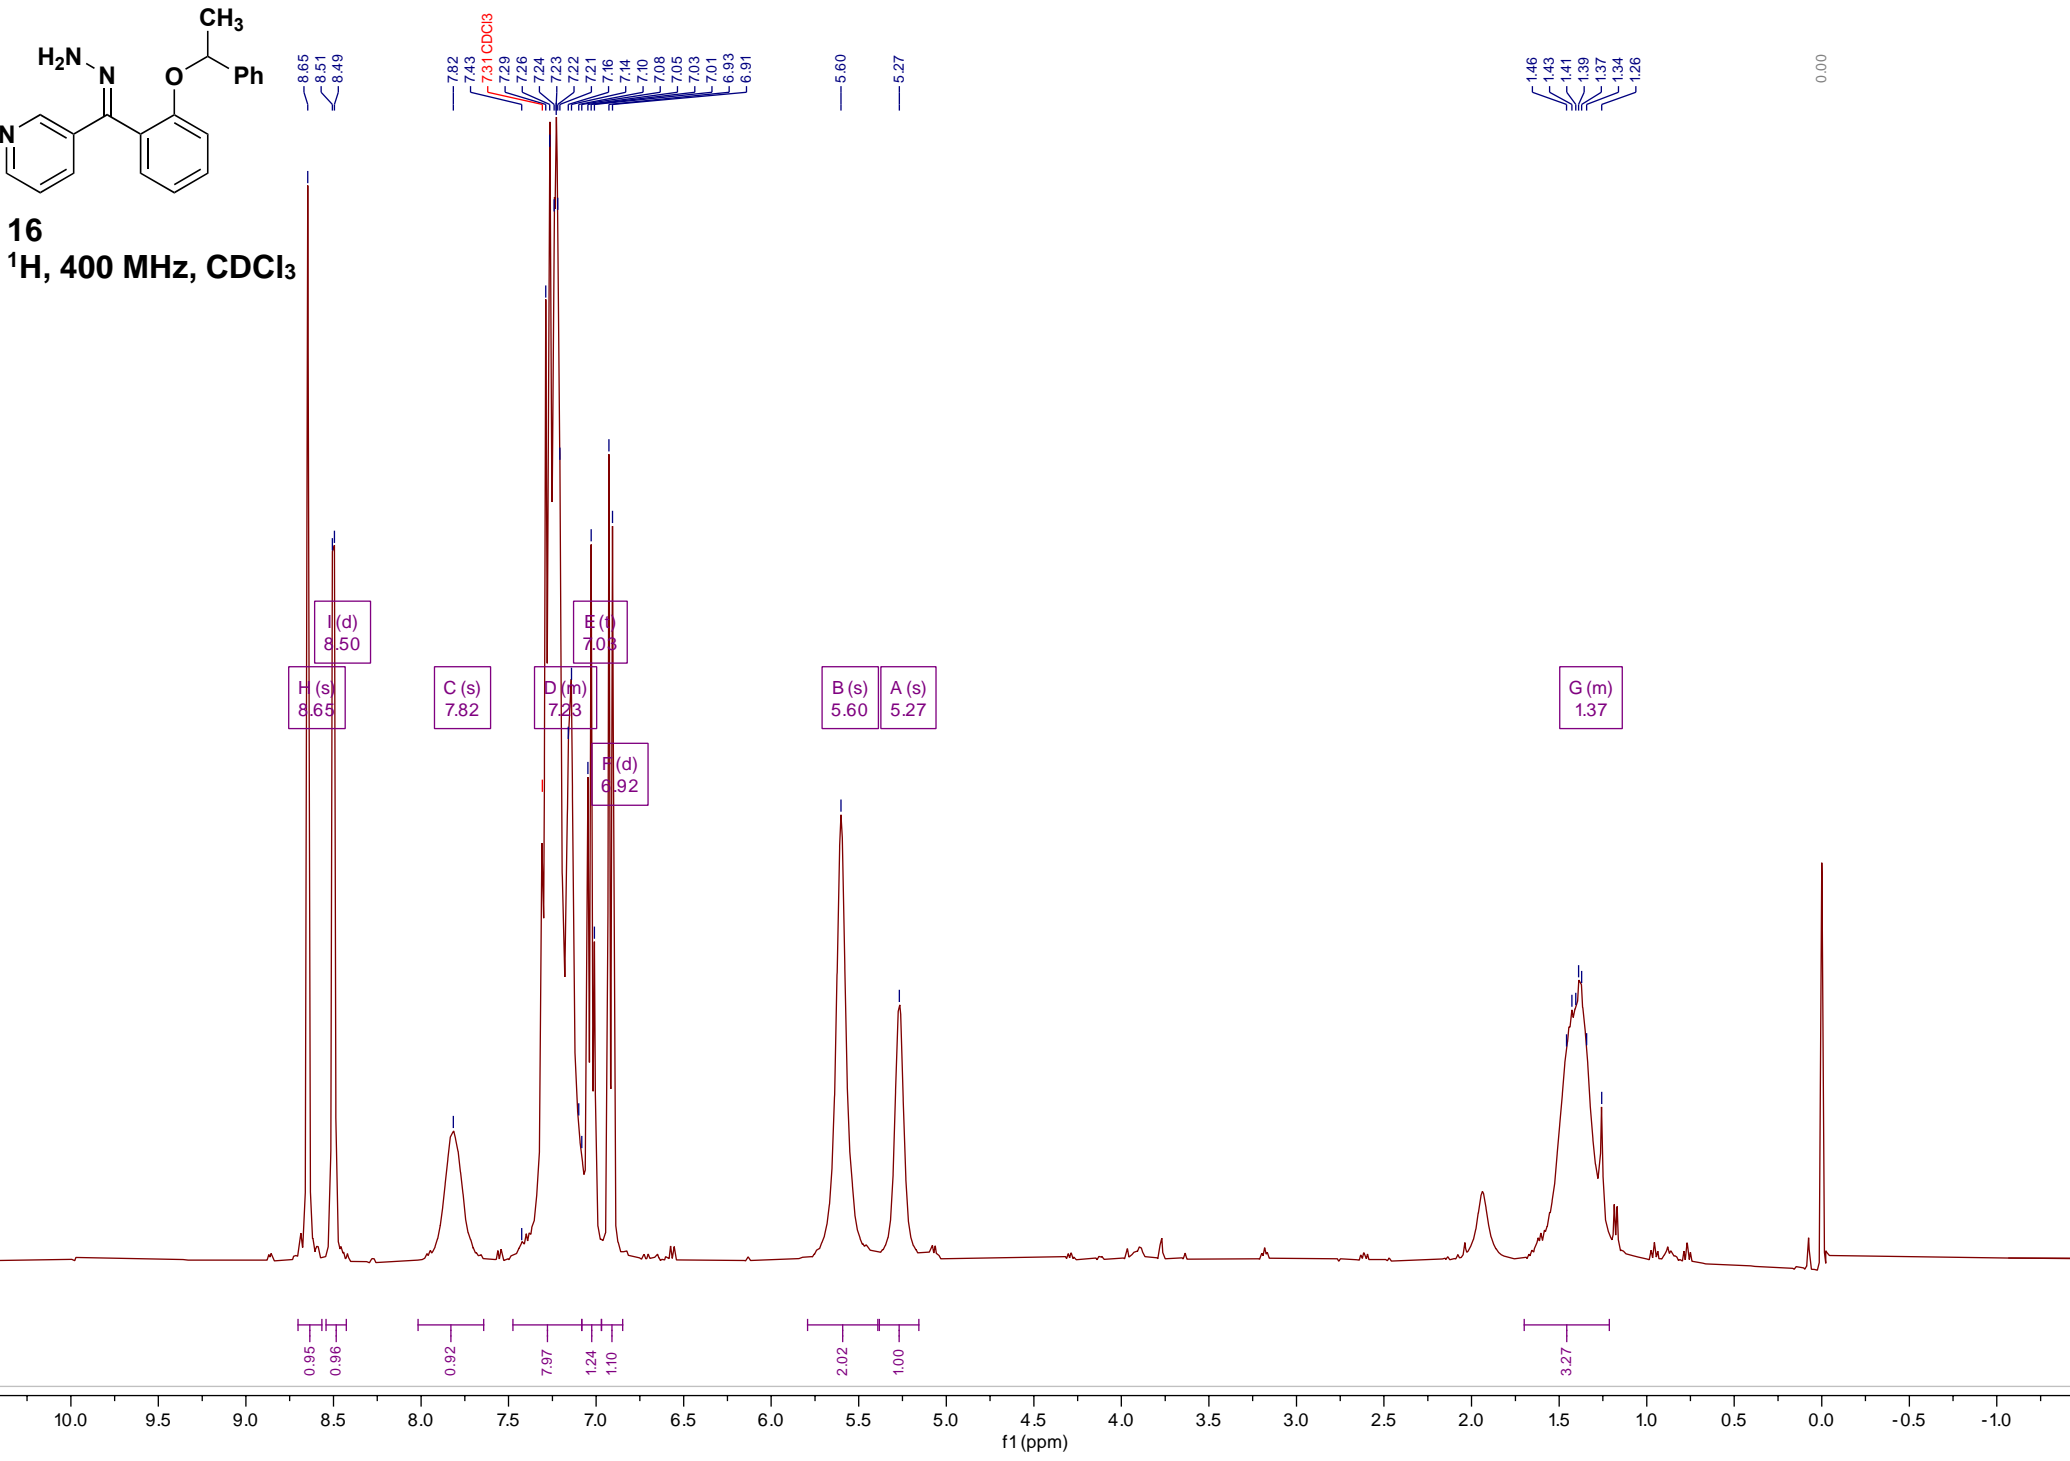

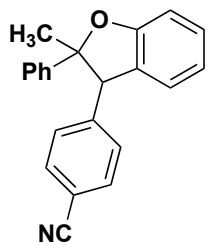

5a  
<sup>1</sup>H, 600 MHz, CDCl<sub>3</sub>

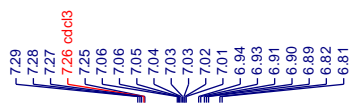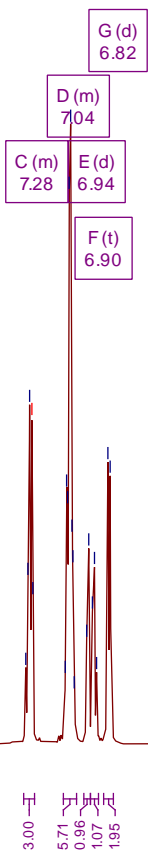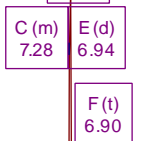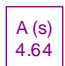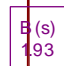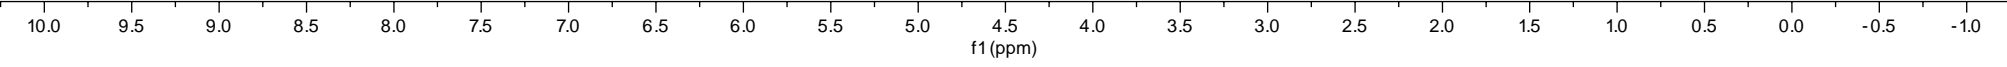

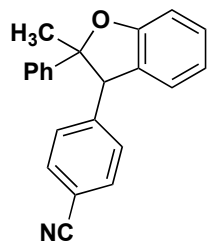

**5a**  
 $^{13}\text{C}$ , 150 MHz,  $\text{CDCl}_3$

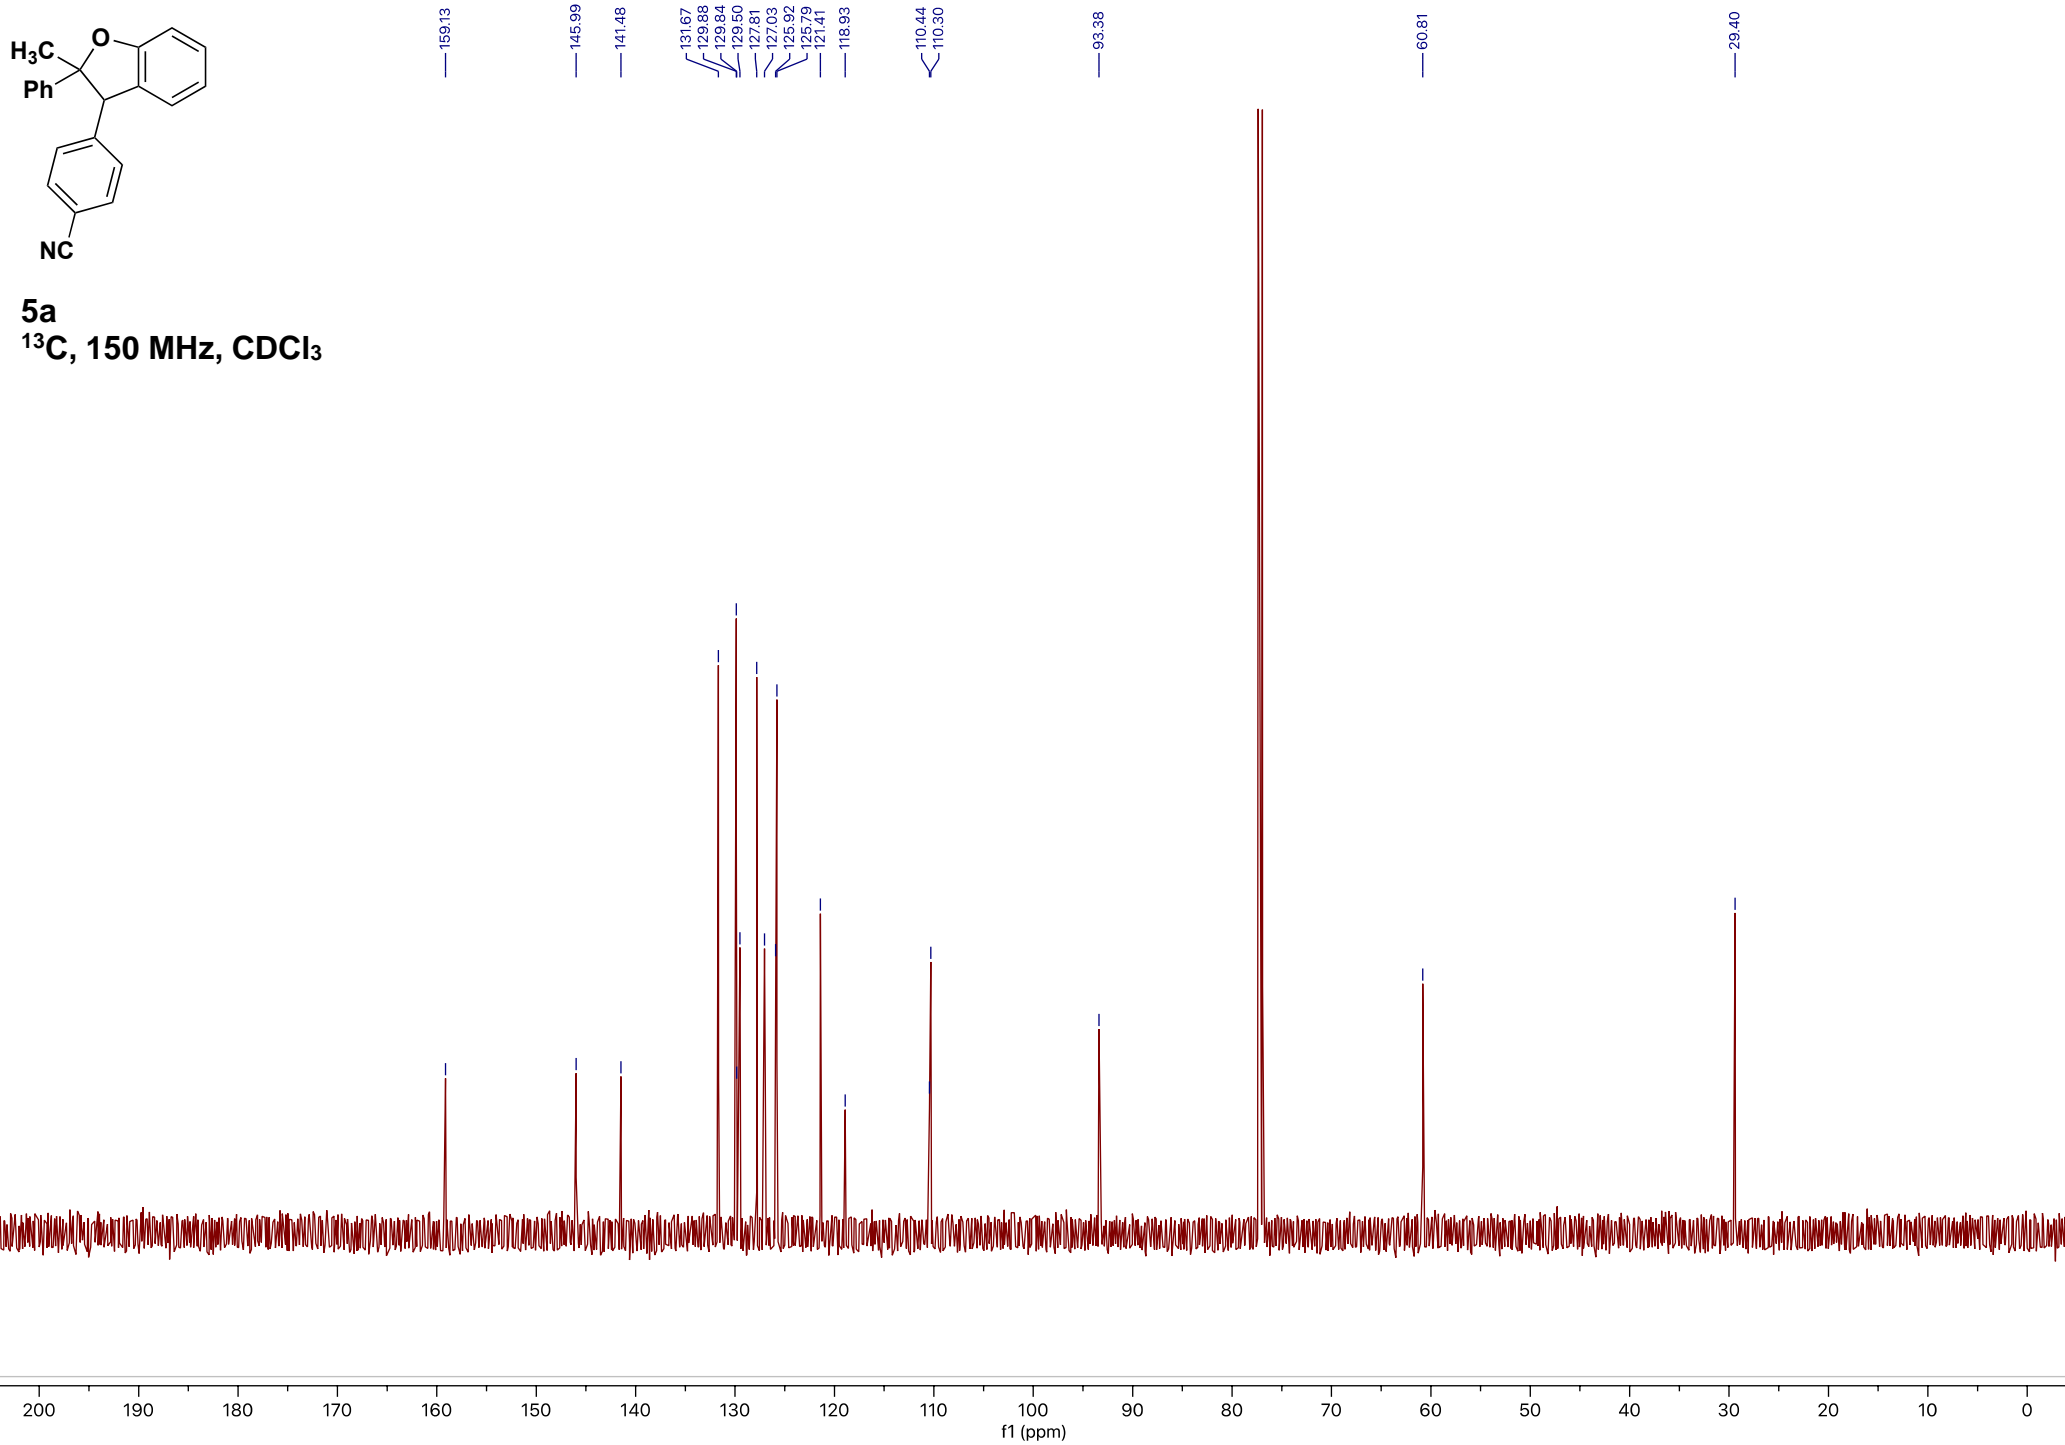

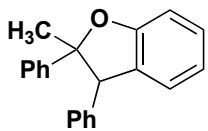

22  
<sup>1</sup>H, 400 MHz, CDCl<sub>3</sub>

7.25  
7.24 CDCl<sub>3</sub>  
7.23  
7.22  
7.03  
7.02  
7.01  
7.00  
6.99  
6.98  
6.97  
6.95  
6.89  
6.87  
6.85  
6.72  
6.71  
6.70

4.64

1.93

-0.00

D (t)  
6.87

E (t)  
7.24

C (m)  
6.71

F (m)  
6.99

A (s)  
4.64

E (s)  
1.93

1.30  
10.30  
1.16  
2.02

1.00

3.04

10.0 9.5 9.0 8.5 8.0 7.5 7.0 6.5 6.0 5.5 5.0 4.5 4.0 3.5 3.0 2.5 2.0 1.5 1.0 0.5 0.0 -0.5 -1.0

f1 (ppm)

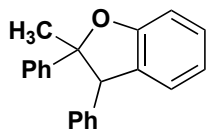

**22**  
**<sup>13</sup>C, 100 MHz, CDCl<sub>3</sub>**

169.37

142.17

139.85

130.97

129.34

128.88

128.54

127.87

127.42

126.74

126.54

126.05

121.07

109.79

93.50

77.48 CDCl<sub>3</sub>

77.16 CDCl<sub>3</sub>

76.84 CDCl<sub>3</sub>

61.11

29.40

200 190 180 170 160 150 140 130 120 110 100 90 80 70 60 50 40 30 20 10 0

f1 (ppm)

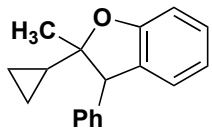

**24**  
<sup>1</sup>H, 600 MHz, CDCl<sub>3</sub>

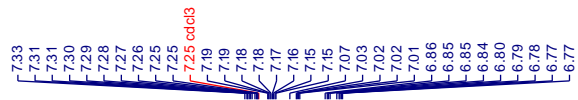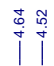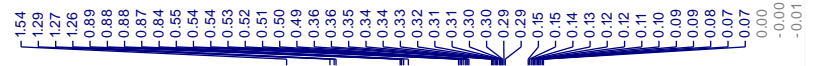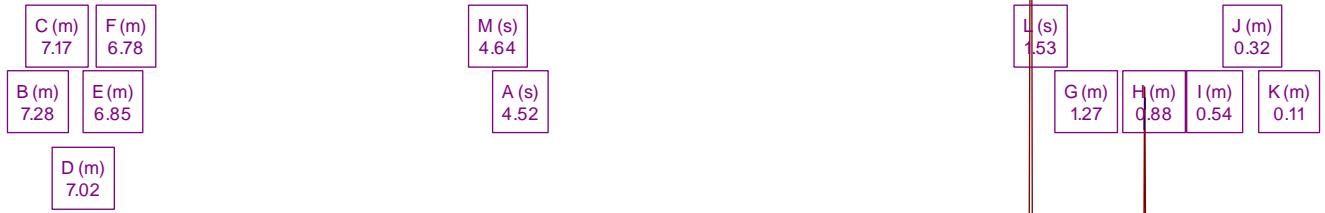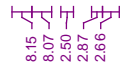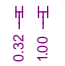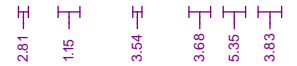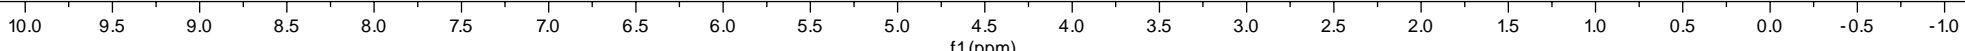

**Note:** Spectra is a mix of diastereomers, with the minor and major diastereomer peaks that can be assigned reported in the text above.

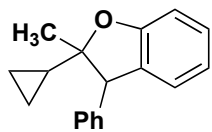

**24**  
<sup>13</sup>C, 150 MHz, CDCl<sub>3</sub>

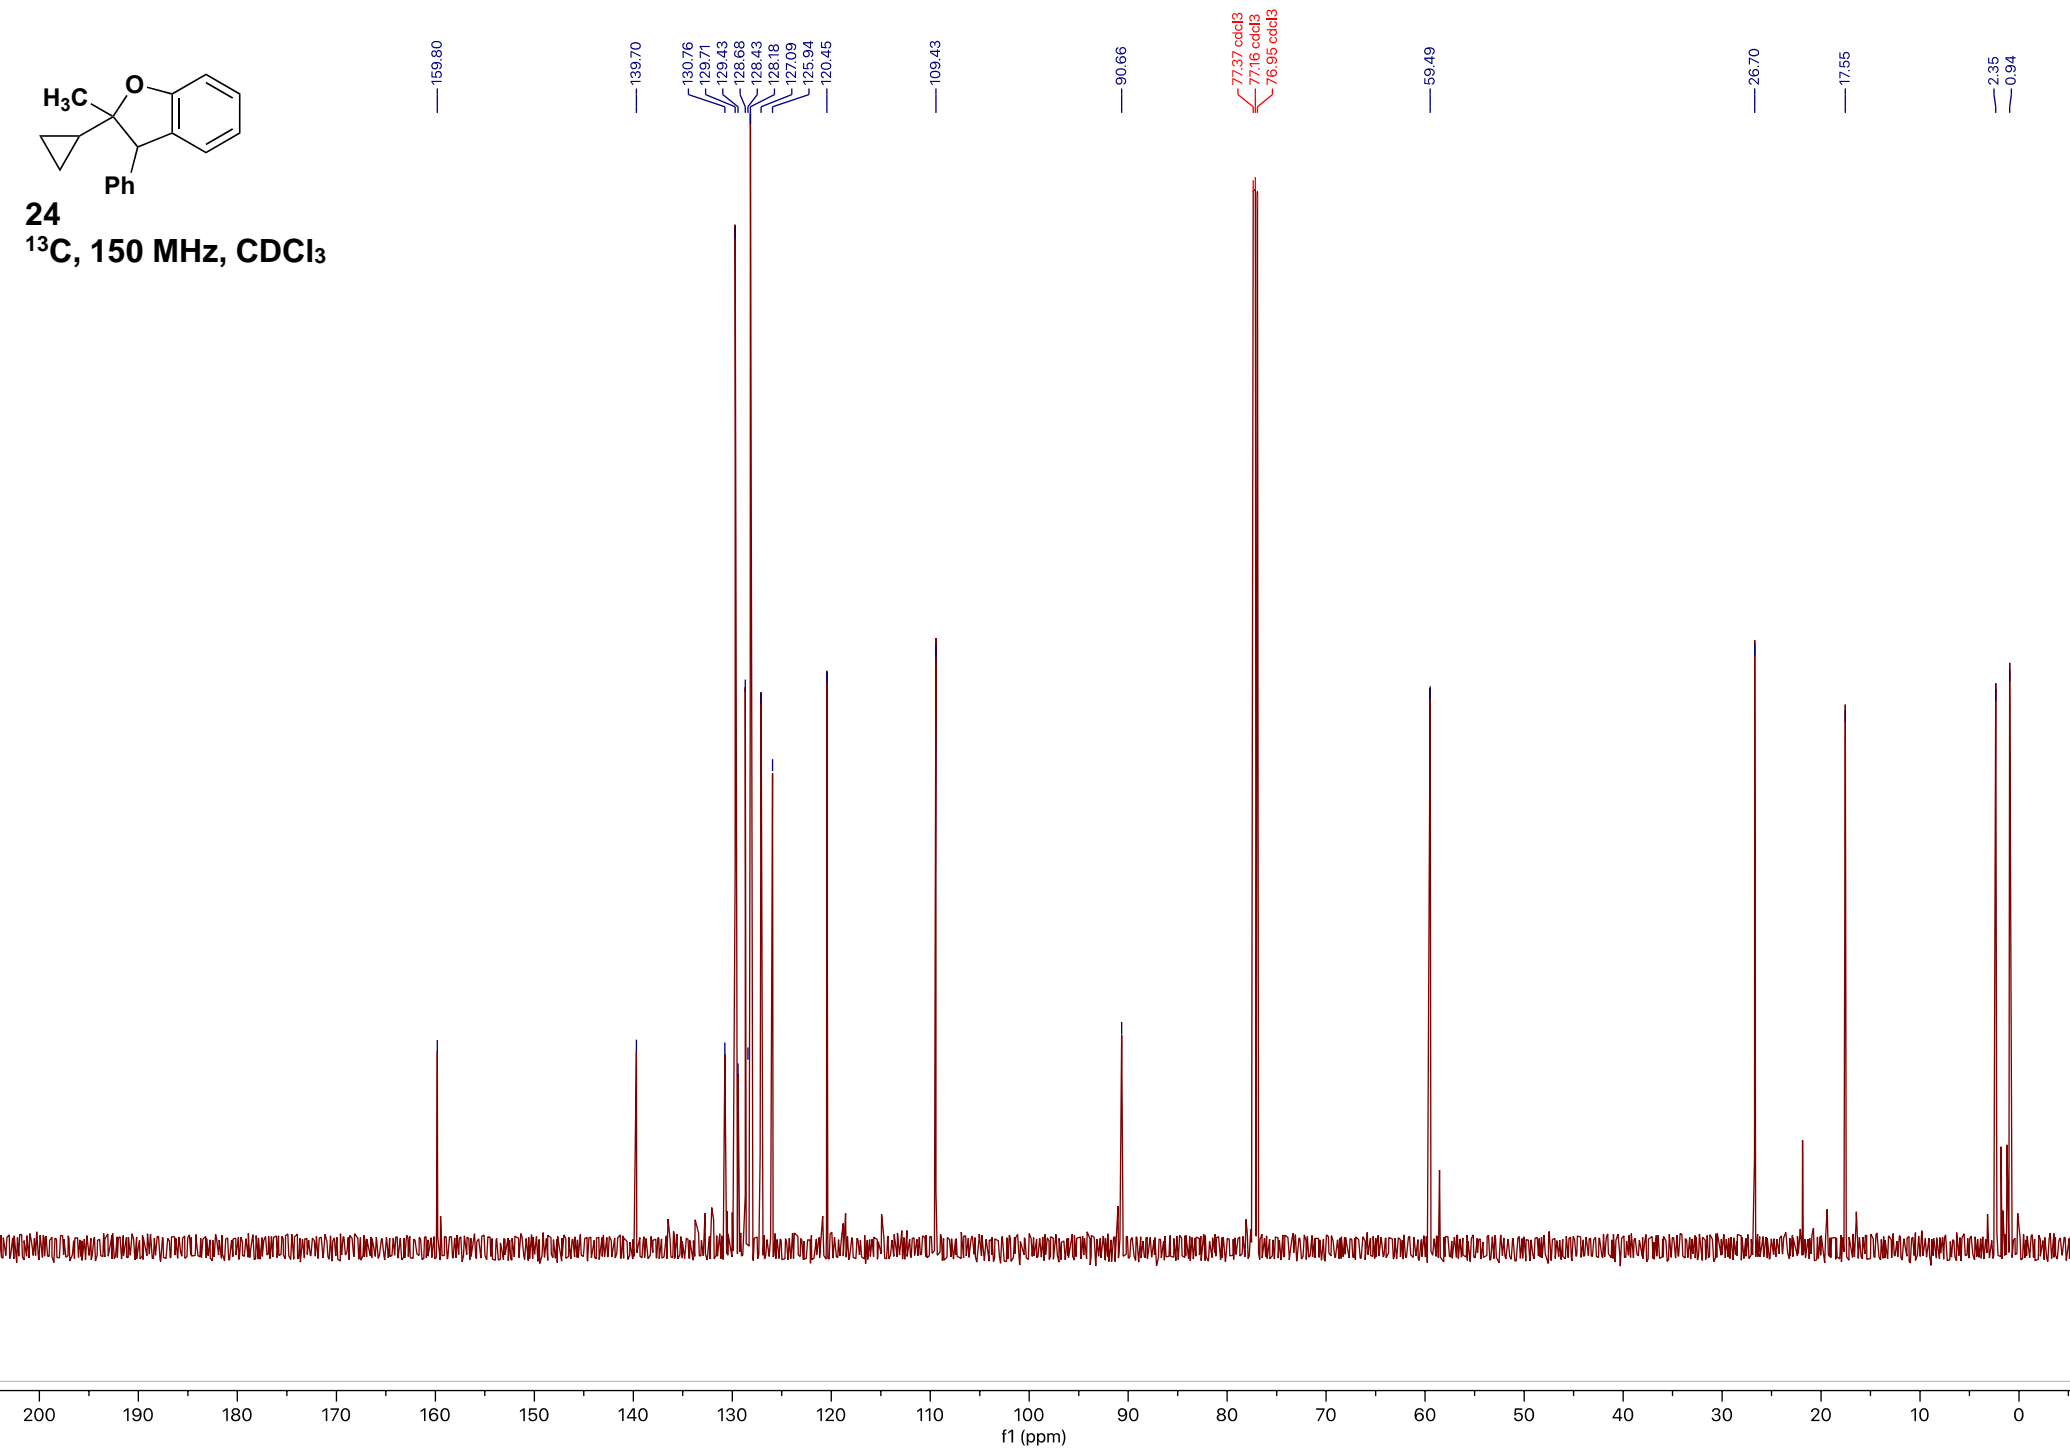

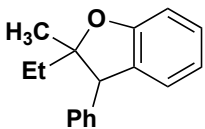

21  
<sup>1</sup>H, 400 MHz, CDCl<sub>3</sub>

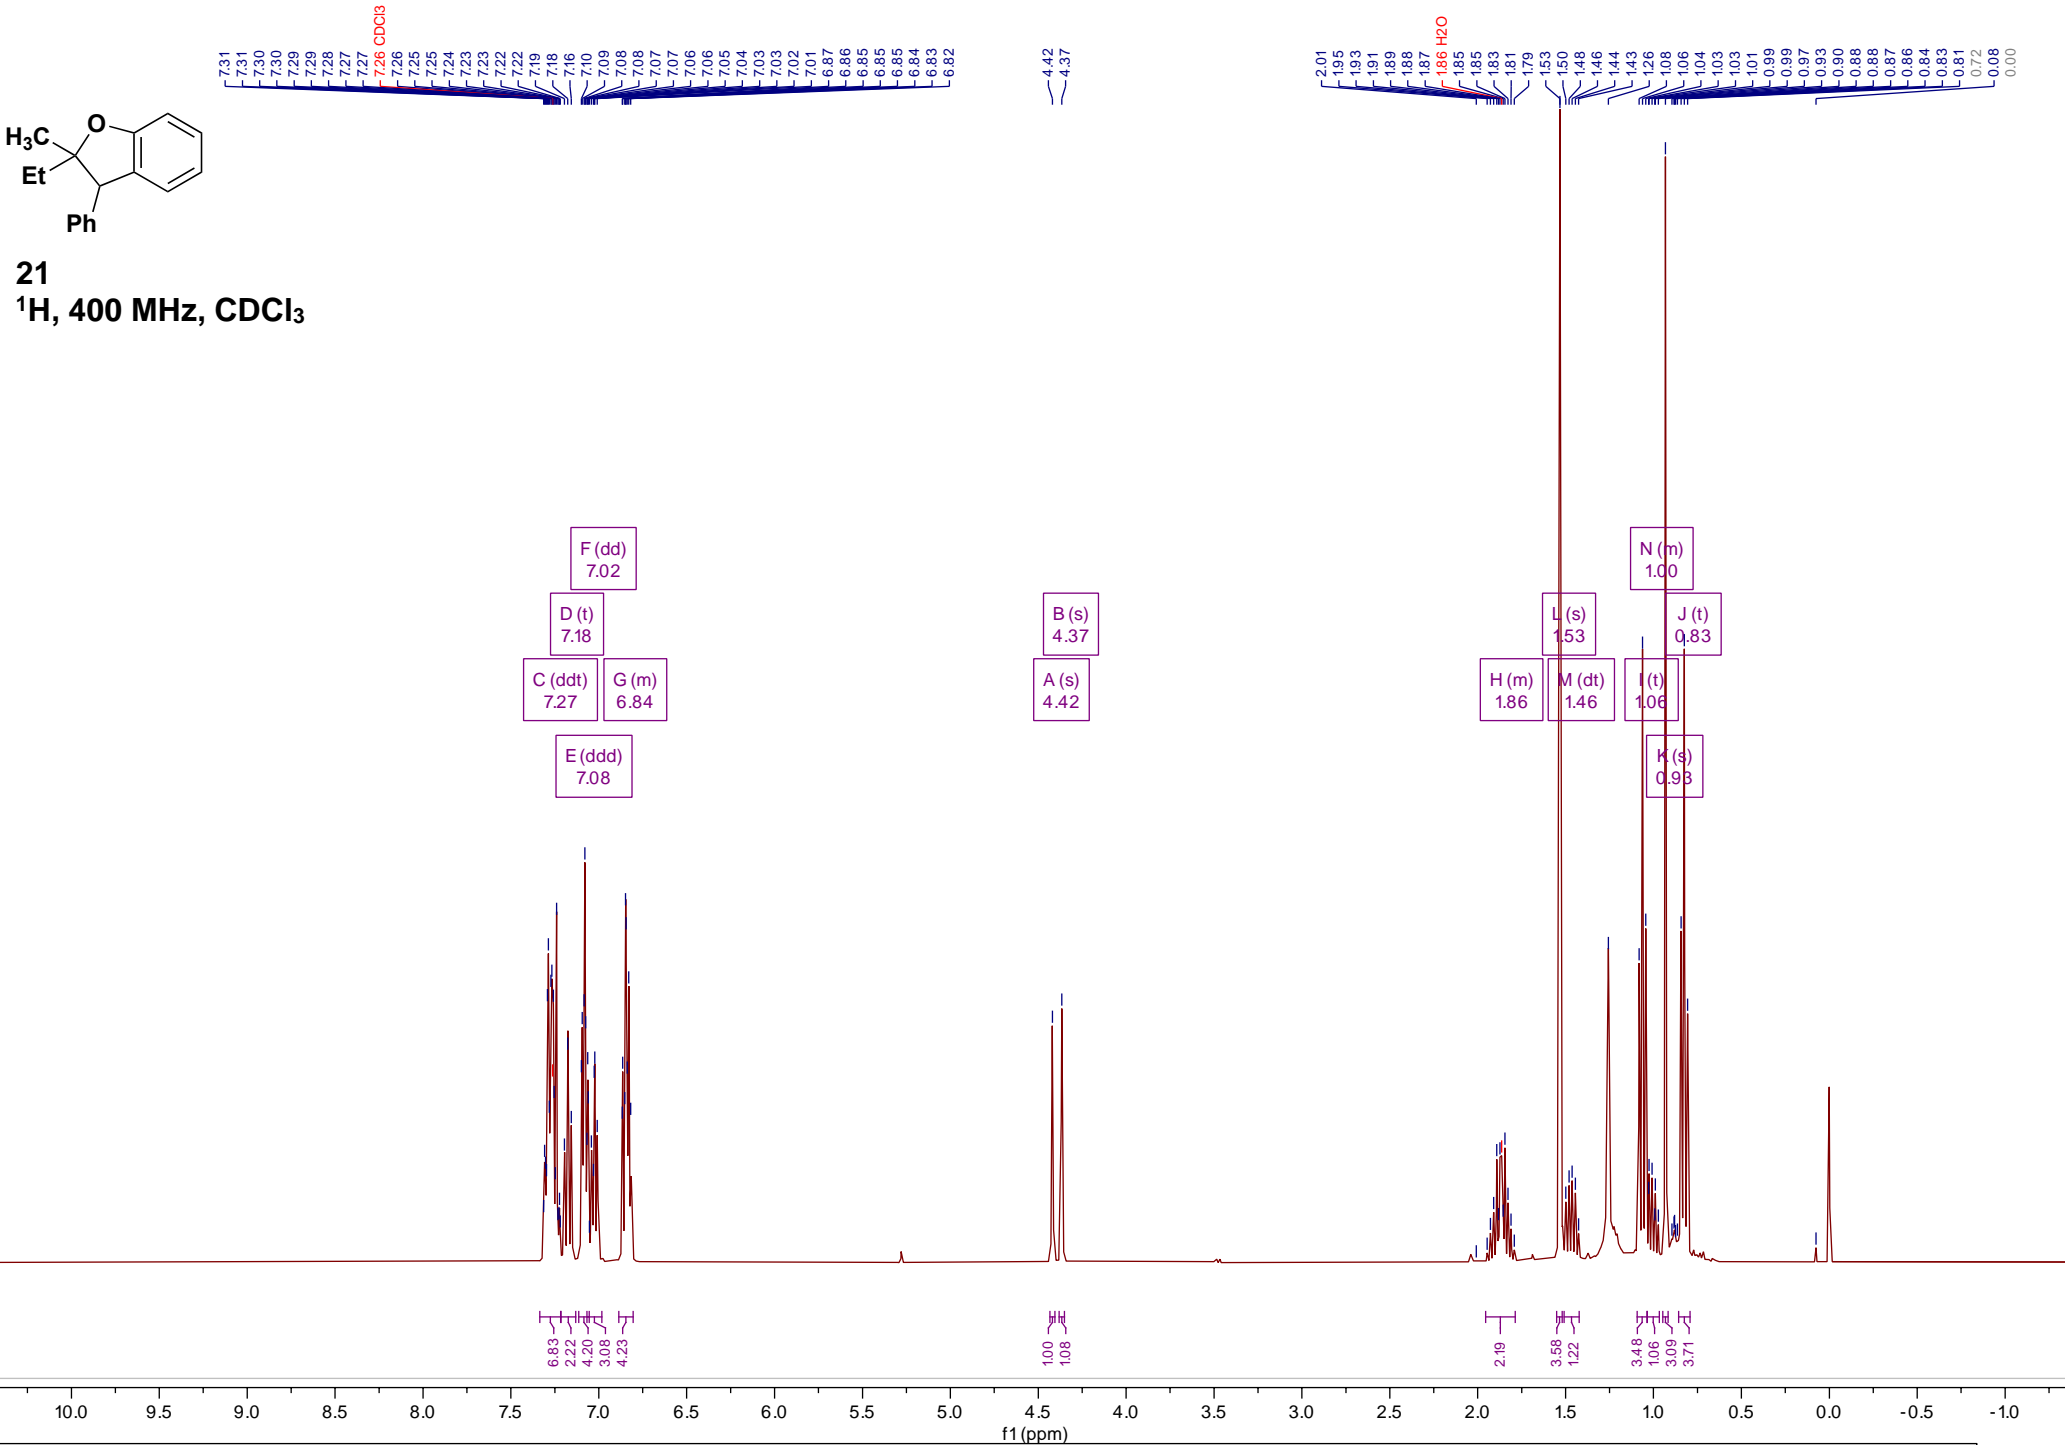

**Note:** Spectra is a mix of diastereomers, with the minor and major diastereomer peaks that can be assigned reported in the text above.



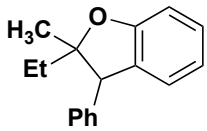

**21**  
**<sup>13</sup>C, 100 MHz, CDCl<sub>3</sub>**

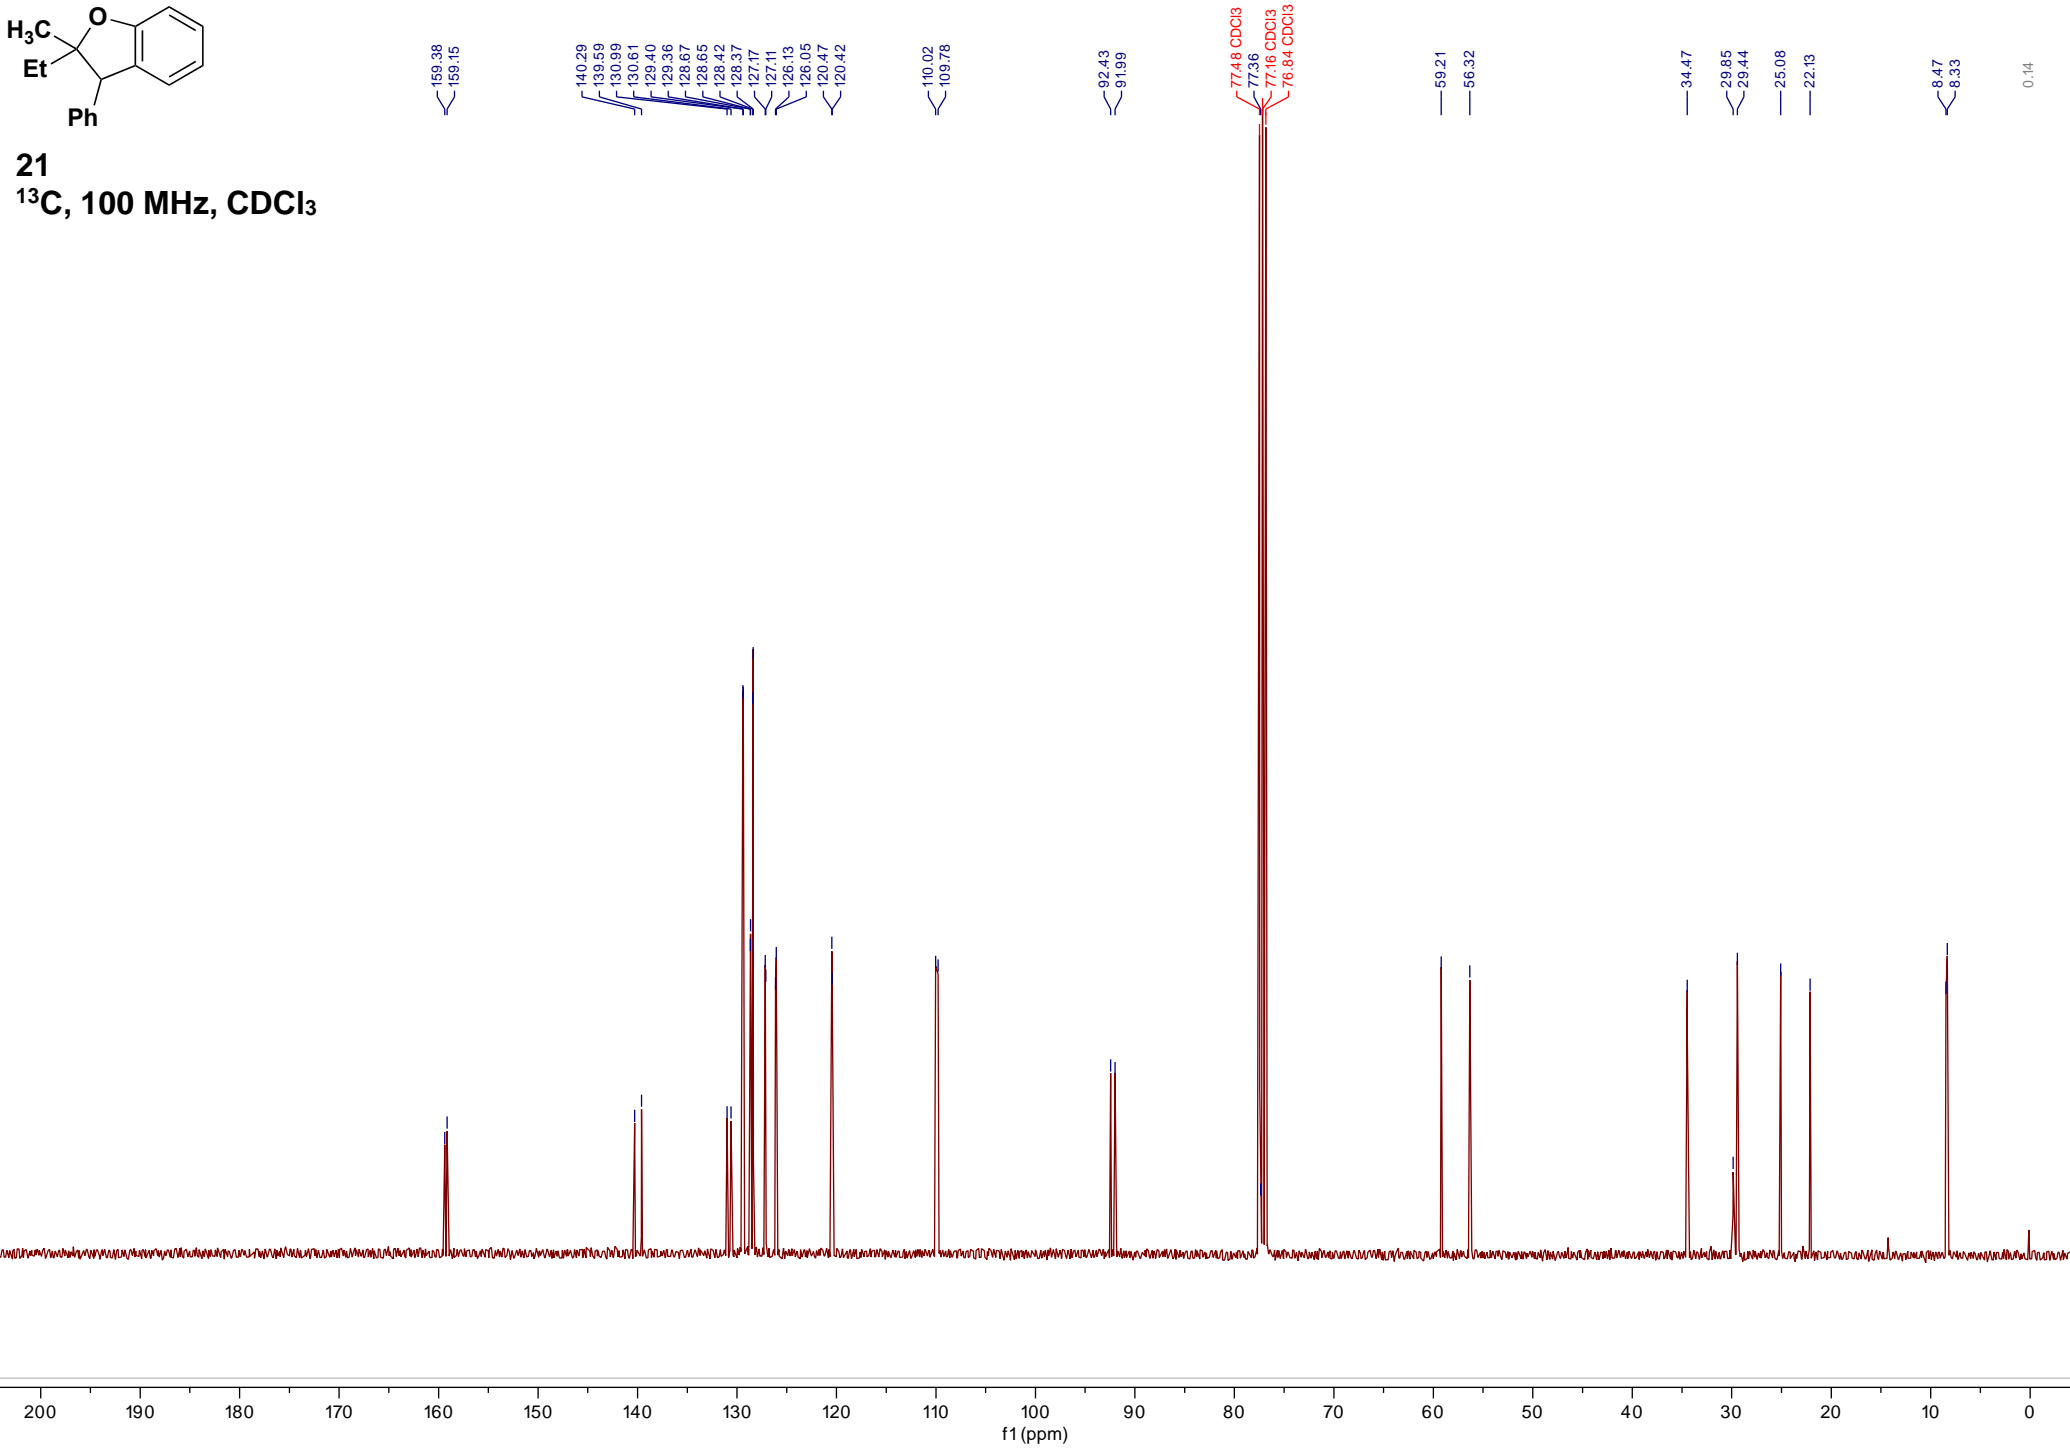

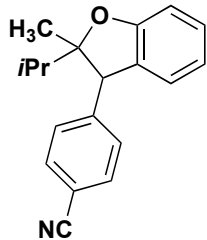

**25**  
<sup>1</sup>H, 600 MHz, CDCl<sub>3</sub>

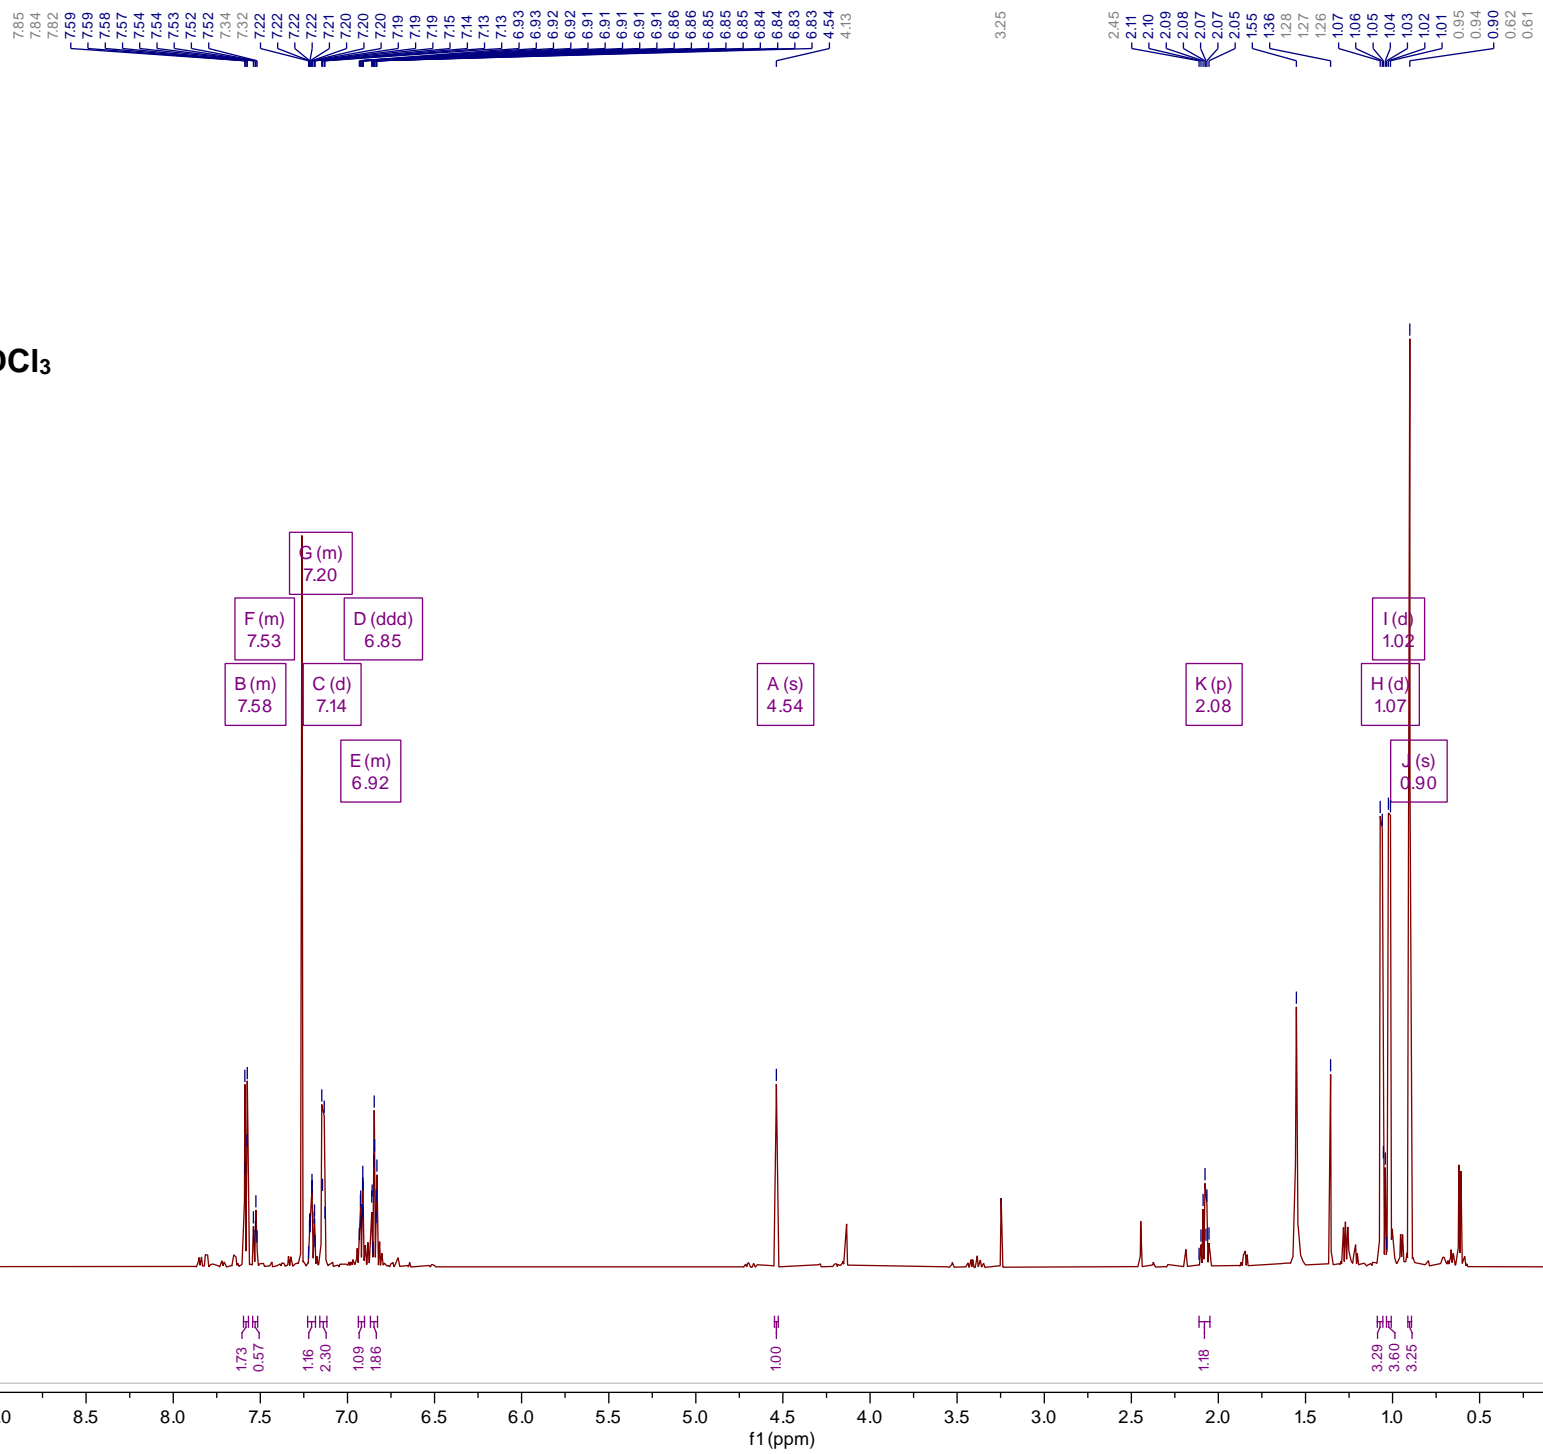

**Note:** Peaks in grey correspond to the minor diastereomer (81:19 dr in this spectra), with the diagnostic peaks reported in the main text with the compound.

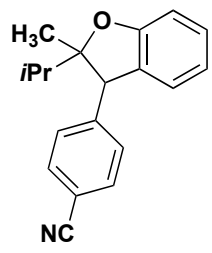

**25**  
**<sup>13</sup>C, 100 MHz, CDCl<sub>3</sub>**

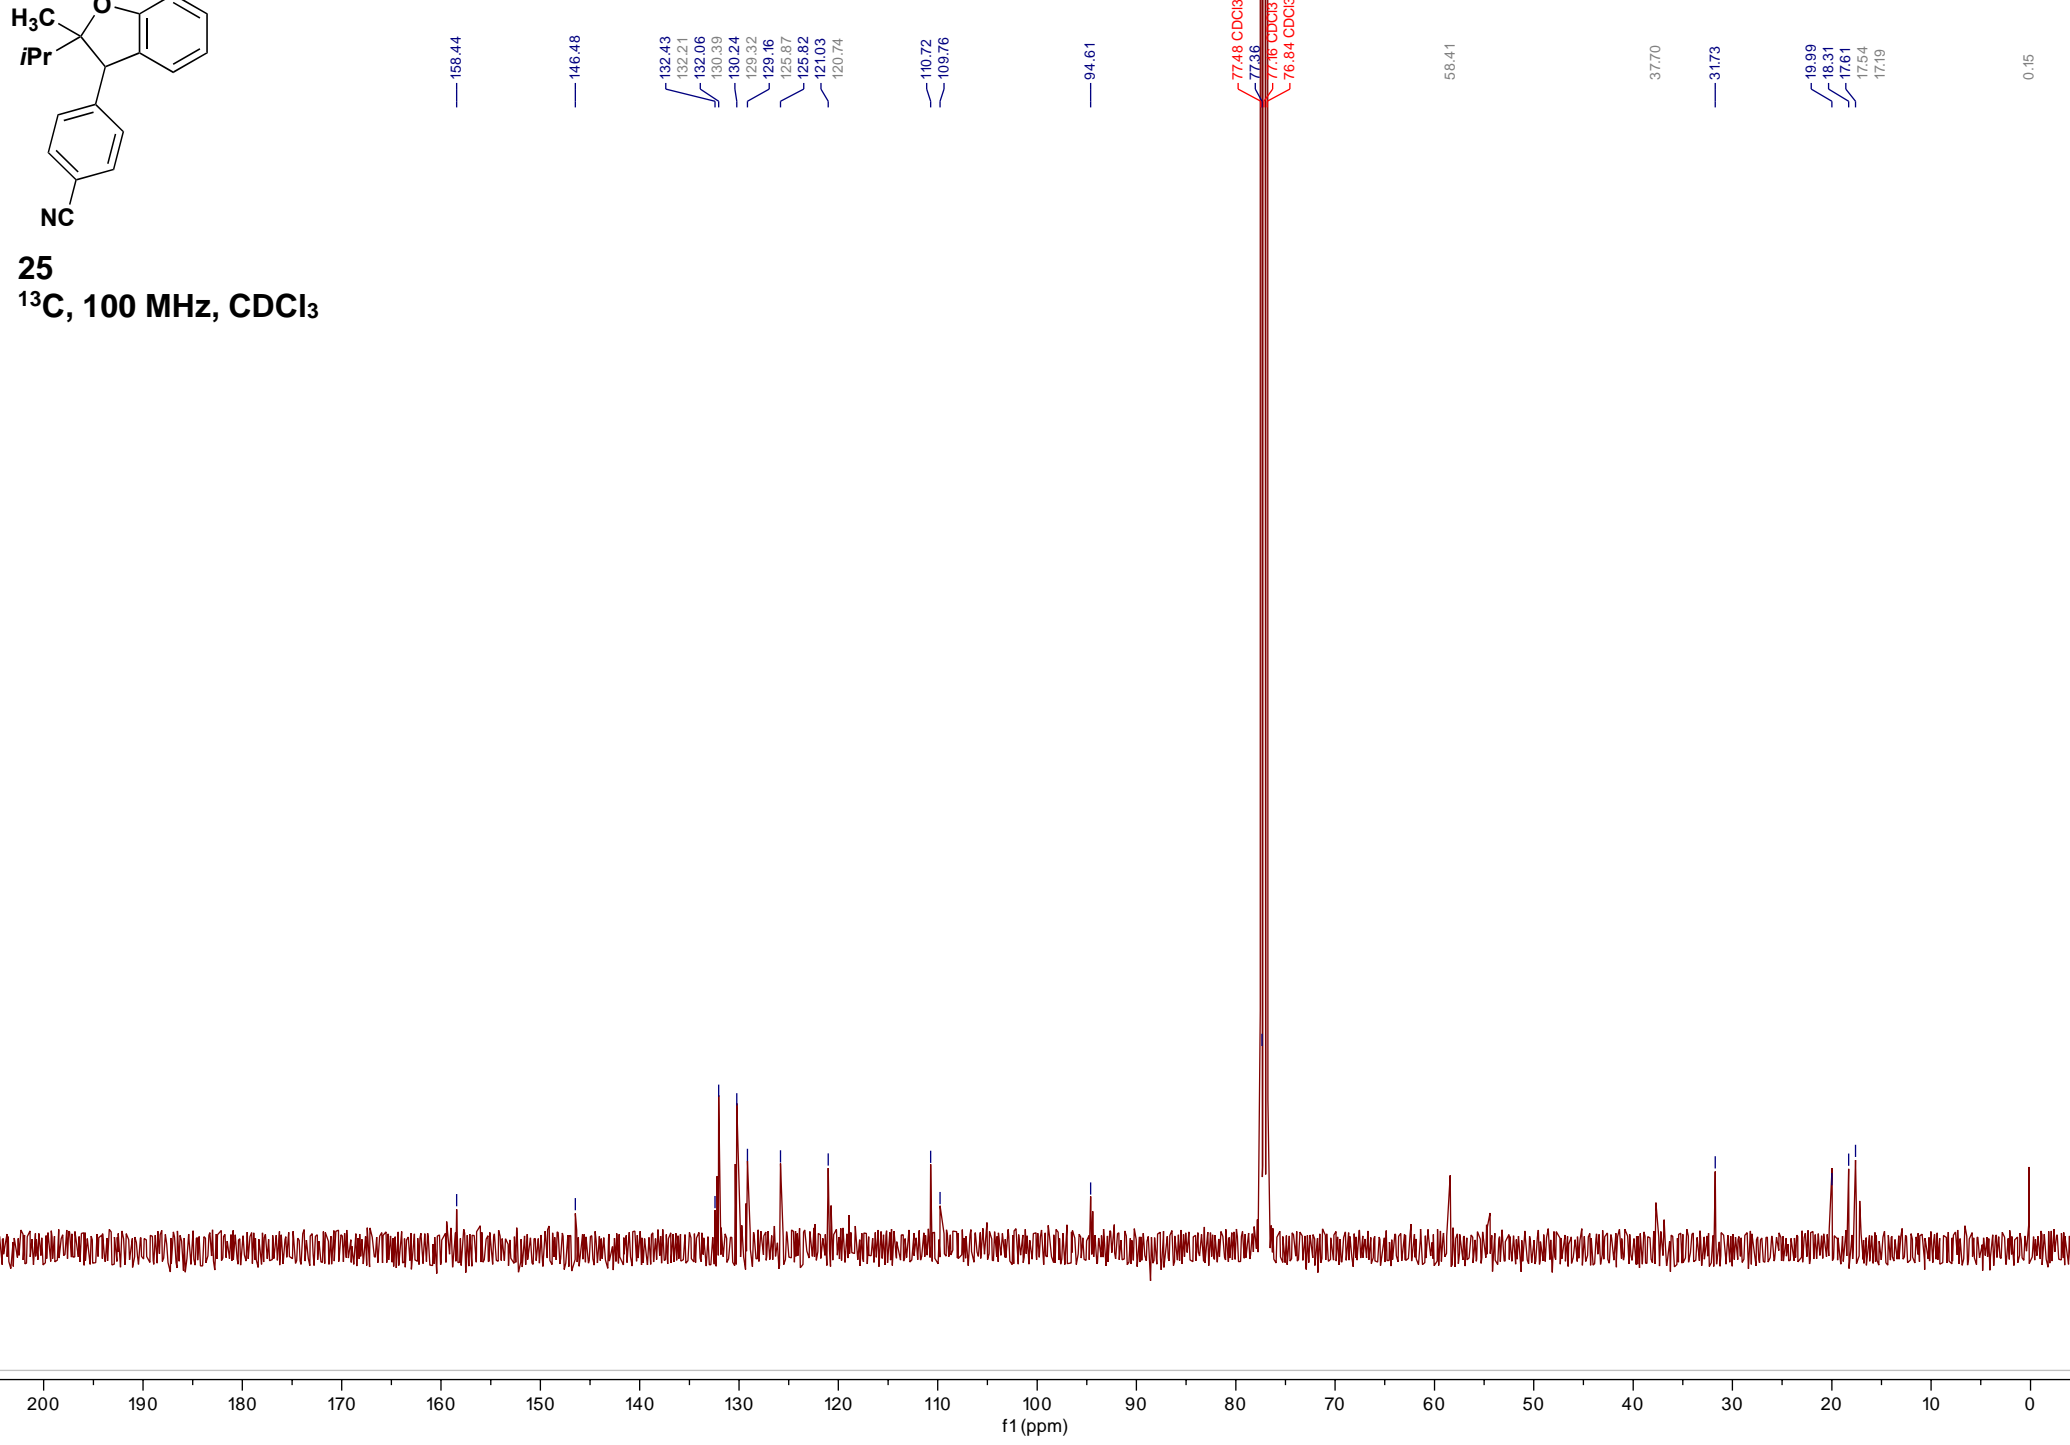

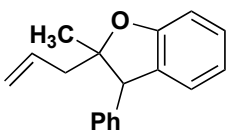

**6**  
<sup>1</sup>H, 600 MHz, CDCl<sub>3</sub>

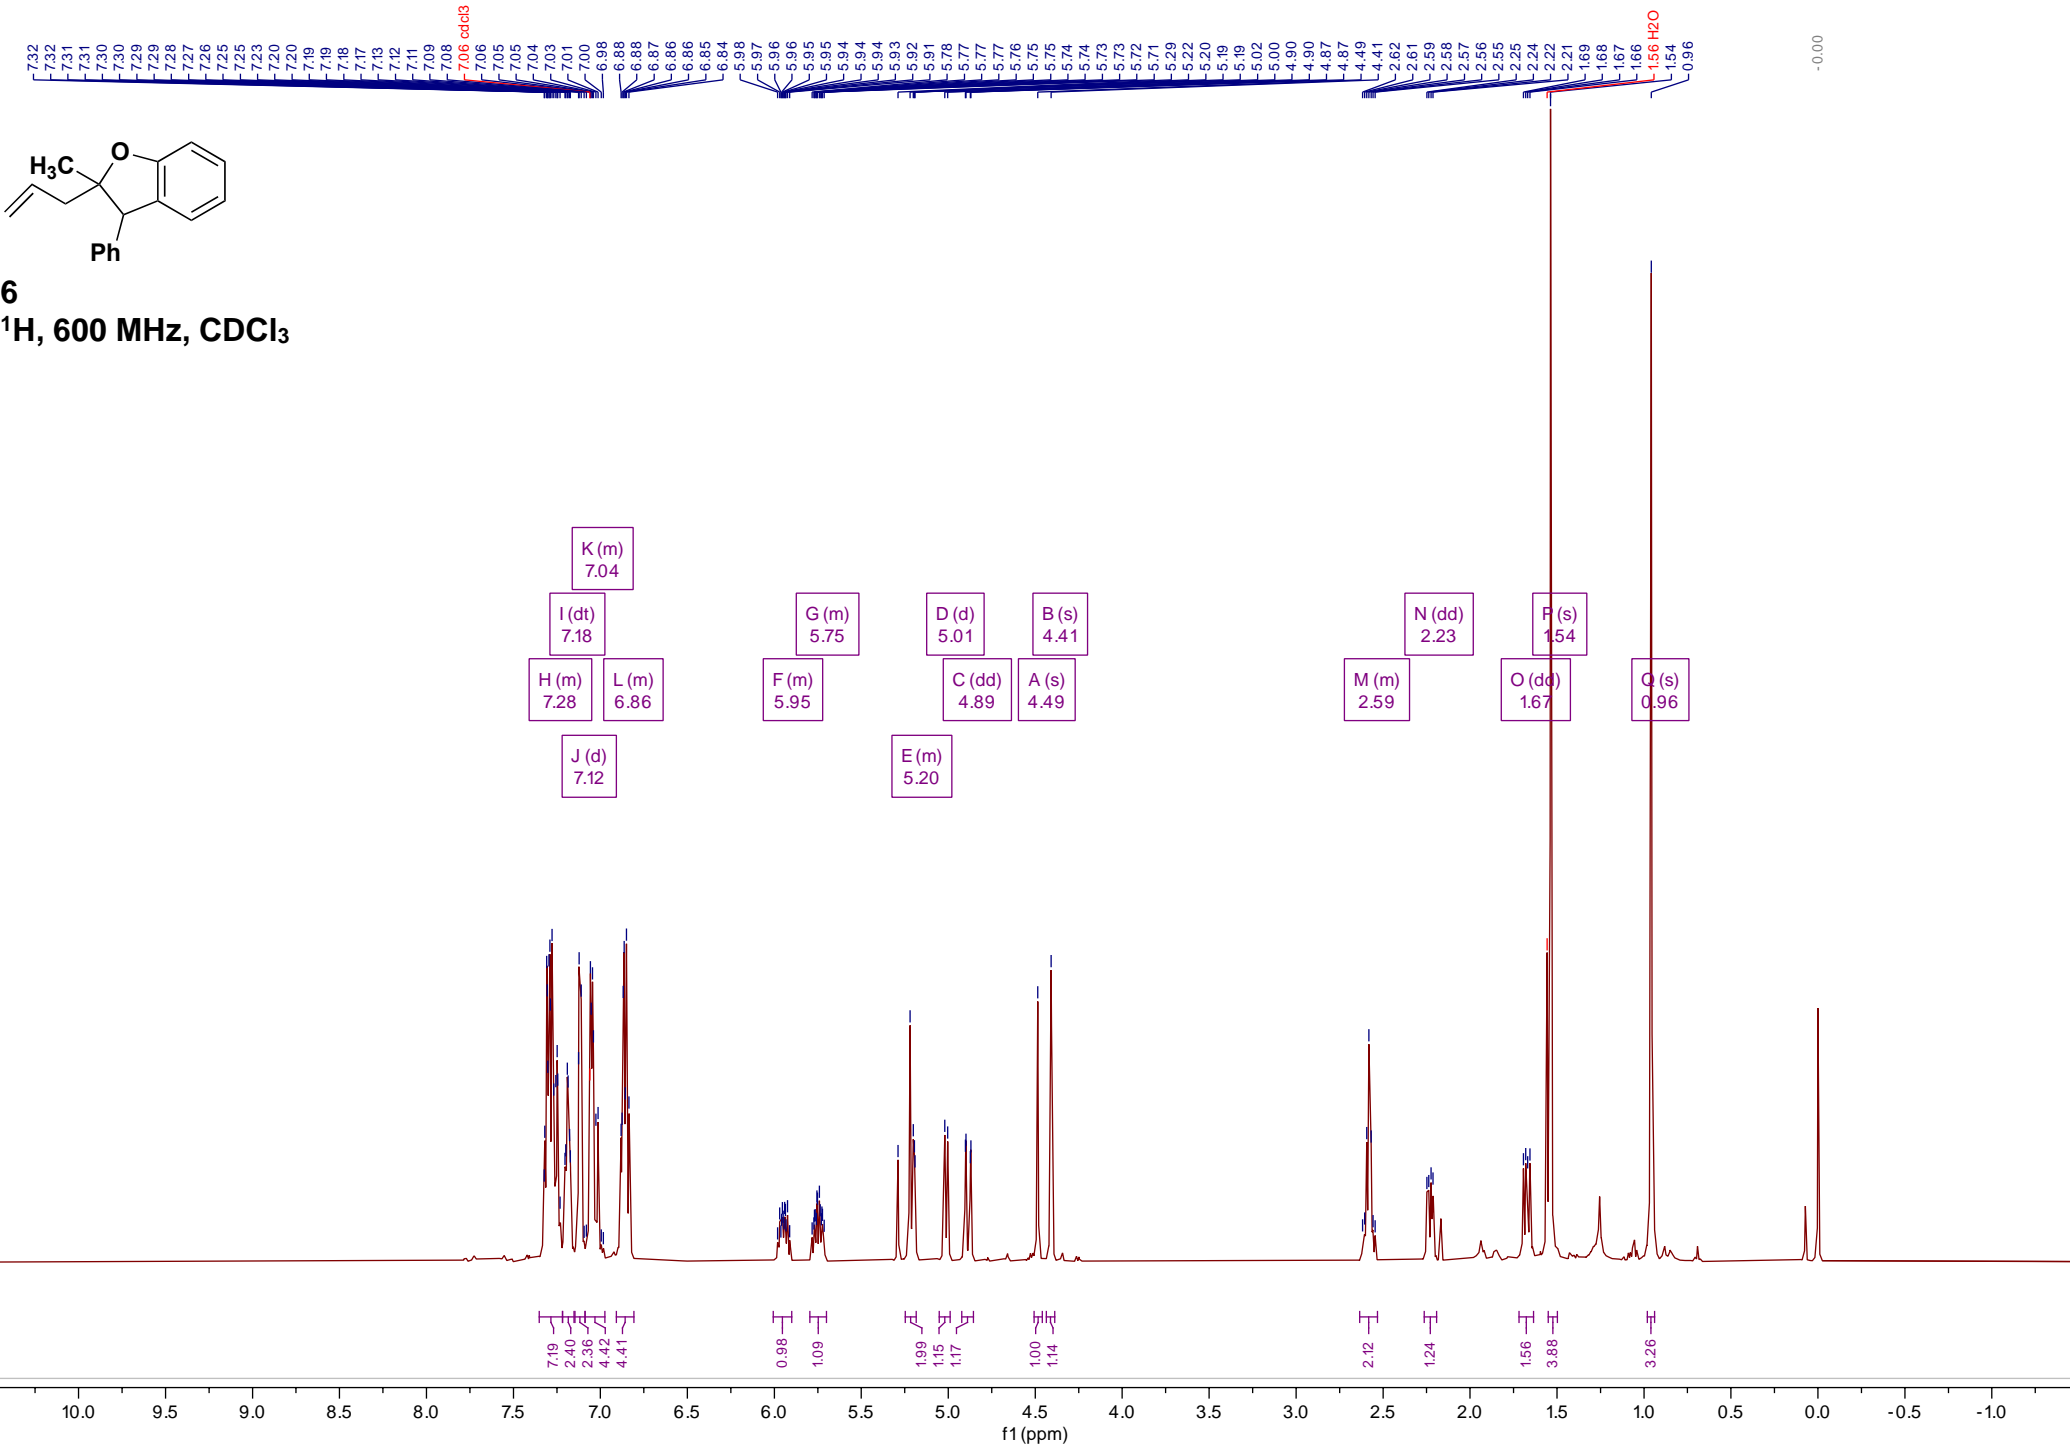

**Note:** Spectra is a mix of diastereomers, with the minor and major diastereomer peaks that can be assigned reported in the text above.



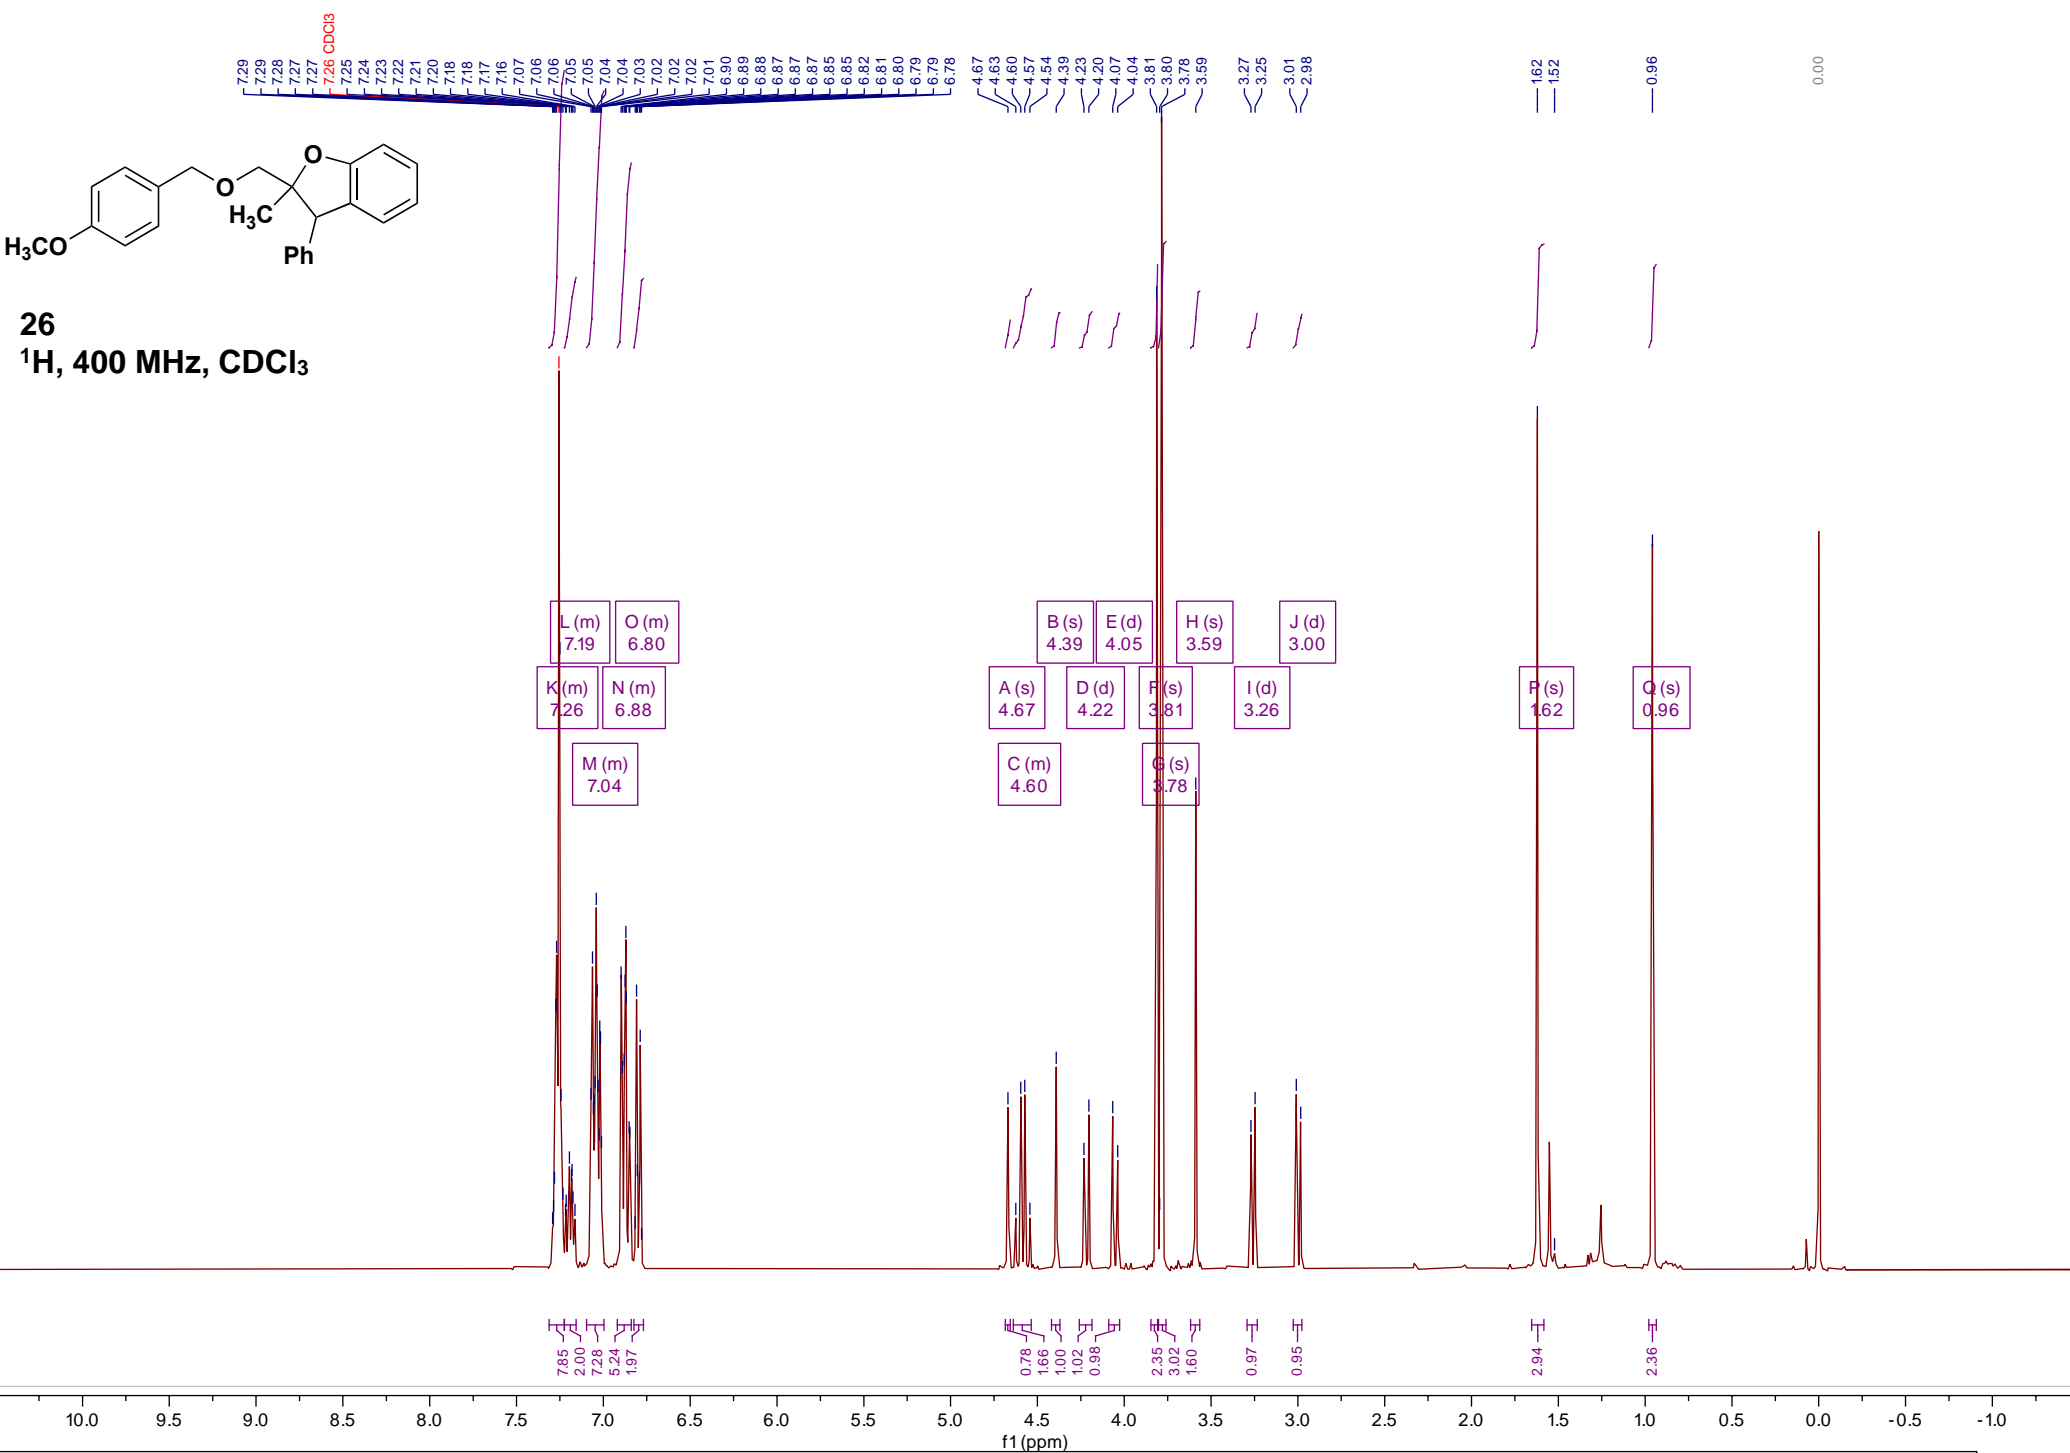

**Note:** Spectra is a mix of diastereomers, with the minor and major diastereomer peaks that can be assigned reported in the text above.

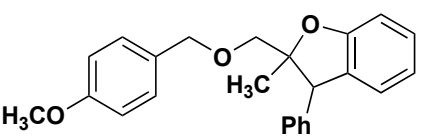

**26**  
**<sup>13</sup>C, 100 MHz, CDCl<sub>3</sub>**

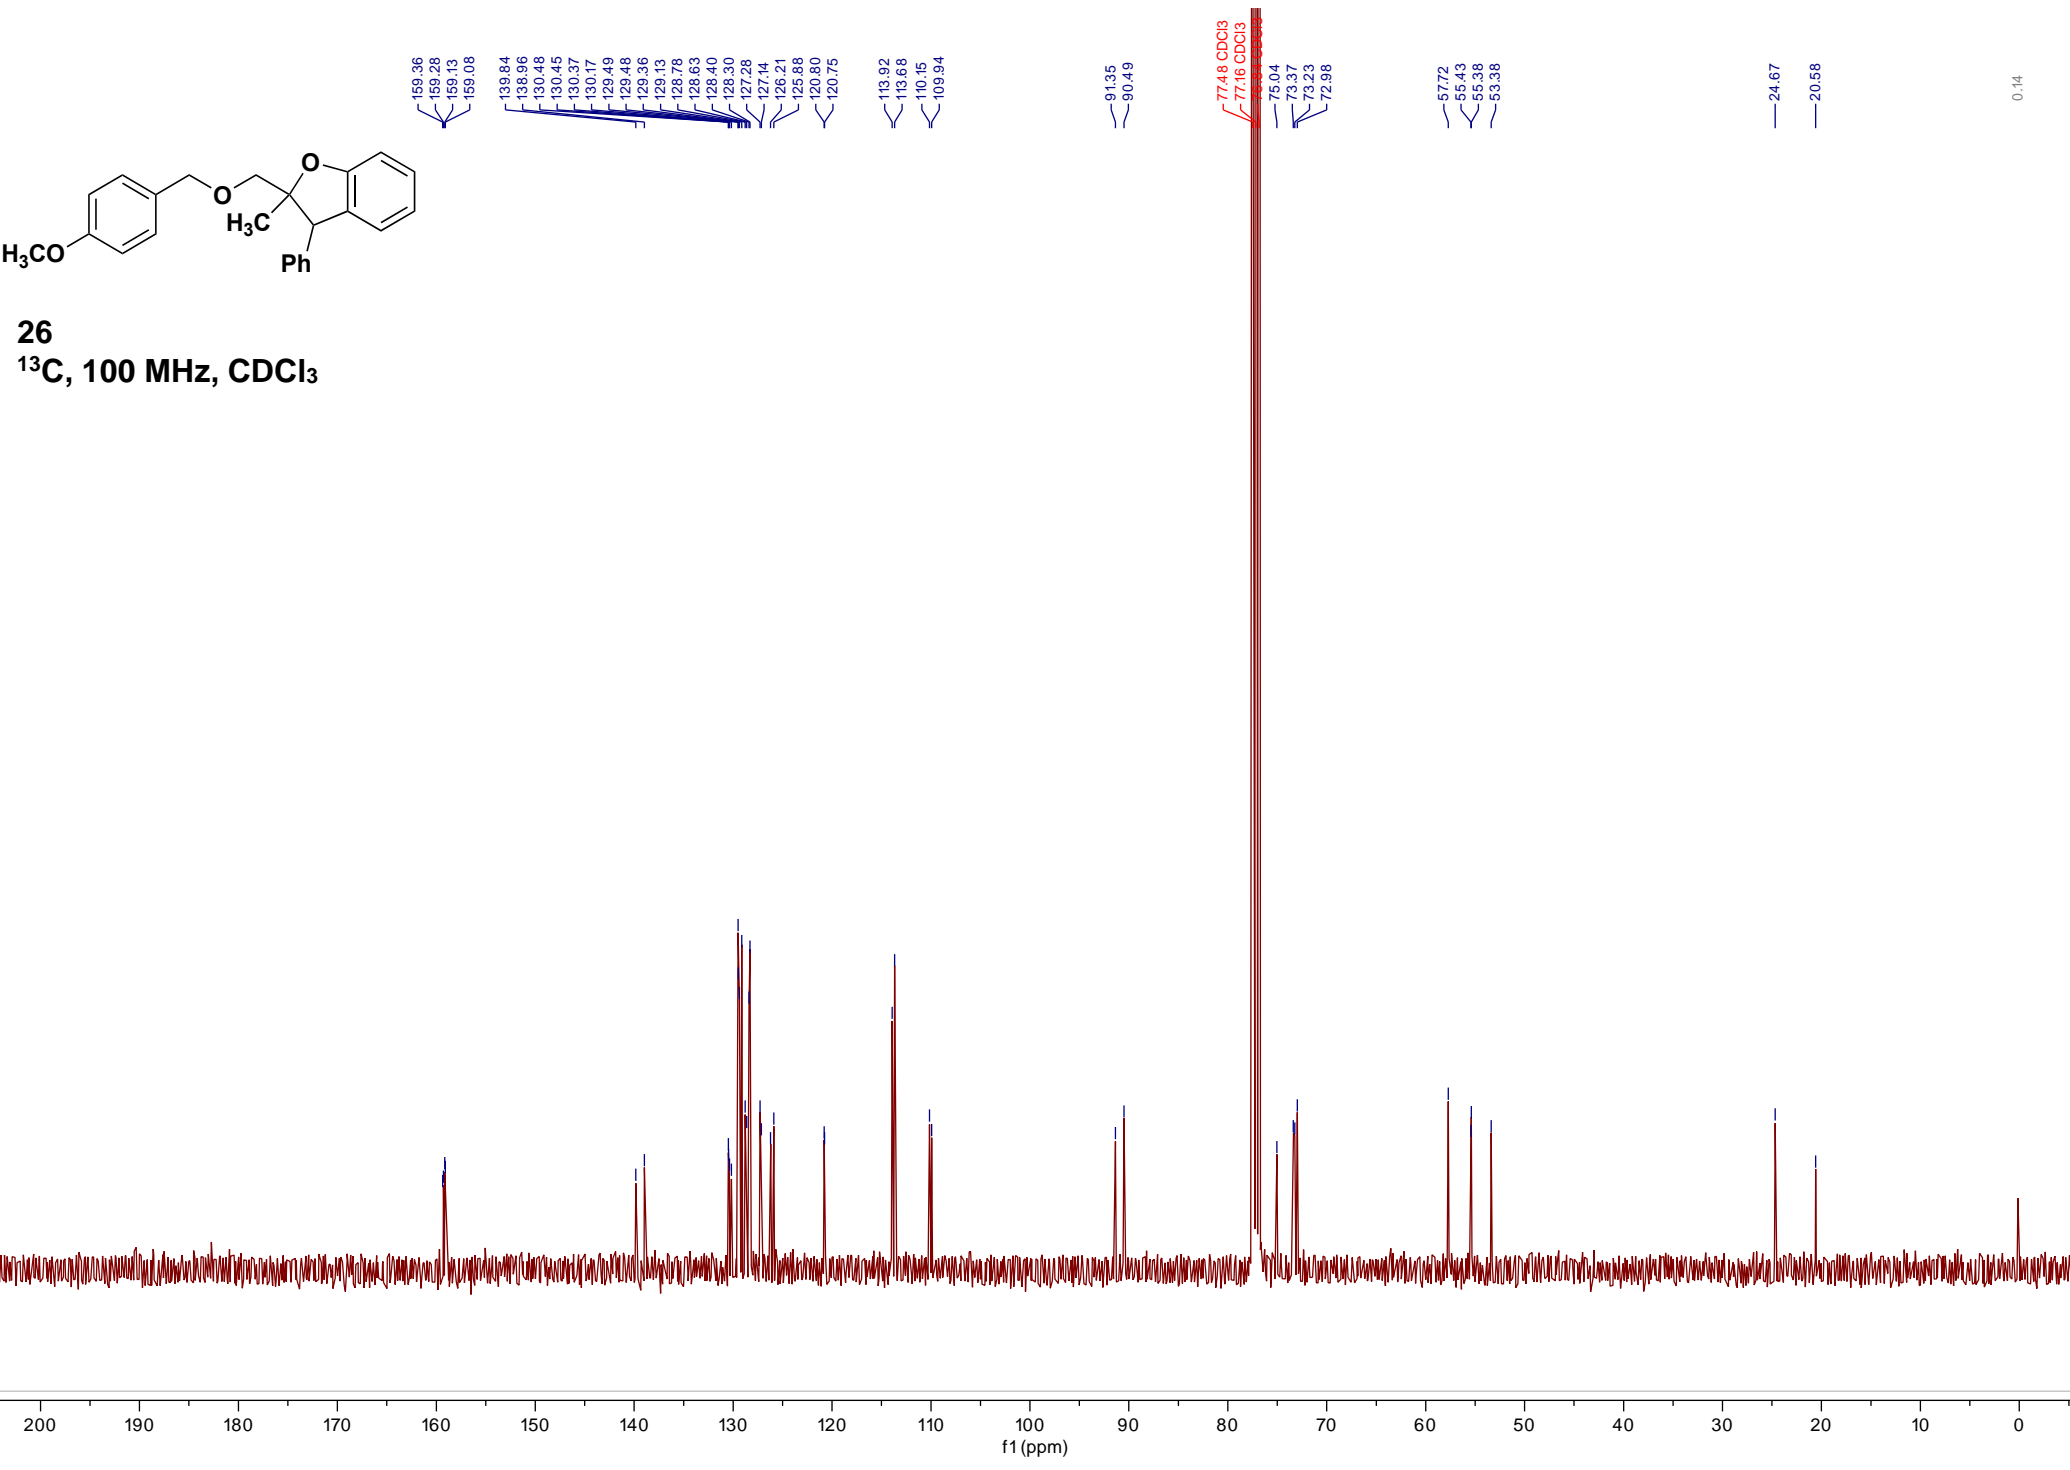

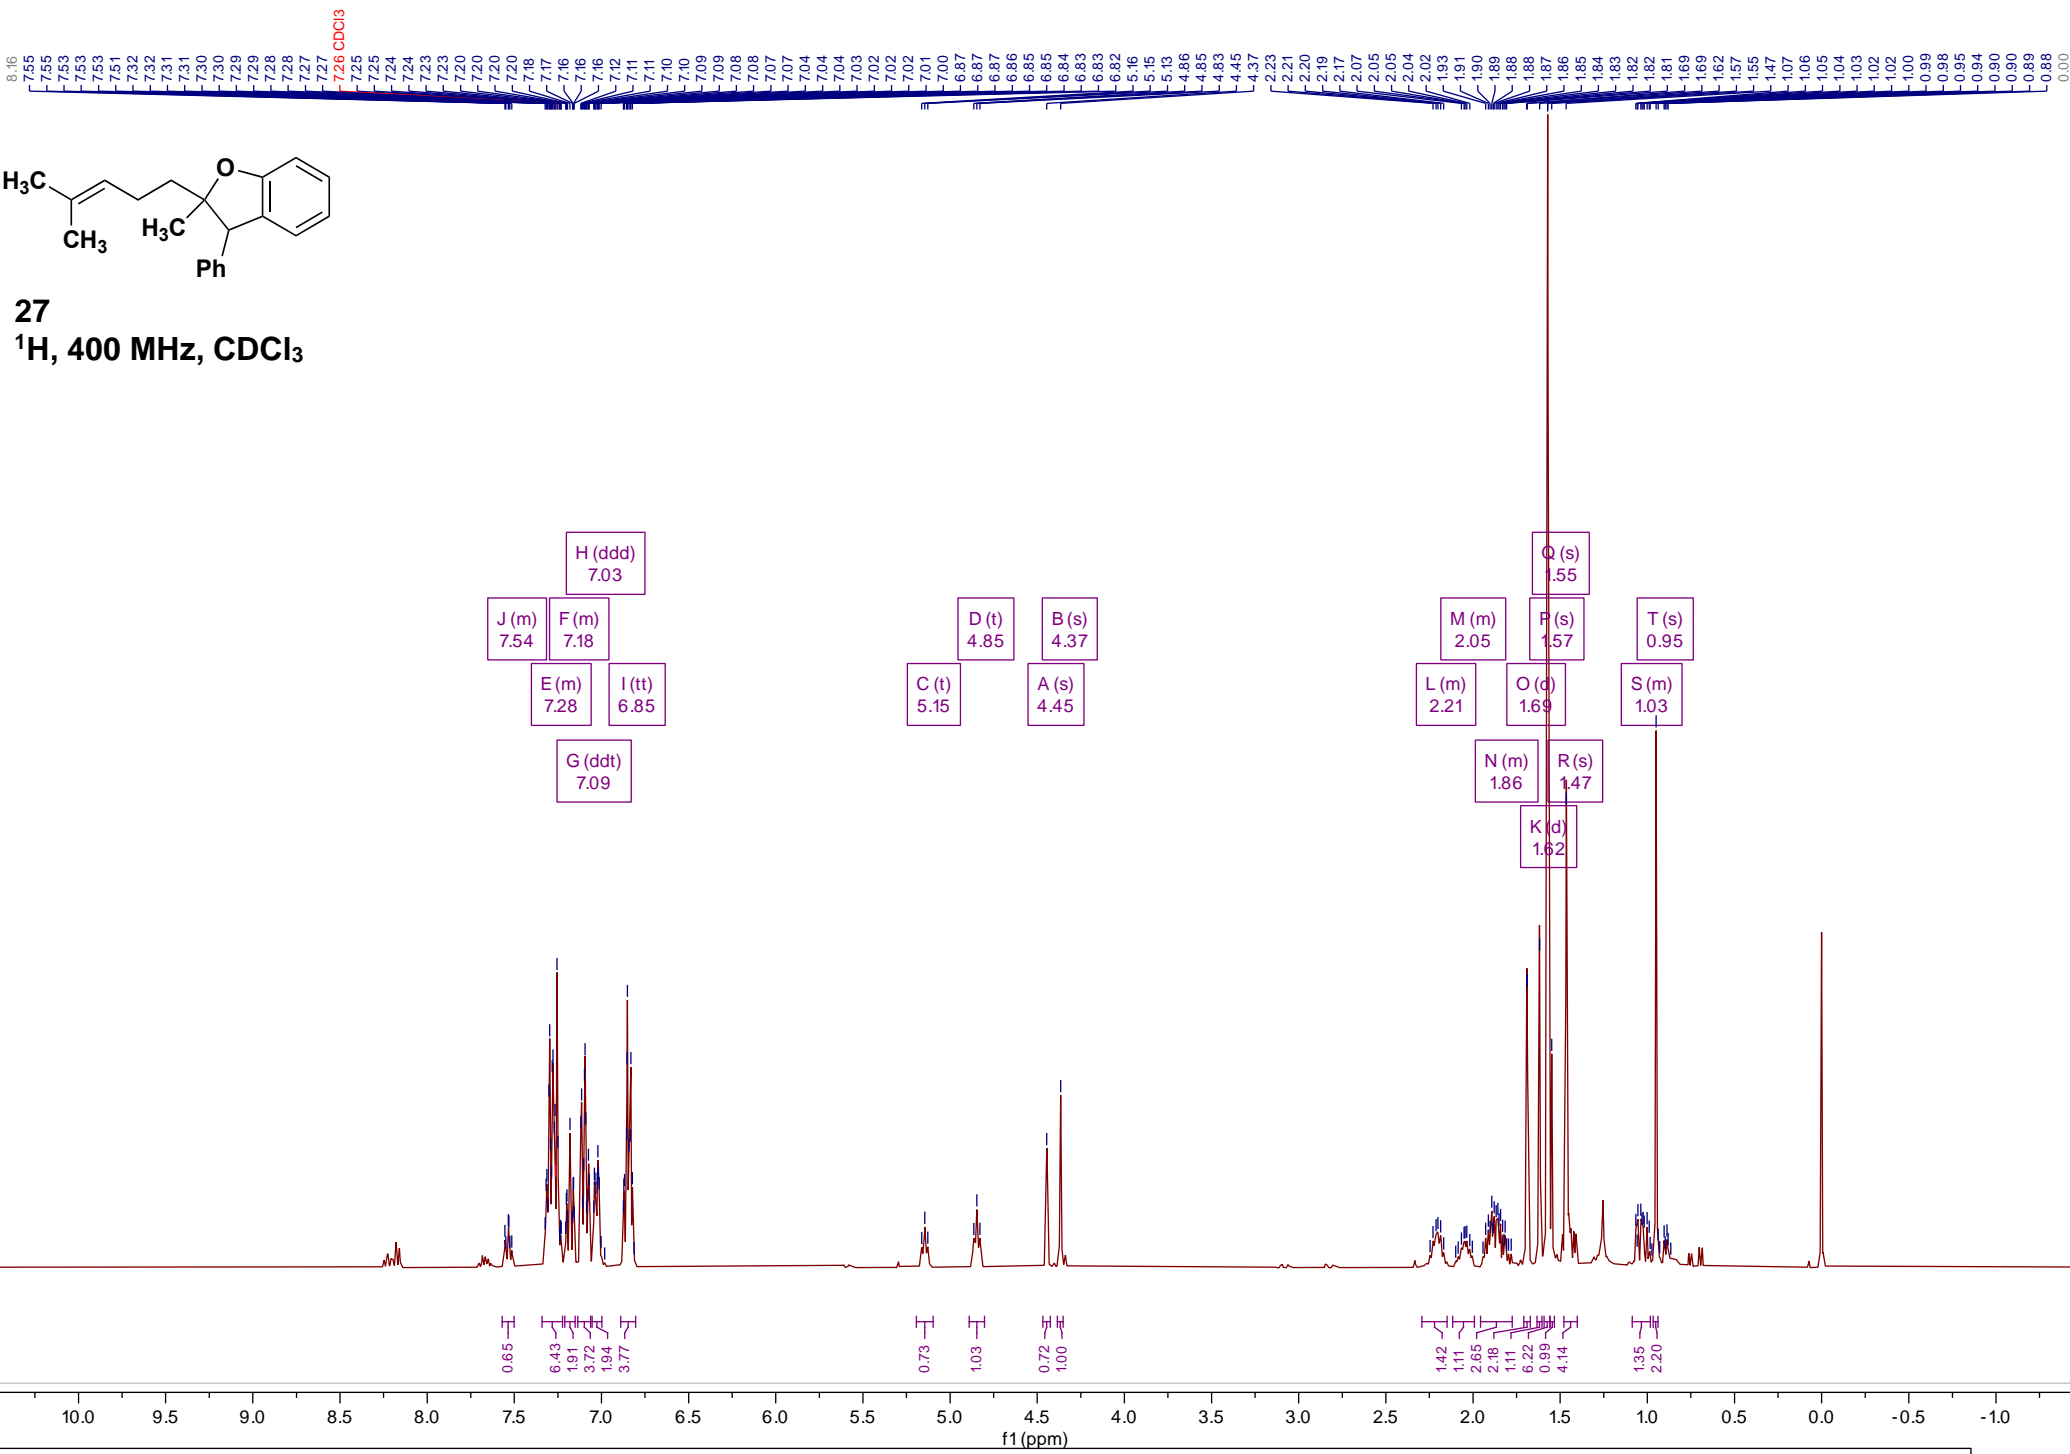

**Note:** Spectra is a mix of diastereomers, with the minor and major diastereomer peaks that can be assigned reported in the text above.



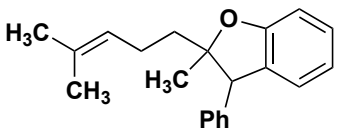

**27**  
**<sup>13</sup>C, 100 MHz, CDCl<sub>3</sub>**

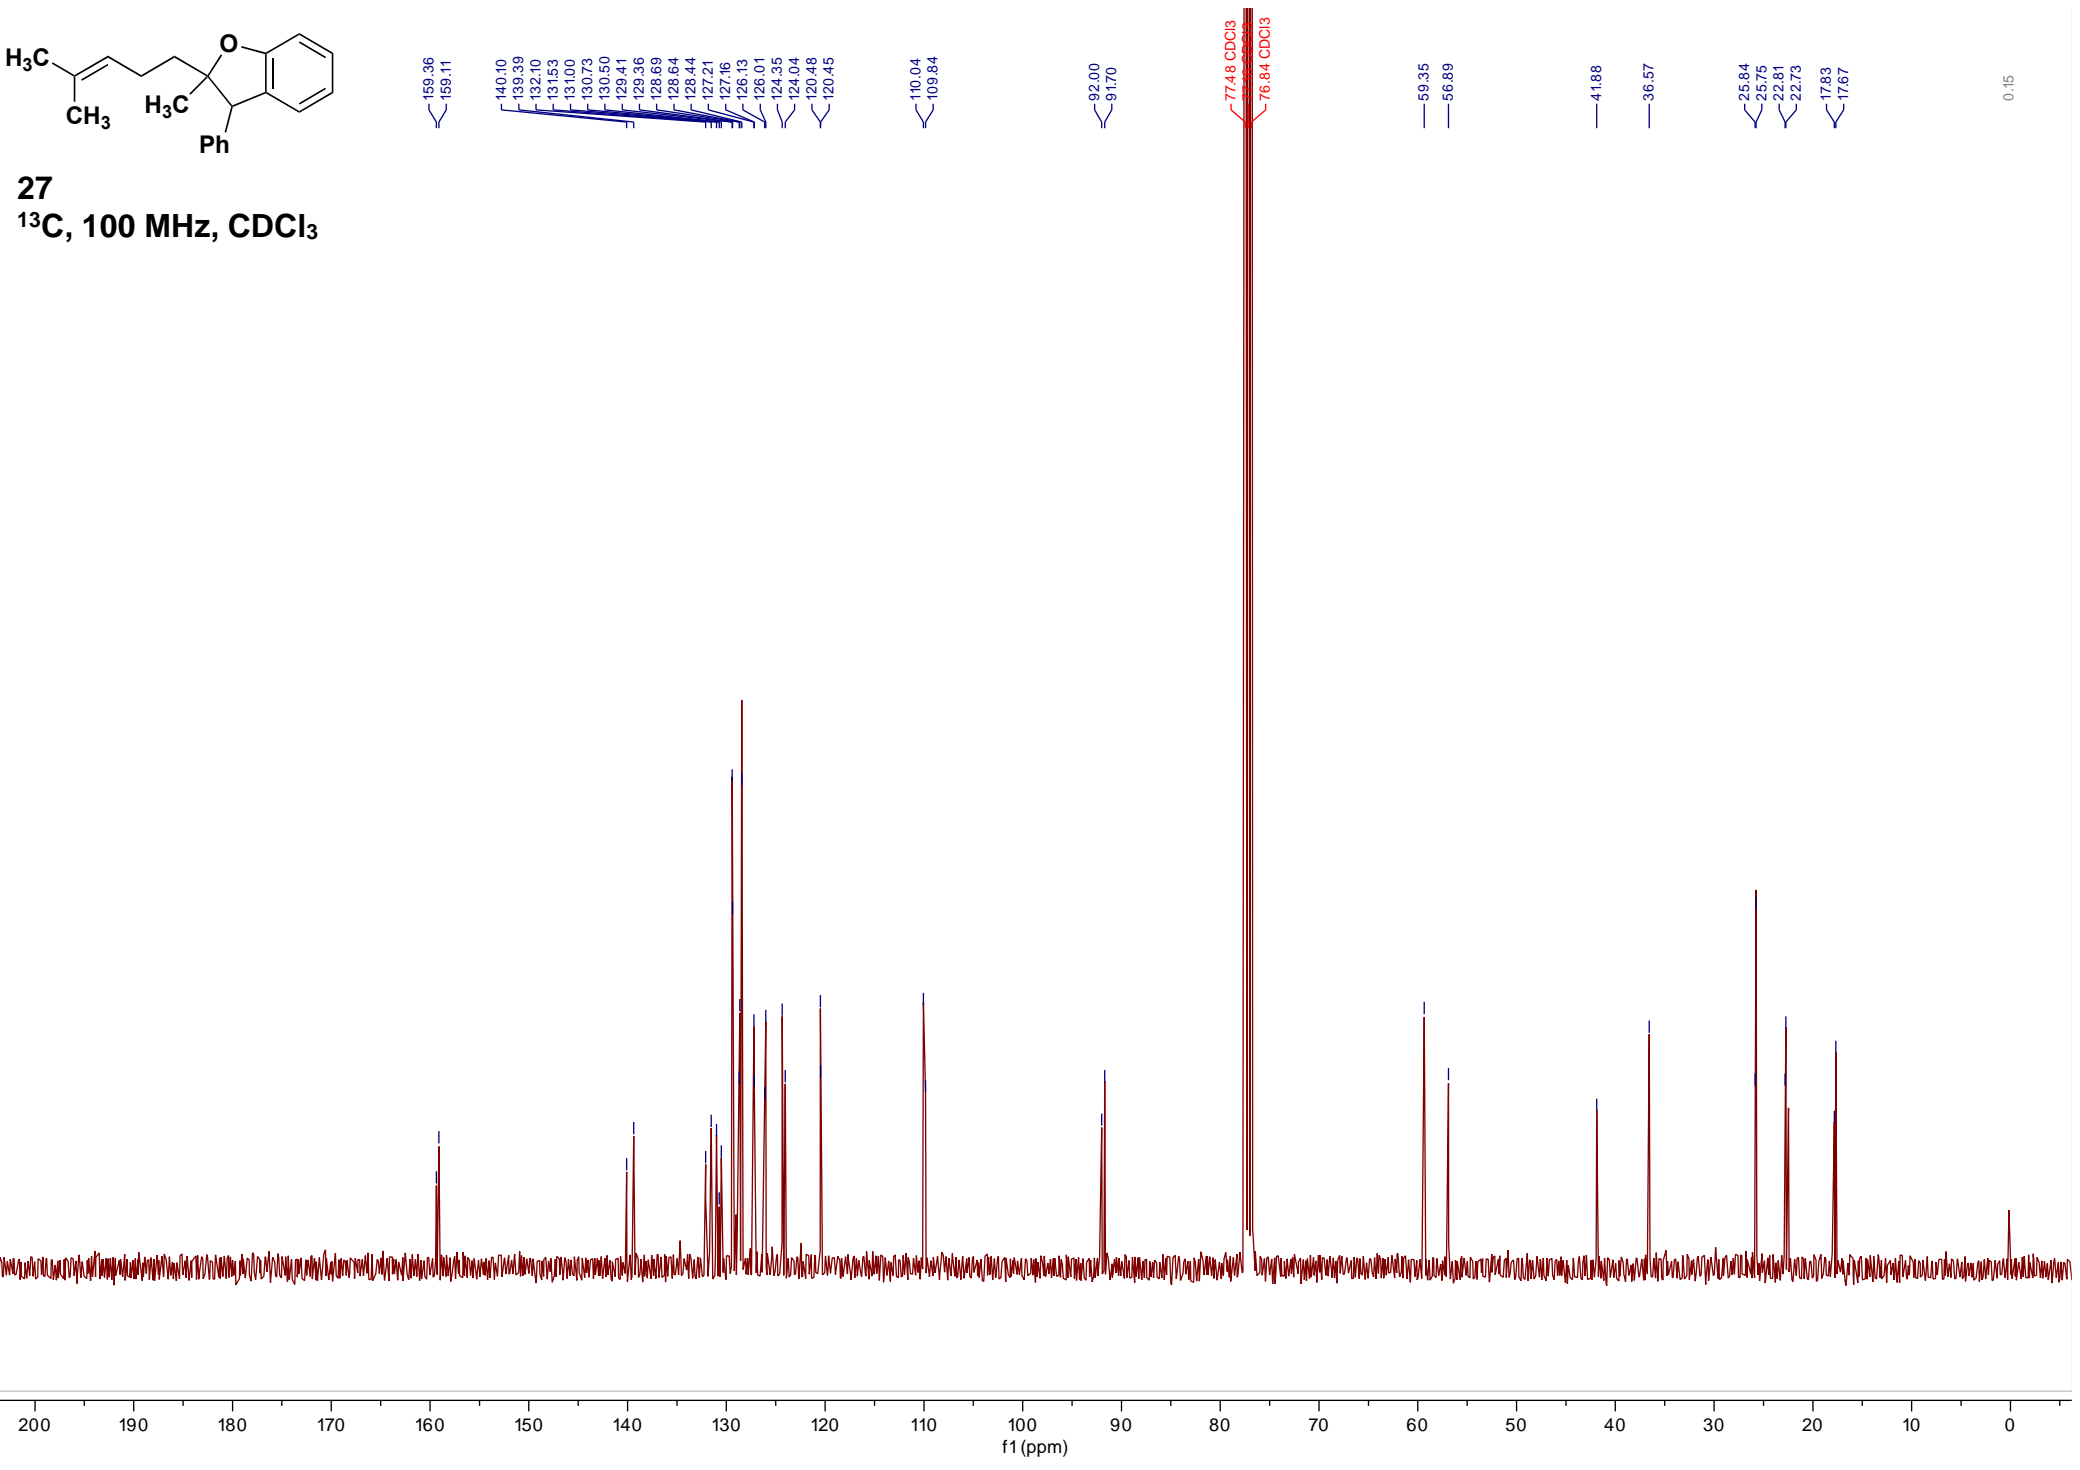

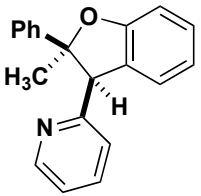

**23**  
<sup>1</sup>H, 400 MHz, CDCl<sub>3</sub>

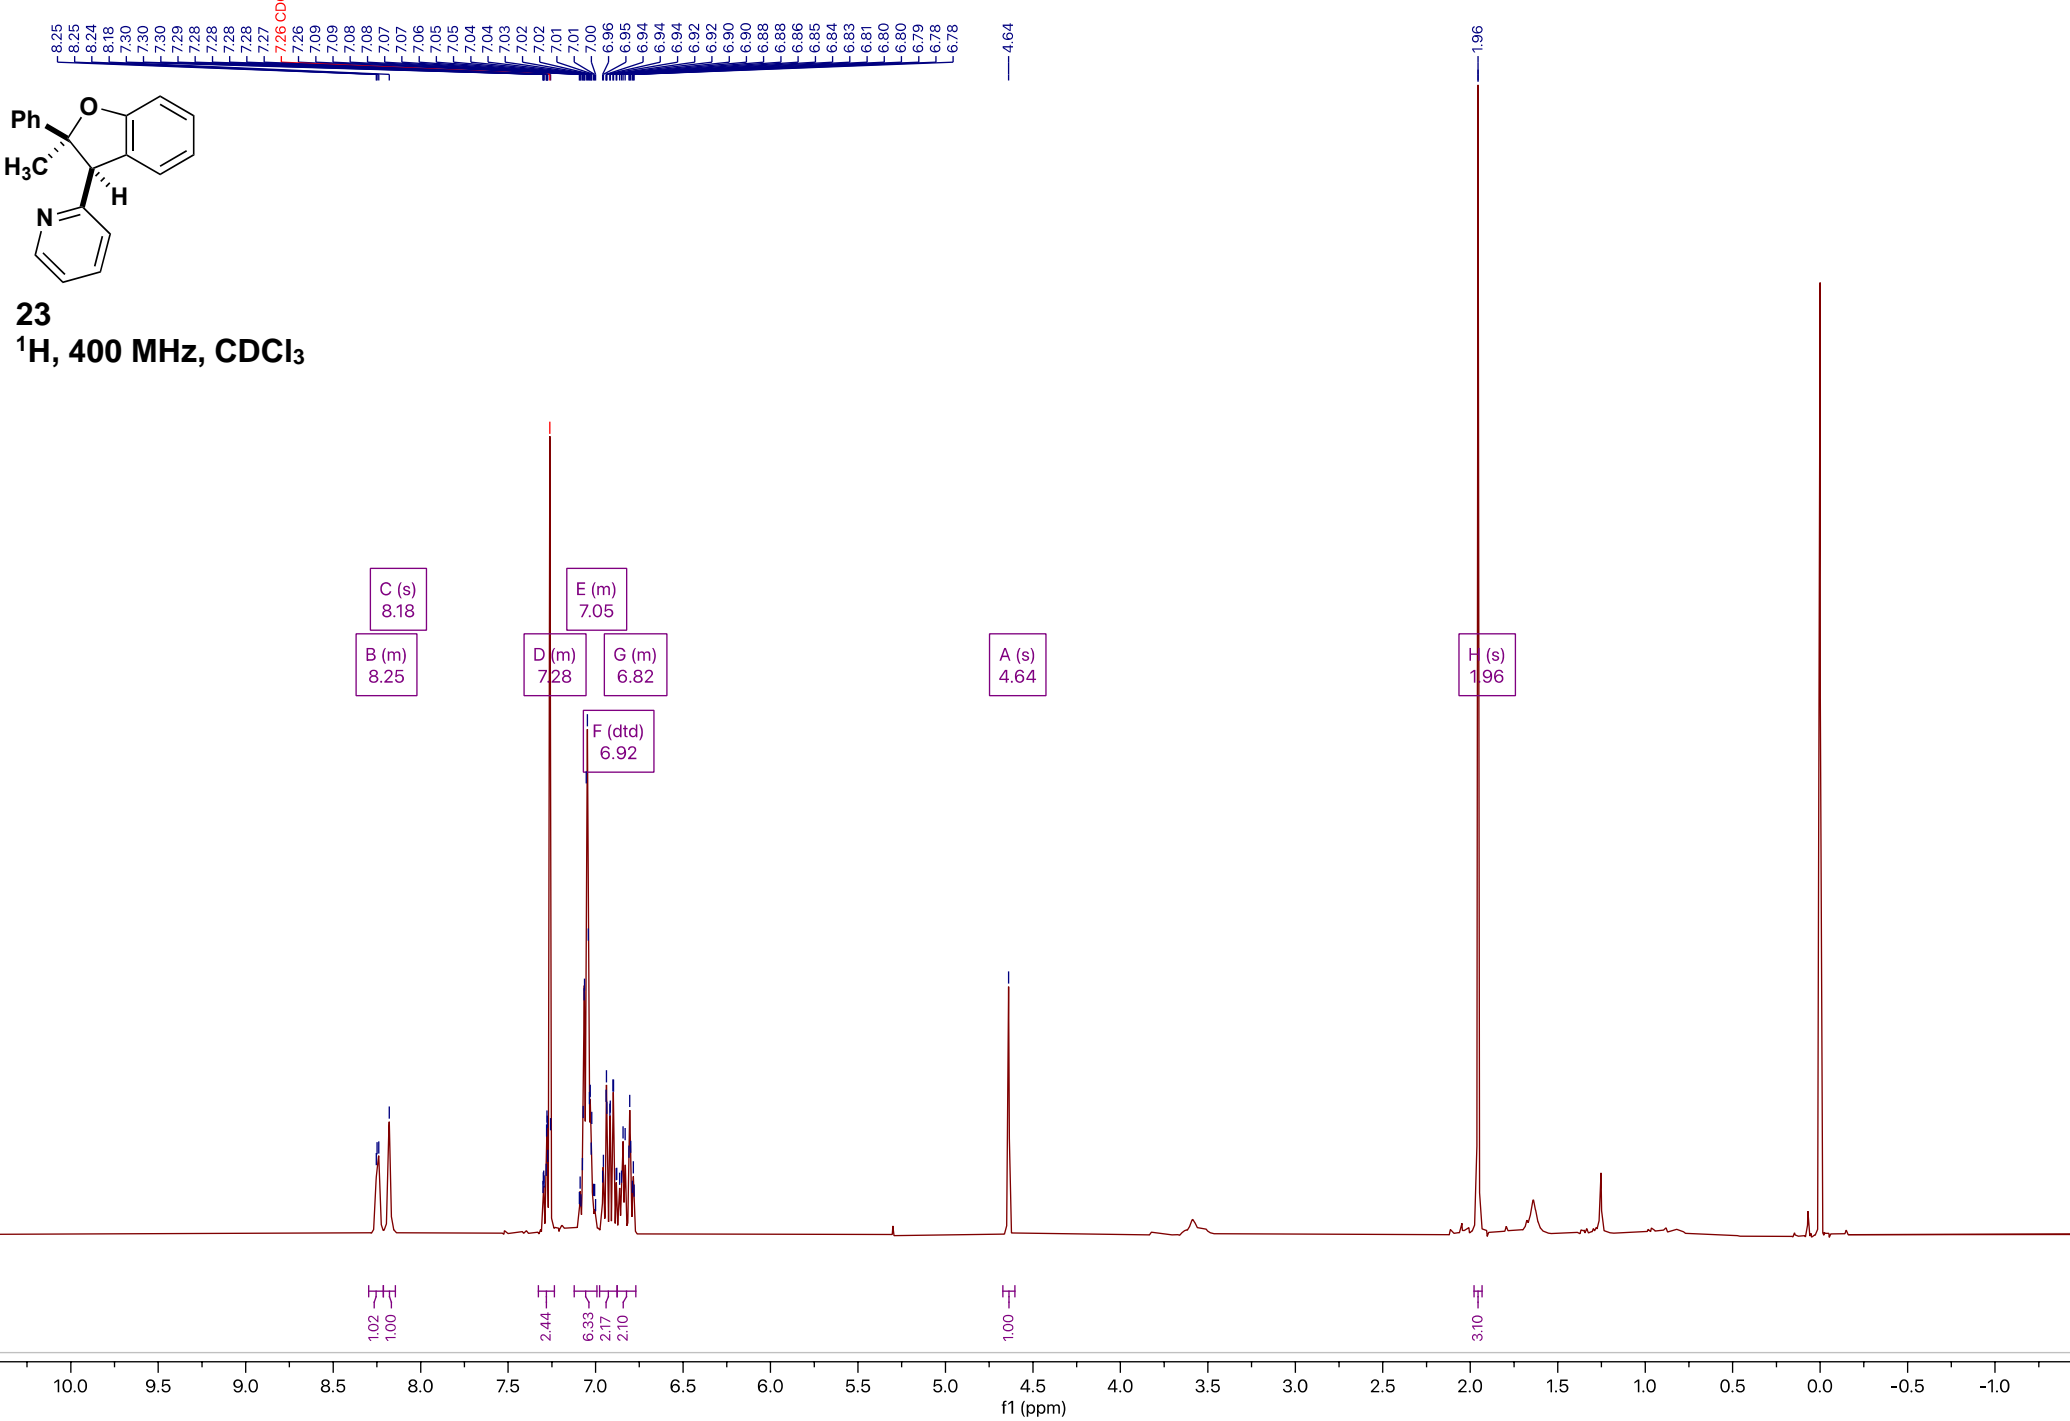

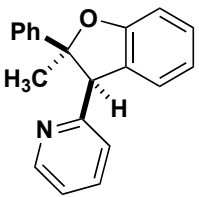

**23**  
<sup>13</sup>C, 100 MHz, CDCl<sub>3</sub>

159.26  
150.16  
148.24  
141.65  
136.43  
136.00  
129.96  
129.36  
127.89  
126.96  
125.93  
125.86  
122.96  
121.37

110.15

93.33

58.27

29.25

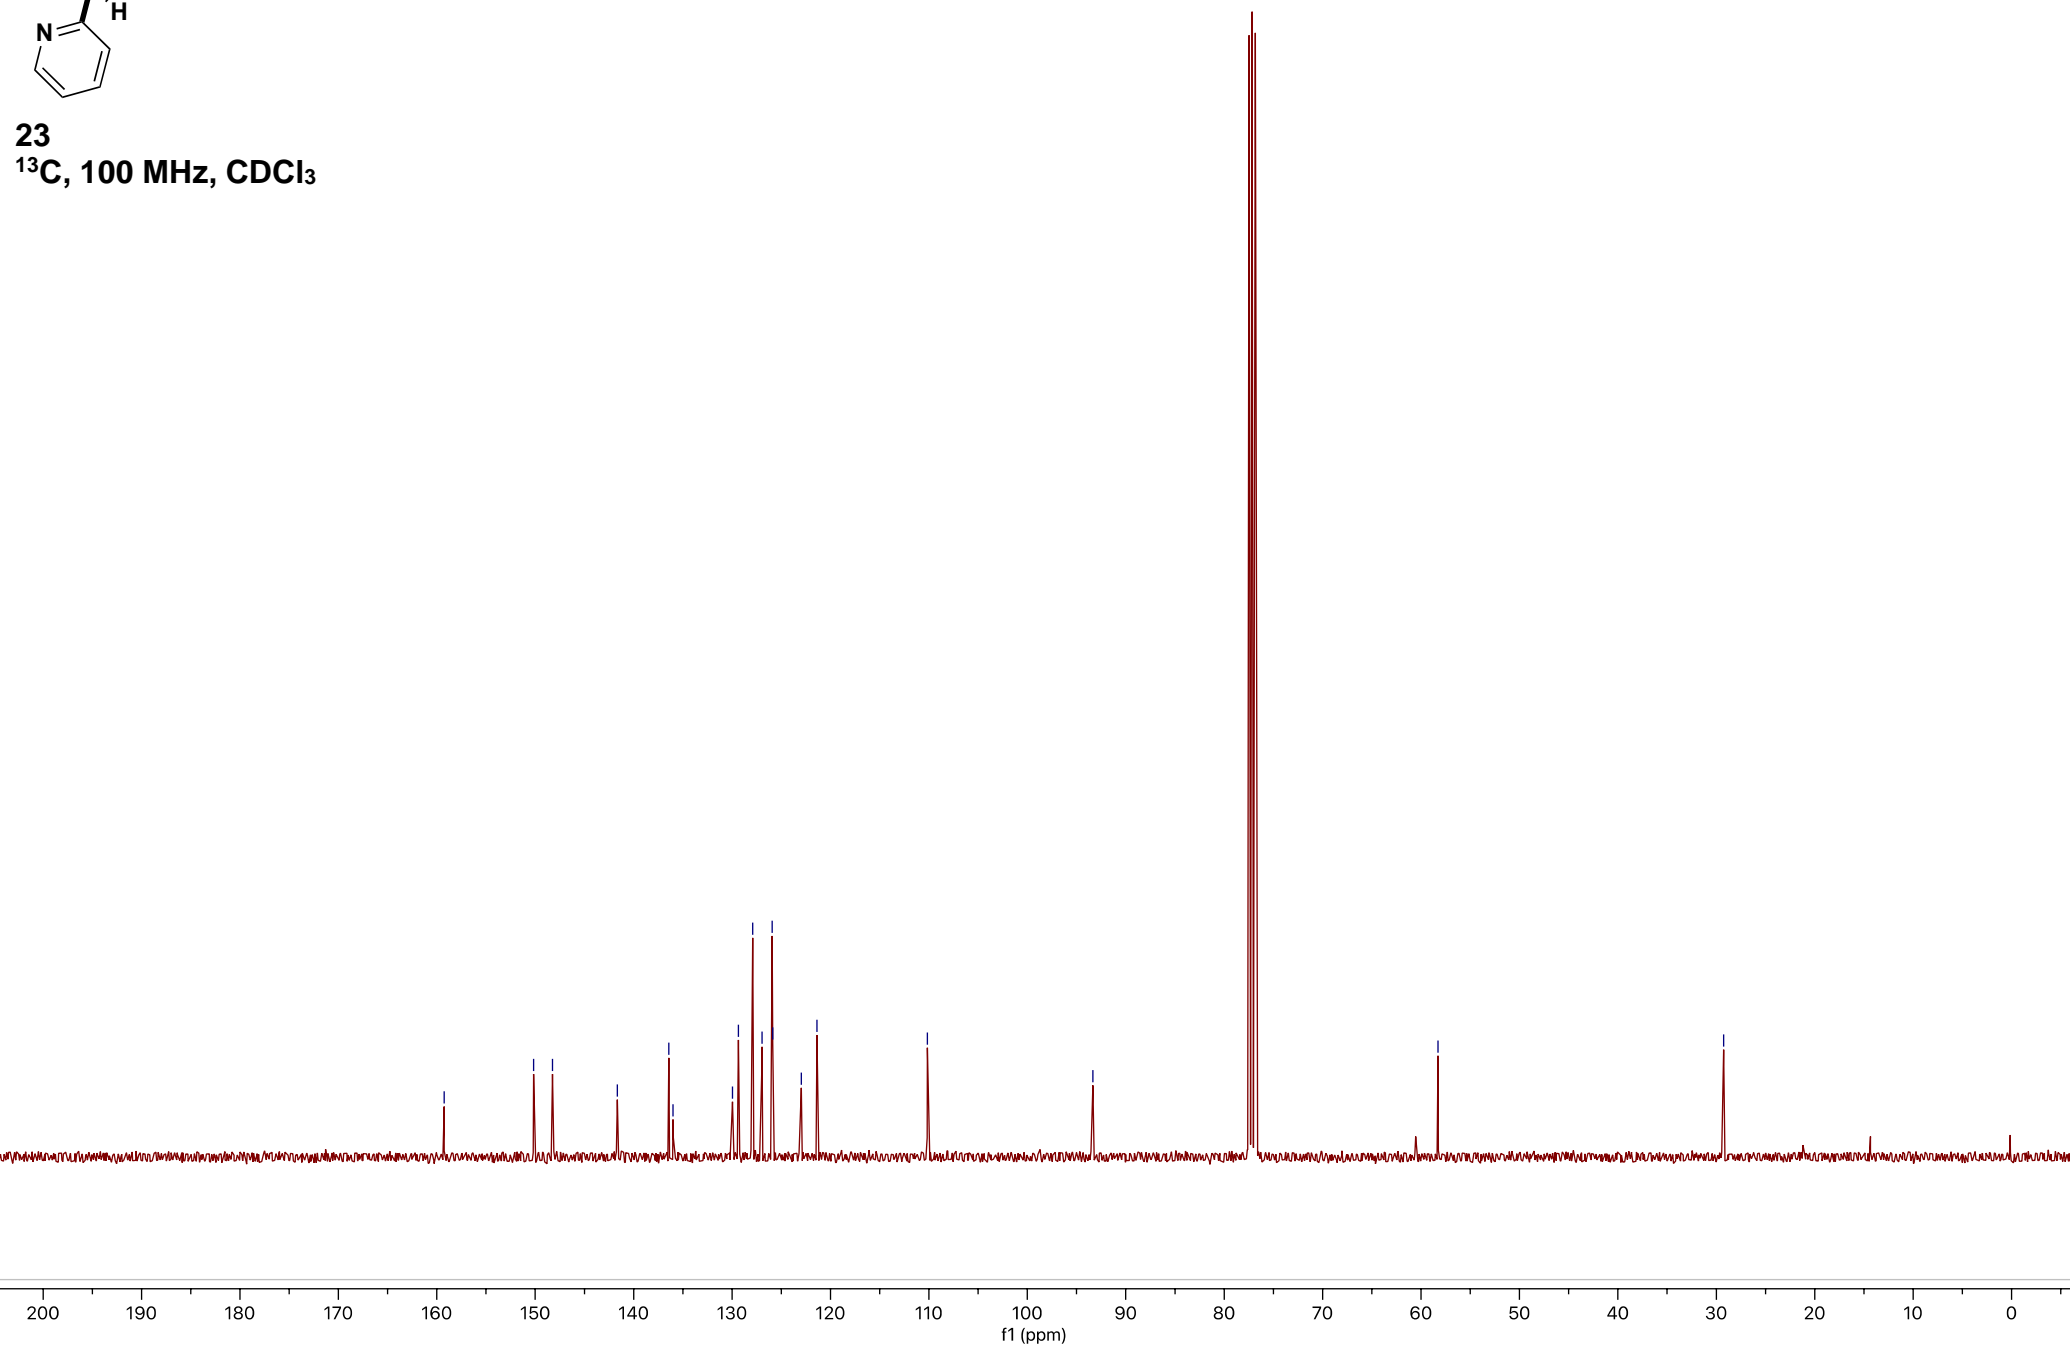

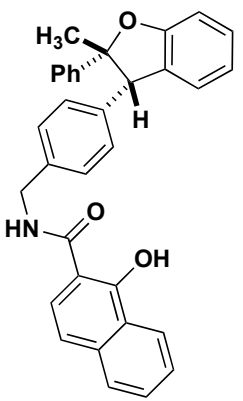

**43**  
<sup>1</sup>H, 600 MHz, CDCl<sub>3</sub>

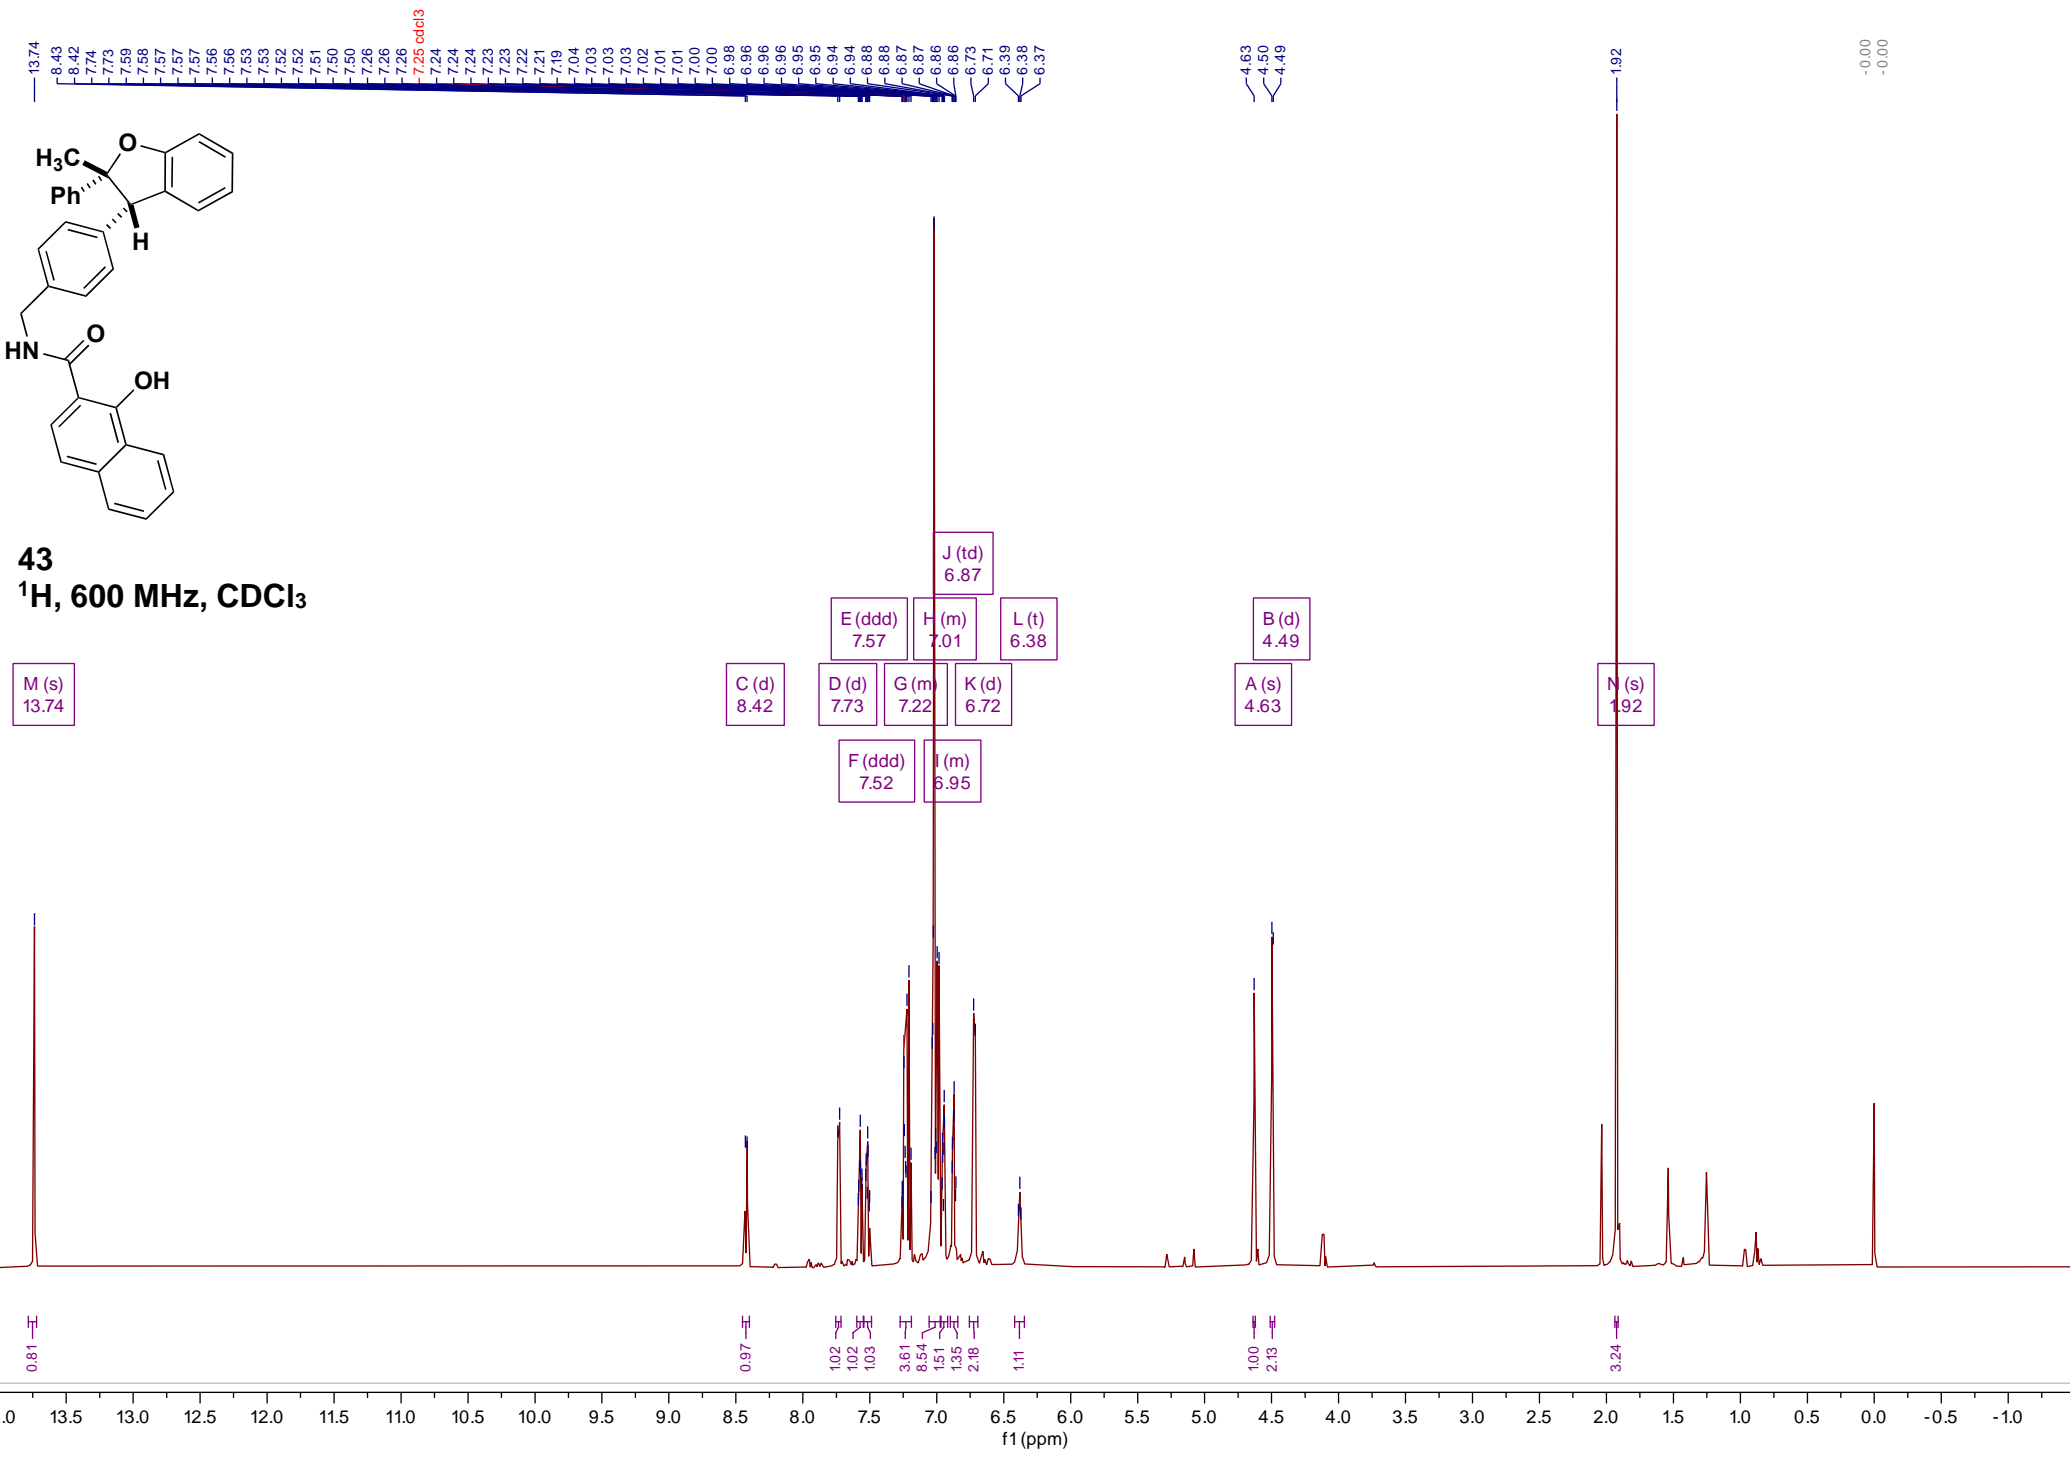

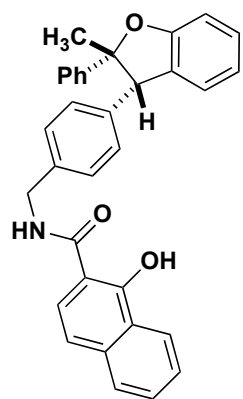

**43**  
<sup>13</sup>C, 150 MHz, CDCl<sub>3</sub>

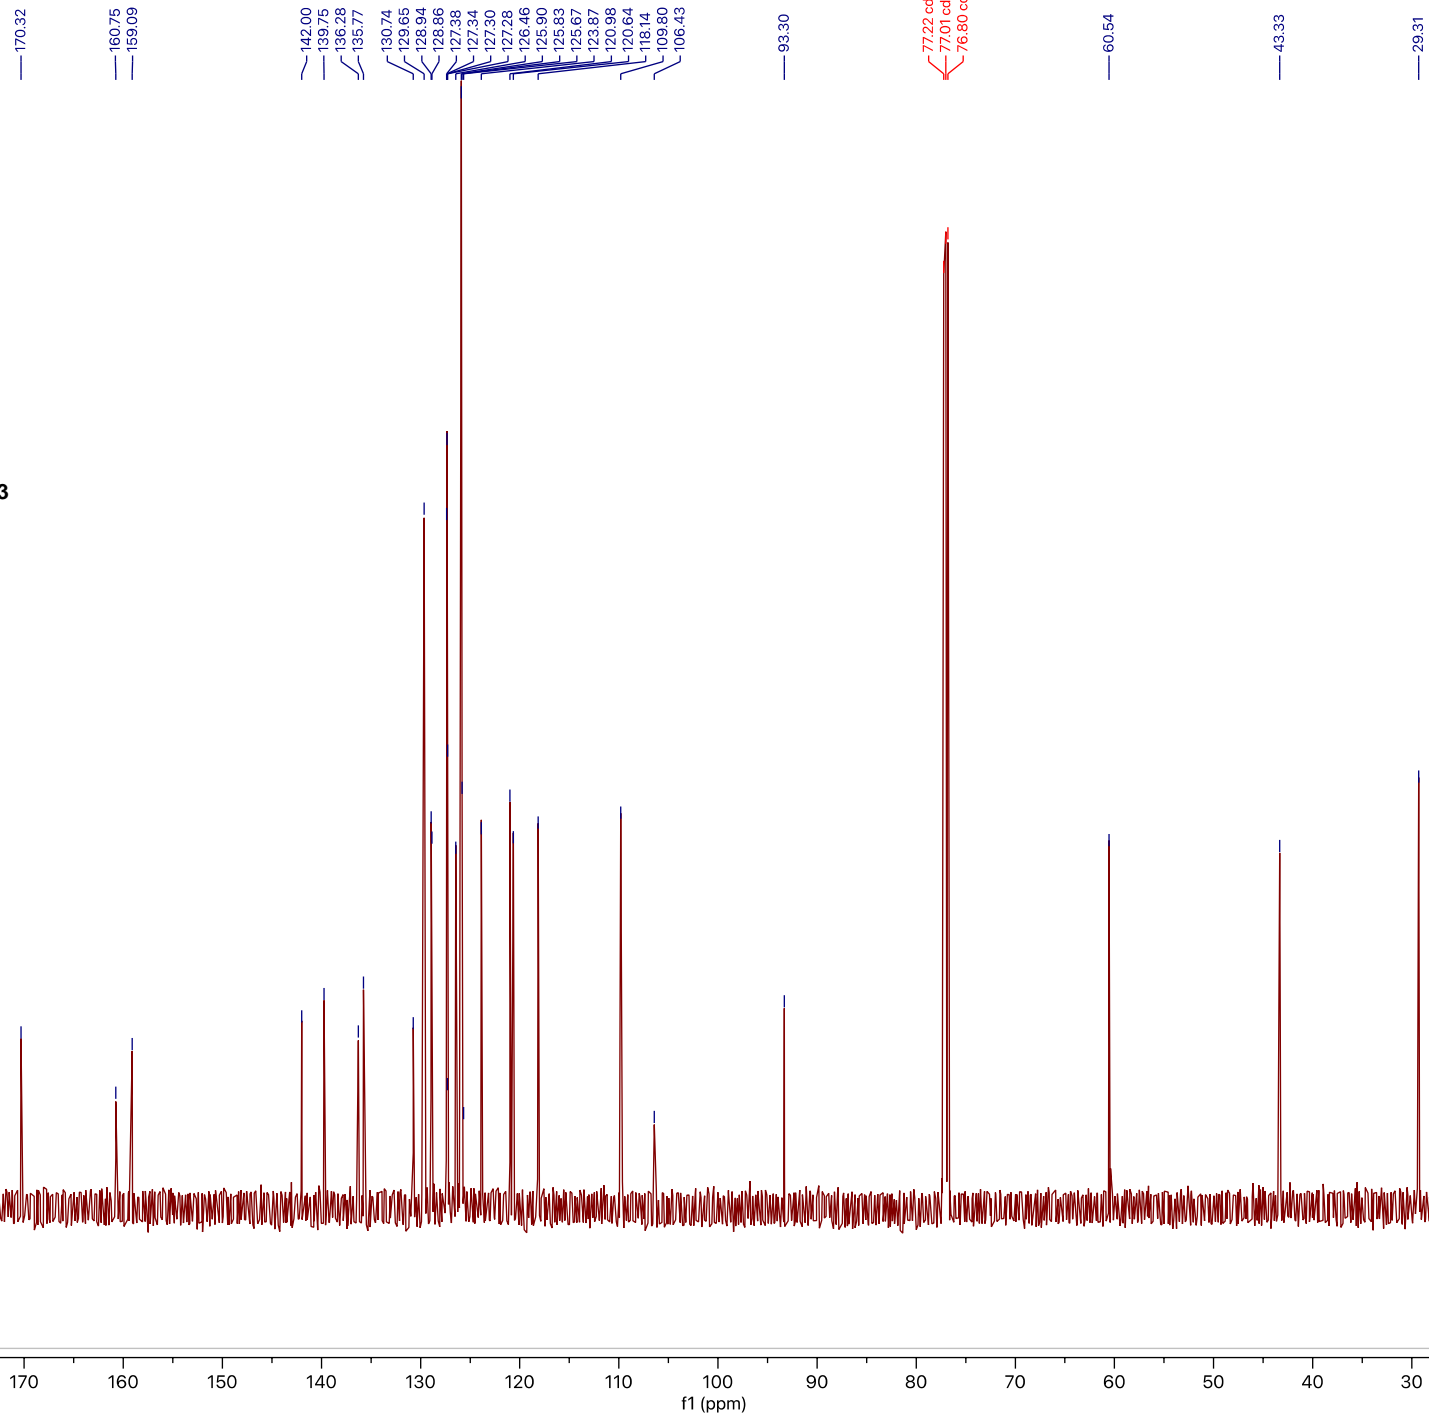

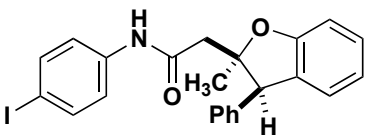

**44**  
<sup>1</sup>H, 600 MHz, CDCl<sub>3</sub>

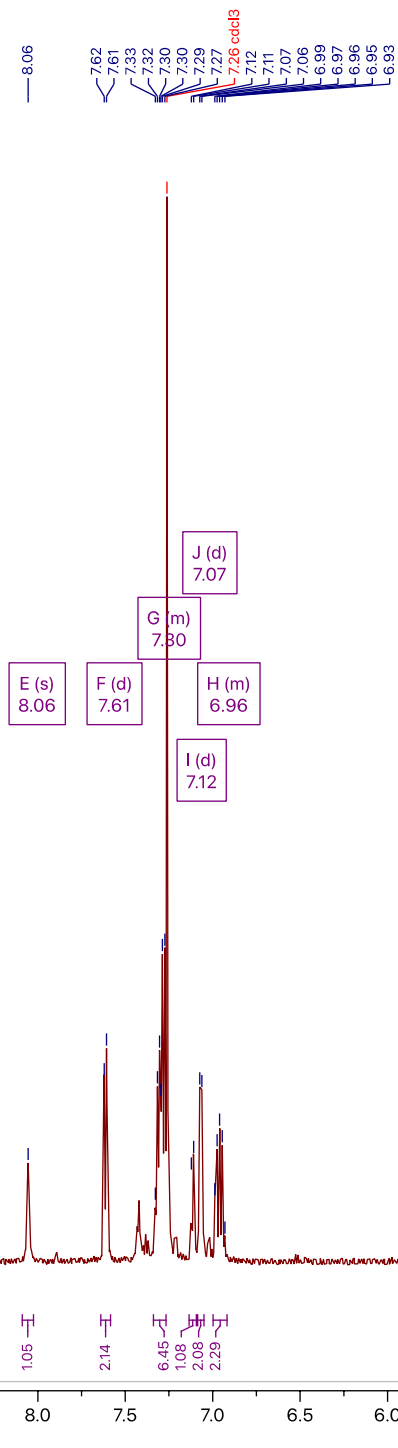

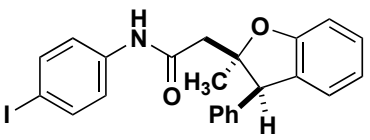

**44**  
<sup>13</sup>C, 100 MHz, CDCl<sub>3</sub>

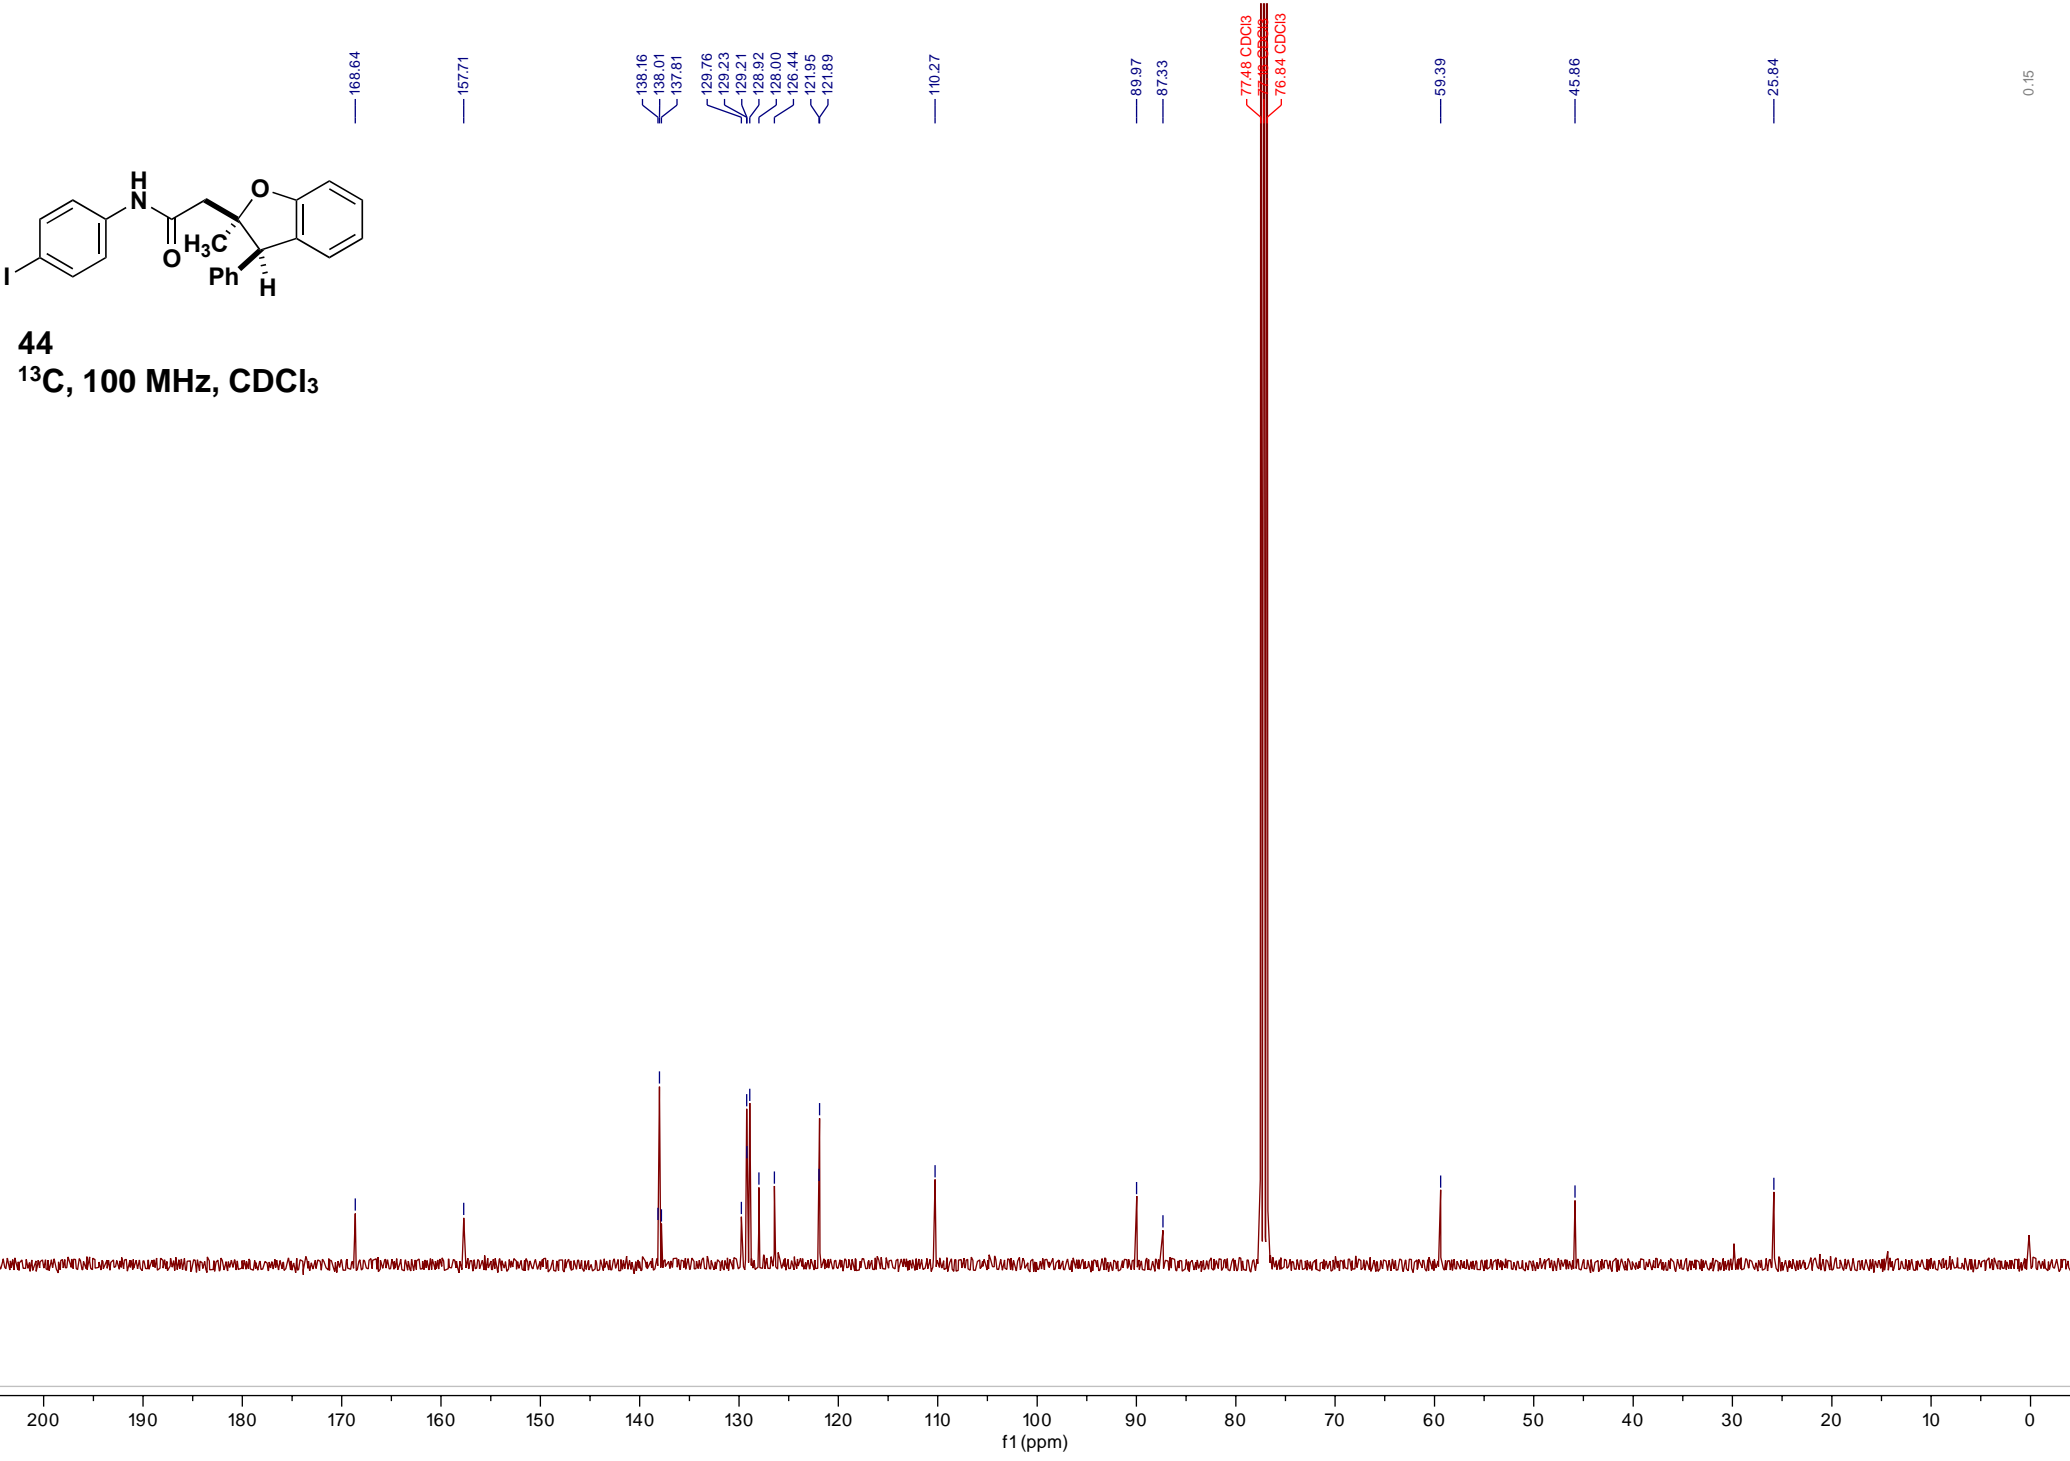

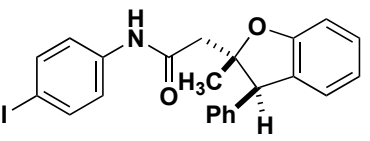

**45**  
 $^1\text{H}$ , 600 MHz,  $\text{CDCl}_3$

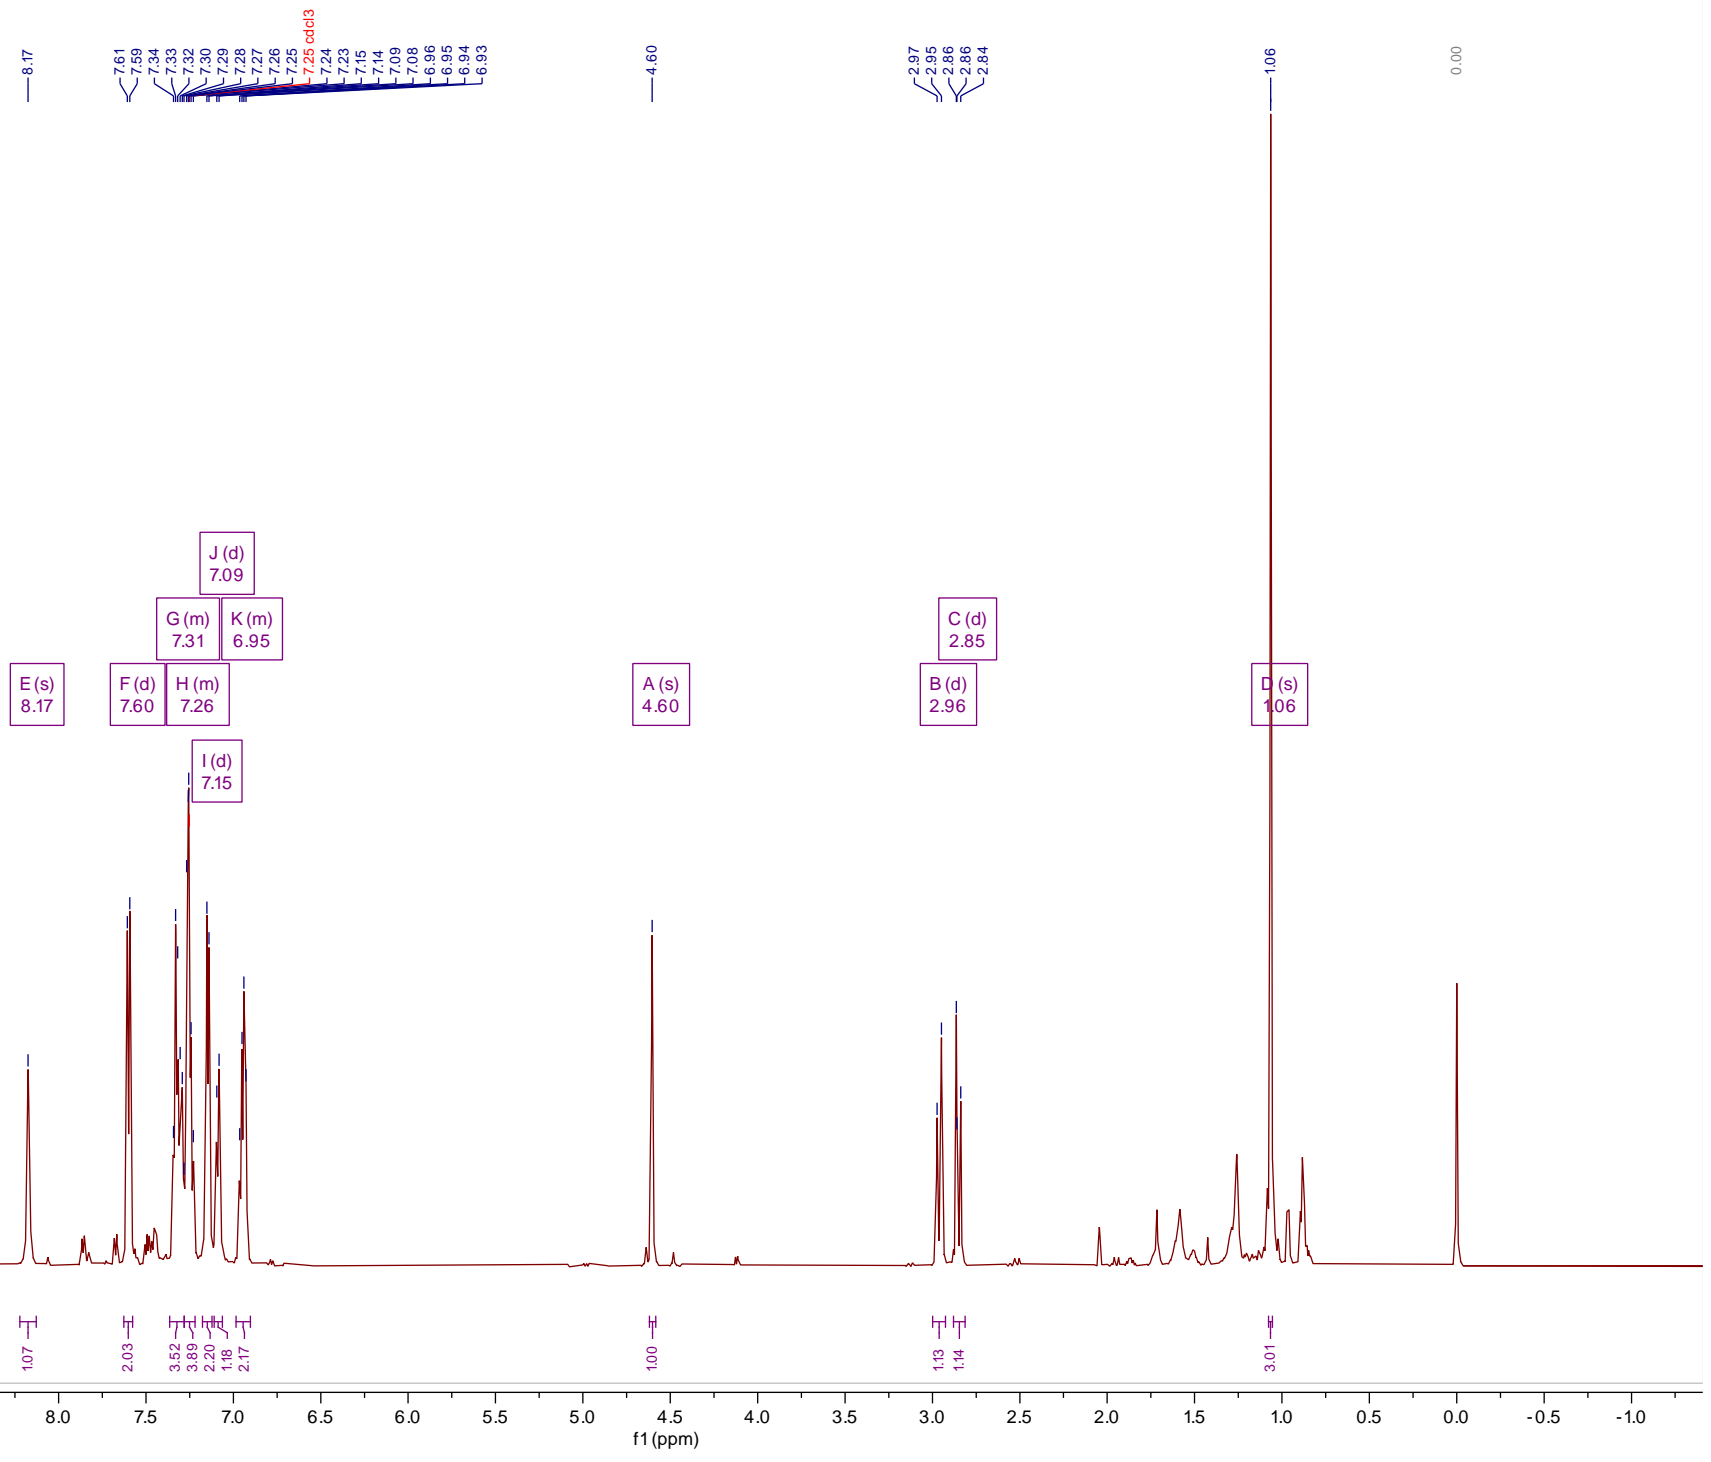



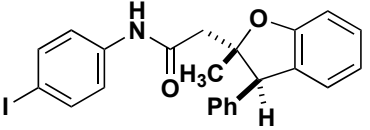

**45**  
**<sup>13</sup>C, 100 MHz, CDCl<sub>3</sub>**

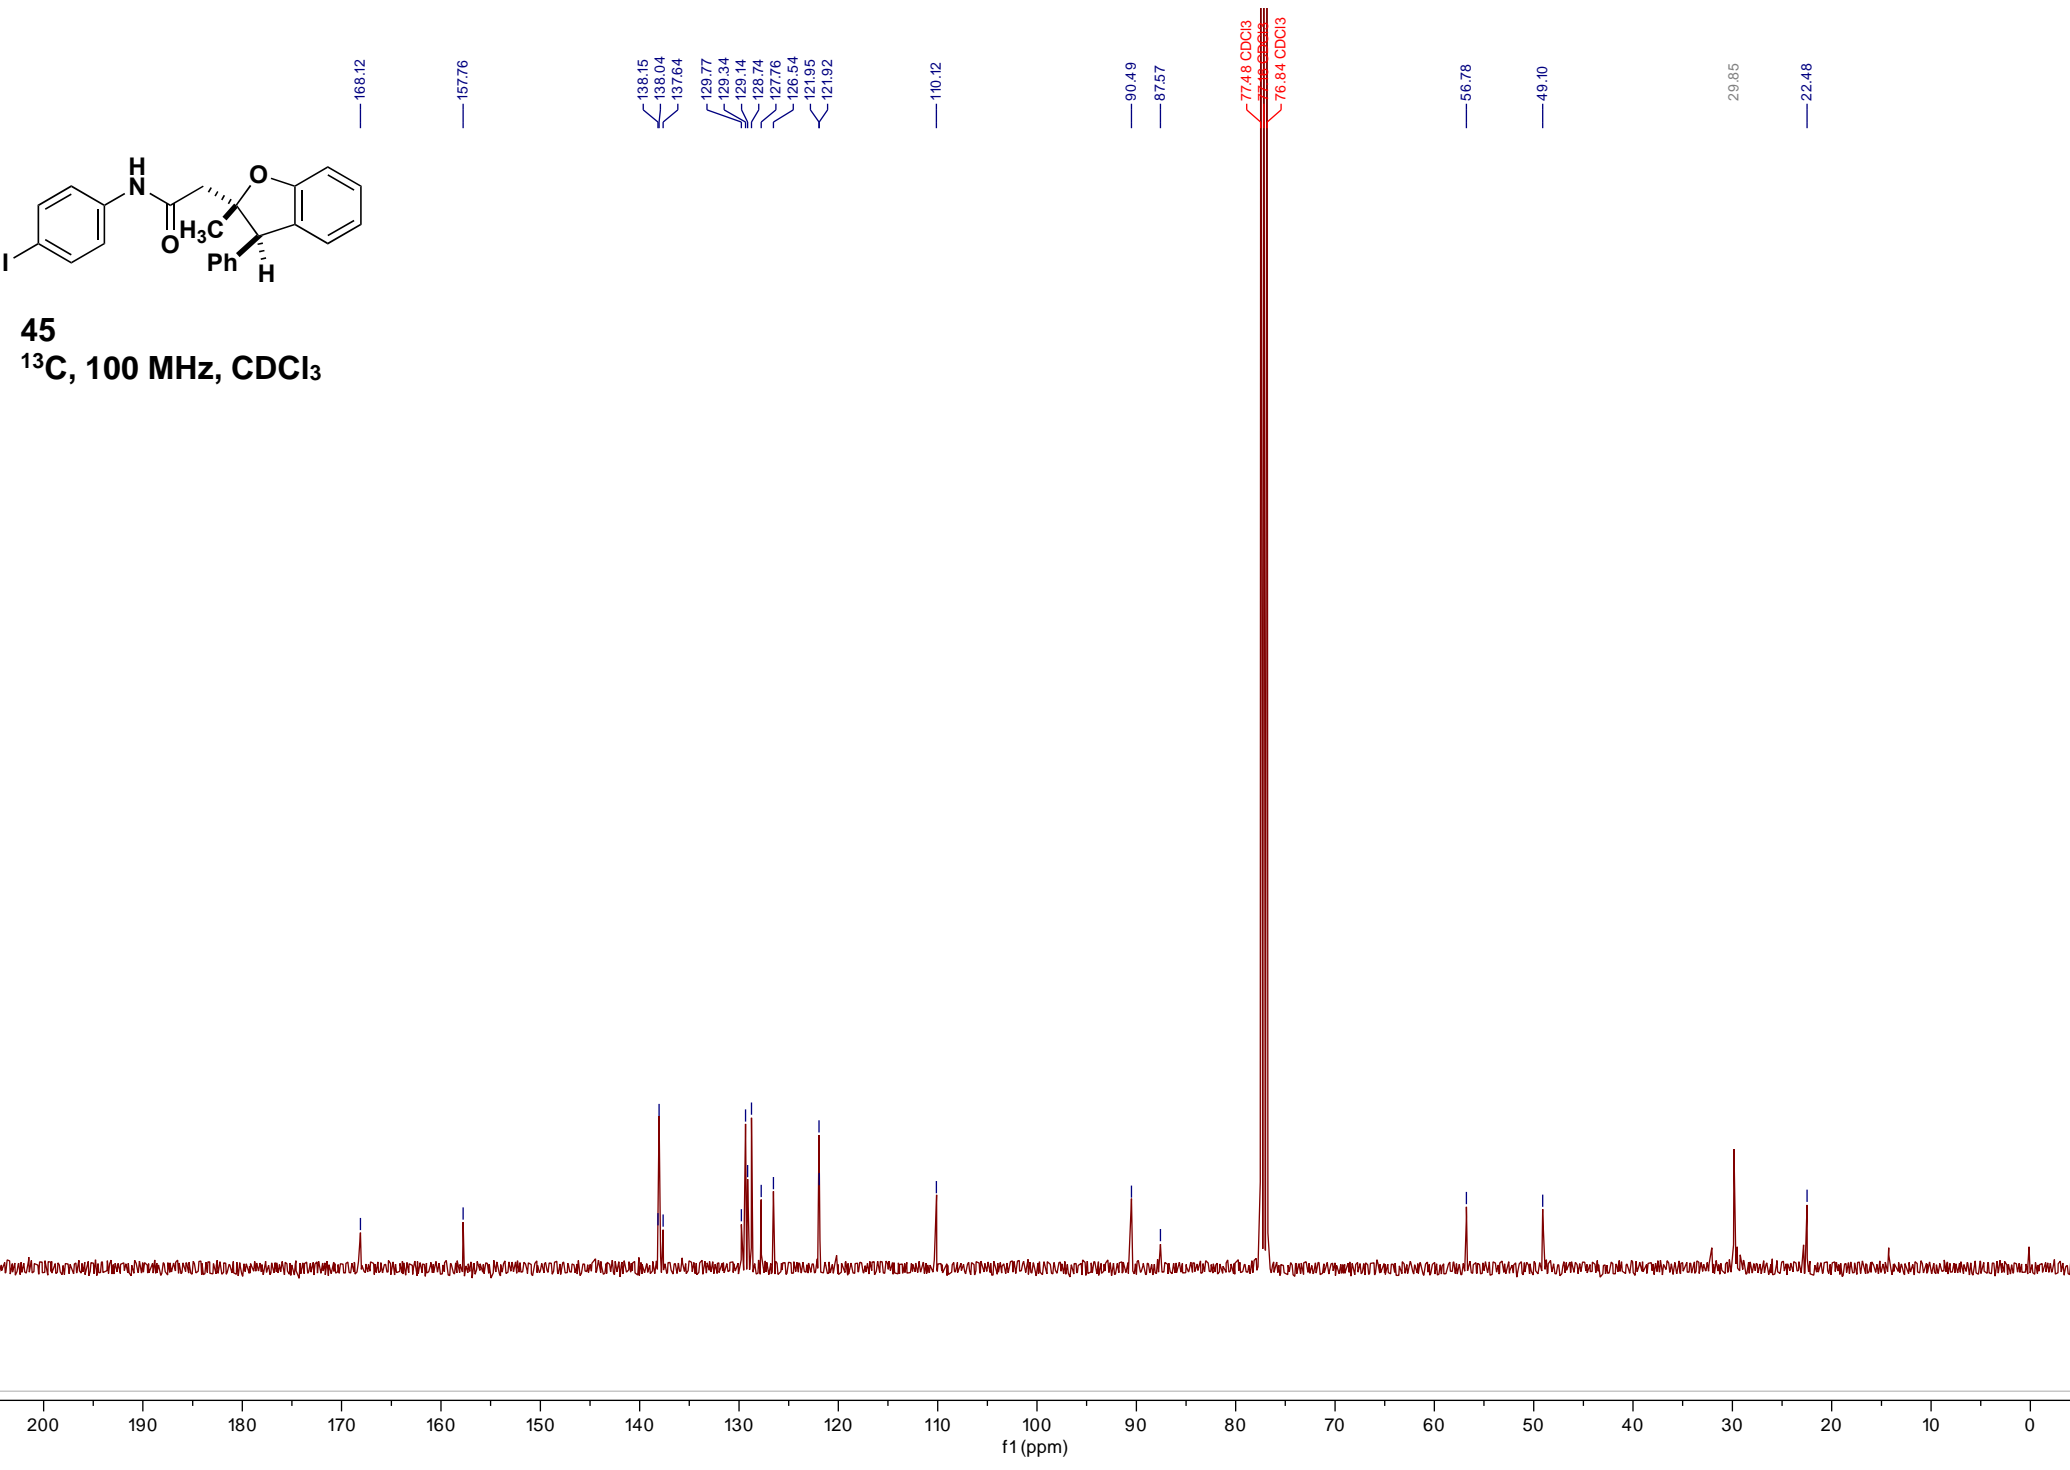

Supplement: d1sc04622e1.pdf [file d1sc04622e1.pdf]
